# Supplementary material for: Assessing drug safety by identifying the axis of arrhythmia in cardiomyocyte electrophysiology
Source: bioRxiv preprint, doi:10.1101/2023.04.19.537441, version 4 (2023-10-11)
Supplement: Supplementary Dataset S1 [file 537441_file03.csv]

DrugID	Compound	Class	EFTPC	Cmax	Conc	GKrScale	GNaScale	GNaLScale	GCaLScale	GKsScale	GK1Scale	GtoScale	LogGKrScale	LogGNaScale	LogGNaLScale	LogGCaLScale	LogGKsScale	LogGK1Scale	LogGtoScale	Score
1	Ajmaline	1	1500	1	1500	0.732142857142857	0.95945945945946	1	0.979253112033195	1	1	0.945255474452555	-0.311779624030841	-0.0413852161628542	0	-0.0209651284650448	0	0	-0.0563000446885326	0.178944747198913
1	Ajmaline	1	1500	2	3000	0.577464788732394	0.922077922077922	1	0.959349593495935	1	1	0.896193771626298	-0.549107810337008	-0.0811255448123683	0	-0.0414997309067526	0	0	-0.109598626412894	0.312296531462437
1	Ajmaline	1	1500	3	4500	0.476744186046512	0.8875	1	0.940239043824701	1	1	0.851973684210526	-0.7407752295492	-0.119346757632566	0	-0.0616211341061739	0	0	-0.160199639706684	0.41777962281317
1	Ajmaline	1	1500	4	6000	0.405940594059406	0.855421686746988	1	0.921875	1	1	0.811912225705329	-0.901548450136952	-0.156160730755283	0	-0.0813456394539524	0	0	-0.208363041085307	0.504480059591605
1	Ajmaline	1	1500	5	7500	0.353448275862069	0.825581395348837	1	0.904214559386973	1	1	0.775449101796407	-1.04001812440206	-0.191667419212192	0	-0.100688602297083	0	0	-0.254312931277163	0.577680095983089
1	Ajmaline	1	1500	6	9000	0.312977099236641	0.797752808988764	1	0.887218045112782	1	1	0.742120343839542	-1.16162525649684	-0.225956492690824	0	-0.119664503756089	0	0	-0.298243860502889	0.640722343823129
1	Ajmaline	1	1500	7	10500	0.280821917808219	0.771739130434783	1	0.870848708487085	1	1	0.711538461538461	-1.27003455500403	-0.259108700007725	0	-0.138287015854091	0	0	-0.340325805937203	0.695855719604748
1	Ajmaline	1	1500	8	12000	0.254658385093168	0.747368421052632	1	0.855072463768116	1	1	0.683377308707124	-1.36783229828016	-0.291197014559225	0	-0.15656906069154	0	0	-0.380708143382889	0.744665293817276
1	Ajmaline	1	1500	9	13500	0.232954545454545	0.724489795918367	1	0.839857651245552	1	1	0.65736040609137	-1.45691192833384	-0.322287601629256	0	-0.174522864308136	0	0	-0.419522847598396	0.788309783805207
1	Ajmaline	1	1500	10	15000	0.214659685863874	0.702970297029703	1	0.825174825174825	1	1	0.633251833740831	-1.53870136134232	-0.352440639799944	0	-0.192160005794242	0	0	-0.456887094343264	0.827661546753253
1	Ajmaline	1	1500	11	16500	0.199029126213592	0.682692307692308	1	0.810996563573883	1	1	0.610849056603774	-1.61430410208527	-0.381711022100057	0	-0.209491462145882	0	0	-0.49290539353242	0.863393478386394
1	Ajmaline	1	1500	12	18000	0.18552036199095	0.663551401869159	1	0.797297297297297	1	1	0.58997722095672	-1.68459063481345	-0.410148957420591	0	-0.22652764929845	0	0	-0.527671351375634	0.89603528425129
1	Ajmaline	1	1500	13	19500	0.173728813559322	0.645454545454545	1	0.784053156146179	1	1	0.570484581497797	-1.7502597383213	-0.437800488751101	0	-0.243278459723266	0	0	-0.56126913634181	0.926011226401178
1	Ajmaline	1	1500	14	21000	0.163346613545817	0.628318584070796	1	0.771241830065359	1	1	0.552238805970149	-1.81188087242748	-0.464707941671025	0	-0.259753296926771	0	0	-0.593774706746742	0.953666211969976
1	Ajmaline	1	1500	15	22500	0.154135338345865	0.612068965517241	1	0.758842443729904	1	1	0.535123966942149	-1.86992424207739	-0.490910314065049	0	-0.275961107153624	0	0	-0.625256845017094	0.979284292887498
1	Ajmaline	1	1500	16	24000	0.145907473309609	0.596638655462185	1	0.746835443037975	1	1	0.519038076152305	-1.92478260262944	-0.516443616070214	0	-0.291910408561302	0	0	-0.655778034051981	1.00310207972977
1	Ajmaline	1	1500	17	25500	0.138513513513514	0.581967213114754	1	0.735202492211838	1	1	0.503891050583658	-1.97678738761975	-0.541341167691941	0	-0.307609318104406	0	0	-0.685395203755627	1.02531865963803
1	Ajmaline	1	1500	18	27000	0.131832797427653	0.568	1	0.723926380368098	1	1	0.489603024574669	-2.02622084547493	-0.565633860260986	0	-0.323065576341098	0	0	-0.714160370158762	1.04610305704175
1	Ajmaline	1	1500	19	28500	0.125766871165644	0.5546875	1	0.712990936555891	1	1	0.476102941176471	-2.0733253146624	-0.589350386878302	0	-0.338286570351453	0	0	-0.742121185156405	1.0655999328349
1	Ajmaline	1	1500	20	30000	0.120234604105572	0.541984732824427	1	0.702380952380952	1	1	0.463327370304115	-2.11831041057921	-0.612517446159836	0	-0.353279354937594	0	0	-0.769321411455561	1.08393399825364
1	Ajmaline	1	1500	21	31500	0.115168539325843	0.529850746268657	1	0.69208211143695	1	1	0.451219512195122	-2.16135866414772	-0.635159922909596	0	-0.368050672257907	0	0	-0.795801334620029	1.10121347598212
1	Ajmaline	1	1500	22	33000	0.110512129380054	0.518248175182482	1	0.682080924855491	1	1	0.439728353140917	-2.20262999590313	-0.65730104878681	0	-0.382606970032114	0	0	-0.821598121952049	1.11753284481278
1	Ajmaline	1	1500	23	34500	0.106217616580311	0.507142857142857	1	0.672364672364672	1	1	0.428807947019868	-2.24226530276052	-0.678962545567989	0	-0.396954418440256	0	0	-0.846746136235277	1.13297503853255
1	Ajmaline	1	1500	24	36000	0.102244389027431	0.496503496503497	1	0.662921348314607	1	1	0.418416801292407	-2.28038936060226	-0.700164753218592	0	-0.41109892582642	0	0	-0.871277210985058	1.14761322410053
1	Ajmaline	1	1500	25	37500	0.0985576923076923	0.486301369863014	1	0.653739612188366	1	1	0.408517350157729	-2.31711319355696	-0.720926744667021	0	-0.425046153307271	0	0	-0.895220892737688	1.16151225199179
1	Ajmaline	1	1500	26	39000	0.0951276102088167	0.476510067114094	1	0.644808743169399	1	1	0.399075500770416	-2.35253602339944	-0.741266428904144	0	-0.438801528375756	0	0	-0.918604655004552	1.17472984852324
1	Ajmaline	1	1500	27	40500	0.0919282511210762	0.467105263157895	1	0.636118598382749	1	1	0.390060240963855	-2.38674688531576	-0.761200643804961	0	-0.452370257581825	0	0	-0.941454087776896	1.18731760323711
1	Ajmaline	1	1500	28	42000	0.0889370932754881	0.458064516129032	1	0.627659574468085	1	1	0.381443298969072	-2.41982597629234	-0.780745239877931	0	-0.465757338364285	0	0	-0.963793065859158	1.19932179211122
1	Ajmaline	1	1500	29	43500	0.0861344537815126	0.449367088607595	1	0.619422572178478	1	1	0.373198847262248	-2.45184578752711	-0.799915155985651	0	-0.478967570101091	0	0	-0.985643898807267	1.21078406821521
1	Ajmaline	1	1500	30	45000	0.0835030549898167	0.440993788819876	1	0.61139896373057	1	1	0.365303244005642	-2.48287206109021	-0.818724487943148	0	-0.492005564439221	0	0	-1.00702746483259	1.22174204455484
1	Ajmaline	1	1500	31	46500	0.0810276679841897	0.432926829268293	1	0.603580562659846	1	1	0.357734806629834	-2.51296460258316	-0.837186550782883	0	-0.504875754959756	0	0	-1.02796333068618	1.2322297886267
1	Ajmaline	1	1500	32	48000	0.0786948176583493	0.425149700598802	1	0.595959595959596	1	1	0.350473612990528	-2.54217797504906	-0.85531393537544	0	-0.51758240622887	0	0	-1.04846985924866	1.24227824420754
2	Amiodarone	1	63.5	1	63.5	0.898155573376103	0.98694355916521	0.993306277341485	0.961608222490931	0.964790684779595	1	0.9833834881591	-0.107411981390896	-0.0131424254135127	-0.00671622609743199	-0.0391481643944379	-0.035844108135019	0	-0.0167561147095282	0.0556695675788695
2	Amiodarone	1	63.5	2	127	0.815138282387191	0.974223665516542	0.986701570680628	0.926055312954876	0.931976432779861	1	0.967310167310167	-0.204397508493154	-0.0261143656479807	-0.0133876452680197	-0.0768213129073056	-0.0704477513331479	0	-0.0332360828283372	0.105315211733221
2	Amiodarone	1	63.5	3	190.5	0.746169220519654	0.961827472197175	0.980184116086753	0.893037619314992	0.901320901320901	1	0.95175383056857	-0.292802867344322	-0.0389201872306589	-0.0200148514056349	-0.113126572100463	-0.103893923495716	0	-0.0494488589642251	0.150042796105811
2	Amiodarone	1	63.5	4	254	0.687960687960688	0.949742777997626	0.97375219592849	0.862293304418542	0.872617853560682	1	0.936689930209372	-0.374023582273345	-0.0515640910521573	-0.0265984266741864	-0.148159805847532	-0.136257558313209	0	-0.0654029691084157	0.190684096227251
2	Amiodarone	1	63.5	5	317.5	0.638176638176638	0.937957987298486	0.967404137364612	0.833595387840671	0.845686512758202	1	0.922095448411238	-0.449140171610826	-0.0640501206394623	-0.0331389418145025	-0.182007140819033	-0.16760654034265	0	-0.0811065375611013	0.227879905734278
2	Amiodarone	1	63.5	6	381	0.595111583421892	0.926462072958888	0.961138310893513	0.806746132386508	0.82036775106082	1	0.907948779898526	-0.519006355856185	-0.076382169918806	-0.0396369564412468	-0.214746242128483	-0.198002562356108	0	-0.0965673117753217	0.262133943393753
2	Amiodarone	1	63.5	7	444.5	0.557491289198606	0.915244541901039	0.954953128958703	0.781572481572482	0.796520943007553	1	0.894229625223082	-0.584308400525794	-0.0885639905056763	-0.046093019330246	-0.246447386687497	-0.227501856182916	0	-0.11179268530936	0.293849051180335
2	Amiodarone	1	63.5	8	508	0.52434456928839	0.904295403165034	0.948847044607794	0.757922325470574	0.774021352313167	1	0.880918893577121	-0.645606235790945	-0.100599198556116	-0.0525076686966023	-0.277174371584447	-0.256155818805007	0	-0.126789719057885	0.323352224981973
2	Amiodarone	1	63.5	9	571.5	0.494918250110473	0.893605138229545	0.942818550202611	0.735661424606846	0.752757949383517	1	0.867998614158679	-0.703362681344397	-0.112491281210615	-0.0588814324639453	-0.306985287009955	-0.284011551219706	0	-0.141565160914445	0.350912365326732
2	Amiodarone	1	63.5	10	635	0.468619246861925	0.883164673413063	0.936866176178167	0.714670860480791	0.732631578947368	1	0.85545185522422	-0.757964680636416	-0.124243602659328	-0.0652148285251538	-0.33593317726671	-0.311112324260167	0	-0.156125464002369	0.376753144467345
2	Amiodarone	1	63.5	11	698.5	0.44497417560588	0.872965354187506	0.930988489848343	0.694844910441241	0.713553413984007	1	0.843262650061708	-0.809739030846176	-0.135859409855007	-0.0715083649948758	-0.364066608763368	-0.337497982941533	0	-0.170476803597361	0.401062514581337
2	Amiodarone	1	63.5	12	762	0.423600605143722	0.862998921251348	0.925184094256259	0.676089266737513	0.695443645083933	1	0.83141592920354	-0.858964236682437	-0.147341837897928	-0.0777625404541499	-0.391430160270336	-0.363205298818282	0	-0.184625092852866	0.423999854517539
2	Amiodarone	1	63.5	13	825.5	0.404186214363046	0.853257488223269	0.919451627067376	0.658319536423841	0.678230364451374	1	0.819897458274245	-0.905879580573838	-0.158693915115144	-0.0839778441874265	-0.418064847865507	-0.388268278173445	0	-0.19857599742842	0.445701423696853
2	Amiodarone	1	63.5	14	889	0.386473429951691	0.843733520829671	0.913789759503491	0.641459971768502	0.661848611639407	1	0.808693780933936	-0.950692158591487	-0.169918567854665	-0.0901547564122671	-0.44400849473999	-0.412718432521307	0	-0.212334949111568	0.466284581189082
2	Amiodarone	1	63.5	15	952.5	0.370247933884297	0.834419817470665	0.908197195315888	0.625442390876917	0.646239554317549	1	0.797792166436684	-0.993582406175802	-0.181018625013539	-0.0962937485019929	-0.469296054232921	-0.436585016821969	0	-0.225907158515312	0.485851089881201
2	Amiodarone	1	63.5	16	1016	0.355329949238579	0.825309491059147	0.902672669795957	0.610205256090543	0.631349782293179	1	0.78718056137411	-1.03470848668863	-0.191996822317373	-0.102395283201542	-0.493959893018962	-0.459895239924974	0	-0.239297626925365	0.504489733130097
2	Amiodarone	1	63.5	17	1079.5	0.341567551082647	0.816395952036738	0.897214948821709	0.595692883895131	0.61713069693208	1	0.776847545219638	-1.07420981255551	-0.202855806367488	-0.108459814836781	-0.518030040205096	-0.482674451038662	0	-0.252511157364627	0.522278408106947
2	Amiodarone	1	63.5	18	1143	0.328831473869642	0.807672892478546	0.891822827938671	0.581854764953357	0.603537981269511	1	0.766782289328708	-1.11220989693349	-0.213598138470678	-0.114487789517505	-0.541534407145855	-0.504946305429828	0	-0.265552364936137	0.539285816131471
2	Amiodarone	1	63.5	19	1206.5	0.317011038777243	0.799134271206193	0.886495131473729	0.568644976760815	0.590531138639063	1	0.756974519085507	-1.14881868307	-0.224226298265448	-0.120479645334361	-0.564498982012761	-0.526732912069393	0	-0.278425686500238	0.555572839293389
2	Amiodarone	1	63.5	20	1270	0.306010928961749	0.790774299835255	0.881230711680539	0.556021674532424	0.578073089700997	1	0.747414478918059	-1.18413446210627	-0.234742687157562	-0.1264358125499	-0.586948002519385	-0.548054965534347	0	-0.291135389736727	0.571193670451143
2	Amiodarone	1	63.5	21	1333.5	0.295748613678373	0.782587429689411	0.876028447915214	0.543946648426813	0.566129819424109	1	0.738092899931258	-1.21824546361265	-0.245149631576824	-0.132356713783983	-0.60890410968047	-0.568931864138489	0	-0.30368558163831	0.58619674757657
2	Amiodarone	1	63.5	22	1397	0.286152273888605	0.774568339519122	0.870887245841035	0.532384937238494	0.554670066942939	1	0.729000969932105	-1.25123118366688	-0.255449386066125	-0.138242764193716	-0.630388485050567	-0.589381815982103	0	-0.31608021647765	0.60062553156621
2	Amiodarone	1	63.5	23	1460.5	0.277159119029943	0.766711923967734	0.865806036661001	0.521304490331039	0.543665052335573	1	0.720130305643384	-1.28316350078933	-0.26564413621302	-0.144094371648135	-0.651420973527471	-0.609421934373483	0	-0.328323103286696	0.614519157833132
2	Amiodarone	1	63.5	24	1524	0.268714011516315	0.759013282732448	0.86078377637709	0.510675870926312	0.533088235294118	1	0.711472926921621	-1.31410761914406	-0.27573600143338	-0.149911936897801	-0.672020193505001	-0.629068323875423	0	-0.340417912883667	0.627912985377585
2	Amiodarone	1	63.5	25	1587.5	0.260768335273574	0.75146771037182	0.855819445075156	0.500471994965387	0.522915101427498	1	0.703021232812646	-1.34412287012922	-0.285727037615978	-0.155695853739491	-0.692203635907462	-0.648336158060692	0	-0.352368184480144	0.640839062016256
2	Amiodarone	1	63.5	26	1651	0.253279059249209	0.744070686715238	0.850912046234423	0.490667900663273	0.513122972574462	1	0.69476797929377	-1.37326339712825	-0.295619239636259	-0.161446509176156	-0.711987753425852	-0.667239749917064	0	-0.364177331898016	0.653326520608006
2	Amiodarone	1	63.5	27	1714.5	0.246207957792921	0.736817867833295	0.846060606060606	0.481240544629349	0.503690838037343	1	0.686706258565555	-1.40157874328086	-0.305414543747004	-0.167164283572309	-0.731388041096588	-0.685792615720275	0	-0.375848649423607	0.665401918147469
2	Amiodarone	1	63.5	28	1778	0.239520958083832	0.729705077531165	0.841264172841711	0.472168621047944	0.494599204093235	1	0.678829479768786	-1.42911435830282	-0.31511482985302	-0.172849550804983	-0.750419109211516	-0.704007533088929	0	-0.387385317324095	0.677089527289003
2	Amiodarone	1	63.5	29	1841.5	0.233187591088903	0.722728299329971	0.836521816325625	0.463432400932401	0.48582995951417	1	0.671131351013483	-1.45591203737568	-0.324721923676576	-0.178502678410441	-0.769094749418654	-0.721896593845931	0	-0.398790407049338	0.688411588052861
2	Amiodarone	1	63.5	30	1905	0.227180527383367	0.715883668903803	0.831832627118644	0.455013588900014	0.477366255144033	1	0.663605862616987	-1.4820103027476	-0.334237598819797	-0.184124027726745	-0.787427994762841	-0.739471252234184	0	-0.410066886140394	0.699388526035386
2	Amiodarone	1	63.5	31	1968.5	0.221475182914772	0.709167466942454	0.827195716104113	0.446895195279573	0.469192395847378	1	0.65624727145726	-1.50744473679084	-0.343663578729859	-0.189713954032349	-0.805431174320994	-0.756742368968038	0	-0.42121762286436	0.710039142308119
2	Amiodarone	1	63.5	32	2032	0.216049382716049	0.702576112412178	0.822610213880402	0.439061421670117	0.461293743372216	1	0.649050086355786	-1.53224827374297	-0.353001538572424	-0.19527280668084	-0.823115963005639	-0.773720251544774	0	-0.43224539059363	0.720380779281026
3	Astemizole	1	0.3	1	0.3	0.952380952380952	0.999869582228405	1	0.999712698716721	1	1	1	-0.0487901641694321	-0.000130426276732122	0	-0.00028734256219923	0	0	0	0.0298751210288235
3	Astemizole	1	0.3	2	0.6	0.909090909090909	0.999739198469964	1	0.999425562470081	1	1	1	-0.0953101798043249	-0.000260835544668812	0	-0.000574602582367834	0	0	0	0.0583518779666119
3	Astemizole	1	0.3	3	0.9	0.869565217391304	0.999608848711374	1	0.999138591117917	1	1	1	-0.139761942375159	-0.000391227808245992	0	-0.000861780107913832	0	0	0	0.0855546387686114
3	Astemizole	1	0.3	4	1.2	0.833333333333333	0.999478532939336	1	0.998851784518228	1	1	1	-0.182321556793955	-0.000521603071897347	0	-0.00114887518620544	0	0	0	0.111591884358169
3	Astemizole	1	0.3	5	1.5	0.8	0.999348251140561	1	0.998565142529175	1	1	1	-0.22314355131421	-0.000651961340054988	0	-0.00143588786456879	0	0	0	0.136558804396921
3	Astemizole	1	0.3	6	1.8	0.769230769230769	0.999218003301764	1	0.998278665009085	1	1	1	-0.262364264467491	-0.000782302617149675	0	-0.00172281819029026	0	0	0	0.160539383644028
3	Astemizole	1	0.3	7	2.1	0.740740740740741	0.999087789409669	1	0.997992351816444	1	1	1	-0.300104592450338	-0.000912626907609807	0	-0.00200966621061556	0	0	0	0.183608094351611
3	Astemizole	1	0.3	8	2.4	0.714285714285714	0.998957609451008	1	0.997706202809902	1	1	1	-0.336472236621213	-0.0010429342158622	0	-0.00229643197274893	0	0	0	0.205831280727045
3	Astemizole	1	0.3	9	2.7	0.689655172413793	0.998827463412516	1	0.997420217848271	1	1	1	-0.371563556432483	-0.00117322454633264	0	-0.00258311552385458	0	0	0	0.227268300342509
3	Astemizole	1	0.3	10	3	0.666666666666667	0.998697351280938	1	0.997134396790524	1	1	1	-0.405465108108164	-0.00130349790344421	0	-0.00286971691105654	0	0	0	0.247972471963328
3	Astemizole	1	0.3	11	3.3	0.645161290322581	0.998567273043025	1	0.996848739495798	1	1	1	-0.438254930931155	-0.00143375429161861	0	-0.00315623618143744	0	0	0	0.2679918679033
3	Astemizole	1	0.3	12	3.6	0.625	0.998437228685536	1	0.996563245823389	1	1	1	-0.470003629245736	-0.00156399371527618	0	-0.00344267338204014	0	0	0	0.287369980540249
3	Astemizole	1	0.3	13	3.9	0.606060606060606	0.998307218195234	1	0.996277915632754	1	1	1	-0.500775287912489	-0.00169421617883522	0	-0.0037290285598666	0	0	0	0.306146286237956
3	Astemizole	1	0.3	14	4.2	0.588235294117647	0.998177241558893	1	0.995992748783513	1	1	1	-0.53062825106217	-0.00182442168671206	0	-0.00401530176187889	0	0	0	0.324356725059984
3	Astemizole	1	0.3	15	4.5	0.571428571428571	0.998047298763289	1	0.995707745135444	1	1	1	-0.559615787935423	-0.00195461024332189	0	-0.00430149303499857	0	0	0	0.342034110928189
3	Astemizole	1	0.3	16	4.8	0.555555555555556	0.99791738979521	1	0.995422904548489	1	1	1	-0.587786664902119	-0.00208478185307772	0	-0.00458760242610673	0	0	0	0.359208483987689
3	Astemizole	1	0.3	17	5.1	0.54054054054054	0.997787514641447	1	0.995138226882746	1	1	1	-0.615185639090234	-0.00221493652039074	0	-0.00487362998204436	0	0	0	0.37590741468317
3	Astemizole	1	0.3	18	5.4	0.526315789473684	0.9976576732888	1	0.994853711998475	1	1	1	-0.641853886172395	-0.00234507424967106	0	-0.00515957574961261	0	0	0	0.392156267276197
3	Astemizole	1	0.3	19	5.7	0.512820512820513	0.997527865724075	1	0.994569359756098	1	1	1	-0.667829372575656	-0.00247519504532661	0	-0.00544543977557182	0	0	0	0.407978429127123
3	Astemizole	1	0.3	20	6	0.5	0.997398091934085	1	0.994285170016192	1	1	1	-0.693147180559945	-0.00260529891176314	0	-0.00573122210664302	0	0	0	0.42339551094402
3	Astemizole	1	0.3	21	6.3	0.487804878048781	0.99726835190565	1	0.994001142639497	1	1	1	-0.717839793150317	-0.00273538585338589	0	-0.00601692278950619	0	0	0	0.438427522301473
3	Astemizole	1	0.3	22	6.6	0.476190476190476	0.997138645625596	1	0.993717277486911	1	1	1	-0.741937344729377	-0.00286545587459734	0	-0.0063025418708023	0	0	0	0.45309302600598
3	Astemizole	1	0.3	23	6.9	0.465116279069767	0.997008973080758	1	0.99343357441949	1	1	1	-0.765467842139571	-0.00299550897979834	0	-0.00658807939713211	0	0	0	0.467409274295374
3	Astemizole	1	0.3	24	7.2	0.454545454545455	0.996879334257975	1	0.993150033298449	1	1	1	-0.78845736036427	-0.00312554517338888	0	-0.00687353541505592	0	0	0	0.481392329378733
3	Astemizole	1	0.3	25	7.5	0.444444444444444	0.996749729144095	1	0.992866653985163	1	1	1	-0.810930216216329	-0.00325556445976619	0	-0.00715890997109487	0	0	0	0.495057170428856
3	Astemizole	1	0.3	26	7.8	0.434782608695652	0.996620157725973	1	0.992583436341162	1	1	1	-0.832909122935104	-0.0033855668433264	0	-0.00744420311173008	0	0	0	0.508417788814314
3	Astemizole	1	0.3	27	8.1	0.425531914893617	0.996490619990468	1	0.992300380228137	1	1	1	-0.854415328156067	-0.00351555232846344	0	-0.00772941488340239	0	0	0	0.521487273088984
3	Astemizole	1	0.3	28	8.4	0.416666666666667	0.99636111592445	1	0.992017485507935	1	1	1	-0.8754687373539	-0.00364552091957038	0	-0.00801454533251388	0	0	0	0.53427788503323
3	Astemizole	1	0.3	29	8.7	0.408163265306122	0.996231645514792	1	0.991734752042561	1	1	1	-0.896088024556636	-0.00377547262103759	0	-0.00829959450542591	0	0	0	0.546801127854018
3	Astemizole	1	0.3	30	9	0.4	0.996102208748376	1	0.991452179694178	1	1	1	-0.916290731874155	-0.00390540743725426	0	-0.00858456244846082	0	0	0	0.559067807494653
3	Astemizole	1	0.3	31	9.3	0.392156862745098	0.99597280561209	1	0.991169768325104	1	1	1	-0.936093359170335	-0.004035325372608	0	-0.00886944920790166	0	0	0	0.57108808787299
3	Astemizole	1	0.3	32	9.6	0.384615384615385	0.99584343609283	1	0.990887517797817	1	1	1	-0.955511445027436	-0.00416522643148433	0	-0.00915425482999099	0	0	0	0.582871540755648
4	Azimilide	1	70	1	70	0.888888888888889	0.952380952380952	1	0.990752972258917	0.952380952380952	1	1	-0.117783035656384	-0.0487901641694321	0	-0.00929004690709275	-0.0487901641694321	0	0	0.0877156393255592
4	Azimilide	1	70	2	140	0.8	0.909090909090909	1	0.981675392670157	0.909090909090909	1	1	-0.22314355131421	-0.0953101798043249	0	-0.0184945826361643	-0.0953101798043249	0	0	0.166856695005358
4	Azimilide	1	70	3	210	0.727272727272727	0.869565217391304	1	0.972762645914397	0.869565217391304	1	1	-0.318453731118535	-0.139761942375159	0	-0.0276151670329734	-0.139761942375159	0	0	0.238970241244551
4	Azimilide	1	70	4	280	0.666666666666667	0.833333333333333	1	0.964010282776349	0.833333333333333	1	1	-0.405465108108164	-0.182321556793955	0	-0.0366533176480356	-0.182321556793955	0	0	0.305209971012863
4	Azimilide	1	70	5	350	0.615384615384615	0.8	1	0.955414012738854	0.8	1	1	-0.485507815781701	-0.22314355131421	0	-0.0456105112520523	-0.22314355131421	0	0	0.366460745675532
4	Azimilide	1	70	6	420	0.571428571428571	0.769230769230769	1	0.946969696969697	0.769230769230769	1	1	-0.559615787935423	-0.262364264467491	0	-0.0544881852840698	-0.262364264467491	0	0	0.423417173213849
4	Azimilide	1	70	7	490	0.533333333333333	0.740740740740741	1	0.938673341677096	0.740740740740741	1	1	-0.628608659422374	-0.300104592450338	0	-0.0632877392359184	-0.300104592450338	0	0	0.47663523927745
4	Azimilide	1	70	8	560	0.5	0.714285714285714	1	0.930521091811414	0.714285714285714	1	1	-0.693147180559945	-0.336472236621213	0	-0.0720105359762722	-0.336472236621213	0	0	0.526567407766934
4	Azimilide	1	70	9	630	0.470588235294118	0.689655172413793	1	0.922509225092251	0.689655172413793	1	1	-0.75377180237638	-0.371563556432483	0	-0.0806579030174545	-0.371563556432483	0	0	0.573587185063504
4	Azimilide	1	70	10	700	0.444444444444444	0.666666666666667	1	0.914634146341463	0.666666666666667	1	1	-0.810930216216329	-0.405465108108164	0	-0.0892311337279426	-0.405465108108164	0	0	0.618006745082568
4	Azimilide	1	70	11	770	0.421052631578947	0.645161290322581	1	0.90689238210399	0.645161290322581	1	1	-0.864997437486605	-0.438254930931155	0	-0.0977314884933353	-0.438254930931155	0	0	0.660089853052074
4	Azimilide	1	70	12	840	0.4	0.625	1	0.899280575539568	0.625	1	1	-0.916290731874155	-0.470003629245736	0	-0.106160195828391	-0.470003629245736	0	0	0.700061524467864
4	Azimilide	1	70	13	910	0.380952380952381	0.606060606060606	1	0.89179548156956	0.606060606060606	1	1	-0.965080896043587	-0.500775287912489	0	-0.114518453442592	-0.500775287912489	0	0	0.73811536684422
4	Azimilide	1	70	14	980	0.363636363636364	0.588235294117647	1	0.884433962264151	0.588235294117647	1	1	-1.01160091167848	-0.53062825106217	0	-0.122807429261547	-0.53062825106217	0	0	0.774419244709277
4	Azimilide	1	70	15	1050	0.347826086956522	0.571428571428571	1	0.87719298245614	0.571428571428571	1	1	-1.05605267424931	-0.559615787935423	0	-0.131028262406404	-0.559615787935423	0	0	0.809119710121255
4	Azimilide	1	70	16	1120	0.333333333333333	0.555555555555556	1	0.870069605568445	0.555555555555556	1	1	-1.09861228866811	-0.587786664902119	0	-0.139182064133337	-0.587786664902119	0	0	0.842345510082785
4	Azimilide	1	70	17	1190	0.32	0.54054054054054	1	0.863060989643268	0.54054054054054	1	1	-1.13943428318836	-0.615185639090234	0	-0.147269918735036	-0.615185639090234	0	0	0.874210393921825
4	Azimilide	1	70	18	1260	0.307692307692308	0.526315789473684	1	0.856164383561644	0.526315789473684	1	1	-1.17865499634165	-0.641853886172395	0	-0.155292884406035	-0.641853886172395	0	0	0.904815382983489
4	Azimilide	1	70	19	1330	0.296296296296296	0.512820512820513	1	0.849377123442809	0.512820512820513	1	1	-1.21639532432449	-0.667829372575655	0	-0.163251994073604	-0.667829372575655	0	0	0.934250622491275
4	Azimilide	1	70	20	1400	0.285714285714286	0.5	1	0.842696629213483	0.5	1	1	-1.25276296849537	-0.693147180559945	0	-0.171148256195829	-0.693147180559945	0	0	0.962596905237403
4	Azimilide	1	70	21	1470	0.275862068965517	0.487804878048781	1	0.836120401337793	0.487804878048781	1	1	-1.28785428830664	-0.717839793150317	0	-0.17898265552844	-0.717839793150317	0	0	0.989926934984067
4	Azimilide	1	70	22	1540	0.266666666666667	0.476190476190476	1	0.829646017699115	0.476190476190476	1	1	-1.32175583998232	-0.741937344729377	0	-0.18675615386182	-0.741937344729377	0	0	1.01630638154198
4	Azimilide	1	70	23	1610	0.258064516129032	0.465116279069767	1	0.823271130625686	0.465116279069767	1	1	-1.35454566280531	-0.765467842139571	0	-0.194469690729602	-0.765467842139571	0	0	1.04179476771807
4	Azimilide	1	70	24	1680	0.25	0.454545454545455	1	0.816993464052288	0.454545454545455	1	1	-1.38629436111989	-0.78845736036427	0	-0.202124184090134	-0.78845736036427	0	0	1.06644621951361
4	Azimilide	1	70	25	1750	0.242424242424242	0.444444444444444	1	0.810810810810811	0.444444444444444	1	1	-1.41706601978664	-0.810930216216329	0	-0.209720530982069	-0.810930216216329	0	0	1.09031010429202
4	Azimilide	1	70	26	1820	0.235294117647059	0.434782608695652	1	0.804721030042919	0.434782608695652	1	1	-1.44691898293633	-0.832909122935104	0	-0.217259608155235	-0.832909122935104	0	0	1.11343157654797
4	Azimilide	1	70	27	1890	0.228571428571429	0.425531914893617	1	0.798722044728435	0.425531914893617	1	1	-1.47590651980958	-0.854415328156068	0	-0.224742272677907	-0.854415328156068	0	0	1.13585204698898
4	Azimilide	1	70	28	1960	0.222222222222222	0.416666666666667	1	0.792811839323467	0.416666666666667	1	1	-1.50407739677627	-0.8754687373539	0	-0.232169362521522	-0.8754687373539	0	0	1.15760958759377
4	Azimilide	1	70	29	2030	0.216216216216216	0.408163265306122	1	0.786988457502623	0.408163265306122	1	1	-1.53147637096439	-0.896088024556636	0	-0.239541697123846	-0.896088024556636	0	0	1.17873928292418
4	Azimilide	1	70	30	2100	0.210526315789474	0.4	1	0.78125	0.4	1	1	-1.55814461804655	-0.916290731874155	0	-0.246860077931526	-0.916290731874155	0	0	1.19927353608307
4	Azimilide	1	70	31	2170	0.205128205128205	0.392156862745098	1	0.77559462254395	0.392156862745098	1	1	-1.58412010444981	-0.936093359170335	0	-0.254125288922938	-0.936093359170335	0	0	1.21924233621268
4	Azimilide	1	70	32	2240	0.2	0.384615384615385	1	0.770020533880904	0.384615384615385	1	1	-1.6094379124341	-0.955511445027436	0	-0.261338097112179	-0.955511445027436	0	0	1.23867349322892
5	Azithromycin	1	1937	1	1937	0.973368347242655	1	0.989862088817942	1	0.995896777582891	1	0.978644116382399	-0.026992699840431	0	-0.0101896497815375	0	-0.00411166373318938	0	-0.0215872200249054	0.0162420392148473
5	Azithromycin	1	1937	2	3874	0.948118387571983	1	0.979927669143325	1	0.991827090431536	1	0.958181307886612	-0.053275903119103	0	-0.020276517037997	0	-0.00820649089044015	0	-0.0427182622514502	0.0320615057673553
5	Azithromycin	1	1937	3	5811	0.924145313091493	1	0.970190675031677	1	0.987790529098083	1	0.938556701030928	-0.0788859544548024	0	-0.0302626546048867	0	-0.0122846187955558	0	-0.0634120081253619	0.0474804133235709
5	Azithromycin	1	1937	4	7748	0.901354654715828	1	0.960645279262074	1	0.983786690773187	1	0.919719827586207	-0.103856475387189	0	-0.0401500544245803	0	-0.0163461830990839	0	-0.0836861905517052	0.062519110273704
5	Azithromycin	1	1937	5	9685	0.879661038008971	1	0.951285881707937	1	0.979815179152008	1	0.901624191205599	-0.128218629793043	0	-0.049940649931115	0	-0.0203913178053916	0	-0.103557485199491	0.0771964427368176
5	Azithromycin	1	1937	6	11622	0.858987114465287	1	0.942107098381071	1	0.97587560430345	1	0.884226884226884	-0.152001357732876	0	-0.0596363183193744	0	-0.0244201552991939	0	-0.12304159290985	0.0915298981427593
5	Azithromycin	1	1937	7	13559	0.839262640033193	1	0.933103751103919	1	0.971967582542537	1	0.867488247998984	-0.175231582129431	0	-0.0692388827053168	0	-0.0284328263715505	0	-0.142153314228119	0.105535732101271
5	Azithromycin	1	1937	8	15496	0.82042367774533	1	0.924270857768395	1	0.968090736305848	1	0.851371571072319	-0.19793439197985	0	-0.0787501141834674	0	-0.032429460245342	0	-0.160906616946229	0.119229080837281
5	Azithromycin	1	1937	9	17433	0.802411905382584	1	0.915603623142801	1	0.964244694029912	1	0.835842820418656	-0.220133205227901	0	-0.0881717337874826	0	-0.0364101846002418	0	-0.179314697427538	0.132624061117014
5	Azithromycin	1	1937	10	19370	0.785174012377171	1	0.907097430191177	1	0.960429090032503	1	0.820870401538832	-0.241849913947244	0	-0.0975054143592138	0	-0.0403751255971899	0	-0.197390036388526	0.145733859296785
5	Azithromycin	1	1937	11	21307	0.768661172817389	1	0.898747831872075	1	0.956643564396729	1	0.806424943899847	-0.263105014092158	0	-0.106752782331349	0	-0.0443244079023849	0	-0.215144449727946	0.158570810883378
5	Azithromycin	1	1937	12	23244	0.752828583581455	1	0.890550543386134	1	0.952887762857867	1	0.792479108635098	-0.283917721743361	0	-0.115915419428382	0	-0.0482581547108035	0	-0.232589134921893	0.171146471792419
5	Azithromycin	1	1937	13	25181	0.737635058399408	1	0.88250143484408	1	0.949161336692832	1	0.779007415858528	-0.304306077501324	0	-0.124994864290364	0	-0.0521764877692605	0	-0.249734713441004	0.183471682321709
5	Azithromycin	1	1937	14	27118	0.72304267009825	1	0.874596524328774	1	0.945463942612253	1	0.765986089297734	-0.324287040448345	0	-0.133992614023592	0	-0.056079527399017	0	-0.26659126959217	0.195556624714134
5	Azithromycin	1	1937	15	29055	0.709016434487386	1	0.866831971326822	1	0.941795242655042	1	0.753392916252897	-0.343876572905701	0	-0.142910125682166	0	-0.0599673925179506	0	-0.28316838614045	0.207410875064738
5	Azithromycin	1	1937	16	30992	0.695524030337564	1	0.859204070506996	1	0.938154904085424	1	0.741207121146331	-0.3630897170472	0	-0.151748817684061	0	-0.0638402006622946	0	-0.299475177026245	0.219043450224982
5	Azithromycin	1	1937	17	32929	0.682535550735117	1	0.85170924582427	1	0.934542599292331	1	0.729409251148382	-0.381940664290424	0	-0.160510071165165	0	-0.0676980680079603	0	-0.315520317457413	0.230462850270965
5	Azithromycin	1	1937	18	34866	0.670023281785315	1	0.844344044929775	1	0.930958005691123	1	0.717981072555205	-0.400442818267549	0	-0.169195231274514	0	-0.0715411093914472	0	-0.331312071625105	0.241677097028906
5	Azithromycin	1	1937	19	36803	0.65796150521845	1	0.837105133868305	1	0.927400805627557	1	0.706905476757428	-0.418608852075693	0	-0.17780560841377	0	-0.0753694383303546	0	-0.346858318264965	0.252693769088415
5	Azithromycin	1	1937	20	38740	0.646326321939819	1	0.829989292046272	1	0.92387068628395	1	0.696166394779772	-0.436450760419267	0	-0.186342479423783	0	-0.0791831670435001	0	-0.362166574261661	0.263520033680225
5	Azithromycin	1	1937	21	40677	0.63509549397612	1	0.822993407454146	1	0.920367339587477	1	0.685748719493823	-0.453979907181656	0	-0.194807088720934	0	-0.0829824064706593	0	-0.377244016473753	0.274162675748849
5	Azithromycin	1	1937	22	42614	0.624248302618817	1	0.816114472128488	1	0.916890462120547	1	0.675638234712052	-0.471207068898732	0	-0.20320064938579	0	-0.0867672662919282	0	-0.392097501937523	0.284628124510659
5	Azithromycin	1	1937	23	44551	0.613765420860534	1	0.809349577839686	1	0.913439755033205	1	0.665821550463189	-0.488142474550706	0	-0.211524344206448	0	-0.0905378549467229	0	-0.40673358659215	0.294922477753477
5	Azithromycin	1	1937	24	46488	0.603628798472085	1	0.802695911992394	1	0.9100149239575	1	0.656286043829296	-0.504795842040229	0	-0.21977932667881	0	-0.0942942796524218	0	-0.421158542654211	0.305051524103828
5	Azithromycin	1	1937	25	48425	0.593821558282517	1	0.796150753726537	1	0.906615678923781	1	0.647019804794845	-0.521176411682482	0	-0.227966721965917	0	-0.0980366464226583	0	-0.435378374756759	0.315020763462085
5	Azithromycin	1	1937	26	50362	0.584327902408425	1	0.789711470207524	1	0.903241734278847	1	0.638011586619323	-0.537292976996233	0	-0.236087627818321	0	-0.101765060085274	0	-0.449398834956919	0.324835425783075
5	Azithromycin	1	1937	27	52299	0.57513302733661	1	0.783375513095056	1	0.899892808605938	1	0.62925076029859	-0.553153913052752	0	-0.244143115457387	0	-0.105479624299937	0	-0.463225436705876	0.334500488360022
5	Azithromycin	1	1937	28	54236	0.566223046899994	1	0.777140415180553	1	0.896568624646478	1	0.620727272727273	-0.568767202611385	0	-0.252134230423305	0	-0.109180441575436	0	-0.476863467866176	0.344020691752381
5	Azithromycin	1	1937	29	56173	0.557584922303869	1	0.771003787183909	1	0.893268909223567	1	0.612431608215984	-0.584140460245987	0	-0.260061993389485	0	-0.112867613286651	0	-0.49031800285324	0.353400554482992
5	Azithromycin	1	1937	30	58110	0.549206398460894	1	0.764963314700815	1	0.889993393167134	1	0.604354753053638	-0.599280954644727	0	-0.26792740094492	0	-0.11654123969122	0	-0.503593913970876	0.362644386616678
5	Azithromycin	1	1937	31	60047	0.541075945981061	1	0.759016755292465	1	0.886741811240753	1	0.596488162837425	-0.614195629246777	0	-0.275731426346023	0	-0.120201419945893	0	-0.516695882004145	0.371756302320663
5	Azithromycin	1	1937	32	61984	0.533182708239193	1	0.753161935709962	1	0.883513902070041	1	0.58882373232149	-0.628891121362506	0	-0.283475020239359	0	-0.123848252122594	0	-0.529628406127215	0.380740231496866
6	Bepridil	1	33	1	33	0.717948717948718	0.984528832630098	0.982133188955062	0.976971388695045	0.994705599229905	1	0.996174800046366	-0.331357135954442	-0.0155920947598363	-0.018028349524158	-0.0232979122248218	-0.0053084657756677	0	-0.00383253474163848	0.188018338051563
6	Bepridil	1	33	2	66	0.56	0.969529085872576	0.964893617021277	0.954979536152797	0.989466964570699	1	0.992378752886836	-0.579818495252942	-0.0309448038494215	-0.0357374251489128	-0.0460653668432468	-0.0105889004789542	0	-0.00765043722154037	0.325359890220895
6	Bepridil	1	33	3	99	0.459016393442623	0.954979536152797	0.948248823836905	0.933955970647098	0.98428321955866	1	0.988611526515587	-0.778669353998107	-0.0460653668432468	-0.053138338765171	-0.0683259824992478	-0.015841598588746	0	-0.011453818744124	0.432511455687927
6	Bepridil	1	33	4	132	0.388888888888889	0.940860215053763	0.932168550873587	0.913838120104439	0.979153506001263	1	0.984872793949118	-0.944461608840851	-0.0609606997896873	-0.0702416320708684	-0.0901018346971866	-0.0210668499677198	0	-0.0152427893486144	0.51965312440179
6	Bepridil	1	33	5	165	0.337349397590361	0.927152317880795	0.916624557857504	0.894568690095847	0.974076983503535	1	0.981162233131636	-1.08663609762139	-0.07563741420562	-0.0870573149274838	-0.111413587370904	-0.0262649399583239	0	-0.0190174578281486	0.592585554123096
6	Bepridil	1	33	6	198	0.297872340425532	0.913838120104439	0.901590457256461	0.876095118898623	0.969052829009065	1	0.977479526842584	-1.2110902720948	-0.0901018346971866	-0.103594900544548	-0.13228061072287	-0.0314361494762804	0	-0.0227779317485168	0.654927582358113
6	Bepridil	1	33	7	231	0.266666666666667	0.900900900900901	0.887041564792176	0.858369098712446	0.964080236355155	1	0.973824362606232	-1.32175583998232	-0.104360015324243	-0.11986343780182	-0.152721087017664	-0.0365807551016803	0	-0.0265243174665572	0.709087983837916
6	Bepridil	1	33	8	264	0.241379310344828	0.888324873096447	0.872954764196343	0.841346153846154	0.959158415841584	1	0.970196432603296	-1.42138568093116	-0.118417754814474	-0.135871540984091	-0.172752105777804	-0.0416990291677483	0	-0.0302567201482031	0.75675014642979
6	Bepridil	1	33	9	297	0.220472440944882	0.876095118898623	0.859308384651824	0.824985268120212	0.954286593812529	1	0.966595433584524	-1.51198257628339	-0.13228061072287	-0.151627417173239	-0.192389749630876	-0.046791239847348	0	-0.0339752437861986	0.799136110030502
6	Bepridil	1	33	10	330	0.202898550724638	0.864197530864198	0.846082089552239	0.809248554913295	0.949464012251149	1	0.963021066786195	-1.595049174982	-0.14595391262308	-0.167138891515611	-0.211649171888475	-0.0518576512372939	0	-0.0376799912174827	0.837160492207035
6	Bepridil	1	33	11	363	0.187919463087248	0.852618757612667	0.833256775378962	0.794100964265457	0.944689928386409	1	0.959473037847493	-1.67174179577026	-0.159442774409024	-0.182413430559466	-0.23054466679452	-0.0568985234405398	0	-0.041371064140255	0.871525181806884
6	Bepridil	1	33	12	396	0.175	0.841346153846154	0.820814479638009	0.779510022271715	0.939963614311704	1	0.9559510567297	-1.74296930505862	-0.172752105777804	-0.197458163836717	-0.249089733258795	-0.0619141126463067	0	-0.0450485631307255	0.902780203522124
6	Bepridil	1	33	13	429	0.16374269005848	0.830367734282325	0.808738296923763	0.765445598687807	0.935284356614874	1	0.952454837637149	-1.80945904632746	-0.185886622958451	-0.212279903845126	-0.267297132787516	-0.0669046712082086	0	-0.0487125876595603	0.931364290104656
6	Bepridil	1	33	14	462	0.153846153846154	0.819672131147541	0.79701230228471	0.75187969924812	0.930651456019214	1	0.948984098939929	-1.87180217690159	-0.198850858745165	-0.22688516457114	-0.285178942233662	-0.071870447720442	0	-0.0523632361080237	0.957632773031647
6	Bepridil	1	33	15	495	0.145077720207254	0.809248554913295	0.785621481160676	0.738786279683377	0.926064227035101	1	0.945538563098251	-1.93048567872968	-0.211649171888475	-0.241280178679414	-0.302746601913177	-0.07681168709209	0	-0.05600060578383	0.981877267512297
6	Bepridil	1	33	16	528	0.137254901960784	0.799086757990868	0.774551665243382	0.726141078838174	0.921521997621879	1	0.942117956588468	-1.98591548366901	-0.224285755892987	-0.255470913482581	-0.320010959567141	-0.0817286306196011	0	-0.0596247929367052	1.00433988686843
6	Bepridil	1	33	17	561	0.130232558139535	0.789177001127396	0.763789473684211	0.71392146863845	0.917024108859636	1	0.938722009830694	-2.03843351795246	-0.236764647266175	-0.26946308579366	-0.336982310592996	-0.0866215160574951	0	-0.0632358927736707	1.02522371368872
6	Bepridil	1	33	18	594	0.123893805309735	0.779510022271715	0.753322259136213	0.702106318956871	0.912569914630556	1	0.93535045711798	-2.08833048909708	-0.249089733258795	-0.28326217575363	-0.353670434918434	-0.0914905776873462	0	-0.0668339994740484	1.04470065063456
6	Bepridil	1	33	19	627	0.118143459915612	0.77007700770077	0.74313805817288	0.690675875678342	0.908158781309506	1	0.932003036547012	-2.13585563095993	-0.261264759134074	-0.296873439717878	-0.37008463084865	-0.0963360463850973	0	-0.0704192062042009	1.06291739955008
6	Bepridil	1	33	20	660	0.112903225806452	0.760869565217391	0.73322554567502	0.679611650485437	0.903790087463557	1	0.928679489950292	-2.18122423598978	-0.273293334999681	-0.310301922277351	-0.386233746180277	-0.101158149686748	0	-0.0739916051320044	1.08000007937224
6	Bepridil	1	33	21	693	0.108108108108108	0.75187969924812	0.723573992820104	0.668896321070234	0.899463223560133	1	0.925379562829762	-2.22462355152433	-0.285178942233662	-0.323552467483211	-0.40212620684265	-0.105957111852469	0	-0.077551287441068	1.0960578380041
6	Bepridil	1	33	22	726	0.103703703703704	0.743099787685775	0.714173228346457	0.658513640639699	0.895177591683511	1	0.922103004291846	-2.26621744882317	-0.296924939532958	-0.3366297293375	-0.417770043298543	-0.110733153929184	0	-0.0810983433446964	1.11118570974653
6	Bepridil	1	33	23	759	0.099644128113879	0.734522560335782	0.70501360279829	0.648448355720241	0.890932605259376	1	0.918849566983855	-2.30615015915854	-0.308534568610797	-0.349538181606662	-0.433172914911457	-0.115486493811667	0	-0.0846328620996106	1.12546689945025
6	Bepridil	1	33	24	792	0.0958904109589041	0.726141078838174	0.696085955487337	0.638686131386861	0.886727688787185	1	0.915619007031749	-2.34454929209308	-0.320010959567141	-0.362282127009709	-0.448342132464556	-0.120217346302188	0	-0.0881549320194225	1.13897462578096
6	Bepridil	1	33	25	825	0.0924092409240924	0.717948717948718	0.687381583933308	0.629213483146067	0.882562277580071	1	0.912411083979191	-2.38152829533416	-0.331357135954442	-0.374865705828242	-0.463284678996991	-0.124925923168764	0	-0.0916646404878767	1.15177362166865
6	Bepridil	1	33	26	858	0.089171974522293	0.709939148073022	0.678892215568862	0.620017714791851	0.878435817512043	1	0.909225560727888	-2.41718847573305	-0.342576019559231	-0.387292903981454	-0.478007229106257	-0.129612433202033	0	-0.0951620739718581	1.16392136549312
6	Bepridil	1	33	27	891	0.0861538461538462	0.702106318956871	0.670609981515712	0.611086861632475	0.874347764772246	1	0.906062203479178	-2.45162067215453	-0.353670434918434	-0.3995675606055	-0.492516166850146	-0.134277082270814	0	-0.0986473180341742	1.175469098801
6	Bepridil	1	33	28	924	0.0833333333333333	0.694444444444444	0.662527392257122	0.602409638554217	0.870297585626053	1	0.902920781676823	-2.484906649788	-0.364643113587909	-0.411693375173312	-0.506817602368452	-0.138920073376369	0	-0.102120457346115	1.18646267332747
6	Bepridil	1	33	29	957	0.0806916426512968	0.686947988223749	0.654637315048719	0.593975392448027	0.866284756182758	1	0.899801067951	-2.51712026977166	-0.37549669817932	-0.423673914187896	-0.520917387332781	-0.143541606705415	0	-0.105581575699797	1.19694326043294
6	Bepridil	1	33	30	990	0.0782122905027933	0.679611650485437	0.646932952924394	0.585774058577406	0.86230876216968	1	0.896702838063439	-2.5483284762255	-0.386233746180277	-0.435512617479399	-0.534821129322206	-0.148141879681909	0	-0.10903075602029	1.20694794881815
6	Bepridil	1	33	31	1023	0.0758807588075881	0.672430355427474	0.63940782516743	0.577796120511762	0.858369098712446	1	0.893625870853697	-2.57859213386532	-0.396856733571564	-0.447212804133769	-0.548534205213176	-0.152721087017664	0	-0.112468080377541	1.21651025089081
6	Bepridil	1	33	32	1056	0.0736842105263158	0.665399239543726	0.63205574912892	0.570032573289902	0.854465270121279	1	0.890569948186528	-2.60796674254523	-0.40736805825425	-0.458777678078585	-0.562061773663683	-0.15727942076179	0	-0.115893629998091	1.2256605339583
7	Chloroquine	1	249.5	1	249.5	0.965048679694614	0.996890946361036	0.996448373298031	1	1	0.97699294573286	1	-0.0355767336360791	-0.00311389678723883	-0.00355794870144465	0	0	-0.0232758473002624	0	0.0211636298414092
7	Chloroquine	1	249.5	2	499	0.93245804006497	0.993801165231866	0.992921885416814	1	1	0.955020731927168	1	-0.0699311257259346	-0.00621812731322936	-0.00710328327110129	0	0	-0.0460222299127805	0	0.0415769600650757
7	Chloroquine	1	249.5	3	748.5	0.901996726677578	0.990730477965535	0.989420270394425	1	1	0.93401507471239	1	-0.103144387886655	-0.00931275140495778	-0.0106360928358073	0	0	-0.0682627009345159	0	0.0612899983477641
7	Chloroquine	1	249.5	4	998	0.873462660073539	0.98767870811625	0.985943266007493	1	1	0.913913568532735	1	-0.135289897804795	-0.0123978283356958	-0.0141564655811177	0	0	-0.0900192759680019	0	0.0803479268493456
7	Chloroquine	1	249.5	5	1247.5	0.846678547286917	0.984645681405582	0.982490613705744	1	1	0.894659066919992	1	-0.166434175507473	-0.0154734168318136	-0.0176644887645143	0	0	-0.111312564095507	0	0.0987917035948162
7	Chloroquine	1	249.5	6	1497	0.821488194610065	0.981631225689289	0.979062058547911	1	1	0.876199139927225	1	-0.196637712137512	-0.0185395750794865	-0.0211602487283817	0	0	-0.132161885196949	0	0.116658572998582
7	Chloroquine	1	249.5	7	1746.5	0.797753459556482	0.978635170924749	0.975657349138982	1	1	0.858485597374711	1	-0.225955677190778	-0.0215963607313015	-0.0246438309127599	0	0	-0.152585375285379	0	0.133982501521282
7	Chloroquine	1	249.5	8	1996	0.775351716375914	0.975657349138982	0.972276237568754	1	1	0.841474068779287	1	-0.254438524995556	-0.0246438309127599	-0.0281153198678737	0	0	-0.172600081299301	0	0.150794551259557
7	Chloroquine	1	249.5	9	2245.5	0.754173736931414	0.972697594397262	0.968918479351655	1	1	0.825123632257311	1	-0.282132517183429	-0.0276820422286843	-0.0315747992664459	0	0	-0.192222046593348	0	0.167123201786487
7	Chloroquine	1	249.5	10	2495	0.734121909633419	0.969755742772289	0.965583833367819	1	1	0.809396485867074	1	-0.309080174740116	-0.0307110507695261	-0.0350223519157981	0	0	-0.211466388201546	0	0.182994628613187
7	Chloroquine	1	249.5	11	2744.5	0.715108735142991	0.96683163231393	0.96227206180536	1	1	0.794257655834177	1	-0.335320670727619	-0.0337309121175801	-0.0384580597697444	0	0	-0.230347366805405	0	0.198432945103867
7	Chloroquine	1	249.5	12	2994	0.69705554993423	0.963925103019495	0.958982930103844	1	1	0.779674736919567	1	-0.360890172782988	-0.0367416813531029	-0.0418820039402808	0	0	-0.248878450218098	0	0.213460413453237
7	Chloroquine	1	249.5	13	3243.5	0.679891438440661	0.961035996804555	0.955716206898906	1	1	0.76561766087365	1	-0.385822142909268	-0.0397434130603418	-0.0452942647090743	0	0	-0.267072371092672	0	0.228097629355862
7	Chloroquine	1	249.5	14	3493	0.66355230206126	0.958164157474279	0.952471663967997	1	1	0.752058489494605	1	-0.410147600793978	-0.0427361613334722	-0.0486949215387586	0	0	-0.284941179473643	0	0.242363684208446
7	Chloroquine	1	249.5	15	3742.5	0.647980059257866	0.955309430695286	0.949249076177238	1	1	0.73897122929381	1	-0.43389535585356	-0.0457199797824471	-0.0520840530840375	0	0	-0.302496290735227	0	0.256276308047298
7	Chloroquine	1	249.5	16	3992	0.633121955702601	0.952471663967997	0.946048221429344	1	1	0.726331665181326	1	-0.457092212357816	-0.0486949215387586	-0.0554617372025999	0	0	-0.319748529383814	0	0.269851995903062
7	Chloroquine	1	249.5	17	4241.5	0.618929967207223	0.949650706599479	0.942868880612595	1	1	0.714117210932498	1	-0.479763151297188	-0.0516610392611151	-0.0588280509658524	0	0	-0.336708169145606	0	0.283106119829029
7	Chloroquine	1	249.5	18	4491	0.605360281195079	0.94684640967677	0.939710837550845	1	1	0.702306774492907	1	-0.501931492087126	-0.0546183851410338	-0.0621830706694709	0	0	-0.353384969711177	0	0.296053028509102
7	Chloroquine	1	249.5	19	4740.5	0.592372844920246	0.944058626040677	0.936573878954516	1	1	0.690880636431809	1	-0.523619036733928	-0.0575670109083515	-0.0655268718437768	0	0	-0.36978821046603	0	0.308706136062024
7	Chloroquine	1	249.5	20	4990	0.579930970620423	0.94128721026003	0.933457794372583	1	1	0.679820340070581	1	-0.544846198696344	-0.0605069678366534	-0.0688595292639389	0	0	-0.385926721499038	0	0.321078001418217
7	Chloroquine	1	249.5	21	5239.5	0.56800098940512	0.938532018606397	0.930362376145509	1	1	0.669108591998484	1	-0.56563211835208	-0.0634383067486223	-0.0721811169600077	0	0	-0.401808912148202	0	0.333180399445237
7	Chloroquine	1	249.5	22	5489	0.556551947002747	0.935792909029232	0.927287419359112	1	1	0.658729171847799	1	-0.585994766706111	-0.066361078021312	-0.0754917082267811	0	0	-0.417442797314765	0	0.345024384830207
7	Chloroquine	1	249.5	23	5738.5	0.545555335577113	0.933069741131464	0.924232721799349	1	1	0.648666850338262	1	-0.605951038749012	-0.06927533159134	-0.0787913756335103	0	0	-0.432836021751826	0	0.356620349586669
7	Chloroquine	1	249.5	24	5988	0.534984856721286	0.930362376145509	0.921198083907986	1	1	0.638907314719894	1	-0.625516837680588	-0.0721811169600077	-0.0820801910334437	0	0	-0.447995882511699	0	0.367978074934483
7	Chloroquine	1	249.5	25	6237.5	0.524816211480593	0.927670676909697	0.918183308739138	1	1	0.629437100846577	1	-0.6447071510508	-0.0750784831983453	-0.0853582255732157	0	0	-0.462929349717036	0	0.37910677820079
7	Chloroquine	1	249.5	26	6487	0.515026913875598	0.92499450784511	0.915188201916666	1	1	0.620243531202435	1	-0.663536119731287	-0.0779674789520849	-0.0886255497020812	0	0	-0.477643085803693	0	0.390015155304655
7	Chloroquine	1	249.5	27	6736.5	0.505596124912847	0.922333734932814	0.912212571592397	1	1	0.611314658281164	1	-0.682017100512628	-0.0808481524465595	-0.0918822331810007	0	0	-0.492143463368326	0	0.400711419315168
7	Chloroquine	1	249.5	28	6986	0.496504504504505	0.919688225691491	0.909256228405165	1	1	0.602639212786531	1	-0.700162723021439	-0.0837205514915339	-0.0951283450915773	0	0	-0.50643658174039	0	0.411203335510603
7	Chloroquine	1	249.5	29	7235.5	0.487734079082445	0.917057849155447	0.906318985440633	1	1	0.594206556181823	1	-0.717984941564825	-0.0865847234859664	-0.0983639538448488	0	0	-0.520528282386389	0	0.421498253312827
7	Chloroquine	1	249.5	30	7485	0.479268122999861	0.914442475853003	0.903400658191908	1	1	0.586006637168141	1	-0.735495082435192	-0.0894407154227014	-0.101589127189939	0	0	-0.534424163243768	0	0.431603135425338
7	Chloroquine	1	249.5	31	7734.5	0.471091052073717	0.91184197778525	0.900501064520901	1	1	0.578029951717177	1	-0.75270388714424	-0.0922885738930954	-0.10480393222257	0	0	-0.548129592072456	0	0.441524584463676
7	Chloroquine	1	249.5	32	7984	0.463188327842399	0.909256228405165	0.897620024620435	1	1	0.570267506324345	1	-0.769621551999402	-0.0951283450915773	-0.108008435393437	0	0	-0.561649718903771	0	0.45126886733282
8	Chlorpromazine	1	66.4	1	66.4	0.958419437660467	0.978345943125489	0.985647587757219	0.988673580786026	0.993715929739552	0.992888051068935	0.999996227286961	-0.0424697704613543	-0.0218919464160986	-0.0144564043355768	-0.0113910515991833	-0.00630389814013953	-0.0071373593901312	-3.77272015611802e-06	0.0186925366355295
8	Chlorpromazine	1	66.4	2	132.8	0.920158720615644	0.957609805924413	0.971701329696557	0.977600863581163	0.987510345346475	0.985876547411409	0.999992454602388	-0.0832091014110221	-0.0433148846859445	-0.0287067957147547	-0.0226538071965762	-0.0125683059615082	-0.0142241376834623	-7.54542607859682e-06	0.0364259099665904
8	Chlorpromazine	1	66.4	3	199.2	0.88483552061051	0.937734433608402	0.958144225920323	0.966773418734988	0.98138178555406	0.978963375997972	0.999988681946282	-0.122353503664411	-0.0642884898823618	-0.0427569633652641	-0.0337911245988499	-0.0187937151540994	-0.0212610467550888	-1.13181177681098e-05	0.0532807957926753
8	Chlorpromazine	1	66.4	4	265.6	0.852124046545293	0.918667319941205	0.944960212201591	0.956183185957503	0.975328825146764	0.972146482654474	0.999984909318641	-0.160023168213949	-0.0848312244053336	-0.0566124558651506	-0.0448057671765905	-0.0249806082817169	-0.0282487835567343	-1.50907952244421e-05	0.0693285388568833
8	Chlorpromazine	1	66.4	5	332	0.821744966442953	0.900360144057623	0.932134096484056	0.945822454308094	0.969350073855244	0.965423870027078	0.999981136719466	-0.196325191868248	-0.104960435636487	-0.0702785942986313	-0.0557004079798544	-0.0311294590064416	-0.0351880305309849	-1.88634584474901e-05	0.0846325185867953
8	Chlorpromazine	1	66.4	6	398.4	0.793457410959614	0.882768361581921	0.919651500484027	0.935683843471523	0.963444175291786	0.958793595631128	0.999977364148757	-0.231355412844727	-0.124692443957318	-0.083760484525052	-0.0664776336319408	-0.0372407323062362	-0.0420794560112497	-2.2636107437816e-05	0.0992492748891015
8	Chlorpromazine	1	66.4	7	464.8	0.767052573547837	0.865850842761487	0.907498805922624	0.925760286225403	0.957609805924413	0.952253769979866	0.999973591606513	-0.265199935573018	-0.14404262225017	-0.0970630286317393	-0.077139948015575	-0.0433148846859445	-0.0489237146080354	-2.64087421950941e-05	0.113229442796898
8	Chlorpromazine	1	66.4	8	531.2	0.742348547315322	0.849569551427277	0.89566310496543	0.916045012011632	0.951845674088041	0.945802554789209	0.999969819092733	-0.297936405791055	-0.163025467852225	-0.110190935635036	-0.0876897757646346	-0.0493523643819168	-0.05572144758209	-3.01813627198868e-05	0.12661853357454
8	Chlorpromazine	1	66.4	9	597.6	0.719186128471407	0.833889259506338	0.884132154490461	0.906531531531532	0.946150519031142	0.939438161255016	0.999966046607417	-0.329635083453159	-0.181654667806251	-0.123148731487979	-0.0981294655736067	-0.0553536115604986	-0.0624732832049494	-3.39539690120903e-05	0.139457591532151
8	Chlorpromazine	1	66.4	10	664	0.697425381635908	0.818777292576419	0.872894333843798	0.897213622291022	0.940523109996417	0.933158848399436	0.999962274150566	-0.360359750742822	-0.199943158143774	-0.135940768447835	-0.108461293336074	-0.0613190585105981	-0.0691798371073949	-3.77265610716009e-05	0.151783749503948
8	Chlorpromazine	1	66.4	11	730.4	0.676942810385245	0.804203302594896	0.861938605776501	0.888085315028193	0.934962245334093	0.926962921483141	0.999958501722178	-0.390168484696803	-0.217903177843864	-0.148571233852021	-0.118687465122721	-0.0672491298305423	-0.0758417126163034	-4.149913889887e-05	0.163630701149795
8	Chlorpromazine	1	66.4	12	796.8	0.657629012160014	0.790139064475348	0.851254480286738	0.879140880961048	0.929466751646484	0.920848730480391	0.999954729322254	-0.419114317965152	-0.235546318031252	-0.16104415834667	-0.128810120008601	-0.0731442426094275	-0.0824595010803484	-4.52717024939049e-05	0.175029104555825
8	Chlorpromazine	1	66.4	13	863.2	0.639386723482475	0.776558293642576	0.840831981118159	0.870374819798174	0.924035482962546	0.914814668614061	0.999950956950793	-0.447245806596878	-0.252883566909085	-0.173363423608324	-0.138831332758742	-0.079004806603154	-0.0890337821849999	-4.90442518564907e-05	0.186006928756097
8	Chlorpromazine	1	66.4	14	929.6	0.62212918174058	0.763436482084691	0.830661614689595	0.861781848459617	0.918667319941205	0.90885917094788	0.999947184607795	-0.47460752012124	-0.269925350862522	-0.185532769595753	-0.148753116380514	-0.0848312244053336	-0.0955651242572319	-5.28167869871899e-05	0.196589752568603
8	Chlorpromazine	1	66.4	15	996	0.605778745299822	0.750750750750751	0.8207343412527	0.853356890459364	0.913361169102297	0.902980713033314	0.999943412293259	-0.501240466346496	-0.286681572118197	-0.197555801365803	-0.15857742455061	-0.090623891613246	-0.102054084560348	-5.65893078857877e-05	0.206801023385516
8	Chlorpromazine	1	66.4	16	1062.4	0.590265725635389	0.738479716423789	0.811041548093341	0.845095065904584	0.908115962083996	0.89717780960861	0.999939640007185	-0.527182461041235	-0.303161643300167	-0.209435995484346	-0.168306153923973	-0.0963831969890175	-0.108501209579298	-6.03618145526246e-05	0.216662282168327
8	Chlorpromazine	1	66.4	17	1128.8	0.575527394427105	0.726603371439643	0.801575024609759	0.83699168207024	0.902930654925702	0.891449013347694	0.999935867749573	-0.552468450863426	-0.319374519184271	-0.221176706060876	-0.17794114633148	-0.102109522616183	-0.114907035296862	-6.41343069878188e-05	0.226193359790593
8	Chlorpromazine	1	66.4	18	1195.2	0.561507135781634	0.715102974828375	0.79232693911593	0.829042224510814	0.897804227375333	0.885792913656691	0.999932095520422	-0.577130796457616	-0.335328725919134	-0.232781170432928	-0.187484190872762	-0.107803244051791	-0.121272087461039	-6.79067851911556e-05	0.235412548981846
8	Chlorpromazine	1	66.4	19	1261.6	0.548153719422657	0.703960953632438	0.783289817232376	0.82124234867377	0.892735682220106	0.880208135515971	0.999928323319733	-0.601199521474307	-0.351032387952543	-0.244252514524445	-0.196937025910102	-0.113464730474209	-0.127596881843985	-7.16792491630865e-05	0.244336755408402
8	Chlorpromazine	1	66.4	20	1328	0.53542067517929	0.693160813308688	0.77445652173913	0.813587871982033	0.887724044639838	0.874693338365729	0.999924551147504	-0.624702532318559	-0.366493252876071	-0.25559375790028	-0.206301340968979	-0.119094344826753	-0.133881924492806	-7.54516989036187e-05	0.252981630844117
8	Chlorpromazine	1	66.4	21	1394.4	0.523265752675305	0.682687056253413	0.765820233776703	0.80607476635514	0.882768361581921	0.869247215033194	0.999920779003736	-0.647665812661878	-0.381718714378164	-0.266807818537269	-0.215578778550437	-0.124692443957318	-0.140127711972529	-7.92241344126484e-05	0.261361690908581
8	Chlorpromazine	1	66.4	22	1460.8	0.51165045298031	0.672525107604017	0.757374435290991	0.798699151140999	0.877867701157113	0.863868490699668	0.999917006888428	-0.67011359611739	-0.396715833475903	-0.277897517330741	-0.224770935860161	-0.130259378754103	-0.146334731601521	-8.29965556906273e-05	0.269490419460165
8	Chlorpromazine	1	66.4	23	1527.2	0.500539621283972	0.662661247570242	0.749112892627152	0.791457286432161	0.873021152055341	0.858555921905679	0.99991323480158	-0.69206851995558	-0.411491358178067	-0.288865582353881	-0.233879366458805	-0.13579549427759	-0.152503461679659	-8.67689627373404e-05	0.277380361409888
8	Chlorpromazine	1	66.4	24	1593.6	0.489901091514356	0.653082549634274	0.741029641185647	0.784345566742449	0.86822782298075	0.853308295592621	0.999909462743192	-0.71355176230507	-0.426051741716553	-0.299714652886029	-0.242905581837827	-0.141301129888883	-0.158634371709494	-9.05413555532393e-05	0.285043205455867
8	Chlorpromazine	1	66.4	25	1660	0.47970537533302	0.643776824034335	0.733118971061093	0.777360515021459	0.863486842105263	0.848124428179323	0.999905690713262	-0.734583164922934	-0.440403159469445	-0.310447283224794	-0.251851052924854	-0.146776619374543	-0.164727922610683	-9.43137341382203e-05	0.29248985801683
8	Chlorpromazine	1	66.4	26	1726.4	0.469925389173754	0.634732566012187	0.725375413591245	0.770498776986068	0.858797356539946	0.843003164672074	0.999901918711792	-0.755181343318403	-0.454551524686814	-0.321065946295764	-0.260717211522294	-0.152222291068012	-0.170784566927928	-9.80860984921796e-05	0.299730509458323
8	Chlorpromazine	1	66.4	27	1792.8	0.460536214004152	0.625938908362544	0.717793728749528	0.763757115749526	0.854158531823507	0.837943377806703	0.99989814673878	-0.775363785761735	-0.468502503119468	-0.331573037072569	-0.269505451682744	-0.157638467967756	-0.176804749032648	-0.000101858448615791	0.306774693550364
8	Chlorpromazine	1	66.4	28	1859.2	0.451514883323008	0.617385577872901	0.71036889332004	0.757132406730066	0.849569551427277	0.832943967221364	0.999894374794226	-0.795146942497843	-0.482261526641238	-0.34197087581913	-0.27821713102448	-0.163025467852225	-0.182788905318629	-0.000105630784508728	0.313631340964871
8	Chlorpromazine	1	66.4	29	1925.6	0.442840195596192	0.609062855286666	0.703096089798939	0.750621632822213	0.845029616276075	0.828003858658759	0.999890602878131	-0.81454630630505	-0.495833805946754	-0.352261711165066	-0.28685357199014	-0.168383603391733	-0.188737464391844	-0.000109403106170999	0.32030882751112
8	Chlorpromazine	1	66.4	30	1992	0.434492547906317	0.600961538461538	0.695970695970696	0.7442218798151	0.840537944284342	0.82312200319659	0.999886830990492	-0.833576485387368	-0.509224342399017	-0.362447723024474	-0.295416063051517	-0.173713182257355	-0.194650847254663	-0.000113175413603165	0.326815017714173
8	Chlorpromazine	1	66.4	31	2058.4	0.426453788068768	0.593072908429543	0.688988275111809	0.737930332043186	0.836093769906994	0.818297376505067	0.999883059131312	-0.852251269459501	-0.522437939094157	-0.372531025367541	-0.303905859863215	-0.179014507226935	-0.200529467484654	-0.000116947706804791	0.333157304261828
8	Chlorpromazine	1	66.4	32	2124.8	0.418707082865975	0.585388698095535	0.682144566778363	0.731744268255732	0.831696343704455	0.813528978130375	0.999879287300588	-0.870583689773452	-0.535479211204647	-0.382513668853815	-0.312324186367732	-0.184287876288308	-0.206373731408153	-0.00012071998577655	0.339342643777998
9	Cilostazol	1	162.4	1	162.4	0.988368761817452	0.998269807718533	1	0.998222463507964	1	1	1	-0.0116994101653309	-0.00173169079285741	0	-0.00177911818464855	0	0	0	0.00609415638014057
9	Cilostazol	1	162.4	2	324.8	0.977004984141368	0.996545592226732	1	0.996451235075083	1	1	1	-0.0232635254770665	-0.00346038801590319	0	-0.00355507672832481	0	0	0	0.0121069469922903
9	Cilostazol	1	162.4	3	487.2	0.965899546447169	0.994827322608592	1	0.994686281182106	1	1	1	-0.034695439361994	-0.00518610200123337	0	-0.00532788683392175	0	0	0	0.018040270386546
9	Cilostazol	1	162.4	4	649.6	0.955043738234968	0.993114968160967	1	0.992927568546842	1	1	1	-0.0459981403512382	-0.00690884302754464	0	-0.00709755964485547	0	0	0	0.0238959605342806
9	Cilostazol	1	162.4	5	812	0.944429236244183	0.991408498391739	1	0.991175064122071	1	1	1	-0.0571745167698771	-0.00862862132050292	0	-0.0088641062454867	0	0	0	0.0296757897166899
9	Cilostazol	1	162.4	6	974.4	0.93404808317089	0.989707883018007	1	0.989428735093475	1	1	1	-0.0682273611673736	-0.010345447053107	0	-0.0106275376615356	0	0	0	0.0353814712536888
9	Cilostazol	1	162.4	7	1136.8	0.923892667773553	0.988013091964301	1	0.987688548877587	1	1	1	-0.07915937450583	-0.0120593303460496	0	-0.0123878648604962	0	0	0	0.0410146620836232
9	Cilostazol	1	162.4	8	1299.2	0.913955706262583	0.986324095360803	1	0.985954473119767	1	1	1	-0.0899731701217725	-0.0137702812680756	0	-0.0141450987520454	0	0	0	0.0465769652034822
9	Cilostazol	1	162.4	9	1461.6	0.904230224878125	0.984640863541597	1	0.984226475692196	1	1	1	-0.100671277476012	-0.015478309836336	0	-0.0158992501884478	0	0	0	0.0520699319785646
9	Cilostazol	1	162.4	10	1624	0.894709543568465	0.982963367042927	1	0.98250452469189	1	1	1	-0.111256145705031	-0.0171834260167411	0	-0.0176503299649585	0	0	0	0.0574950643298899
9	Cilostazol	1	162.4	11	1786.4	0.885387260688806	0.981291576601485	1	0.980788588438739	1	1	1	-0.121730146986381	-0.0188856397243089	0	-0.0193983488202223	0	0	0	0.0628538168070378
9	Cilostazol	1	162.4	12	1948.8	0.876257238646754	0.9796254631527	1	0.979078635473565	1	1	1	-0.132095579729651	-0.0205849608235109	0	-0.0211433174366671	0	0	0	0.0681475985535443
9	Cilostazol	1	162.4	13	2111.2	0.867313590426869	0.977964997829064	1	0.977374634556195	1	1	1	-0.142354671603741	-0.0222813991286152	0	-0.0228852464408978	0	0	0	0.073377775171465
9	Cilostazol	1	162.4	14	2273.6	0.858550666932112	0.976310151958455	1	0.975676554663563	1	1	1	-0.152509582410429	-0.0239749644040261	0	-0.0246241464040825	0	0	0	0.0785456704912528
9	Cilostazol	1	162.4	15	2436	0.849963045084996	0.974660897062495	1	0.973984364987825	1	1	1	-0.162562406813492	-0.0256656663646221	0	-0.0263600278423387	0	0	0	0.0836525682526591
9	Cilostazol	1	162.4	16	2598.4	0.841545516635769	0.973017204854909	1	0.972298034934498	1	1	1	-0.172515176932002	-0.0273535146760902	0	-0.0280929012171149	0	0	0	0.0886997137019748
9	Cilostazol	1	162.4	17	2760.8	0.8332930776291	0.971379047239915	1	0.970617534120612	1	1	1	-0.182369864805848	-0.0290385189552568	0	-0.0298227769355681	0	0	0	0.0936883151105553
9	Cilostazol	1	162.4	18	2923.2	0.825200918484501	0.969746396310617	1	0.96894283237289	1	1	1	-0.192128384740943	-0.0307206887704174	0	-0.0315496653509392	0	0	0	0.0986195452192419
9	Cilostazol	1	162.4	19	3085.6	0.817264414649169	0.968119224347423	1	0.967273899725939	1	1	1	-0.201792595541112	-0.032400033641661	0	-0.0332735767629255	0	0	0	0.103494542612973
9	Cilostazol	1	162.4	20	3248	0.809479117785077	0.966497503816479	1	0.965610706420464	1	1	1	-0.211364302633157	-0.0340765630411954	0	-0.0349945214180478	0	0	0	0.1083144130296
9	Cilostazol	1	162.4	21	3410.4	0.801840747455027	0.964881207368109	1	0.963953222901499	1	1	1	-0.220845260091179	-0.0357502863936665	0	-0.0367125095100173	0	0	0	0.113080230606642
9	Cilostazol	1	162.4	22	3572.8	0.794345183275005	0.963270307835284	1	0.962301419816656	1	1	1	-0.230237172565836	-0.0374212130764767	0	-0.038427551180097	0	0	0	0.117793039069489
9	Cilostazol	1	162.4	23	3735.2	0.786988457502623	0.961664778232097	1	0.960655268014393	1	1	1	-0.239541697123846	-0.0390893524200996	0	-0.0401396565174608	0	0	0	0.122453852864314
9	Cilostazol	1	162.4	24	3897.6	0.779766748033632	0.960064591752256	1	0.959014738542298	1	1	1	-0.248760445002694	-0.0407547137083929	0	-0.0418488355595508	0	0	0	0.127063658238749
9	Cilostazol	1	162.4	25	4060	0.772676371780515	0.958469721767594	1	0.957379802645391	1	1	1	-0.257894983285194	-0.0424173061789088	0	-0.0435550982924287	0	0	0	0.131623414273205
9	Cilostazol	1	162.4	26	4222.4	0.765713778409091	0.956880141826589	1	0.95575043176445	1	1	1	-0.266946836498263	-0.0440771390232007	0	-0.0452584546511268	0	0	0	0.136134053865493
9	Cilostazol	1	162.4	27	4384.8	0.758875544410717	0.955295825652904	1	0.954126597534336	1	1	1	-0.275917488139977	-0.0457342213871288	0	-0.0469589145199957	0	0	0	0.140596484671279
9	Cilostazol	1	162.4	28	4547.2	0.752158367489317	0.953716747143939	1	0.95250827178236	1	1	1	-0.284808382138744	-0.0473885623711624	0	-0.0486564877330466	0	0	0	0.145011590002727
9	Cilostazol	1	162.4	29	4709.6	0.745559061243895	0.952142880369395	1	0.950895426526646	1	1	1	-0.293620924248176	-0.0490401710306786	0	-0.050351184074295	0	0	0	0.149380229687522
9	Cilostazol	1	162.4	30	4872	0.739074550128535	0.950574199569858	1	0.949288033974519	1	1	1	-0.302356483381041	-0.0506890563762614	0	-0.0520430132780966	0	0	0	0.153703240890377
9	Cilostazol	1	162.4	31	5034.4	0.732701864673151	0.949010679155391	1	0.947686066520911	1	1	1	-0.311016392885444	-0.0523352273739958	0	-0.0537319850294841	0	0	0	0.157981438898958
9	Cilostazol	1	162.4	32	5196.8	0.726438136949381	0.947452293704144	1	0.94608949674678	1	1	1	-0.319601951766232	-0.0539786929457602	0	-0.0554181089645005	0	0	0	0.162215617876058
10	Cisapride	1	4.9	1	4.9	0.814393939393939	0.997640714526458	1	0.999584918127218	0.999268645800684	0.999833914632121	0.99997763750765	-0.205311075018653	-0.0023620729727157	0	-0.000415168043108261	-0.000731621769265679	-0.00016609916158112	-2.23627423942519e-05	0.126526817939029
10	Cisapride	1	4.9	2	9.8	0.686900958466454	0.995292535305985	1	0.999170180697387	0.998538360577497	0.999667884423779	0.99995527601544	-0.37556516241249	-0.00471857970199437	0	-0.000830163793240493	-0.00146270865942359	-0.000332170738812486	-4.47249847073423e-05	0.231458344223561
10	Cisapride	1	4.9	3	14.7	0.593922651933702	0.992955384099296	1	0.998755787281945	0.997809141988465	0.999501909347501	0.999932915523302	-0.521006183698108	-0.00706954635996541	0	-0.0012449873933392	-0.00219326145198825	-0.000498214740854326	-6.70867269618224e-05	0.321104853785441
10	Cisapride	1	4.9	4	19.6	0.523114355231144	0.990629183400268	1	0.998341737453044	0.997080987698448	0.99933598937583	0.99991055603117	-0.647955186368572	-0.00941499893460187	0	-0.00165963898616862	-0.00292328092676365	-0.000664231176862783	-8.94479691800254e-05	0.399360123869497
10	Cisapride	1	4.9	5	24.5	0.467391304347826	0.988313856427379	1	0.997928030783543	0.996353895379121	0.999170124481328	0.999888197538977	-0.760588461355478	-0.0117549632314437	0	-0.00207411871431638	-0.00365276786184589	-0.00083022005598902	-0.000111808711384067	0.468796757693555
10	Cisapride	1	4.9	6	29.4	0.422396856581532	0.986009327115256	1	0.997514666847008	0.995627862708941	0.999004314636575	0.999865840046655	-0.86180998842286	-0.0140894648753012	0	-0.00248842672019214	-0.00438172303363074	-0.000996181387379868	-0.000134168953596735	0.531203612431906
10	Cisapride	1	4.9	7	34.3	0.385304659498208	0.983715520106348	1	0.997101645217715	0.994902887373129	0.99883855981417	0.999843483554137	-0.953720934253648	-0.0164185293119392	0	-0.00290256314602857	-0.00511014721681632	-0.00116211518017726	-0.000156528695840042	0.587875010908802
10	Cisapride	1	4.9	8	39.2	0.354200988467875	0.981432360742706	1	0.99668896547064	0.994178967063645	0.998672859986729	0.999821128061357	-1.03789076293184	-0.0187421818097406	0	-0.00331652813388207	-0.0058380411844099	-0.00132802144351934	-0.00017888793813634	0.639777746159139
10	Cisapride	1	4.9	9	44.1	0.327743902439024	0.97915977505789	1	0.996276627181466	0.993456099479159	0.998507215126887	0.999798773568247	-1.11552276081643	-0.021060447461352	0	-0.00373032182563259	-0.00656540570773101	-0.00149390018653889	-0.000201246680508319	0.68765304505832
10	Cisapride	1	4.9	10	49	0.304964539007092	0.976897689768977	1	0.995864629926576	0.99273428232503	0.998341625207297	0.99977642007474	-1.18755977468461	-0.0233733511853088	0	-0.00414394436298394	-0.00729224155641858	-0.00165975141836451	-0.000223604922978004	0.732081703214894
10	Cisapride	1	4.9	11	53.9	0.285145888594164	0.974646032268686	1	0.995452973283054	0.992013513313281	0.99817609020063	0.999754067580769	-1.25475433988029	-0.0256809177276427	0	-0.00455739588746423	-0.00801854949843323	-0.00182557514811999	-0.000245962665567762	0.773527284040345
10	Cisapride	1	4.9	12	58.8	0.267745952677459	0.972404730617608	1	0.995041656828684	0.991293790162575	0.998010610079576	0.999731716086267	-1.3177166858191	-0.0279831716634705	0	-0.00497067654042578	-0.00874433030006456	-0.00199137138492518	-0.000268319908300184	0.812365690229337
10	Cisapride	1	4.9	13	63.7	0.252347417840376	0.970173713536545	1	0.994630680141946	0.990575110598192	0.997845184816841	0.999709365591167	-1.37694849870165	-0.0302801373985636	0	-0.00538378646304663	-0.00946958472593398	-0.00215714013789502	-0.000290676651197533	0.848905961653846
10	Cisapride	1	4.9	14	68.6	0.238623751387347	0.967952910398953	1	0.994220042802015	0.989857472352002	0.997679814385151	0.999687016095403	-1.43286722948068	-0.0325718391709016	0	-0.00579672579632898	-0.0101943135390013	-0.00232288141613975	-0.000313032894281854	0.883405249116041
10	Cisapride	1	4.9	15	73.5	0.226315789473684	0.965742251223491	1	0.993809744388765	0.989140873162444	0.997514498757249	0.999664667598906	-1.48582395646692	-0.0348583010522057	0	-0.00620949468110092	-0.010918517500568	-0.00248859522876524	-0.000335388637575974	0.916079817746728
10	Cisapride	1	4.9	16	78.4	0.215215215215215	0.963541666666667	1	0.993399784482759	0.9884253107745	0.997349237905898	0.99964232010161	-1.53611675052089	-0.0371395469494568	0	-0.00662209325801599	-0.0116421973702833	-0.00265428158487272	-0.000357743881101949	0.947113279988276
10	Cisapride	1	4.9	17	83.3	0.205152671755725	0.961351088015589	1	0.992990162665253	0.987710782939675	0.997184031803876	0.999619973603448	-1.58400083675332	-0.0394156006063944	0	-0.00703452166755372	-0.0123653539061483	-0.00281994049355937	-0.00038009862488228	0.97666285522101
10	Cisapride	1	4.9	18	88.2	0.195989061075661	0.959170447180817	1	0.992580878518194	0.986997287415969	0.997018880423981	0.999597628104354	-1.62969643214757	-0.0416864856050001	0	-0.00744678005002006	-0.0130879878645203	-0.00298557196391738	-0.000402452868938919	1.00486419775314
10	Cisapride	1	4.9	19	93.1	0.18760907504363	0.956999676689298	1	0.992171931624219	0.986284821967855	0.99685378373903	0.999575283604259	-1.67339486914702	-0.0439522253669637	0	-0.00785886854554715	-0.0138101000001189	-0.00315117600503454	-0.000424806613294713	1.03183516896201
10	Cisapride	1	4.9	20	98	0.179916317991632	0.954838709677419	1	0.99176332156665	0.985573384366259	0.996688741721854	0.999552940103097	-1.71526343623795	-0.0462128431551317	0	-0.00827078729409478	-0.014531691066029	-0.00331675262599382	-0.000447159857971845	1.05767881910211
10	Cisapride	1	4.9	21	102.9	0.172829581993569	0.952687479884132	1	0.991355047929496	0.984862972388532	0.996523754345307	0.999530597600802	-1.75544924517146	-0.0484683620749415	0	-0.00868253643544891	-0.0152527618137073	-0.00348230183587444	-0.000469512602992279	1.082485769521
10	Cisapride	1	4.9	22	107.8	0.166279969064192	0.950545921644187	1	0.990947110297452	0.984153583818428	0.996358821582258	0.999508256097305	-1.79408235064419	-0.0507188050758376	0	-0.00909411610922345	-0.0159733129929854	-0.00364782364375058	-0.000491864848378987	1.1063361343884
10	Cisapride	1	4.9	23	112.7	0.160208643815201	0.948413969881448	1	0.990539508255895	0.983445216446083	0.996193943405593	0.99948591559254	-1.83127828940396	-0.0529641949526734	0	-0.00950552645485965	-0.0166933453520757	-0.00381331805869185	-0.000514216594154053	1.12930108479
10	Cisapride	1	4.9	24	117.6	0.154565061107117	0.946291560102302	1	0.990132241390884	0.982737868067992	0.99602911978822	0.999463576086441	-1.86714016379578	-0.0552045543470957	0	-0.00991676761162706	-0.0174128596375752	-0.00397878508976335	-0.000536567840339346	1.15144413219567
10	Cisapride	1	4.9	25	122.5	0.149305555555556	0.944178628389155	1	0.989725309289159	0.982031536486982	0.99586435070306	0.999441237578939	-1.90176036444238	-0.057439905748915	0	-0.0103278397186234	-0.0181318565944708	-0.00414422474602625	-0.00055891858695796	1.17282218963388
10	Cisapride	1	4.9	26	127.4	0.144392209536602	0.942075111394016	1	0.989318711538139	0.981326219512195	0.995699636123057	0.999418900069969	-1.93522200455635	-0.0596702714974605	0	-0.0107387429147746	-0.0188503369661431	-0.00430963703653664	-0.000581268834031772	1.19348645523063
10	Cisapride	1	4.9	27	132.3	0.139791937581274	0.939980946332169	1	0.98891244772592	0.980621914959061	0.995534976021167	0.999396563559463	-1.96760012193793	-0.0618956737829187	0	-0.0111494773388357	-0.0195683014943724	-0.00447502197034622	-0.000603618581583108	1.21348315264233
10	Cisapride	1	4.9	28	137.2	0.135475740390674	0.937896070975919	1	0.988506517441276	0.979918620649278	0.99537037037037	0.999374228047354	-1.99896269239875	-0.0641161346476589	0	-0.0115600431293911	-0.0202857509193414	-0.00464037955650234	-0.000625967829634521	1.2328541553267
10	Cisapride	1	4.9	29	142.1	0.131418092909535	0.935820423648435	1	0.988100920273654	0.979216334410788	0.99520581914366	0.999351893533576	-2.02937148903503	-0.0663316759875428	0	-0.011970440424854	-0.0210026859796418	-0.0048057098040475	-0.000648316578208233	1.25163751585668
10	Cisapride	1	4.9	30	147	0.127596439169139	0.933753943217665	1	0.987695655813175	0.978515054077755	0.99504132231405	0.999329560018061	-2.0588828146588	-0.0685423195532204	0	-0.0123806693634676	-0.0217191074122771	-0.00497101272202039	-0.000670664827326252	1.26986791709939
10	Cisapride	1	4.9	31	151.9	0.1239907727797	0.931696569090337	1	0.987290723650633	0.977814777490543	0.99487687985457	0.999307227500742	-2.08754812921282	-0.0707480869514099	0	-0.0127907300833051	-0.0224350159526683	-0.00513628831945472	-0.000693012577011477	1.28757705870494
10	Cisapride	1	4.9	32	156.8	0.120583286595625	0.92964824120603	1	0.986886123377492	0.977115502495695	0.994712491738268	0.999284895981553	-2.11541458973548	-0.0729489996461677	0	-0.0132006227222696	-0.0231504123346582	-0.0053015366053799	-0.000715359827286033	1.30479398972574
11	Clarithromycin	1	4011	1	4011	0.964142998900421	1	1	1	1	1	1	-0.0365156562644285	0	0	0	0	0	0	0.0224937120974885
11	Clarithromycin	1	4011	2	8022	0.930768434134217	1	1	1	1	1	1	-0.0717447607480653	0	0	0	0	0	0	0.0441949059078599
11	Clarithromycin	1	4011	3	12033	0.899627136458047	1	1	1	1	1	1	-0.105774894325201	0	0	0	0	0	0	0.0651575314123848
11	Clarithromycin	1	4011	4	16044	0.870502203496537	1	1	1	1	1	1	-0.138684988477227	0	0	0	0	0	0	0.0854302105502378
11	Clarithromycin	1	4011	5	20055	0.843203940424534	1	1	1	1	1	1	-0.170546428026957	0	0	0	0	0	0	0.105056916504892
11	Clarithromycin	1	4011	6	24066	0.817565723642318	1	1	1	1	1	1	-0.201423983549562	0	0	0	0	0	0	0.124077548070982
11	Clarithromycin	1	4011	7	28077	0.793440596790925	1	1	1	1	1	1	-0.231376604085258	0	0	0	0	0	0	0.142528417966798
11	Clarithromycin	1	4011	8	32088	0.770698452171676	1	1	1	1	1	1	-0.260458094541096	0	0	0	0	0	0	0.160442670115039
11	Clarithromycin	1	4011	9	36099	0.749223683387867	1	1	1	1	1	1	-0.288717697342342	0	0	0	0	0	0	0.177850637941153
11	Clarithromycin	1	4011	10	40110	0.728913219789132	1	1	1	1	1	1	-0.316200594129088	0	0	0	0	0	0	0.194780153419374
11	Clarithromycin	1	4011	11	44121	0.709674872179561	1	1	1	1	1	1	-0.3429483403348	0	0	0	0	0	0	0.211256814773919
11	Clarithromycin	1	4011	12	48132	0.691425933761588	1	1	1	1	1	1	-0.36899924314167	0	0	0	0	0	0	0.227304219300186
11	Clarithromycin	1	4011	13	52143	0.674091991524629	1	1	1	1	1	1	-0.394388691441602	0	0	0	0	0	0	0.242944166621332
11	Clarithromycin	1	4011	14	56154	0.657605912050926	1	1	1	1	1	1	-0.419149444935498	0	0	0	0	0	0	0.258196836773974
11	Clarithromycin	1	4011	15	60165	0.641906972591733	1	1	1	1	1	1	-0.443311888296647	0	0	0	0	0	0	0.273080946773306
11	Clarithromycin	1	4011	16	64176	0.626940113703742	1	1	1	1	1	1	-0.466904255345042	0	0	0	0	0	0	0.287613888704897
11	Clarithromycin	1	4011	17	68187	0.612655294057499	1	1	1	1	1	1	-0.489952827381057	0	0	0	0	0	0	0.301811851898602
11	Clarithromycin	1	4011	18	72198	0.599006931484937	1	1	1	1	1	1	-0.512482109172476	0	0	0	0	0	0	0.315689931336901
11	Clarithromycin	1	4011	19	76209	0.585953417110818	1	1	1	1	1	1	-0.534514985549812	0	0	0	0	0	0	0.329262224117906
11	Clarithromycin	1	4011	20	80220	0.573456691657362	1	1	1	1	1	1	-0.556072861118821	0	0	0	0	0	0	0.342541915518527
11	Clarithromycin	1	4011	21	84231	0.561481874834054	1	1	1	1	1	1	-0.577175785228379	0	0	0	0	0	0	0.35554135597492
11	Clarithromycin	1	4011	22	88242	0.549996940211737	1	1	1	1	1	1	-0.597842564022482	0	0	0	0	0	0	0.368272130106724
11	Clarithromycin	1	4011	23	92253	0.538972429198962	1	1	1	1	1	1	-0.618090861145884	0	0	0	0	0	0	0.380745118751923
11	Clarithromycin	1	4011	24	96264	0.528381198741879	1	1	1	1	1	1	-0.637937288454741	0	0	0	0	0	0	0.39297055484477
11	Clarithromycin	1	4011	25	100275	0.518198198198198	1	1	1	1	1	1	-0.657397487899543	0	0	0	0	0	0	0.404958073855828
11	Clarithromycin	1	4011	26	104286	0.508400271523928	1	1	1	1	1	1	-0.676486205591591	0	0	0	0	0	0	0.416716759417053
11	Clarithromycin	1	4011	27	108297	0.498965981484823	1	1	1	1	1	1	-0.695217358931637	0	0	0	0	0	0	0.428255184673162
11	Clarithromycin	1	4011	28	112308	0.489875453083695	1	1	1	1	1	1	-0.713604097566225	0	0	0	0	0	0	0.439581449830858
11	Clarithromycin	1	4011	29	116319	0.481110233796823	1	1	1	1	1	1	-0.73165885884048	0	0	0	0	0	0	0.450703216317843
11	Clarithromycin	1	4011	30	120330	0.472653168551144	1	1	1	1	1	1	-0.749393418333058	0	0	0	0	0	0	0.461627737912445
11	Clarithromycin	1	4011	31	124341	0.464488287659728	1	1	1	1	1	1	-0.766818935987527	0	0	0	0	0	0	0.472361889160636
11	Clarithromycin	1	4011	32	128352	0.456600706175223	1	1	1	1	1	1	-0.783945998292756	0	0	0	0	0	0	0.482912191359227
12	Disopyramide	1	4713	1	4713	0.732413558167263	0.980367653490959	1	0.995474417930254	0.945522638216222	1	1	-0.311409954382532	-0.0198276210477432	0	-0.00453585351751596	-0.0560174480542102	0	0	0.213070039178981
12	Disopyramide	1	4713	2	9426	0.577801666218758	0.961491322678694	1	0.990989613105878	0.896674193760551	1	1	-0.548524607224914	-0.0392697387691754	0	-0.00905122593222563	-0.109062700561101	0	0	0.37910931692867
12	Disopyramide	1	4713	3	14139	0.47708864972817	0.943328162764691	1	0.986545036870539	0.852625105535809	1	1	-0.740052956874756	-0.0583410581961572	0	-0.0135463013729576	-0.15943532922974	0	0	0.515931278126785
12	Disopyramide	1	4713	4	18852	0.406273620559335	0.925838506384686	1	0.982140150366822	0.812701188252593	1	1	-0.900728404113138	-0.077055458697865	0	-0.0180212614966207	-0.207391779119219	0	0	0.632721838175484
12	Disopyramide	1	4713	5	23565	0.353763883175648	0.908985574416314	1	0.977774424318449	0.776348882456224	1	1	-1.03912558506857	-0.0954260546596108	0	-0.0224762855322538	-0.253153269040475	0	0	0.734857962369248
12	Disopyramide	1	4713	6	28278	0.313274078391374	0.89273521780691	1	0.973447338818267	0.743109431494032	1	1	-1.16067682178693	-0.113465250687891	0	-0.0269115503240993	-0.29691196180663	0	0	0.825768457157177
12	Disopyramide	1	4713	7	32991	0.281100869451526	0.877055686607712	1	0.969158383121855	0.712599419815142	1	1	-1.26904170804161	-0.131184791923718	0	-0.0313272303737253	-0.338835839990999	0	0	0.907779733247829
12	Disopyramide	1	4713	8	37704	0.254920559639554	0.861917422927333	1	0.964907055446555	0.684495916454679	1	1	-1.3668033131848	-0.148595809975335	0	-0.0357234978812217	-0.37907260000601	0	0	0.982546342225704
12	Disopyramide	1	4713	9	42417	0.233201366668474	0.847292874963549	1	0.960692862775769	0.658525000603782	1	1	-1.45585296402351	-0.165708864920182	0	-0.0401005227854956	-0.417752792530452	0	0	1.05128935271395
12	Disopyramide	1	4713	10	47130	0.214892553723138	0.833156329651657	1	0.95651532066837	0.634452803847049	1	1	-1.53761712589613	-0.18253398377298	0	-0.0444584728036874	-0.454992377814045	0	0	1.11493720785071
12	Disopyramide	1	4713	11	51843	0.199249339696956	0.819483761790851	1	0.952373953073053	0.612078447804973	1	1	-1.61319827525981	-0.199080695770832	0	-0.0487975134697328	-0.490894821996646	0	0	1.17421340409323
12	Disopyramide	1	4713	12	56556	0.185729094678645	0.806252697786274	1	0.948268292147493	0.591228425221891	1	1	-1.68346614718961	-0.215358064786251	0	-0.0531178081720911	-0.525552829952741	0	0	1.22969344464477
12	Disopyramide	1	4713	13	61269	0.173927112405452	0.793442092381135	1	0.944197878082168	0.571752091648086	1	1	-1.74911896174984	-0.231374719144146	0	-0.0574195181906626	-0.559049787759596	0	0	1.28184317500052
12	Disopyramide	1	4713	14	65982	0.163535407317259	0.781032216956712	1	0.940162258928685	0.553518019785901	1	1	-1.8107257535749	-0.247138879088365	0	-0.0617028027329149	-0.591460971291295	0	0	1.3310453775105
12	Disopyramide	1	4713	15	70695	0.154315449488606	0.769004558153213	1	0.936160990432502	0.536411029869832	1	1	-1.86875639832198	-0.26265838211667	0	-0.0659678189692389	-0.622854565016017	0	0	1.37761870561378
12	Disopyramide	1	4713	16	75408	0.146079630384563	0.75734172571583	1	0.932193635869898	0.520329754210982	1	1	-1.92360339236484	-0.277940706379631	0	-0.0702147220675541	-0.653292525676765	0	0	1.42183147138103
12	Disopyramide	1	4713	17	80121	0.138678362950302	0.746027368601234	1	0.928259765889073	0.505184627071226	1	1	-1.9755979627468	-0.292992992318311	0	-0.0744436652271822	-0.682831318360657	0	0	1.46391188563615
12	Disopyramide	1	4713	18	84834	0.131990914113819	0.735046098493366	1	0.924358958355253	0.490896215658269	1	1	-2.0250221912359	-0.307822062697463	0	-0.0786547997120073	-0.71152254693487	0	0	1.50405579735373
12	Disopyramide	1	4713	19	89547	0.125918767753082	0.724383419976177	1	0.920490798199684	0.477393826562473	1	1	-2.07211828031167	-0.322434441174932	0	-0.0828482748829413	-0.739413496534138	0	0	1.5424326346791
12	Disopyramide	1	4713	20	94260	0.120380739081747	0.714025666697006	1	0.916654877272406	0.464614336021811	1	1	-2.11709573330878	-0.336836369533748	0	-0.0870242382297107	-0.766547602424059	0	0	1.57919002941992
12	Disopyramide	1	4713	21	98973	0.115309323965568	0.703959942929443	1	0.912850794198682	0.452501203166402	1	1	-2.16013698797262	-0.351033823690869	0	-0.0911828354019827	-0.792964856914416	0	0	1.61445746220936
12	Disopyramide	1	4713	22	103686	0.110647933714168	0.694174070010264	1	0.909078154239003	0.441003633697422	1	1	-2.20140188672932	-0.365032528585308	0	-0.0953242102398473	-0.818702163892543	0	0	1.64834916856932
12	Disopyramide	1	4713	23	108399	0.106348774515866	0.684656537182654	1	0.905336569152536	0.430075867906771	1	1	-2.24103126052531	-0.378837972038489	0	-0.0994485048036702	-0.843793648865213	0	0	1.68096647980771
12	Disopyramide	1	4713	24	113112	0.102371202742596	0.675396456428535	1	0.901625657063937	0.419676571991463	1	1	-2.27914982914423	-0.392455417670826	0	-0.103555859403332	-0.868270931045373	0	0	1.71239972655066
12	Disopyramide	1	4713	25	117825	0.0986804360298336	0.666383520917392	1	0.897945042333427	0.409768315591734	1	1	-2.31586856870657	-0.405889916950577	0	-0.107646412626873	-0.892163362926475	0	0	1.74272980008414
12	Disopyramide	1	4713	26	122538	0.0952465334691889	0.657607966738197	1	0.894294355430032	0.400317121631806	1	1	-2.35128665966187	-0.41914632044403	0	-0.111720301368547	-0.91549824189779	0	0	1.77202944326093
12	Disopyramide	1	4713	27	127251	0.0920435815655971	0.649060537615726	1	0.89067323280791	0.391292077052968	1	1	-2.38549310142999	-0.432229288329697	0	-0.115777660856315	-0.938300997727038	0	0	1.80036432569041
12	Disopyramide	1	4713	28	131964	0.0890490390987409	0.640732452343227	1	0.887081316785663	0.382664995041261	1	1	-2.41856805988592	-0.445143300233561	0	-0.119818624678776	-0.960595359139352	0	0	1.82779394537482
12	Disopyramide	1	4713	29	136677	0.0862432058404701	0.632615374690547	1	0.883518255428562	0.374410120973832	1	1	-2.45058399903753	-0.457892664437309	0	-0.123843324811563	-0.982403502228494	0	0	1.85437238959935
12	Disopyramide	1	4713	30	141390	0.0836087886447599	0.624701385570951	1	0.8799837024336	0.366503875621668	1	1	-2.48160663708731	-0.470481526506922	0	-0.1278518916432	-1.00374618302739	0	0	1.88014898083404
12	Disopyramide	1	4713	31	146103	0.0811305447067036	0.616982957271276	1	0.876477317017289	0.358924630215486	1	1	-2.51169575859914	-0.482913877384861	0	-0.131844454000452	-1.02464285622457	0	0	1.90516882804159
12	Disopyramide	1	4713	32	150816	0.0787949864399326	0.609452929569149	1	0.87299876380613	0.351652508855797	1	1	-2.54090590800111	-0.495193560985373	0	-0.135821139173171	-1.04511178172833	0	0	1.92947329966492
13	Dofetilide	1	2	1	2	0.925925925925926	0.99998647753242	0.9999973445288	0.999925099243502	0.999980000399992	1	0.903846153846154	-0.0769610411361284	-1.35225590091852e-05	-2.65547472592241e-06	-7.49035616992575e-05	-1.99998000025363e-05	0	-0.101096116871369	0.0473693332831144
13	Dofetilide	1	2	2	4	0.862068965517241	0.999972955430549	0.999994689071703	0.999850209706411	0.999960001599936	1	0.824561403508772	-0.148420005118273	-2.70449351615359e-05	-5.31094240017159e-06	-0.00014980151327541	-3.99992000214138e-05	0	-0.192903666124492	0.0913493801559122
13	Dofetilide	1	2	3	6	0.806451612903226	0.999959433694373	0.999992033628709	0.999775331386205	0.999940003599784	1	0.758064516129032	-0.215111379616945	-4.05671284613728e-05	-7.96640302311672e-06	-0.000224693855568327	-5.99982000719323e-05	0	-0.276986783335033	0.132392586387437
13	Dofetilide	1	2	4	8	0.757575757575758	0.999945912323877	0.999989378199817	0.999700464280365	0.999920006399488	1	0.701492537313433	-0.277631736598279	-5.40891389140163e-05	-1.06218565943498e-05	-0.000299580589418552	-7.99968001707268e-05	0	-0.354545017680907	0.170866441416617
13	Dofetilide	1	2	5	10	0.714285714285714	0.999932391319045	0.999986722785029	0.999625608386372	0.999900009999	1	0.652777777777778	-0.336472236621213	-6.76109665245654e-05	-1.32773031144622e-05	-0.000374461715665645	-9.99950003333249e-05	0	-0.426518517305997	0.207073501059716
13	Dofetilide	1	2	6	12	0.675675675675676	0.999918870679864	0.999984067384343	0.999550763701707	0.999880014398272	1	0.61038961038961	-0.392042087776024	-8.11326112975645e-05	-1.59327425829347e-05	-0.000449337235149616	-0.000119992800575812	0	-0.493657820143625	0.24126583826005
13	Dofetilide	1	2	7	14	0.641025641025641	0.999905350406317	0.999981411997759	0.999475930223853	0.999860019597256	1	0.573170731707317	-0.444685821261446	-9.46540732382249e-05	-1.85881750002478e-05	-0.000524207148709822	-0.00013999020091461	0	-0.556571645554195	0.273655684875591
13	Dofetilide	1	2	8	16	0.609756097560976	0.999891830498391	0.999978756625278	0.999401107950292	0.999840025595905	1	0.540229885057471	-0.494696241836107	-0.000108175352351536	-2.12436003661043e-05	-0.00059907145718563	-0.000159987201365145	0	-0.615760516944525	0.304423409181106
13	Dofetilide	1	2	9	18	0.581395348837209	0.99987831095607	0.999976101266898	0.999326296878509	0.999820032394169	1	0.510869565217391	-0.542324290825362	-0.000121696448642156	-2.38990186808735e-05	-0.000673930161416527	-0.000179983801943842	0	-0.671640975338982	0.333723591498692
13	Dofetilide	1	2	10	20	0.555555555555556	0.99986479177934	0.999973445922621	0.999251497005988	0.999800039992002	1	0.484536082474227	-0.587786664902119	-0.000135217362115187	-2.65544299442586e-05	-0.000748783262241123	-0.000199980002666245	0	-0.724563376793324	0.361689717380922
13	Dofetilide	1	2	11	22	0.531914893617021	0.999851272968186	0.999970790592446	0.999176708330215	0.999780048389354	1	0.46078431372549	-0.631271776841858	-0.000148738092775841	-2.92098341566285e-05	-0.000823630760498481	-0.000219975803548898	0	-0.774825211574213	0.388437849447006
13	Dofetilide	1	2	12	24	0.510204081632653	0.999837754522593	0.999968135276373	0.999101930848675	0.999760057586179	1	0.439252336448598	-0.672944473242426	-0.000162258640628557	-3.18652313177976e-05	-0.000898472657027006	-0.000239971204607236	0	-0.822681232751847	0.414069533506951
13	Dofetilide	1	2	13	26	0.490196078431373	0.999824236442546	0.999965479974402	0.999027164558857	0.999740067582429	1	0.419642857142857	-0.712949807856125	-0.000175779005678548	-3.45206214276907e-05	-0.000973308952665224	-0.000259966205857478	0	-0.868351269585036	0.438674122941137
13	Dofetilide	1	2	14	28	0.471698113207547	0.99981071872803	0.999962824686532	0.998952409458246	0.999720078378054	1	0.401709401709402	-0.751416088683921	-0.000189299187931031	-3.71760044866773e-05	-0.00104813964825156	-0.000279960807315842	0	-0.912026333087698	0.462330655716013
13	Dofetilide	1	2	15	30	0.454545454545455	0.999797201379031	0.999960169412764	0.998877665544332	0.999700089973008	1	0.385245901639344	-0.78845736036427	-0.000202819187390333	-3.98313804944603e-05	-0.00112296474462367	-0.000299955008997996	0	-0.953873443023198	0.485109383540221
13	Dofetilide	1	2	16	32	0.43859649122807	0.999783684395533	0.999957514153098	0.998802932814604	0.999680102367242	1	0.37007874015748	-0.824175442966349	-0.000216339004061782	-4.24867494515199e-05	-0.00119778424261988	-0.000319948810920166	0	-0.994039484748533	0.507073027765019
13	Dofetilide	1	2	17	34	0.423728813559322	0.999770167777522	0.999954858907533	0.998728211266552	0.999660115560709	1	0.356060606060606	-0.858661619037519	-0.000229858637950373	-4.51421113572261e-05	-0.00127259814307743	-0.000339942213098024	0	-1.03265432087631	0.528277818608647
13	Dofetilide	1	2	18	36	0.409836065573771	0.999756651524984	0.999952203676068	0.998653500897666	0.999640129553361	1	0.343065693430657	-0.89199803930511	-0.00024337808906088	-4.77974662123924e-05	-0.00134740644683421	-0.000359935215547691	0	-1.06983332411807	0.548774361071244
13	Dofetilide	1	2	19	38	0.396825396825397	0.999743135637902	0.999949548458706	0.998578801705438	0.999620144345149	1	0.330985915492958	-0.924258901523332	-0.000256897357398188	-5.04528140162775e-05	-0.00142220915472702	-0.000379927818285512	0	-1.1056794558912	0.56860836110673
13	Dofetilide	1	2	20	40	0.384615384615385	0.999729620116263	0.999946893255443	0.99850411368736	0.999600159936026	1	0.319727891156463	-0.955511445027436	-0.000270416442967516	-5.31081547696948e-05	-0.00149700626759323	-0.000399920021326947	0	-1.14028498506868	0.58782123827002
13	Dofetilide	1	2	21	42	0.373134328358209	0.999716104960052	0.999944238066282	0.998429436840924	0.999580176325943	1	0.309210526315789	-0.985816794522765	-0.000283935345773529	-5.57634884720144e-05	-0.00157179778626998	-0.000419911824688346	0	-1.17373291913622	0.606450645492645
13	Dofetilide	1	2	22	44	0.36231884057971	0.999702590169253	0.999941582891222	0.998354771163626	0.999560193514853	1	0.299363057324841	-1.01523067972906	-0.000297454065821225	-5.84188151237164e-05	-0.00164658371159354	-0.000439903228385285	0	-1.20609820363825	0.624530912384984
13	Dofetilide	1	2	23	46	0.352112676056338	0.999689075743852	0.999938927730262	0.998280116652957	0.999540211502709	1	0.290123456790123	-1.04380405217311	-0.000310972603115936	-6.1074134724726e-05	-0.00172136404440107	-0.000459894232434011	0	-1.23744873352233	0.642093425181684
13	Dofetilide	1	2	24	48	0.342465753424658	0.999675561683835	0.999936272583403	0.998205473306415	0.999520230289461	1	0.281437125748503	-1.07158361628019	-0.000324490957661884	-6.37294472748573e-05	-0.0017961387855283	-0.000479884836850773	0	-1.2678462107067	0.659166953894957
13	Dofetilide	1	2	25	50	0.333333333333333	0.999662047989186	0.999933617450644	0.998130841121495	0.999500249875062	1	0.273255813953488	-1.09861228866811	-0.000338009129464513	-6.63847527744794e-05	-0.00187090793581162	-0.000499875041651043	0	-1.29734687510339	0.675777935240594
13	Dofetilide	1	2	26	52	0.324675324675325	0.99964853465989	0.999930962331986	0.998056220095694	0.999480270259465	1	0.265536723163842	-1.12492959698548	-0.000351527118528824	-6.90400512231844e-05	-0.00194567149608733	-0.000519864846851187	0	-1.32600213086377	0.691950718323059
13	Dofetilide	1	2	27	54	0.316455696202532	0.999635021695933	0.999928307227428	0.997981610226508	0.999460291442621	1	0.258241758241758	-1.15057202759882	-0.000365044924859263	-7.16953426216747e-05	-0.00202042946719072	-0.000539854252466685	0	-1.35385908536674	0.70770777881139
13	Dofetilide	1	2	28	56	0.308641975308642	0.999621509097299	0.99992565213697	0.997907011511437	0.999440313424482	1	0.251336898395722	-1.17557332980424	-0.000378562548461164	-7.43506269693202e-05	-0.00209518184995777	-0.000559843258514019	0	-1.38096101514453	0.723069906334178
13	Dofetilide	1	2	29	58	0.301204819277108	0.999607996863975	0.999922997060612	0.997832423947978	0.999420336205001	1	0.244791666666667	-1.1999647829284	-0.000392079989339642	-7.70059042666011e-05	-0.00216992864522367	-0.000579831865009118	0	-1.40734777031772	0.738056369014241
13	Dofetilide	1	2	30	60	0.294117647058824	0.999594484995945	0.999920341998354	0.997757847533632	0.99940035978413	1	0.238578680203046	-1.22377543162212	-0.000405597247499144	-7.96611745133316e-05	-0.00224466985382397	-0.000599820071967583	0	-1.43305612702793	0.752685058409927
13	Dofetilide	1	2	31	62	0.28735632183908	0.999580973493194	0.999917686950195	0.997683282265899	0.99938038416182	1	0.232673267326733	-1.24703229378638	-0.000419114322944784	-8.23164377097698e-05	-0.00231940547659321	-0.000619807879405792	0	-1.45812009569115	0.766972617597924
13	Dofetilide	1	2	32	64	0.280898876404494	0.999567462355708	0.999915031916137	0.997608728142281	0.999360409338024	1	0.227053140096618	-1.26976054486394	-0.0004326312156819	-8.49716938555078e-05	-0.0023941355143666	-0.000639795287339351	0	-1.48257119155531	0.780934554697214
14	Domperidone	1	5.79	1	5.79	0.965492580010728	0.998967139332726	1	1	1	1	1	-0.0351168622692223	-0.00103339443542366	0	0	0	0	0	0.0216320523977691
14	Domperidone	1	5.79	2	11.58	0.933287245074317	0.997936410066327	1	1	1	1	1	-0.0690422529837146	-0.0020657220691206	0	0	0	0	0	0.0425301561043147
14	Domperidone	1	5.79	3	17.37	0.903161063723031	0.996907805610099	1	1	1	1	1	-0.101854376328539	-0.00309698510139693	0	0	0	0	0	0.0627424850429222
14	Domperidone	1	5.79	4	23.16	0.874918988982502	0.995881319400479	1	1	1	1	1	-0.133623980930686	-0.00412718572575968	0	0	0	0	0	0.0823126204992546
14	Domperidone	1	5.79	5	28.95	0.848389630793401	0.994856944900914	1	1	1	1	1	-0.164415278439141	-0.00515632612894273	0	0	0	0	0	0.101280116968379
14	Domperidone	1	5.79	6	34.74	0.823421774931382	0.993834675601714	1	1	1	1	1	-0.194286724852228	-0.00618440849093609	0	0	0	0	0	0.119680983453862
14	Domperidone	1	5.79	7	40.53	0.79988149903718	0.992814505019918	1	1	1	1	1	-0.223291688489505	-0.00721143498501255	0	0	0	0	0	0.137548094939698
14	Domperidone	1	5.79	8	46.32	0.777649769585253	0.99179642669916	1	1	1	1	1	-0.25147902378782	-0.00823740777775604	0	0	0	0	0	0.154911545849749
14	Domperidone	1	5.79	9	52.11	0.756620428751576	0.990780434209525	1	1	1	1	1	-0.278893566418702	-0.00926232902908913	0	0	0	0	0	0.17179895504097
14	Domperidone	1	5.79	10	57.9	0.736698499317872	0.989766521147422	1	1	1	1	1	-0.305576562328331	-0.0102862008922989	0	0	0	0	0	0.188235730092836
14	Domperidone	1	5.79	11	63.69	0.717798750498471	0.988754681135443	1	1	1	1	1	-0.331566041007856	-0.0113090255140663	0	0	0	0	0	0.204245297242544
14	Domperidone	1	5.79	12	69.48	0.699844479004666	0.987744907822234	1	1	1	1	1	-0.356897141473254	-0.012330805034491	0	0	0	0	0	0.219849302189219
14	Domperidone	1	5.79	13	75.27	0.682766468580099	0.986737194882358	1	1	1	1	1	-0.381602397967052	-0.0133515415871198	0	0	0	0	0	0.235067786086698
14	Domperidone	1	5.79	14	81.06	0.666502098247346	0.985731536016166	1	1	1	1	1	-0.40571199121027	-0.0143712372989728	0	0	0	0	0	0.2499193403152
14	Domperidone	1	5.79	15	86.85	0.650994575045208	0.984727924949665	1	1	1	1	1	-0.429253970072179	-0.0153898942905696	0	0	0	0	0	0.264421243030305
14	Domperidone	1	5.79	16	92.64	0.636192271442036	0.983726355434385	1	1	1	1	1	-0.452254447741453	-0.0164075146759567	0	0	0	0	0	0.278589580004748
14	Domperidone	1	5.79	17	98.43	0.622048151134662	0.982726821247256	1	1	1	1	1	-0.474737775839442	-0.0174241005627325	0	0	0	0	0	0.292439351882522
14	Domperidone	1	5.79	18	104.22	0.608519269776876	0.981729316190469	1	1	1	1	1	-0.496726699386489	-0.0184396540520751	0	0	0	0	0	0.305984569638413
14	Domperidone	1	5.79	19	110.01	0.595566339472814	0.980733834091359	1	1	1	1	1	-0.51824249509369	-0.0194541772387669	0	0	0	0	0	0.319238339765985
14	Domperidone	1	5.79	20	115.8	0.583153347732181	0.979740368802267	1	1	1	1	1	-0.539305095087859	-0.0204676722112214	0	0	0	0	0	0.332212940492384
14	Domperidone	1	5.79	21	121.59	0.571247223103777	0.978748914200423	1	1	1	1	1	-0.559933197873019	-0.0214801410515088	0	0	0	0	0	0.344919890130827
14	Domperidone	1	5.79	22	127.38	0.559817540949616	0.977759464187814	1	1	1	1	1	-0.580144368076551	-0.0224915858353815	0	0	0	0	0	0.357370008524412
14	Domperidone	1	5.79	23	133.17	0.548836263847952	0.976772012691059	1	1	1	1	1	-0.5999551263134	-0.0235020086322998	0	0	0	0	0	0.369573472402637
14	Domperidone	1	5.79	24	138.96	0.538277511961722	0.975786553661291	1	1	1	1	1	-0.619381030320336	-0.0245114115054568	0	0	0	0	0	0.381539865360255
14	Domperidone	1	5.79	25	144.75	0.528117359413203	0.974803081074024	1	1	1	1	1	-0.638436748358637	-0.0255197965118052	0	0	0	0	0	0.393278223073465
14	Domperidone	1	5.79	26	150.54	0.518333653292379	0.97382158892904	1	1	1	1	1	-0.657136125752771	-0.02652716570208	0	0	0	0	0	0.40479707428786
14	Domperidone	1	5.79	27	156.33	0.508905852417303	0.972842071250258	1	1	1	1	1	-0.675492245321225	-0.0275335211208259	0	0	0	0	0	0.416104478043932
14	Domperidone	1	5.79	28	162.12	0.499814883376527	0.971864522085621	1	1	1	1	1	-0.69351748236014	-0.0285388648064209	0	0	0	0	0	0.427208057547098
14	Domperidone	1	5.79	29	167.91	0.491043011730472	0.970888935506969	1	1	1	1	1	-0.711223554758569	-0.0295431987911011	0	0	0	0	0	0.438115031038781
14	Domperidone	1	5.79	30	173.7	0.482573726541555	0.969915305609921	1	1	1	1	1	-0.728621568753605	-0.030546525100986	0	0	0	0	0	0.448832239981666
14	Domperidone	1	5.79	31	179.49	0.474391636651146	0.968943626513758	1	1	1	1	1	-0.745722060772851	-0.0315488457561023	0	0	0	0	0	0.459366174834728
14	Domperidone	1	5.79	32	185.28	0.466482377332412	0.967973892361303	1	1	1	1	1	-0.762535035758954	-0.0325501627704092	0	0	0	0	0	0.469722998661227
15	Donepezil	1	6.56	1	6.56	0.993482753139406	0.999829639417284	1	0.999808782926647	1	1	1	-0.00653857683958236	-0.000170375095728637	0	-0.000191235357668246	0	0	0	0.00390817242660099
15	Donepezil	1	6.56	2	13.12	0.987049905243209	0.999659336870137	1	0.999617638967252	1	1	1	-0.0130346782704556	-0.000340721168728783	0	-0.000382434151366441	0	0	0	0.00779020279048639
15	Donepezil	1	6.56	3	19.68	0.98069982739683	0.999489092328908	1	0.999426568079889	1	1	1	-0.0194888525838468	-0.000511038228886368	0	-0.00057359639507447	0	0	0	0.0116464288313274
15	Donepezil	1	6.56	4	26.24	0.974430932335516	0.999318905763968	1	0.999235570222663	1	1	1	-0.0259016375226531	-0.000681326286082927	0	-0.000764722102763169	0	0	0	0.01547718179101
15	Donepezil	1	6.56	5	32.8	0.968241673121611	0.999148777145704	1	0.999044645353714	1	1	1	-0.0322735605502956	-0.000851585350193806	0	-0.000955811288395741	0	0	0	0.0192827865792485
15	Donepezil	1	6.56	6	39.36	0.962130541871921	0.998978706444528	1	0.998853793431211	1	1	1	-0.0386051391110667	-0.0010218154310906	0	-0.00114686396592785	0	0	0	0.0230635619339602
15	Donepezil	1	6.56	7	45.92	0.956096068532966	0.998808693630869	1	0.998663014413357	1	1	1	-0.0448968808822823	-0.0011920165386388	0	-0.00133788014930646	0	0	0	0.0268198205765921
15	Donepezil	1	6.56	8	52.48	0.950136819702037	0.998638738675177	1	0.998472308258385	1	1	1	-0.0511492840185552	-0.00136218868269977	0	-0.00152885985247108	0	0	0	0.030551869362593
15	Donepezil	1	6.56	9	59.04	0.944251397492068	0.998468841547922	1	0.998281674924561	1	1	1	-0.0573628373884756	-0.00153233187312898	0	-0.00171980308935259	0	0	0	0.03426000942721
15	Donepezil	1	6.56	10	65.6	0.938438438438439	0.998299002219595	1	0.998091114370184	1	1	1	-0.0635380208039875	-0.00170244611977764	0	-0.00191070987387488	0	0	0	0.0379445363267837
15	Donepezil	1	6.56	11	72.16	0.932696612445904	0.998129220660705	1	0.997900626553583	1	1	1	-0.0696753052427235	-0.00187253143249114	0	-0.00210158021995308	0	0	0	0.041605740175708
15	Donepezil	1	6.56	12	78.72	0.927024621773954	0.997959496841782	1	0.997710211433119	1	1	1	-0.0757751530635588	-0.00204258782111058	0	-0.00229241414149428	0	0	0	0.0452439057792111
15	Donepezil	1	6.56	13	85.28	0.921421200058971	0.997789830733378	1	0.997519868967186	1	1	1	-0.0818380182156323	-0.00221261529547188	0	-0.00248321165239832	0	0	0	0.0488593127621124
15	Donepezil	1	6.56	14	91.84	0.91588511137163	0.997620222306063	1	0.997329599114208	1	1	1	-0.0878643464410677	-0.00238261386540543	0	-0.0026739727665565	0	0	0	0.0524522356937006
15	Donepezil	1	6.56	15	98.4	0.910415149308084	0.997450671530426	1	0.997139401832643	1	1	1	-0.0938545754716243	-0.00255258354073739	0	-0.00286469749785204	0	0	0	0.0560229442088695
15	Donepezil	1	6.56	16	104.96	0.905010136113525	0.997281178377079	1	0.996949277080979	1	1	1	-0.0998091352194904	-0.00272252433128805	0	-0.00305538586016114	0	0	0	0.0595717031256475
15	Donepezil	1	6.56	17	111.52	0.899668921836764	0.997111742816651	1	0.996759224817735	1	1	1	-0.105728447962434	-0.00289243624687368	0	-0.00324603786735108	0	0	0	0.063098772559251
15	Donepezil	1	6.56	18	118.08	0.894390383514596	0.996942364819794	1	0.996569245001464	1	1	1	-0.1116129285235	-0.0030623192973044	0	-0.0034366535332813	0	0	0	0.0666044080327788
15	Donepezil	1	6.56	19	124.64	0.889173424384692	0.996773044357177	1	0.996379337590749	1	1	1	-0.117462984445458	-0.00323217349238651	0	-0.00362723287180415	0	0	0	0.0700888605846701
15	Donepezil	1	6.56	20	131.2	0.884016973125884	0.996603781399491	1	0.996189502544204	1	1	1	-0.123279016160171	-0.00340199884192025	0	-0.00381777589676335	0	0	0	0.0735523768730382
15	Donepezil	1	6.56	21	137.76	0.878919983124736	0.996434575917444	1	0.995999739820476	1	1	1	-0.129061417153071	-0.00357179535570191	0	-0.00400828262199455	0	0	0	0.0769951992769869
15	Donepezil	1	6.56	22	144.32	0.873881431767338	0.996265427881769	1	0.995810049378243	1	1	1	-0.134810574122903	-0.00374156304352168	0	-0.00419875306132596	0	0	0	0.0804175659950138
15	Donepezil	1	6.56	23	150.88	0.868900319755318	0.996096337263214	1	0.995620431176214	1	1	1	-0.140526867136909	-0.00391130191516556	0	-0.00438918722857781	0	0	0	0.083819711140602
15	Donepezil	1	6.56	24	157.44	0.86397567044512	0.995927304032548	1	0.995430885173129	1	1	1	-0.146210669781596	-0.00408101198041464	0	-0.00457958513756244	0	0	0	0.0872018648350955
15	Donepezil	1	6.56	25	164	0.859106529209622	0.995758328160563	1	0.995241411327762	1	1	1	-0.151862349309246	-0.00425069324904434	0	-0.00476994680208379	0	0	0	0.0905642532979489
15	Donepezil	1	6.56	26	170.56	0.854291962821214	0.995589409618066	1	0.995052009598916	1	1	1	-0.157482266780309	-0.00442034573082583	0	-0.00496027223593885	0	0	0	0.0939070989344412
15	Donepezil	1	6.56	27	177.12	0.849531058855512	0.995420548375887	1	0.994862679945425	1	1	1	-0.163070777201817	-0.00458996943552445	0	-0.00515056145291599	0	0	0	0.0972306204209401
15	Donepezil	1	6.56	28	183.68	0.844822925114896	0.995251744404876	1	0.994673422326156	1	1	1	-0.168628229661952	-0.00475956437290174	0	-0.00534081446679588	0	0	0	0.100535032787795
15	Donepezil	1	6.56	29	190.24	0.840166689071112	0.9950829976759	1	0.994484236700006	1	1	1	-0.174154967460894	-0.00492913055271312	0	-0.0055310312913516	0	0	0	0.103820547499942
15	Donepezil	1	6.56	30	196.8	0.835561497326203	0.994914308159848	1	0.994295123025904	1	1	1	-0.179651328238076	-0.00509866798470998	0	-0.00572121194034813	0	0	0	0.107087372535288
15	Donepezil	1	6.56	31	203.36	0.831006515091078	0.994745675827628	1	0.99410608126281	1	1	1	-0.185117644095956	-0.00526817667863781	0	-0.00591135642754242	0	0	0	0.110335712460963
15	Donepezil	1	6.56	32	209.92	0.826500925681037	0.994577100650169	1	0.993917111369716	1	1	1	-0.190554241720431	-0.00543765664423821	0	-0.006101464766684	0	0	0	0.113565768507484
16	Dronedarone	1	1.8	1	1.8	0.965811965811966	0.997435166714163	1	0.989979402104326	0.999820032394169	1	1	-0.0347861160854157	-0.00256812810571021	0	-0.010071142025175	-0.000179983801943842	0	0	0.0152069466902564
16	Dronedarone	1	1.8	2	3.6	0.933884297520661	0.99488345650938	1	0.980157636554043	0.999640129553361	1	1	-0.0684027268844006	-0.00512967781999839	0	-0.0200418666265025	-0.000359935215547691	0	0	0.0297562654294794
16	Dronedarone	1	1.8	3	5.4	0.904	0.992344768925432	1	0.97052884352999	0.999460291442621	1	1	-0.100925918589961	-0.007684682758547	0	-0.0299141565365144	-0.000539854252466685	0	0	0.0436935854117429
16	Dronedarone	1	1.8	4	7.2	0.875968992248062	0.989819004524887	1	0.961087391233854	0.99928051802702	1	1	-0.132424585649332	-0.010233176280029	0	-0.0396899363380557	-0.000719740924348951	0	0	0.0570601420705342
16	Dronedarone	1	1.8	5	9	0.849624060150376	0.987306064880113	1	0.951827864903923	0.999100809271656	1	1	-0.162961309509413	-0.0127751914887229	0	-0.0493710747161767	-0.000899595242836038	0	0	0.0698933169791864
16	Dronedarone	1	1.8	6	10.8	0.824817518248175	0.984805852560495	1	0.942745056459736	0.998921165141647	1	1	-0.192593107115784	-0.0153107612370916	0	-0.0589593866020639	-0.00107941721956411	0	0	0.0822270975867999
16	Dronedarone	1	1.8	7	12.6	0.801418439716312	0.982318271119843	1	0.933833954734023	0.998741585602141	1	1	-0.221372071665828	-0.017839918128331	0	-0.068456635215156	-0.00125920686616261	0	0	0.0940924706461695
16	Dronedarone	1	1.8	8	14.4	0.779310344827586	0.979843225083987	1	0.925089736253446	0.998562070618309	1	1	-0.249345923708234	-0.0203626945188845	0	-0.0778645340091996	-0.00143896419425443	0	0	0.105517760474994
16	Dronedarone	1	1.8	9	16.2	0.758389261744966	0.977380619938565	1	0.916507756532495	0.998382620155348	1	1	-0.276558487233119	-0.0228791225209277	0	-0.0871847485276119	-0.0016186892154563	0	0	0.116528921067886
16	Dronedarone	1	1.8	10	18	0.738562091503268	0.974930362116992	1	0.908083541847521	0.998203234178479	1	1	-0.303050102680095	-0.0253892340048196	0	-0.0964188981731758	-0.00179838194137944	0	0	0.127149789403303
16	Dronedarone	1	1.8	11	19.8	0.719745222929936	0.972492358988608	1	0.899812781460305	0.998023912652947	1	1	-0.328857986635967	-0.0278930606015256	0	-0.105568557896774	-0.00197804238362776	0	0	0.137402305961823
16	Dronedarone	1	1.8	12	21.6	0.701863354037267	0.970066518847007	1	0.891691320262749	0.997844655544025	1	1	-0.354016546272122	-0.0303906337050093	0	-0.114635259809561	-0.00215767055379932	0	0	0.147306707411868
16	Dronedarone	1	1.8	13	23.4	0.684848484848485	0.967652750898535	1	0.88371515181633	0.997665462817008	1	1	-0.37855765518824	-0.0328819844745928	0	-0.123620494722708	-0.00233726646348647	0	0	0.156881695566954
16	Dronedarone	1	1.8	14	25.2	0.668639053254438	0.965250965250965	1	0.875880411761809	0.997486334437218	1	1	-0.402510896210733	-0.0353671438372914	0	-0.132525713618581	-0.00251683012427447	0	0	0.166144586029868
16	Dronedarone	1	1.8	15	27	0.653179190751445	0.962861072902338	1	0.868183371576429	0.997307270370001	1	1	-0.425903775785438	-0.0378461424901146	0	-0.141352329056995	-0.0026963615477425	0	0	0.175111439379463
16	Dronedarone	1	1.8	16	28.8	0.638418079096045	0.960482985729967	1	0.860620432657407	0.997128270580728	1	1	-0.448761913861489	-0.0403190109023439	0	-0.150101716519944	-0.00287586074546426	0	0	0.18379717729845
16	Dronedarone	1	1.8	17	30.6	0.624309392265193	0.958116616479606	1	0.85318812071199	0.996949335034793	1	1	-0.471109212553485	-0.0427857793177776	0	-0.15877521569801	-0.00305532772900636	0	0	0.192215685665056
16	Dronedarone	1	1.8	18	32.4	0.610810810810811	0.955761878754779	1	0.845883080435713	0.99677046369762	1	1	-0.492968006365984	-0.045246477756951	0	-0.167374131721465	-0.00323476250992924	0	0	0.200379906321631
16	Dronedarone	1	1.8	19	34.2	0.597883597883598	0.953418687006265	1	0.838702070461727	0.996591656534652	1	1	-0.514359196347302	-0.0477011360193293	0	-0.17589973633889	-0.00341416509978782	0	0	0.208301918976504
16	Dronedarone	1	1.8	20	36	0.585492227979275	0.951086956521739	1	0.831641958565215	0.996412913511359	1	1	-0.535302370192545	-0.0501497836854716	0	-0.184353269045975	-0.0035935355101302	0	0	0.215993014481695
16	Dronedarone	1	1.8	21	37.8	0.573604060913706	0.94876660341556	1	0.824699717108009	0.996234234593238	1	1	-0.555815910025648	-0.0525924501191706	0	-0.192735938167005	-0.00377287375249815	0	0	0.223463760550461
16	Dronedarone	1	1.8	22	39.6	0.562189054726368	0.946457544618713	1	0.81787241870947	0.996055619745807	1	1	-0.575917089346735	-0.055029164469565	0	-0.201048921891398	-0.00395217983842789	0	0	0.230724060828781
16	Dronedarone	1	1.8	23	41.4	0.551219512195122	0.944159697868897	1	0.811157232130639	0.995877068934611	1	1	-0.595622160426068	-0.0574599556732273	0	-0.209293369267504	-0.00413145377944894	0	0	0.237783208108642
16	Dronedarone	1	1.8	24	43.2	0.54066985645933	0.941872981700753	1	0.804551418359499	0.995698582125219	1	1	-0.61494643325247	-0.0598848524562242	0	-0.217470401155782	-0.0043106955870846	0	0	0.244649932364276
16	Dronedarone	1	1.8	25	45	0.530516431924883	0.939597315436242	1	0.798052326885967	0.995520159283226	1	1	-0.633904346997085	-0.0623038833361549	0	-0.225581111143308	-0.00448990527285197	0	0	0.251332444202013
16	Dronedarone	1	1.8	26	46.8	0.52073732718894	0.937332619175147	1	0.79165739215599	0.995341800374248	1	1	-0.652509534828119	-0.064717076624163	0	-0.23362656642151	-0.00466908284826254	0	0	0.25783847423733
16	Dronedarone	1	1.8	27	48.6	0.51131221719457	0.935078813785733	1	0.785364130194762	0.995163505363931	1	1	-0.670774882805412	-0.0671244604269239	0	-0.241607808628861	-0.00484822832482083	0	0	0.264175308846971
16	Dronedarone	1	1.8	28	50.4	0.502222222222222	0.932835820895522	1	0.779170135389738	0.994985274217942	1	1	-0.68871258349208	-0.0695260626486103	0	-0.249525854660217	-0.00502734171402524	0	0	0.270349822687644
16	Dronedarone	1	1.8	29	52.2	0.493449781659389	0.930603562882212	1	0.773073077424684	0.994807106901972	1	1	-0.706334184841899	-0.0719219109928313	0	-0.257381697444358	-0.00520642302736895	0	0	0.276368508324445
16	Dronedarone	1	1.8	30	54	0.484978540772532	0.928381962864721	1	0.767070698356554	0.994629003381739	1	1	-0.72365063485336	-0.0743120329645515	0	-0.265176306691233	-0.00538547227633789	0	0	0.282237503270499
16	Dronedarone	1	1.8	31	55.8	0.476793248945148	0.926170944694364	1	0.761160809827505	0.994450963622984	1	1	-0.740672322422791	-0.0766964558719838	0	-0.272910629610297	-0.00556448947241203	0	0	0.287962614703286
16	Dronedarone	1	1.8	32	57.6	0.468879668049793	0.923970432946146	1	0.755341290404791	0.994272987591473	1	1	-0.757409114778314	-0.0790752068284639	0	-0.280585591601289	-0.00574347462706575	0	0	0.29354934209201
17	Droperidol	1	16	1	16	0.801734820322181	0.999295650642719	1	0.997899159663865	1	1	1	-0.220977373769048	-0.000704597527829046	0	-0.0021030501967789	0	0	0	0.134807176118338
17	Droperidol	1	16	2	32	0.669079627714581	0.998592292803097	1	0.9958071278826	1	1	1	-0.401852200952394	-0.00140869894751811	0	-0.00420168685369997	0	0	0	0.244913869368365
17	Droperidol	1	16	3	48	0.574090505767525	0.997889924388957	1	0.993723849372385	1	1	1	-0.554968219538876	-0.00211230495719612	0	-0.00629592845681481	0	0	0	0.33792383372173
17	Droperidol	1	16	4	64	0.502719502719503	0.997188543314005	1	0.991649269311065	1	1	1	-0.687722913095226	-0.00281541625352051	0	-0.00838579337627396	0	0	0	0.418393921309428
17	Droperidol	1	16	5	80	0.44713199723566	0.996488147497805	1	0.989583333333333	1	1	1	-0.804901432130583	-0.00351803353167906	0	-0.0104712998672955	0	0	0	0.489271782317677
17	Droperidol	1	16	6	96	0.40261356565028	0.995788734865766	1	0.987525987525988	1	1	1	-0.909778071236612	-0.00422015748539615	0	-0.0125524660711199	0	0	0	0.552574376951955
17	Droperidol	1	16	7	112	0.366157328805886	0.995090303349115	1	0.985477178423237	1	1	1	-1.0046921778188	-0.00492178880693541	0	-0.014629310015959	0	0	0	0.609742736284803
17	Droperidol	1	16	8	128	0.335755059678256	0.994392850884878	1	0.98343685300207	1	1	1	-1.09137337391347	-0.00562292818710472	0	-0.0167018496179316	0	0	0	0.661842299498726
17	Droperidol	1	16	9	144	0.310014374700527	0.993696375415864	1	0.981404958677686	1	1	1	-1.1711366125763	-0.00632357631525942	0	-0.0187701026819905	0	0	0	0.709683068983302
17	Droperidol	1	16	10	160	0.287939474855363	0.993000874890639	1	0.979381443298969	1	1	1	-1.24500497768443	-0.00702373387930768	0	-0.020834086902842	0	0	0	0.753895255240841
17	Droperidol	1	16	11	176	0.268799335272123	0.992306347263508	1	0.977366255144033	1	1	1	-1.31379014328217	-0.00772340156571273	0	-0.0228938198658525	0	0	0	0.794978839992269
17	Droperidol	1	16	12	192	0.252045188936502	0.991612790494496	1	0.975359342915811	1	1	1	-1.37814688637024	-0.00842258005949872	0	-0.0249493190479486	0	0	0	0.833337156155988
17	Droperidol	1	16	13	208	0.237257059039237	0.990920202549328	1	0.973360655737705	1	1	1	-1.43861108834469	-0.00912127004425385	0	-0.0270006018185059	0	0	0	0.869300296804313
17	Droperidol	1	16	14	224	0.224108070661586	0.990228581399407	1	0.971370143149284	1	1	1	-1.49562688516203	-0.00981947220213394	0	-0.0290476854402308	0	0	0	0.903141839715073
17	Droperidol	1	16	15	240	0.212340006563833	0.989537925021796	1	0.969387755102041	1	1	1	-1.54956648448481	-0.0105171872138677	0	-0.0310905870700312	0	0	0	0.935091054769541
17	Droperidol	1	16	16	256	0.201746180230745	0.988848231399199	1	0.967413441955194	1	1	1	-1.60074490519225	-0.0112144157587591	0	-0.0331293237598793	0	0	0	0.965341983517872
17	Droperidol	1	16	17	272	0.192159192159192	0.988159498519937	1	0.965447154471545	1	1	1	-1.64943112466017	-0.0119111585146932	0	-0.035163912457667	0	0	0	0.994060305923657
17	Droperidol	1	16	18	288	0.183442018712787	0.987471724377936	1	0.963488843813388	1	1	1	-1.69585663573515	-0.012607416158138	0	-0.0371943700080488	0	0	0	1.02138861147542
17	Droperidol	1	16	19	304	0.175481421209656	0.9867849069727	1	0.961538461538461	1	1	1	-1.74022210373324	-0.0133031893641509	0	-0.0392207131532814	0	0	0	1.04745049990964
17	Droperidol	1	16	20	320	0.168182999740057	0.986099044309296	1	0.95959595959596	1	1	1	-1.78270260825139	-0.0139984788063796	0	-0.041242958534049	0	0	0	1.07235381017584
17	Droperidol	1	16	21	336	0.16146743199401	0.985414134398333	1	0.957661290322581	1	1	1	-1.82345181613524	-0.0146932851570691	0	-0.0432611226902863	0	0	0	1.09619319099194
17	Droperidol	1	16	22	352	0.155267578593713	0.984730175255943	1	0.955734406438632	1	1	1	-1.86260533692155	-0.0153876090870629	0	-0.0452752220619876	0	0	0	1.11905216780258
17	Droperidol	1	16	23	368	0.149526230644789	0.984047164903763	1	0.953815261044177	1	1	1	-1.90028344572398	-0.0160814512658091	0	-0.0472852729900117	0	0	0	1.14100482008125
17	Droperidol	1	16	24	384	0.14419433920214	0.983365101368914	1	0.95190380761523	1	1	1	-1.93659331147508	-0.016774812361363	0	-0.0492912917168775	0	0	0	1.16211715393105
17	Droperidol	1	16	25	400	0.139229610501399	0.982683982683983	1	0.95	1	1	1	-1.97163083458408	-0.0174676930403908	0	-0.0512932943875505	0	0	0	1.1824482340848
17	Droperidol	1	16	26	416	0.13459538173497	0.982003806887005	1	0.94810379241517	1	1	1	-2.00548217339306	-0.0181600939681746	0	-0.0532912970502236	0	0	0	1.20205112420437
17	Droperidol	1	16	27	432	0.130259714113147	0.981324572021442	1	0.946215139442231	1	1	1	-2.03822502060645	-0.0188520158086148	0	-0.0552853156570879	0	0	0	1.22097367316315
17	Droperidol	1	16	28	448	0.1261946557441	0.980646276136167	1	0.944333996023857	1	1	1	-2.0699296772828	-0.0195434592242354	0	-0.057275366065098	0	0	0	1.23925917662651
17	Droperidol	1	16	29	464	0.122375638358237	0.979968917285443	1	0.942460317460317	1	1	1	-2.10065996173455	-0.0202344248761863	0	-0.0592614640367275	0	0	0	1.25694693693524
17	Droperidol	1	16	30	480	0.118780980356159	0.979292493528904	1	0.940594059405941	1	1	1	-2.13047398288277	-0.0209249134242488	0	-0.0612436252407186	0	0	0	1.27407273949309
17	Droperidol	1	16	31	496	0.115391474942037	0.97861700293154	1	0.938735177865613	1	1	1	-2.15942480162277	-0.0216149255268371	0	-0.0632218652528244	0	0	0	1.29066926016871
17	Droperidol	1	16	32	512	0.112190046818103	0.977942443563674	1	0.936883629191322	1	1	1	-2.18756099911451	-0.0223044618410049	0	-0.0651961995565419	0	0	0	1.30676641536313
18	Erythromycin	1	8516	1	8516	0.820398177830268	1	1	1	1	1	1	-0.197965473861136	0	0	0	0	0	0	0.121947099677711
18	Erythromycin	1	8516	2	17032	0.695487377529858	1	1	1	1	1	1	-0.363142416554204	0	0	0	0	0	0	0.223696403241524
18	Erythromycin	1	8516	3	25548	0.603587388282026	1	1	1	1	1	1	-0.504864446471696	0	0	0	0	0	0	0.310997436961166
18	Erythromycin	1	8516	4	34064	0.533139630502714	1	1	1	1	1	1	-0.628971918200267	0	0	0	0	0	0	0.387447870112196
18	Erythromycin	1	8516	5	42580	0.477417771232204	1	1	1	1	1	1	-0.739363340734204	0	0	0	0	0	0	0.455449191477724
18	Erythromycin	1	8516	6	51096	0.432241432952576	1	1	1	1	1	1	-0.838770974273736	0	0	0	0	0	0	0.516684478417072
18	Erythromycin	1	8516	7	59612	0.394875751177521	1	1	1	1	1	1	-0.929184117544454	0	0	0	0	0	0	0.572379142640911
18	Erythromycin	1	8516	8	68128	0.363456291811489	1	1	1	1	1	1	-1.01209623184767	0	0	0	0	0	0	0.623453159085397
18	Erythromycin	1	8516	9	76644	0.336668282212837	1	1	1	1	1	1	-1.08865715917446	0	0	0	0	0	0	0.670614832553204
18	Erythromycin	1	8516	10	85160	0.313557955827825	1	1	1	1	1	1	-1.15977106892057	0	0	0	0	0	0	0.714421133071865
18	Erythromycin	1	8516	11	93676	0.29341660632392	1	1	1	1	1	1	-1.22616181527059	0	0	0	0	0	0	0.755317956163868
18	Erythromycin	1	8516	12	102192	0.275706631134295	1	1	1	1	1	1	-1.28841790924926	0	0	0	0	0	0	0.793667825713785
18	Erythromycin	1	8516	13	110708	0.260012833538313	1	1	1	1	1	1	-1.34702428942202	0	0	0	0	0	0	0.829769464778838
18	Erythromycin	1	8516	14	119224	0.246009460929397	1	1	1	1	1	1	-1.40238528472671	0	0	0	0	0	0	0.863871940735906
18	Erythromycin	1	8516	15	127740	0.233437349975996	1	1	1	1	1	1	-1.45484154632832	0	0	0	0	0	0	0.896185095335468
18	Erythromycin	1	8516	16	136256	0.222087738929868	1	1	1	1	1	1	-1.50468275478406	0	0	0	0	0	0	0.926887372338948
18	Erythromycin	1	8516	17	144772	0.211790583213555	1	1	1	1	1	1	-1.55215730755133	0	0	0	0	0	0	0.956131785041571
18	Erythromycin	1	8516	18	153288	0.202405977480384	1	1	1	1	1	1	-1.59747980899907	0	0	0	0	0	0	0.98405053013329
18	Erythromycin	1	8516	19	161804	0.193817761479592	1	1	1	1	1	1	-1.64083693522343	0	0	0	0	0	0	1.01075860043615
18	Erythromycin	1	8516	20	170320	0.185928687505975	1	1	1	1	1	1	-1.68239207929121	0	0	0	0	0	0	1.03635664638284
18	Erythromycin	1	8516	21	178836	0.178656721901753	1	1	1	1	1	1	-1.72228906912623	0	0	0	0	0	0	1.06093326624163
18	Erythromycin	1	8516	22	187352	0.171932181814967	1	1	1	1	1	1	-1.76065517169557	0	0	0	0	0	0	1.08456685670069
18	Erythromycin	1	8516	23	195868	0.165695495127104	1	1	1	1	1	1	-1.79760354184071	0	0	0	0	0	0	1.1073271213526
18	Erythromycin	1	8516	24	204384	0.159895430854475	1	1	1	1	1	1	-1.83323523456942	0	0	0	0	0	0	1.12927631026986
18	Erythromycin	1	8516	25	212900	0.154487688641779	1	1	1	1	1	1	-1.86764087098585	0	0	0	0	0	0	1.15047024622099
18	Erythromycin	1	8516	26	221416	0.149433765116243	1	1	1	1	1	1	-1.90090202702452	0	0	0	0	0	0	1.17095918013322
18	Erythromycin	1	8516	27	229932	0.144700035710035	1	1	1	1	1	1	-1.93309239855804	0	0	0	0	0	0	1.19078850880098
18	Erythromycin	1	8516	28	238448	0.140257005639125	1	1	1	1	1	1	-1.96427878474574	0	0	0	0	0	0	1.20999938063051
18	Erythromycin	1	8516	29	246964	0.136078694763944	1	1	1	1	1	1	-1.99452192262231	0	0	0	0	0	0	1.22862920974803
18	Erythromycin	1	8516	30	255480	0.132142129220735	1	1	1	1	1	1	-2.02387719914004	0	0	0	0	0	0	1.24671211461903
18	Erythromycin	1	8516	31	263996	0.128426918810417	1	1	1	1	1	1	-2.05239526164315	0	0	0	0	0	0	1.26427929410166
18	Erythromycin	1	8516	32	272512	0.124914903728822	1	1	1	1	1	1	-2.08012254367849	0	0	0	0	0	0	1.28135935134703
19	Flecainide	1	1448	1	1448	0.508819538670285	0.800220750551876	0.928733143025888	0.947908984620919	0.93248787765759	1	0.864849729326115	-0.675661866218926	-0.222867651188305	-0.0739338332888942	-0.0534967891199981	-0.0698991273796672	0	-0.145199510464312	0.397174948668
19	Flecainide	1	1448	2	2896	0.341219290263876	0.666973321067157	0.866948451713682	0.90097621856354	0.873515024458421	1	0.761881269528038	-1.07522992843321	-0.405005232266535	-0.142775759893411	-0.104276416213217	-0.135229949260104	0	-0.271964549703461	0.625087191567503
19	Flecainide	1	1448	3	4344	0.256673511293635	0.571766561514196	0.812871543034376	0.858471663381498	0.821557673348669	1	0.680822924320353	-1.35995038578029	-0.559024480142496	-0.207182185565972	-0.152601606316322	-0.196553139040679	0	-0.384453029668918	0.783002682724586
19	Flecainide	1	1448	4	5792	0.205704882062534	0.500345065562457	0.765144757116211	0.819796835866403	0.775434243176179	1	0.615353964669943	-1.58131274870825	-0.692457287466008	-0.26769023806788	-0.198698730560232	-0.254332092770227	0	-0.485557624433474	0.902583176679874
19	Flecainide	1	1448	5	7240	0.17162471395881	0.44478527607362	0.722711604749138	0.784456452165111	0.734214390602056	1	0.561371622440325	-1.76244508155928	-0.810163638946133	-0.324745023330579	-0.242764218655589	-0.308954207727321	0	-0.577372164176036	0.998025226170848
19	Flecainide	1	1448	6	8688	0.147232037691402	0.400331308669244	0.684737644241237	0.752037103103817	0.697155605131065	1	0.51609669154506	-1.91574544900905	-0.915462803028739	-0.378719515191253	-0.284969617015638	-0.360746643308786	0	-0.66146114434004	1.07692059467039
19	Flecainide	1	1448	7	10136	0.128910278446201	0.363955823293173	0.650555057574295	0.722191007386496	0.663658083355455	1	0.47757963096588	-2.04863863252479	-1.01072278328987	-0.4299293457576	-0.325465621910437	-0.409988196835749	0	-0.739024366544635	1.14380186169327
19	Flecainide	1	1448	8	11584	0.114643839804341	0.333640128854119	0.619623038024562	0.694623485837057	0.63323201621074	1	0.444412470023981	-2.16592500156797	-1.09769232540175	-0.478643989038082	-0.36438532721231	-0.45691838969708	0	-0.811002161250354	1.20158884324892
19	Flecainide	1	1448	9	13032	0.103220478943022	0.307986406117247	0.591498965582095	0.669083198963981	0.605473480261565	1	0.415552964391425	-2.27088800625079	-1.17769963296555	-0.525095344369798	-0.401846863411508	-0.501744515029798	0	-0.878145201350923	1.25227037468968
19	Flecainide	1	1448	10	14480	0.0938673341677096	0.285996055226824	0.565817091454273	0.645354461847439	0.580046403712297	1	0.390213088520172	-2.36587283222996	-1.25177726117061	-0.569484412981174	-0.437955559883609	-0.544647172241501	0	-0.941062308249144	1.29726037916158
19	Flecainide	1	1448	11	15928	0.0860683956851044	0.266936671575847	0.542272544399103	0.623251138312341	0.55666889334224	1	0.367785980789077	-2.45261300014703	-1.32074383382391	-0.611986554484065	-0.472805730166433	-0.585784662231446	0	-1.00025408393565	1.33759871552972
19	Flecainide	1	1448	12	17376	0.0794659885568977	0.25025888850535	0.520609170667108	0.60261174829333	0.535102739726027	1	0.347796711958562	-2.53242616575598	-1.38525934291468	-0.6527556710042	-0.506482156469791	-0.625296513651771	0	-1.05613713093481	1.37407149485199
19	Flecainide	1	1448	13	18824	0.0738043692186577	0.235542560103964	0.500610176685945	0.583295516176519	0.515145270966412	1	0.329868280526878	-2.60633734562332	-1.44586365954415	-0.691927571213977	-0.539061332245885	-0.663306338548924	0	-1.1090618541217	1.4072867272011
19	Flecainide	1	1448	14	20272	0.0688958295057873	0.222460877569807	0.482090848704716	0.565179155539826	0.496622963845848	1	0.313697609858487	-2.67515963246379	-1.50300402398289	-0.729622699902319	-0.570612508646912	-0.699924164838969	0	-1.15932578300966	1.43772381385214
19	Flecainide	1	1448	15	21720	0.0645994832041344	0.210755813953488	0.464892830746489	0.548154235013886	0.479386385426654	1	0.299038275350158	-2.73954886816158	-1.55705509551277	-0.765948371470348	-0.601198580878688	-0.735248356578581	0	-1.20718370257964	1.46576702512059
19	Flecainide	1	1448	16	23168	0.0608075239176261	0.2002209334438	0.448879585137257	0.5321250063109	0.463306152705708	1	0.285687858420176	-2.80004174902108	-1.60833385491097	-0.80100061175733	-0.630876842974013	-0.769367206471355	0	-1.25285546830273	1.49172879658431
19	Flecainide	1	1448	17	24616	0.0574360545259611	0.190689110994214	0.433932759968726	0.517006602505617	0.44826967903891	1	0.273478543179269	-2.85708304521622	-1.6571108681937	-0.834865687832408	-0.659699633751353	-0.802360265533261	0	-1.2965321129243	1.51586634063597
19	Flecainide	1	1448	18	26064	0.0544188071397475	0.18202360030128	0.419949258913072	0.502723534967136	0.434178534213269	1	0.262270025474101	-2.9110454653868	-1.70361892832697	-0.867621387114826	-0.68771489225768	-0.834299460315829	0	-1.3383806743766	1.53839374569039
19	Flecainide	1	1448	19	27512	0.0517027436922653	0.174111431316042	0.406838859902548	0.489208432739526	0.420946287253746	1	0.25194409701452	-2.962244429393	-1.74805977488018	-0.899338093552559	-0.714966637501813	-0.865250037159568	0	-1.3785480533242	1.55949095468785
19	Flecainide	1	1448	20	28960	0.0492449113591596	0.166858457997698	0.394522266360025	0.476400979940155	0.408496732026144	1	0.24240046041961	-3.01094923935885	-1.79060938284482	-0.930079698311747	-0.741495384533849	-0.89527136465008	0	-1.41716412536795	1.57931053876279
19	Flecainide	1	1448	21	30408	0.0470101541933058	0.160185594343791	0.38292950200901	0.464247015812888	0.396762418663704	1	0.233553460704744	-3.05739165394072	-1.83142217133881	-0.959904374605651	-0.767338506744374	-0.924417619085763	0	-1.45434427431146	1.59798288334894
19	Flecainide	1	1448	22	31856	0.0449694207938602	0.154025918844274	0.371998580609549	0.452697769111166	0.385683431039803	1	0.225329507319683	-3.10177255811657	-1.87063438654647	-0.988865240281997	-0.79253055251533	-0.952738372845201	0	-1.49019147110195	1.61562021164884
19	Flecainide	1	1448	23	33304	0.0430984944259281	0.148322422258592	0.361674397209338	0.441709203986355	0.375206363499925	1	0.217665022316185	-3.14426721459561	-1.90836684599676	-1.01701092713176	-0.817103522955021	-0.980279101706245	0	-1.5247979928456	1.63231974358841
19	Flecainide	1	1448	24	34752	0.0413770274743462	0.143026237916749	0.351907799037708	0.431241458883988	0.365283459964933	1	0.210504793493571	-3.18502944408437	-1.94472718361767	-1.04438607224685	-0.841087116319103	-1.00708162415579	0	-1.55824685417802	1.64816620301743
19	Flecainide	1	1448	25	36200	0.0397877984084881	0.138095238095238	0.342654802978028	0.421258363376206	0.355871886120996	1	0.203800642238156	-3.2241949863458	-1.97981170073099	-1.07103174389393	-0.864508943800586	-1.03318448334565	0	-1.5906130068827	1.66323382736635
19	Flecainide	1	1448	26	37648	0.0383161336466742	0.133492911066102	0.333875933330974	0.411727020586742	0.346933111296142	1	0.197510338065396	-3.26188422745541	-2.01370690318017	-1.0969858121056	-0.887394720621443	-1.05862328045175	0	-1.62196435137598	1.67758799311794
19	Flecainide	1	1448	27	39096	0.0369494531480934	0.129187455452602	0.325535658834489	0.402617445049698	0.338432381210234	1	0.191596708159299	-3.29820443147841	-2.04649078636768	-1.12228327238297	-0.909768435742285	-1.08343096667245	0	-1.65236259438995	1.69128654150251
19	Flecainide	1	1448	28	40544	0.0356769099039102	0.125151044363887	0.317601912007271	0.393902247602532	0.330338266384778	1	0.186026902228468	-3.33325158085294	-2.07823391624195	-1.14695652945325	-0.931652502998372	-1.10763809987542	0	-1.68186398009074	1.70438086801615
19	Flecainide	1	1448	29	41992	0.0344891014439437	0.121359223300971	0.310045677105583	0.385556360337423	0.322622273841786	1	0.180771781965742	-3.36711190502734	-2.10900034392138	-1.17103564685535	-0.953067896049138	-1.13127307090766	0	-1.71051991640308	1.71691682420638
19	Flecainide	1	1448	30	43440	0.0333778371161549	0.117790414297319	0.302840635532017	0.377556795793063	0.315258511979823	1	0.175805411148636	-3.39986315864902	-2.13884838376388	-1.19454856717567	-0.974034269177934	-1.1543623037726	0	-1.73837751406462	1.72893546899903
19	Flecainide	1	1448	31	44888	0.0323359489523153	0.114425505050505	0.295962859562722	0.369882435515003	0.308223400320552	1	0.171104627543672	-3.43157569698629	-2.16783127863959	-1.21752130698092	-0.994570065685849	-1.17693043321405	0	-1.7654800526071	1.74047369851387
19	Flecainide	1	1448	32	46336	0.0313571368843549	0.111247506521406	0.289390546882189	0.362513843889084	0.301495417269658	1	0.166648681702097	-3.4623133859984	-2.19599777147771	-1.23997812985803	-1.01469261537778	-1.19900046269938	0	-1.79186738483815	1.75156477704574
20	Gatifloxacin	1	9000	1	9000	0.738372093023256	1	1	1	1	1	1	-0.303307390354862	0	0	0	0	0	0	0.186837915941522
20	Gatifloxacin	1	9000	2	18000	0.585253456221198	1	1	1	1	1	1	-0.535710267081868	0	0	0	0	0	0	0.329998519762241
20	Gatifloxacin	1	9000	3	27000	0.484732824427481	1	1	1	1	1	1	-0.724157417302505	0	0	0	0	0	0	0.44608231439431
20	Gatifloxacin	1	9000	4	36000	0.413680781758958	1	1	1	1	1	1	-0.882660661128606	0	0	0	0	0	0	0.543720607057708
20	Gatifloxacin	1	9000	5	45000	0.360795454545455	1	1	1	1	1	1	-1.01944408913951	0	0	0	0	0	0	0.62797945282798
20	Gatifloxacin	1	9000	6	54000	0.319899244332494	1	1	1	1	1	1	-1.1397491942286	0	0	0	0	0	0	0.702087621065073
20	Gatifloxacin	1	9000	7	63000	0.287330316742081	1	1	1	1	1	1	-1.24712279561911	0	0	0	0	0	0	0.768229958999757
20	Gatifloxacin	1	9000	8	72000	0.260780287474333	1	1	1	1	1	1	-1.344077036624	0	0	0	0	0	0	0.827953951579865
20	Gatifloxacin	1	9000	9	81000	0.238721804511278	1	1	1	1	1	1	-1.43245640288305	0	0	0	0	0	0	0.88239580538618
20	Gatifloxacin	1	9000	10	90000	0.220103986135182	1	1	1	1	1	1	-1.51365518004951	0	0	0	0	0	0	0.932414402971392
20	Gatifloxacin	1	9000	11	99000	0.204180064308682	1	1	1	1	1	1	-1.58875300628059	0	0	0	0	0	0	0.978674803446097
20	Gatifloxacin	1	9000	12	108000	0.190404797601199	1	1	1	1	1	1	-1.65860295945703	0	0	0	0	0	0	1.02170250436967
20	Gatifloxacin	1	9000	13	117000	0.178370786516854	1	1	1	1	1	1	-1.72389082495338	0	0	0	0	0	0	1.06191995080689
20	Gatifloxacin	1	9000	14	126000	0.16776750330251	1	1	1	1	1	1	-1.78517616697886	0	0	0	0	0	0	1.09967183535018
20	Gatifloxacin	1	9000	15	135000	0.158354114713217	1	1	1	1	1	1	-1.84292152140792	0	0	0	0	0	0	1.13524308095751
20	Gatifloxacin	1	9000	16	144000	0.149940968122786	1	1	1	1	1	1	-1.89751360819346	0	0	0	0	0	0	1.1688719078383
20	Gatifloxacin	1	9000	17	153000	0.14237668161435	1	1	1	1	1	1	-1.94927904612142	0	0	0	0	0	0	1.20075951377149
20	Gatifloxacin	1	9000	18	162000	0.135538954108858	1	1	1	1	1	1	-1.99849619577983	0	0	0	0	0	0	1.23107736939644
20	Gatifloxacin	1	9000	19	171000	0.129327902240326	1	1	1	1	1	1	-2.04540422189587	0	0	0	0	0	0	1.25997280062942
20	Gatifloxacin	1	9000	20	180000	0.123661148977605	1	1	1	1	1	1	-2.09021012346997	0	0	0	0	0	0	1.28757331923924
20	Gatifloxacin	1	9000	21	189000	0.118470149253731	1	1	1	1	1	1	-2.13309425517216	0	0	0	0	0	0	1.31399002403771
20	Gatifloxacin	1	9000	22	198000	0.113697403760072	1	1	1	1	1	1	-2.17421471261061	0	0	0	0	0	0	1.33932030221317
20	Gatifloxacin	1	9000	23	207000	0.109294320137694	1	1	1	1	1	1	-2.21371085095327	0	0	0	0	0	0	1.36364999680797
20	Gatifloxacin	1	9000	24	216000	0.105219552609776	1	1	1	1	1	1	-2.25170613463894	0	0	0	0	0	0	1.38705516214579
20	Gatifloxacin	1	9000	25	225000	0.101437699680511	1	1	1	1	1	1	-2.28831046520145	0	0	0	0	0	0	1.40960349777564
20	Gatifloxacin	1	9000	26	234000	0.0979182729375482	1	1	1	1	1	1	-2.32362209785785	0	0	0	0	0	0	1.43135552909375
20	Gatifloxacin	1	9000	27	243000	0.0946348733233979	1	1	1	1	1	1	-2.35772923107304	0	0	0	0	0	0	1.45236558651836
20	Gatifloxacin	1	9000	28	252000	0.0915645277577505	1	1	1	1	1	1	-2.39071133385624	0	0	0	0	0	0	1.4726826231068
20	Gatifloxacin	1	9000	29	261000	0.0886871508379888	1	1	1	1	1	1	-2.422640261062	0	0	0	0	0	0	1.49235090158295
20	Gatifloxacin	1	9000	30	270000	0.0859851049424509	1	1	1	1	1	1	-2.45358119607279	0	0	0	0	0	0	1.5114105750315
20	Gatifloxacin	1	9000	31	279000	0.083442838370565	1	1	1	1	1	1	-2.48359345196304	0	0	0	0	0	0	1.52989818041652
20	Gatifloxacin	1	9000	32	288000	0.0810465858328015	1	1	1	1	1	1	-2.51273115589743	0	0	0	0	0	0	1.54784706017198
21	Halofantrine	1	172	1	172	0.533748983464354	0.999480945885591	1	0.916988416988417	1	1	1	-0.62782961895755	-0.000519188869628139	0	-0.0866604382248419	0	0	0	0.332544751934133
21	Halofantrine	1	172	2	344	0.364022924755038	0.99896243032599	1	0.846702317290553	1	1	1	-1.0105384332323	-0.00103810832204639	0	-0.166406101488055	0	0	0	0.518419294371691
21	Halofantrine	1	172	3	516	0.276195819890588	0.99844445248345	1	0.786423841059603	1	1	1	-1.2866451724785	-0.00155675863672146	0	-0.240259393900174	0	0	0	0.642311986737218
21	Halofantrine	1	172	4	688	0.222511018194146	0.997927011521959	1	0.734157650695518	1	1	1	-1.50277865862822	-0.00207514009268502	0	-0.309031490466259	0	0	0	0.73243894219601
21	Halofantrine	1	172	5	860	0.186299555303245	0.99741010660724	1	0.688405797101449	1	1	1	-1.68039938837022	-0.00259325296853571	0	-0.373376793556664	0	0	0	0.80161058806891
21	Halofantrine	1	172	6	1032	0.16022459109773	0.99689373690674	1	0.648021828103683	1	1	1	-1.83117875364547	-0.0031110975424389	0	-0.43383089785201	0	0	0	0.856681550066737
21	Halofantrine	1	172	7	1204	0.140552501963024	0.996377901589632	1	0.612113402061856	1	1	1	-1.96217418055699	-0.00362867409212822	0	-0.490837716148577	0	0	0	0.901721582361594
21	Halofantrine	1	172	8	1376	0.125182783393731	0.995862599826806	1	0.57997557997558	1	1	1	-2.07798034260152	-0.00414598289490668	0	-0.544769279818428	0	0	0	0.939328335264422
21	Halofantrine	1	172	9	1548	0.112843142873517	0.995347830790869	1	0.551044083526682	1	1	1	-2.1817565407591	-0.00466302422764595	0	-0.595940466629052	0	0	0	0.971251012146855
21	Halofantrine	1	172	10	1720	0.102717929991132	0.994833593656134	1	0.524861878453039	1	1	1	-2.27576859119903	-0.00517979836678981	0	-0.644620139665285	0	0	0	0.998717206733167
21	Halofantrine	1	172	11	1892	0.0942601369141653	0.994319887598621	1	0.501054852320675	1	1	1	-2.36169690497153	-0.00569630558835282	0	-0.69103969822038	0	0	0	1.02261733283596
21	Halofantrine	1	172	12	2064	0.0870892122606042	0.993806711796054	1	0.479313824419778	1	1	1	-2.44082225743719	-0.00621254616792259	0	-0.735399730295347	0	0	0	1.04361489804154
21	Halofantrine	1	172	13	2236	0.080932220806445	0.993294065427848	1	0.459381044487427	1	1	1	-2.514143254773	-0.00672852038065993	0	-0.777875251033733	0	0	0	1.06221558705651
21	Halofantrine	1	172	14	2408	0.0755883143306845	0.992781947675116	1	0.441039925719591	1	1	1	-2.58245358008963	-0.00724422850129971	0	-0.818619873121747	0	0	0	1.07881223719406
21	Halofantrine	1	172	15	2580	0.0709064064244301	0.992270357720654	1	0.424107142857143	1	1	1	-2.64639449093052	-0.00775967080415224	0	-0.857769160254499	0	0	0	1.09371507959484
21	Halofantrine	1	172	16	2752	0.0667706602461935	0.991759294748946	1	0.408426483233018	1	1	1	-2.70649151279531	-0.0082748475631039	0	-0.895443348484023	0	0	0	1.10717264051108
21	Halofantrine	1	172	17	2924	0.0630907750969272	0.991248757946152	1	0.393864013266998	1	1	1	-2.76318071509988	-0.00878975905161782	0	-0.93174957325249	0	0	0	1.11938653450825
21	Halofantrine	1	172	18	3096	0.059795317197607	0.990738746500108	1	0.380304243394716	1	1	1	-2.81682792882409	-0.0093044055427354	0	-0.966783706090937	0	0	0	1.13052215385754
21	Halofantrine	1	172	19	3268	0.0568270368553205	0.99022925960032	1	0.367647058823529	1	1	1	-2.86774306553361	-0.00981878730907576	0	-1.00063188030791	0	0	0	1.14071653487863
21	Halofantrine	1	172	20	3440	0.0541395144216228	0.989720296437963	1	0.355805243445693	1	1	1	-2.91619096377557	-0.0103329046228383	0	-1.03337176679971	0	0	0	1.15008424141808
21	Halofantrine	1	172	21	3612	0.0516947150095828	0.989211856205871	1	0.344702467343977	1	1	1	-2.96239972687902	-0.0108467577558027	0	-1.06507364753896	0	0	0	1.15872182956509
21	Halofantrine	1	172	22	3784	0.0494611771207516	0.988703938098536	1	0.334271639690359	1	1	1	-3.00656721772299	-0.0113603469793297	0	-1.09580132406246	0	0	0	1.16671128025123
21	Halofantrine	1	172	23	3956	0.0474126514002263	0.988196541312105	1	0.324453551912568	1	1	1	-3.04886617871672	-0.0118736725643625	0	-1.12561289048662	0	0	0	1.17412266970587
21	Halofantrine	1	172	24	4128	0.0455270642095771	0.987689665044374	1	0.315195753151958	1	1	1	-3.08944831206631	-0.0123867347814266	0	-1.15456139459185	0	0	0	1.1810162694504
21	Halofantrine	1	172	25	4300	0.0437857190509017	0.987183308494784	1	0.306451612903226	1	1	1	-3.12844756383146	-0.0128995339006319	0	-1.18269540587865	0	0	0	1.18744421400777
21	Halofantrine	1	172	26	4472	0.0421726745057722	0.986677470864415	1	0.298179535467671	1	1	1	-3.16598279123399	-0.0134120701916728	0	-1.21005950587541	0	0	0	1.19345183731956
21	Halofantrine	1	172	27	4644	0.0406742547873329	0.986172151355987	1	0.290342298288509	1	1	1	-3.20215994719219	-0.0139243439238293	0	-1.23669471312805	0	0	0	1.19907875262476
21	Halofantrine	1	172	28	4816	0.0392786610544794	0.985667349173849	1	0.2829064919595	1	1	1	-3.23707388328461	-0.0144363553659679	0	-1.2626388530429	0	0	0	1.20435973178044
21	Halofantrine	1	172	29	4988	0.0379756600898764	0.985163063523981	1	0.275842044134727	1	1	1	-3.27080984842948	-0.0149481047865418	0	-1.28792688095303	0	0	0	1.20932542639786
21	Halofantrine	1	172	30	5160	0.0367563329537606	0.984659293613985	1	0.269121813031161	1	1	1	-3.30344474289719	-0.0154595924535926	0	-1.31259116533276	0	0	0	1.21400296318749
21	Halofantrine	1	172	31	5332	0.0356128705529129	0.984156038653085	1	0.262721238938053	1	1	1	-3.33504817407604	-0.0159708186347511	0	-1.33666173691748	0	0	0	1.21841643850735
21	Halofantrine	1	172	32	5504	0.0345384062165623	0.983653297852119	1	0.256618044300378	1	1	1	-3.36568335045034	-0.0164817835972374	0	-1.36016650853886	0	0	0	1.22258733156511
22	Haloperidol	1	4	1	4	0.909090909090909	0.99907063197026	1	0.997937080969572	1	1	1	-0.0953101798043249	-0.000929800159966528	0	-0.00206504977876967	0	0	0	0.0574197175201099
22	Haloperidol	1	4	2	8	0.833333333333333	0.998142989786444	1	0.995882655687082	1	1	1	-0.182321556793955	-0.00185873659462533	0	-0.00412584391355795	0	0	0	0.109730018667918
22	Haloperidol	1	4	3	12	0.769230769230769	0.99721706864564	1	0.993836671802773	1	1	1	-0.262364264467491	-0.00278681090717917	0	-0.00618239990831754	0	0	0	0.157750257202297
22	Haloperidol	1	4	4	16	0.714285714285714	0.996292863762743	1	0.991799077396207	1	1	1	-0.336472236621213	-0.00371402469637137	0	-0.00823473515922912	0	0	0	0.202117327382615
22	Haloperidol	1	4	5	20	0.666666666666667	0.99537037037037	1	0.989769820971867	1	1	1	-0.405465108108164	-0.00464037955650234	0	-0.010282866955584	0	0	0	0.243336114987934
22	Haloperidol	1	4	6	24	0.625	0.994449583718779	1	0.987748851454824	1	1	1	-0.470003629245736	-0.00556587707744523	0	-0.0123268124806586	0	0	0	0.281813632694484
22	Haloperidol	1	4	7	28	0.588235294117647	0.993530499075786	1	0.985736118186449	1	1	1	-0.53062825106217	-0.00649051884466374	0	-0.0143665888125788	0	0	0	0.317882788658651
22	Haloperidol	1	4	8	32	0.555555555555556	0.992613111726685	1	0.983731570920183	1	1	1	-0.587786664902119	-0.00741430643922748	0	-0.0164022129251769	0	0	0	0.351819350964628
22	Haloperidol	1	4	9	36	0.526315789473684	0.99169741697417	1	0.981735159817352	1	1	1	-0.641853886172395	-0.00833724143782829	0	-0.018433701688838	0	0	0	0.383854319248582
22	Haloperidol	1	4	10	40	0.5	0.990783410138249	1	0.979746835443038	1	1	1	-0.693147180559945	-0.00925932541279671	0	-0.0204610718713401	0	0	0	0.414183119276126
22	Haloperidol	1	4	11	44	0.476190476190476	0.98987108655617	1	0.977766548762001	1	1	1	-0.741937344729377	-0.0101805599321175	0	-0.0224843401386836	0	0	0	0.442972551872439
22	Haloperidol	1	4	12	48	0.454545454545455	0.988960441582337	1	0.975794251134644	1	1	1	-0.78845736036427	-0.0111009465594462	0	-0.0245035230559138	0	0	0	0.470366123827271
22	Haloperidol	1	4	13	52	0.434782608695652	0.988051470588235	1	0.973829894313035	1	1	1	-0.832909122935104	-0.0120204868541247	0	-0.0265186370879347	0	0	0	0.496488192827983
22	Haloperidol	1	4	14	56	0.416666666666667	0.987144168962351	1	0.971873430436966	1	1	1	-0.8754687373539	-0.0129391823711974	0	-0.0285296986003142	0	0	0	0.52144722959214
22	Haloperidol	1	4	15	60	0.4	0.986238532110092	1	0.969924812030075	1	1	1	-0.916290731874155	-0.0138570346614262	0	-0.0305367238600816	0	0	0	0.545338413637197
22	Haloperidol	1	4	16	64	0.384615384615385	0.985334555453712	1	0.967983991995998	1	1	1	-0.955511445027436	-0.0147740452713077	0	-0.0325397290365179	0	0	0	0.568245719639244
22	Haloperidol	1	4	17	68	0.37037037037037	0.984432234432234	1	0.966050923614578	1	1	1	-0.993251773010283	-0.0156902157430872	0	-0.0345387302019362	0	0	0	0.59024360982795
22	Haloperidol	1	4	18	72	0.357142857142857	0.983531564501372	1	0.964125560538117	1	1	1	-1.02961941718116	-0.0166055476147754	0	-0.0365337433324558	0	0	0	0.611398418448376
22	Haloperidol	1	4	19	76	0.344827586206897	0.982632541133455	1	0.962207856787668	1	1	1	-1.06471073699243	-0.0175200424201633	0	-0.0385247843087697	0	0	0	0.631769493170041
22	Haloperidol	1	4	20	80	0.333333333333333	0.981735159817352	1	0.96029776674938	1	1	1	-1.09861228866811	-0.018433701688838	0	-0.0405118689169011	0	0	0	0.651410142914796
22	Haloperidol	1	4	21	84	0.32258064516129	0.980839416058394	1	0.958395245170877	1	1	1	-1.1314021114911	-0.0193465269461976	0	-0.0424950128489553	0	0	0	0.670368430211678
22	Haloperidol	1	4	22	88	0.3125	0.979945305378305	1	0.956500247157687	1	1	1	-1.16315080980568	-0.0202585197134669	0	-0.0444742317038632	0	0	0	0.688687837711996
22	Haloperidol	1	4	23	92	0.303030303030303	0.979052823315118	1	0.954612728169709	1	1	1	-1.19392246847243	-0.0211696815077128	0	-0.0464495409881178	0	0	0	0.706407832110805
22	Haloperidol	1	4	24	96	0.294117647058824	0.978161965423112	1	0.952732644017725	1	1	1	-1.22377543162212	-0.0220800138418583	0	-0.0484209561165025	0	0	0	0.723564343860275
22	Haloperidol	1	4	25	100	0.285714285714286	0.977272727272727	1	0.950859950859951	1	1	1	-1.25276296849537	-0.0229895182246988	0	-0.0503884924128131	0	0	0	0.740190177327747
22	Haloperidol	1	4	26	104	0.277777777777778	0.9763851044505	1	0.948994605198627	1	1	1	-1.28093384546206	-0.0238981961609168	0	-0.052352165110573	0	0	0	0.75631536316026
22	Haloperidol	1	4	27	108	0.27027027027027	0.975499092558984	1	0.947136563876652	1	1	1	-1.30833281965018	-0.0248060491510966	0	-0.05431198935374	0	0	0	0.77196746236041
22	Haloperidol	1	4	28	112	0.263157894736842	0.974614687216682	1	0.945285784074255	1	1	1	-1.33500106673234	-0.0257130786917393	0	-0.0562679801974075	0	0	0	0.787171829803226
22	Haloperidol	1	4	29	116	0.256410256410256	0.973731884057971	1	0.943442223305704	1	1	1	-1.3609765531356	-0.0266192862752774	0	-0.0582201526084985	0	0	0	0.801951843517643
22	Haloperidol	1	4	30	120	0.25	0.972850678733032	1	0.941605839416058	1	1	1	-1.38629436111989	-0.0275246733900899	0	-0.060168521466453	0	0	0	0.816329104935006
22	Haloperidol	1	4	31	124	0.24390243902439	0.971971066907776	1	0.939776590577951	1	1	1	-1.41098697371026	-0.0284292415205168	0	-0.0621131015639071	0	0	0	0.830323614407433
22	Haloperidol	1	4	32	128	0.238095238095238	0.971093044263776	1	0.937954435288415	1	1	1	-1.43508452528932	-0.0293329921468738	0	-0.0640539076073695	0	0	0	0.8439539255728
23	Ibutilide	1	22	1	22	0.516483516483516	0.999482620761018	1	0.999648123860401	1	1	1	-0.660711904806792	-0.000517513125802838	0	-0.000351938062534121	0	0	0	0.40677965055371
23	Ibutilide	1	22	2	44	0.348148148148148	0.998965776607747	1	0.999296495267332	1	1	1	-1.05512717672837	-0.0010347585702928	0	-0.000703752308243204	0	0	0	0.64952015796353
23	Ibutilide	1	22	3	66	0.262569832402235	0.99844946671052	1	0.998945113959659	1	1	1	-1.3372382041307	-0.00155173661024086	0	-0.00105544282421717	0	0	0	0.823081119494698
23	Ibutilide	1	22	4	88	0.210762331838565	0.997933690241383	1	0.998593979676615	1	1	1	-1.55702416975006	-0.00206844752198857	0	-0.0014070096974551	0	0	0	0.958249804509431
23	Ibutilide	1	22	5	110	0.176029962546816	0.997418446374091	1	0.998243092157802	1	1	1	-1.73710105669019	-0.00258489158144939	0	-0.00175845301486326	0	0	0	1.06895770056113
23	Ibutilide	1	22	6	132	0.15112540192926	0.996903734284106	1	0.997892451143186	1	1	1	-1.88964531046918	-0.00310106906410988	0	-0.00210977286325714	0	0	0	1.16270552065598
23	Ibutilide	1	22	7	154	0.132394366197183	0.996389553148591	1	0.997542056373097	1	1	1	-2.02197018776536	-0.00361698024502999	0	-0.00246096932936077	0	0	0	1.24399824444013
23	Ibutilide	1	22	8	176	0.117794486215539	0.995875902146405	1	0.997191907588232	1	1	1	-2.1388138151798	-0.00413262539884373	0	-0.0028120424998061	0	0	0	1.31575456664812
23	Ibutilide	1	22	9	198	0.106094808126411	0.995362780458101	1	0.99684200452965	1	1	1	-2.24342216833508	-0.0046480047997612	0	-0.00316299246113482	0	0	0	1.37997401423969
23	Ibutilide	1	22	10	220	0.0965092402464066	0.994850187265918	1	0.996492346938776	1	1	1	-2.33811652137253	-0.00516311872156829	0	-0.00351381929979657	0	0	0	1.43808649634429
23	Ibutilide	1	22	11	242	0.0885122410546139	0.994338121753778	1	0.996142934557394	1	1	1	-2.42461441953188	-0.0056779674376283	0	-0.003864523102151	0	0	0	1.49115002396643
23	Ibutilide	1	22	12	264	0.0817391304347826	0.993826583107286	1	0.995793767127653	1	1	1	-2.50422243908729	-0.00619255122088237	0	-0.00421510395446601	0	0	0	1.53996945046438
23	Ibutilide	1	22	13	286	0.0759289176090469	0.993315570513719	1	0.995444844392062	1	1	1	-2.57795767097454	-0.00670687034385042	0	-0.00456556194291942	0	0	0	1.58517130569023
23	Ibutilide	1	22	14	308	0.0708898944193062	0.992805083162026	1	0.995096166093491	1	1	1	-2.6466273884758	-0.00722092507863227	0	-0.00491589715359861	0	0	0	1.62725287143171
23	Ibutilide	1	22	15	330	0.0664780763790665	0.992295120242821	1	0.994747731975171	1	1	1	-2.71088306418651	-0.0077347156969084	0	-0.00526610967249974	0	0	0	1.66661545596413
23	Ibutilide	1	22	16	352	0.0625832223701731	0.99178568094838	1	0.994399541780691	1	1	1	-2.77125805005408	-0.00824824246994054	0	-0.00561619958552955	0	0	0	1.70358760502422
23	Ibutilide	1	22	17	374	0.0591194968553459	0.991276764472641	1	0.994051595254	1	1	1	-2.82819451294427	-0.00876150566857272	0	-0.00596616697850375	0	0	0	1.73844169416907
23	Ibutilide	1	22	18	396	0.0560190703218117	0.99076837001119	1	0.993703892139405	1	1	1	-2.88206310475715	-0.00927450556323219	0	-0.00631601193714863	0	0	0	1.77140604560411
23	Ibutilide	1	22	19	418	0.0532276330690827	0.990260496761266	1	0.99335643218157	1	1	1	-2.9331775988939	-0.0097872424239307	0	-0.00666573454710033	0	0	0	1.80267394427384
23	Ibutilide	1	22	20	440	0.0507011866235167	0.989753143921751	1	0.993009215125516	1	1	1	-2.9818059638558	-0.0102997165202639	0	-0.00701533489390493	0	0	0	1.83241045921936
23	Ibutilide	1	22	21	462	0.0484037075180227	0.989246310693171	1	0.992662240716623	1	1	1	-3.02817886658127	-0.010811928121414	0	-0.00736481306301934	0	0	0	1.86075768164983
23	Ibutilide	1	22	22	484	0.0463054187192118	0.988739996277685	1	0.992315508700622	1	1	1	-3.07249628976583	-0.0113238774961492	0	-0.00771416913981018	0	0	0	1.88783880122383
23	Ibutilide	1	22	23	506	0.04438149197356	0.988234199879087	1	0.991969018823604	1	1	1	-3.11493274389135	-0.0118355649128259	0	-0.00806340320955561	0	0	0	1.91376131666906
23	Ibutilide	1	22	24	528	0.042611060743427	0.987728920702798	1	0.991622770832011	1	1	1	-3.15564141754344	-0.0123469906393879	0	-0.00841251535744336	0	0	0	1.93861959238557
23	Ibutilide	1	22	25	550	0.040976460331299	0.987224157955865	1	0.991276764472641	1	1	1	-3.19475751541931	-0.0128581549433687	0	-0.00876150566857272	0	0	0	1.9624969146648
23	Ibutilide	1	22	26	572	0.0394626364399664	0.986719910846954	1	0.990930999492643	1	1	1	-3.23240096764524	-0.0133690580918914	0	-0.00911037422795392	0	0	0	1.98546716063417
23	Ibutilide	1	22	27	594	0.0380566801619433	0.986216178586346	1	0.990585475639522	1	1	1	-3.26867864735202	-0.0138797003516703	0	-0.00945912112050773	0	0	0	2.0075961642877
23	Ibutilide	1	22	28	616	0.0367474589523065	0.985712960385936	1	0.990240192661132	1	1	1	-3.30368619986878	-0.0143900819890108	0	-0.00980774643106679	0	0	0	2.02894284327276
23	Ibutilide	1	22	29	638	0.035525321239607	0.985210255459224	1	0.98989515030568	1	1	1	-3.3375095624049	-0.0149002032698112	0	-0.0101562502443743	0	0	0	2.04956013501696
23	Ibutilide	1	22	30	660	0.0343818580833943	0.984708063021316	1	0.989550348321723	1	1	1	-3.37022623501389	-0.0154100644595627	0	-0.0105046326450854	0	0	0	2.06949577964433
23	Ibutilide	1	22	31	682	0.033309709425939	0.984206382288917	1	0.989205786458168	1	1	1	-3.40190635014276	-0.015919665823351	0	-0.0108528937177669	0	0	0	2.08879297881961
23	Ibutilide	1	22	32	704	0.0323024054982818	0.983705212480326	1	0.988861464464274	1	1	1	-3.43261357789553	-0.0164290076258566	0	-0.0112010335468967	0	0	0	2.10749095339234
24	Levofloxacin	1	30932	1	30932	0.932892487395104	1	1	1	1	1	1	-0.069465318006052	0	0	0	0	0	0	0.0427907649440427
24	Levofloxacin	1	30932	2	61864	0.874225395637819	1	1	1	1	1	1	-0.134417046828658	0	0	0	0	0	0	0.0828011505657596
24	Levofloxacin	1	30932	3	92796	0.822500554709676	1	1	1	1	1	1	-0.195406121923778	0	0	0	0	0	0	0.120370534129547
24	Levofloxacin	1	30932	4	123728	0.776554553860379	1	1	1	1	1	1	-0.252888382762876	0	0	0	0	0	0	0.155779713596683
24	Levofloxacin	1	30932	5	154660	0.735470187801457	1	1	1	1	1	1	-0.30724527300285	0	0	0	0	0	0	0.189263658968461
24	Levofloxacin	1	30932	6	185592	0.698514600579605	1	1	1	1	1	1	-0.358799197741082	0	0	0	0	0	0	0.221020972383832
24	Levofloxacin	1	30932	7	216524	0.66509518594824	1	1	1	1	1	1	-0.407825111805101	0	0	0	0	0	0	0.251221026527361
24	Levofloxacin	1	30932	8	247456	0.634727569022933	1	1	1	1	1	1	-0.454559397307806	0	0	0	0	0	0	0.280009433219745
24	Levofloxacin	1	30932	9	278388	0.607011976487462	1	1	1	1	1	1	-0.499206757495437	0	0	0	0	0	0	0.307512290040965
24	Levofloxacin	1	30932	10	309320	0.581615538603041	1	1	1	1	1	1	-0.541945636126872	0	0	0	0	0	0	0.333839518678
24	Levofloxacin	1	30932	11	340252	0.558258855543381	1	1	1	1	1	1	-0.582932525345357	0	0	0	0	0	0	0.359087518581821
24	Levofloxacin	1	30932	12	371184	0.536705675600112	1	1	1	1	1	1	-0.622305424859718	0	0	0	0	0	0	0.38334129782944
24	Levofloxacin	1	30932	13	402116	0.516754875522163	1	1	1	1	1	1	-0.66018664549203	0	0	0	0	0	0	0.406676200114483
24	Levofloxacin	1	30932	14	433048	0.498234165423012	1	1	1	1	1	1	-0.696685100779564	0	0	0	0	0	0	0.429159316378248
24	Levofloxacin	1	30932	15	463980	0.480995100561534	1	1	1	1	1	1	-0.73189819487101	0	0	0	0	0	0	0.450850647757287
24	Levofloxacin	1	30932	16	494912	0.464909094054353	1	1	1	1	1	1	-0.765913389164048	0	0	0	0	0	0	0.471804070635053
24	Levofloxacin	1	30932	17	525844	0.449864203782207	1	1	1	1	1	1	-0.798809511132184	0	0	0	0	0	0	0.492068142881673
24	Levofloxacin	1	30932	18	556776	0.435762523612248	1	1	1	1	1	1	-0.830657854634135	0	0	0	0	0	0	0.511686781646565
24	Levofloxacin	1	30932	19	587708	0.422518050364152	1	1	1	1	1	1	-0.861523110342111	0	0	0	0	0	0	0.530699836503994
24	Levofloxacin	1	30932	20	618640	0.410054928288068	1	1	1	1	1	1	-0.891464156822842	0	0	0	0	0	0	0.549143576760448
24	Levofloxacin	1	30932	21	649572	0.398305995338894	1	1	1	1	1	1	-0.920534736588231	0	0	0	0	0	0	0.567051107903103
24	Levofloxacin	1	30932	22	680504	0.387211572403161	1	1	1	1	1	1	-0.948784036621477	0	0	0	0	0	0	0.584452729204988
24	Levofloxacin	1	30932	23	711436	0.376718449391819	1	1	1	1	1	1	-0.97625718913139	0	0	0	0	0	0	0.601376242190577
24	Levofloxacin	1	30932	24	742368	0.366779031839832	1	1	1	1	1	1	-1.00299570533787	0	0	0	0	0	0	0.617847217848449
24	Levofloxacin	1	30932	25	773300	0.357350619130724	1	1	1	1	1	1	-1.02903785275651	0	0	0	0	0	0	0.633889229039299
24	Levofloxacin	1	30932	26	804232	0.348394791254805	1	1	1	1	1	1	-1.0544189845897	0	0	0	0	0	0	0.649524053401484
24	Levofloxacin	1	30932	27	835164	0.339876885526303	1	1	1	1	1	1	-1.0791718283397	0	0	0	0	0	0	0.664771851137187
24	Levofloxacin	1	30932	28	866096	0.331765548230995	1	1	1	1	1	1	-1.10332673955534	0	0	0	0	0	0	0.679651321320893
24	Levofloxacin	1	30932	29	897028	0.324032348978318	1	1	1	1	1	1	-1.12691192564807	0	0	0	0	0	0	0.694179839770454
24	Levofloxacin	1	30932	30	927960	0.316651447759875	1	1	1	1	1	1	-1.14995364391622	0	0	0	0	0	0	0.708373581030424
24	Levofloxacin	1	30932	31	958892	0.309599306497553	1	1	1	1	1	1	-1.17247637726406	0	0	0	0	0	0	0.72224762661531
24	Levofloxacin	1	30932	32	989824	0.302854438296578	1	1	1	1	1	1	-1.19450299056408	0	0	0	0	0	0	0.735816061329052
25	Methadone	1	507	1	507	0.932463034501132	0.984306806574427	1	0.986625161579655	1	1	1	-0.0699257695355521	-0.0158176352287224	0	-0.0134650871835037	0	0	0	0.034653024297016
25	Methadone	1	507	2	1014	0.873471425006239	0.969098555494606	1	0.97360337376998	1	1	1	-0.135279863158639	-0.0313889638065595	0	-0.0267512720621739	0	0	0	0.0666017774136799
25	Methadone	1	507	3	1521	0.821499823964323	0.954353110650941	1	0.960920839649546	1	1	1	-0.196623555790506	-0.0467215390669616	0	-0.0398632462979696	0	0	0	0.0961890714693725
25	Methadone	1	507	4	2028	0.77536552946389	0.940049663001064	1	0.948564471948869	1	1	1	-0.254420709899976	-0.0618225721338447	0	-0.0528055193827063	0	0	0	0.123697826265271
25	Methadone	1	507	5	2535	0.734137388568432	0.926168632590651	1	0.936521848003005	1	1	1	-0.309059089997069	-0.0766989522865085	0	-0.065582427948866	0	0	0	0.149364193228812
25	Methadone	1	507	6	3042	0.697072296355308	0.912691579128638	1	0.924781168092577	1	1	1	-0.360866148557201	-0.0913572658318367	0	-0.0781981444930516	0	0	0	0.173387274116478
25	Methadone	1	507	7	3549	0.6635700066357	0.899601120257999	1	0.913331216879533	1	1	1	-0.410120919644359	-0.105803813613182	0	-0.0906566855559986	0	0	0	0.195936442391798
25	Methadone	1	507	8	4056	0.633140376266281	0.886880856760375	1	0.902161327672713	1	1	1	-0.457063117970001	-0.12004462727244	0	-0.102961919399268	0	0	0	0.21715694346135
25	Methadone	1	507	9	4563	0.605379226844245	0.87451530401782	1	0.891261349283893	1	1	1	-0.501900196091511	-0.134085484370354	0	-0.115117573215335	0	0	0	0.237174237412762
25	Methadone	1	507	10	5070	0.579950289975145	0.862489829129373	1	0.880621615257829	1	1	1	-0.544812886054127	-0.147931922459922	0	-0.127127239904693	0	0	0	0.256097408437878
25	Methadone	1	507	11	5577	0.556571519440248	0.850790593145517	1	0.870232915280266	1	1	1	-0.585959600009705	-0.161589252198705	0	-0.138994384450818	0	0	0	0.274021871635042
25	Methadone	1	507	12	6084	0.535004585753592	0.839404497941083	1	0.860086468586147	1	1	1	-0.625479960620824	-0.175062569577724	0	-0.150722349921268	0	0	0	0.291031543991352
25	Methadone	1	507	13	6591	0.515046722095504	0.828319137297804	1	0.850173899206656	1	1	1	-0.663497659917897	-0.188356767337438	0	-0.162314363120955	0	0	0	0.307200601908268
25	Methadone	1	507	14	7098	0.496524329692155	0.817522751812433	1	0.840487212908445	1	1	1	-0.700122794296371	-0.201476545634782	0	-0.17377353992148	0	0	0	0.322594916231134
25	Methadone	1	507	15	7605	0.479287915097569	0.807004187285877	1	0.83101877569159	1	1	1	-0.735453786784391	-0.214426422019482	0	-0.185102890288562	0	0	0	0.337273233225361
25	Methadone	1	507	16	8112	0.463208046585495	0.796752856283824	1	0.821761293724732	1	1	1	-0.769578981143895	-0.227210740772605	0	-0.19630532302786	0	0	0	0.351288153577507
25	Methadone	1	507	17	8619	0.448172098085665	0.786758702590366	1	0.812707794606575	1	1	1	-0.802577972820272	-0.239833681655689	0	-0.207383650267894	0	0	0	0.364686949459026
25	Methadone	1	507	18	9126	0.43408160734218	0.777012168303768	1	0.803851609852555	1	1	1	-0.834522727207517	-0.252299268114506	0	-0.218340591697366	0	0	0	0.377512250729556
25	Methadone	1	507	19	9633	0.420850117236818	0.767504163348056	1	0.795186358514235	1	1	1	-0.865478524753085	-0.26461137497777	0	-0.22917877857284	0	0	0	0.389802624616767
25	Methadone	1	507	20	10140	0.408401400233372	0.758226037195994	1	0.786705931846866	1	1	1	-0.89550476411432	-0.276773735687643	0	-0.239900757511562	0	0	0	0.401593068090101
25	Methadone	1	507	21	10647	0.396667988893296	0.74916955261856	1	0.778404478947697	1	1	1	-0.924655648205783	-0.288789949095794	0	-0.250508994083092	0	0	0	0.412915428220903
25	Methadone	1	507	22	11154	0.38558995262752	0.740326861293477	1	0.770276393294064	1	1	1	-0.952980773049122	-0.300663485855972	0	-0.261005876212429	0	0	0	0.423798762786647
25	Methadone	1	507	23	11661	0.375113873854563	0.731690481121005	1	0.762316300116182	1	1	1	-0.980525635496021	-0.312397694441493	0	-0.271393717406362	0	0	0	0.434269651011378
25	Methadone	1	507	24	12168	0.365191986644407	0.72325327510917	1	0.754519044544868	1	1	1	-1.00733207287773	-0.323995806813753	0	-0.281674759813972	0	0	0	0.444352462476527
25	Methadone	1	507	25	12675	0.355781448538755	0.715008431703204	1	0.746879680479281	1	1	1	-1.03343864524815	-0.335460943765768	0	-0.291851177131396	0	0	0	0.454069590766671
25	Methadone	1	507	26	13182	0.346843722128629	0.706949446445245	1	0.739393460124155	1	1	1	-1.05888096898702	-0.346796119962849	0	-0.301925077360276	0	0	0	0.463441657244481
25	Methadone	1	507	27	13689	0.338344047561506	0.699070104860516	1	0.732055824150013	1	1	1	-1.08369200900629	-0.358004248700781	0	-0.311898505428645	0	0	0	0.472487689411268
25	Methadone	1	507	28	14196	0.330250990752972	0.691364466475346	1	0.724862392433522	1	1	1	-1.1079023355752	-0.369088146400287	0	-0.321773445682404	0	0	0	0.481225277553459
25	Methadone	1	507	29	14703	0.322536054923282	0.683826849880653	1	0.717808955338464	1	1	1	-1.13154035078354	-0.380050536855136	0	-0.331551824254976	0	0	0	0.48967071276235
25	Methadone	1	507	30	15210	0.315173345339937	0.676451818761965	1	0.710891465500855	1	1	1	-1.15463248885102	-0.390894055249908	0	-0.34123551132223	0	0	0	0.497839108914788
25	Methadone	1	507	31	15717	0.308139278954087	0.669234168823789	1	0.70410603008453	1	1	1	-1.17720339382577	-0.401621251962262	0	-0.350826323249254	0	0	0	0.505744510793089
25	Methadone	1	507	32	16224	0.301412332070272	0.662168915542229	1	0.697448903476055	1	1	1	-1.19927607766702	-0.412234596163411	0	-0.36032602463517	0	0	0	0.51339999018544
26	Moxifloxacin	1	6228	1	6228	0.939089570996152	0.983663319588278	0.983971793650998	0.984597045046471	0.962189695052727	1	0.997632144437668	-0.0628444145509297	-0.0164715953681849	-0.0161580473295556	-0.0155228128341115	-0.0385436595509714	0	-0.00237066336550418	0.0421572301257718
26	Moxifloxacin	1	6228	2	12456	0.885173286379999	0.967851833498513	0.96844928861454	0.969661394270349	0.927134458451549	1	0.995275475866087	-0.121971849322065	-0.0326762679887879	-0.0320591582550139	-0.0308083464984469	-0.0756566770612628	0	-0.00473571997532635	0.0816125506750689
26	Moxifloxacin	1	6228	3	18684	0.837111883143207	0.95254061633188	0.953408923722199	0.955172099406421	0.894543751023011	1	0.992929915192282	-0.177797545809181	-0.0486225310721704	-0.047711376361992	-0.045863745934527	-0.111441466080216	0	-0.00709519628750585	0.118659603171722
26	Moxifloxacin	1	6228	4	24912	0.794000785562194	0.937706295384985	0.938828579075701	0.941109445844424	0.8641664985469	1	0.990595384067119	-0.230670828362451	-0.0643184969340213	-0.0631223733342999	-0.0606958381425566	-0.145989822092118	0	-0.00944911857324065	0.153547137555974
26	Moxifloxacin	1	6228	5	31140	0.75511263324696	0.923326931599941	0.924687467501215	0.927454863133372	0.835784611003591	1	0.988271804876579	-0.28088835775125	-0.0797719017781604	-0.0782994715333038	-0.0753111507700435	-0.179384341433127	0	-0.0117975129186438	0.18648776989625
26	Moxifloxacin	1	6228	6	37368	0.719855909617396	0.909381911302526	0.91096603566791	0.914190843165441	0.809207738298861	1	0.985959100733157	-0.328704212531217	-0.0949901285933996	-0.0932496648892954	-0.0897159293614758	-0.211699610834047	0	-0.0141404052264764	0.21766468862428
26	Moxifloxacin	1	6228	7	43596	0.687744643362353	0.895851847604851	0.897645873881573	0.901300865281432	0.784268995719623	1	0.98365719546738	-0.374337667848492	-0.109980228334103	-0.10797963825407	-0.103916153383141	-0.243003210694169	0	-0.0164778212178638	0.247236863415168
26	Moxifloxacin	1	6228	8	49824	0.658375872933158	0.882718490480764	0.884709633678189	0.888769327624159	0.760821456174123	1	0.981366013619445	-0.417979275288962	-0.124748939536554	-0.12249578534875	-0.117917551126005	-0.273356566027017	0	-0.0188097864339874	0.275343143031931
26	Moxifloxacin	1	6228	9	56052	0.631412648572227	0.869964644636842	0.872140952441781	0.876581484140021	0.738735253401448	1	0.979085480430977	-0.459795670476971	-0.139302706507725	-0.136804225427468	-0.1317256135796	-0.302815672015787	0	-0.0211363262377619	0.30210551648018
26	Moxifloxacin	1	6228	10	62280	0.606571046838134	0.857574094401756	0.859924384357773	0.86472338669389	0.717895175500183	1	0.97681552183689	-0.499933415103948	-0.153647696209347	-0.150910818765608	-0.145345607361032	-0.331431715717331	0	-0.0234574658154884	0.327631735571076
26	Moxifloxacin	1	6228	11	68508	0.583610134414402	0.845531534944127	0.848045337089244	0.853181831819604	0.69819865460777	1	0.974556064457376	-0.538522097140892	-0.167789813947989	-0.164821181070722	-0.15878258677528	-0.359251611256956	0	-0.0257732301784917	0.352017444111181
26	Moxifloxacin	1	6228	12	74736	0.562324128217667	0.833822509205401	0.836490013630208	0.841944311678644	0.679554078679387	1	0.972307035589995	-0.575676854738557	-0.181734717971063	-0.178540696904813	-0.172041405075913	-0.38631846256894	0	-0.0280836441647361	0.375347921649084
26	Moxifloxacin	1	6228	13	80964	0.542536210798121	0.822433350001316	0.825245358848783	0.830998968844062	0.661879366723324	1	0.970068363201876	-0.611500447780103	-0.195487833059047	-0.192074532198265	-0.185126724988997	-0.41267196514368	0	-0.0303887324404254	0.397699523011284
26	Moxifloxacin	1	6228	14	87192	0.524093607150167	0.811351126804445	0.814299010284775	0.820334554566023	0.645100760742589	1	0.96783997592203	-0.646084971015693	-0.209054363195627	-0.205427645928217	-0.198043028557305	-0.438348756181594	0	-0.0326885195015813	0.419140875477407
26	Moxifloxacin	1	6228	15	93420	0.506863632644551	0.800563596772128	0.803639252811835	0.80994039021016	0.629151796879032	1	0.96562180303376	-0.679513280712539	-0.222439303389844	-0.218604801027432	-0.210794626356837	-0.463382720905909	0	-0.0349830296756072	0.439733881191505
26	Moxifloxacin	1	6228	16	99648	0.490730495710858	0.790059159629873	0.793254976814631	0.799806331590853	0.613972425494989	1	0.963413774467185	-0.711860190454685	-0.235647450717423	-0.231610574583731	-0.22338566613307	-0.487805261460743	0	-0.0372722871228299	0.459534561800137
26	Moxifloxacin	1	6228	17	105876	0.47559269229531	0.779826816060689	0.783135639567156	0.789922735949015	0.599508255631419	1	0.96121582079186	-0.743193479516295	-0.248683414642387	-0.244449367384629	-0.23582014090024	-0.51164553374797	0	-0.0395563158380286	0.478593774328828
26	Moxifloxacin	1	6228	18	112104	0.461360868134218	0.769856129286559	0.773271229529914	0.780280431348415	0.585709903803868	1	0.959027873209498	-0.773574747991694	-0.261551626674516	-0.257125412856995	-0.248101896543215	-0.534930656683506	0	-0.0418351396519415	0.496957821244442
26	Moxifloxacin	1	6228	19	118332	0.447956053696598	0.760137189559972	0.763652233311829	0.77087068828639	0.572532430704318	1	0.956849863546792	-0.803060145805962	-0.274256349413285	-0.269642785447169	-0.260234638958196	-0.557685897639693	0	-0.0441087822327602	0.514668972998567
26	Moxifloxacin	1	6228	20	124560	0.435308198140815	0.750660581311554	0.754269605067696	0.761685193334226	0.559934852269395	1	0.954681724248334	-0.831700997288997	-0.286801685024474	-0.282005408483033	-0.272221940765386	-0.579934837253633	0	-0.0463772670876019	0.531765917745885
26	Moxifloxacin	1	6228	21	130788	0.423354944810269	0.741417352724857	0.745114738124239	0.752716024639912	0.547879713907431	1	0.952523388369631	-0.859544338767734	-0.299191583191608	-0.294217061556021	-0.28406724762408	-0.60169951629673	0	-0.0486406175639701	0.548284150121103
26	Moxifloxacin	1	6228	22	137016	0.412040603081492	0.73239898753164	0.736179438647702	0.743955629141548	0.536332718566522	1	0.950374789570216	-0.886633383319789	-0.311429848580826	-0.306281387457799	-0.295773884178084	-0.623000566898691	0	-0.0508988568511947	0.564256308747599
26	Moxifloxacin	1	6228	23	143244	0.40131528078758	0.723597378840855	0.727455901183642	0.735396801353643	0.52526240086434	1	0.948235862106847	-0.91300792421947	-0.323520147854436	-0.318201898703471	-0.307345059657138	-0.64385733008434	0	-0.0531520079818586	0.579712470399851
26	Moxifloxacin	1	6228	24	149472	0.39113414870108	0.715004804832288	0.718936685915432	0.727032663601068	0.514639840759057	1	0.946106540826805	-0.938704686532024	-0.33546601626555	-0.329981983670554	-0.318783873157952	-0.664287961301449	0	-0.0554000938332067	0.594680407344862
26	Moxifloxacin	1	6228	25	155700	0.381456814204644	0.706613906161673	0.710614697502216	0.718856647586717	0.504438411274742	1	0.943986761161276	-0.963757634653055	-0.347270863863438	-0.341624912380543	-0.330093318626604	-0.684309525382529	0	-0.0576431371285394	0.609185813266457
26	Moxifloxacin	1	6228	26	161928	0.372246785695594	0.698417664938316	0.702483165369811	0.710862477189048	0.494633555647796	1	0.941876459118829	-0.988198242255583	-0.358937981336876	-0.353133841947765	-0.341276289562319	-0.703938082185211	0	-0.0598811604385919	0.623252502270577
26	Moxifloxacin	1	6228	27	168156	0.363471012750945	0.690409385149018	0.694535625339468	0.703044152394811	0.485202589967702	1	0.939775571278969	-1.01205573002757	-0.370470545520525	-0.364511821718229	-0.352335583461147	-0.723188763988109	0	-0.0621141861828952	0.636902584733907
26	Moxifloxacin	1	6228	28	174384	0.355099489838372	0.682582674413525	0.686765902489757	0.695395934280534	0.476124527973131	1	0.937684034785791	-1.03535727570444	-0.381871624587403	-0.375761798119401	-0.363273906016589	-0.742075845576602	0	-0.0643422366311255	0.650156623157199
26	Moxifloxacin	1	6228	29	180612	0.347104913558602	0.67493142696702	0.679168095156044	0.687912330963744	0.467379925155042	1	0.935601787341707	-1.05812820018289	-0.393144182948677	-0.386886619240198	-0.374093875092957	-0.76061280783176	0	-0.0665653339044347	0.663033770691212
26	Moxifloxacin	1	6228	30	186840	0.339462385168661	0.667449807774455	0.671736559980463	0.680588084451663	0.458950739729359	1	0.933528767201264	-1.08039213291198	-0.404291085880354	-0.397889039159018	-0.384798024486069	-0.778812395531955	0	-0.0687834999767705	0.675551894596142
26	Moxifloxacin	1	6228	31	193068	0.332149151557395	0.660132237689854	0.66446589793276	0.673418158321182	0.45082020838726	1	0.931464913165035	-1.10217115927007	-0.415315103894935	-0.408771722036251	-0.395388807484795	-0.796686669987934	0	-0.0709967566761778	0.687727686557926
26	Moxifloxacin	1	6228	32	199296	0.325144378996771	0.652973379581261	0.657350941229263	0.666397726169473	0.44297273502243	1	0.929410164573605	-1.12348595223215	-0.426218916874714	-0.419537245986494	-0.40586860024596	-0.814247057055812	0	-0.0732051256860884	0.69957676150391
27	Ondansetron	1	178.6	1	178.6	0.865673886883273	0.996718636893104	0.990774602781049	0.992142404617767	0.988233433913536	1	0.999825510723079	-0.144247015379301	-0.00328675858506423	-0.00926821473841049	-0.00788862895791213	-0.0118363399981724	0	-0.000174504501945628	0.0870521255947874
27	Ondansetron	1	178.6	2	357.2	0.763161384431773	0.99345873804187	0.981717865514735	0.98440733012633	0.976740551663064	1	0.999651082328551	-0.270285757046664	-0.00656274976832066	-0.0184513179010862	-0.01571551420453	-0.023534218333504	0	-0.000348978557383322	0.162885004200003
27	Ondansetron	1	178.6	3	535.8	0.6823571259189	0.990220093527885	0.972825204901404	0.976791933052653	0.965511914417024	1	0.999476714784556	-0.382202113150522	-0.00982804386736249	-0.0275508584621705	-0.0234816147653487	-0.0350968370374295	0	-0.000523422176934809	0.230015999766484
27	Ondansetron	1	178.6	4	714.4	0.617025838962153	0.987002496161152	0.964092202217598	0.969293457236927	0.954538512447182	1	0.999302408059257	-0.48284437757088	-0.0130827105131994	-0.0365683434913862	-0.0311878674940514	-0.0465272883357195	0	-0.000697835371217495	0.290200091399292
27	Ondansetron	1	178.6	5	893	0.563111545988258	0.983805741435903	0.955514595994819	0.96190923050674	0.943811741018058	1	0.999128162120841	-0.574277542601712	-0.0163268186591679	-0.0455052396520576	-0.0388351877507411	-0.0578285596124725	0	-0.000872218150842571	0.344709719887035
27	Ondansetron	1	178.6	6	1071.6	0.517861963466211	0.980629627487274	0.947088275085668	0.954636661502121	0.933323377883969	1	0.998953976937515	-0.658046552029664	-0.0195604365896967	-0.0543629746327852	-0.0464244700544383	-0.0690035380967296	0	-0.00104657052641554	0.394496953391277
27	Ondansetron	1	178.6	7	1250.2	0.479343661502582	0.977473955048811	0.938809272093661	0.947473236643531	0.923065562270003	1	0.998779852477509	-0.735337482655805	-0.0227836319289305	-0.063142938516269	-0.0539565887110008	-0.0800550152901051	0	-0.00122089250853667	0.440292776784586
27	Ondansetron	1	178.6	8	1428.8	0.44615861694705	0.974338527410792	0.930673757144659	0.94041651723534	0.913030775223997	1	0.998605788709074	-0.807080746809153	-0.0259964716492155	-0.0718464850885611	-0.0614323984175766	-0.0909856911524196	0	-0.00139518410780095	0.482670665735027
27	Ondansetron	1	178.6	9	1607.4	0.417270881670534	0.971223150379359	0.922678031979373	0.933464136697794	0.903211821236316	1	0.998431785600486	-0.874019671747491	-0.0291990220794497	-0.0804749330918318	-0.0688527348446267	-0.101798178061036	0	-0.00156944533479697	0.522088832817618
27	Ondansetron	1	178.6	10	1786	0.391896493020089	0.968127632236419	0.914818524347785	0.926613797920861	0.893601811033004	1	0.998257843120041	-0.936757522476737	-0.0323913489132986	-0.0890295674235506	-0.0762184151965129	-0.112495004558426	0	-0.00174367620010858	0.558919194665255
27	Ondansetron	1	178.6	11	1964.6	0.369431249197586	0.96505178370032	0.907091782687651	0.919863270733737	0.884194145455832	1	0.998083961236057	-0.995790620323911	-0.035573517217281	-0.0975116402848068	-0.0835302387515916	-0.123078618901407	0	-0.0019178767143139	0.593467774016348
27	Ondansetron	1	178.6	12	2143.2	0.349401979236233	0.961995417887263	0.899494471070427	0.91321038948417	0.874982500349993	1	0.997910139916874	-1.05153221662669	-0.0387455914387274	-0.105922372280338	-0.0907889873827054	-0.133551392424525	0	-0.00209204688798524	0.625989406839671
27	Ondansetron	1	178.6	13	2321.8	0.331432849573831	0.958958350273458	0.892023364399055	0.906653050722074	0.865960812386704	1	0.997736379130855	-1.1043300552635	-0.0419076354136102	-0.114262953472682	-0.0979954260589167	-0.143915622729134	0	-0.00226618673168958	0.656698561719758
27	Ondansetron	1	178.6	14	2500.4	0.315221558854138	0.955940398657983	0.88467534384311	0.900189210982221	0.857123265753926	1	0.997562678846384	-1.15447952595753	-0.0450597123742527	-0.122534544392734	-0.105150303329297	-0.154173536708895	0	-0.00244029625598877	0.685777443100986
27	Ondansetron	1	178.6	15	2679	0.300522193211488	0.95294138312635	0.877447392497713	0.893816884661118	0.848464279653827	1	0.997389039031868	-1.20223367345281	-0.0482018849569163	-0.130738277008842	-0.112254351789525	-0.164327293421676	0	-0.00261437547143828	0.713382157696476
27	Ondansetron	1	178.6	16	2857.6	0.287132664770743	0.949961126014751	0.870336591253528	0.887534141983423	0.839978496550488	1	0.997215459655737	-1.2478109234376	-0.0513342152092685	-0.138875255656483	-0.119308288532035	-0.174378986817103	0	-0.00278842438858875	0.739647474365674
27	Ondansetron	1	178.6	17	3036.2	0.274885364921666	0.946999451874972	0.86334011486596	0.881339107053527	0.831660771115867	1	0.997041940686439	-1.291401123054	-0.0544567645977347	-0.146946557930418	-0.126312815580393	-0.184330648328391	0	-0.00296244301798529	0.764690545733365
27	Ondansetron	1	178.6	18	3214.8	0.26364011177791	0.944056187439963	0.856455228212433	0.87522995598817	0.823506159826075	1	0.996868482092448	-1.33317031881838	-0.0575695940147351	-0.154953235541121	-0.133268620308569	-0.194184249336467	0	-0.00313643137016706	0.788613852013542
27	Ondansetron	1	178.6	19	3393.4	0.253278760672476	0.941131161590052	0.849679282727337	0.869204915126193	0.815509911163787	1	0.996695083842258	-1.37326457597387	-0.0606727637858107	-0.162896315137205	-0.140176375845725	-0.203941703513883	0	-0.00331038945566808	0.81150755431815
27	Ondansetron	1	178.6	20	3572	0.24370103747618	0.938224205319774	0.843009713004878	0.863262259311718	0.807667456385957	1	0.996521745904385	-1.41181306117423	-0.0637663336766366	-0.170776799095439	-0.147036741467125	-0.213604869055465	0	-0.00348431728501674	0.833451394143511
27	Ondansetron	1	178.6	21	3750.6	0.234821282846418	0.935335151705327	0.836444033560676	0.857400310247285	0.799974400819174	1	0.996348468247368	-1.44893055268956	-0.0668503628999292	-0.178595666279871	-0.153850362971714	-0.223175550802221	0	-0.00365821486873637	0.854516240178042
27	Ondansetron	1	178.6	22	3929.2	0.226565883232944	0.932463835872614	0.829979835743525	0.851617434913634	0.792426515647782	1	0.996175250839767	-1.4847195011544	-0.0699249101222477	-0.186353872771514	-0.160617873046934	-0.232655502264565	0	-0.00383208221734385	0.874765358214267
27	Ondansetron	1	178.6	23	4107.8	0.21887122537461	0.929610094965883	0.823614784789255	0.845912044052996	0.785019730162551	1	0.996002093650163	-1.51927173410057	-0.0729900334706885	-0.19405235256994	-0.167339891621271	-0.242046427550548	0	-0.00400591934135143	0.894255461604258
27	Ondansetron	1	178.6	24	4286.4	0.211682053922831	0.926773768116932	0.817346617009127	0.84028259071296	0.77775012444002	1	0.995828996647161	-1.55266987570135	-0.0760457905394796	-0.201692018268065	-0.174017026205033	-0.251349983204378	0	-0.00417972625126575	0.913037586259265
27	Ondansetron	1	178.6	25	4465	0.204950142450142	0.923954696414885	0.811173137105642	0.83472756884809	0.770613922424865	1	0.995655959799386	-1.58498853698376	-0.0790922383964755	-0.209273761701371	-0.180649872219825	-0.260567779960209	0	-0.00435350295758746	0.931157824233272
27	Ondansetron	1	178.6	26	4643.6	0.198633210230214	0.921152722876509	0.805092215609076	0.829245511976642	0.763607485389644	1	0.995482983075486	-1.61629531964806	-0.08212943358955	-0.216798454572683	-0.187239013317173	-0.269701384415831	0	-0.00452724947081236	0.948657942465785
27	Ondansetron	1	178.6	27	4822.2	0.192694033348959	0.918367692417076	0.799101786428476	0.823834991889878	0.756727305748101	1	0.995310066444129	-1.64665166746123	-0.0851574321528947	-0.224266949053629	-0.193785021686715	-0.278752320630618	0	-0.00470096580143057	0.965575907608848
27	Ondansetron	1	178.6	28	5000.8	0.187099710653792	0.915599451821748	0.793199844511161	0.818494617411567	0.749970001199952	1	0.995137209874008	-1.67611359218222	-0.0881762896132237	-0.231680078363796	-0.200288458354371	-0.287722071651802	0	-0.00487465195992642	0.981946333545508
27	Ondansetron	1	178.6	29	5179.4	0.181821053961835	0.91284784971748	0.787384443605195	0.813223033205435	0.743332309186596	1	0.994964413333834	-1.7047322955731	-0.0911860609958803	-0.239038657328581	-0.206749873470883	-0.296612080972911	0	-0.00504830795677919	0.997800864878404
27	Ondansetron	1	178.6	30	5358	0.176832078660316	0.91011273654543	0.781653694119565	0.808018918628399	0.736811081638668	1	0.994791676792342	-1.7325547048505	-0.0941868008308573	-0.246343482916668	-0.21316980659109	-0.305423753927938	0	-0.00522193380246279	1.01316850707987
27	Ondansetron	1	178.6	31	5536.6	0.172109575931575	0.907393964533859	0.776005761077127	0.802880986627551	0.730403279997663	1	0.994619000218288	-1.75962393564161	-0.0971785631587243	-0.253595334758014	-0.219548786944294	-0.314158459024629	0	-0.00539552950744498	1.02807591196825
27	Ondansetron	1	178.6	32	5715.2	0.16763275174041	0.904691387671516	0.77043886215567	0.797807982678959	0.724105970495096	1	0.99444638358045	-1.78597969391317	-0.100161401536466	-0.260794975643186	-0.225887333696062	-0.322817529220036	0	-0.00556909508218885	1.04254762557594
28	Procainamide	1	35058	1	35058	0.86823173894414	0.962060823021932	1	0.917424709933625	1	1	1	-0.141296619604307	-0.0386776047205608	0	-0.0861847624383665	0	0	0	0.0331370191876594
28	Procainamide	1	35058	2	70116	0.767146216076197	0.926895182647354	1	0.847446564088282	1	1	1	-0.26507786204629	-0.0759147913871817	0	-0.165527492938609	0	0	0	0.0597636998916782
28	Procainamide	1	35058	3	105174	0.687144157489871	0.894209665511269	1	0.787387248976093	1	1	1	-0.375211172542532	-0.111815006124964	0	-0.239035094436371	0	0	0	0.0816326549649223
28	Procainamide	1	35058	4	140232	0.622252392035169	0.863750835574487	1	0.735277461055779	1	1	1	-0.474409493571203	-0.146470936520712	0	-0.307507352968683	0	0	0	0.0999148571686805
28	Procainamide	1	35058	5	175290	0.568559403381821	0.835298649804095	1	0.689636856176632	1	1	1	-0.564649479813596	-0.179965953641917	0	-0.371590115329051	0	0	0	0.115424001807565
28	Procainamide	1	35058	6	210348	0.523396503439463	0.808661133690151	1	0.649331163894853	1	1	1	-0.647415969383258	-0.212375320267576	0	-0.431812424477701	0	0	0	0.128743876108948
28	Procainamide	1	35058	7	245406	0.484880543066208	0.7836700440583	1	0.613476640636567	1	1	1	-0.72385272133848	-0.243767209389604	0	-0.488613091128082	0	0	0	0.140304595320629
28	Procainamide	1	35058	8	280464	0.451644690535404	0.760177311999343	1	0.581374521616087	1	1	1	-0.794859491161341	-0.274203567650907	0	-0.542360114287345	0	0	0	0.150430255327199
28	Procainamide	1	35058	9	315522	0.422672829273113	0.738052106976876	1	0.552465029460074	1	1	1	-0.861156852460205	-0.303740851214404	0	-0.593365142688338	0	0	0	0.159369818422272
28	Procainamide	1	35058	10	350580	0.397193851232848	0.717178399135191	1	0.526294454653551	1	1	1	-0.923330827210778	-0.33243065603268	0	-0.64189442315226	0	0	0	0.167317758258479
28	Procainamide	1	35058	11	385638	0.374612008990688	0.697452923888979	1	0.502491169314367	1	1	1	-0.981864431315451	-0.360320260196635	0	-0.688177212707069	0	0	0	0.174428230835535
28	Procainamide	1	35058	12	420696	0.35445974810341	0.678783473416732	1	0.480747868417025	1	1	1	-1.03716048500424	-0.387453092682254	0	-0.732412328393021	0	0	0	0.180825029348411
28	Procainamide	1	35058	13	455754	0.336364986589084	0.661087455400765	1	0.460808230425411	1	1	1	-1.08955843897248	-0.413869140165605	0	-0.774773308593709	0	0	0	0.186608721102576
28	Procainamide	1	35058	14	490812	0.320027929710229	0.644290671482782	1	0.442456765328656	1	1	1	-1.13934700665261	-0.439605301472882	0	-0.815412524779607	0	0	0	0.191861857436548
28	Procainamide	1	35058	15	525870	0.305204328352293	0.628326277325832	1	0.425510995553711	1	1	1	-1.18677379765309	-0.464695697551351	0	-0.854464489813262	0	0	0	0.196652838846939
28	Procainamide	1	35058	16	560928	0.291693184228869	0.613133893545059	1	0.409815367392375	1	1	1	-1.23205276806924	-0.489171943495443	0	-0.892048544143064	0	0	0	0.201038824385493
28	Procainamide	1	35058	17	595986	0.279327582329084	0.598658842574947	1	0.395236462009607	1	1	1	-1.27537005570081	-0.513063388069028	0	-0.928271055194257	0	0	0	0.205067950613518
28	Procainamide	1	35058	18	631044	0.26796776034634	0.584851491141046	1	0.381659193528158	1	1	1	-1.31688860292272	-0.536397325275871	0	-0.963227232129173	0	0	0	0.208781044305481
28	Procainamide	1	35058	19	666102	0.257495803152819	0.571666681671042	1	0.368983764714353	1	1	1	-1.35675185744682	-0.559199181803487	0	-0.997002633973638	0	0	0	0.212212958907656
28	Procainamide	1	35058	20	701160	0.247811534500515	0.559063238919354	1	0.357123209799571	1	1	1	-1.39508676324928	-0.581492683568439	0	-1.02967443125561	0	0	0	0.215393627896745
28	Procainamide	1	35058	21	736218	0.238829302184203	0.547003540448112	1	0.346001396442093	1	1	1	-1.43200619902745	-0.603300004098265	0	-1.06131246797275	0	0	0	0.218348902694533
28	Procainamide	1	35058	22	771276	0.230475437903332	0.535453141525867	1	0.335551389759954	1	1	1	-1.46761098229567	-0.624641897076422	0	-1.09198016064916	0	0	0	0.221101224903564
28	Procainamide	1	35058	23	806334	0.222686232206792	0.524380446566871	1	0.32571410413151	1	1	1	-1.50199152878169	-0.645537815036308	0	-1.1217352635801	0	0	0	0.223670169896529
28	Procainamide	1	35058	24	841392	0.215406306649061	0.513756420510497	1	0.316437185390757	1	1	1	-1.53522923590916	-0.666006015905751	0	-1.15063052347488	0	0	0	0.226072889615114
28	Procainamide	1	35058	25	876450	0.208587295137478	0.503554334588915	1	0.307674078755085	1	1	1	-1.56739764365149	-0.686063658864433	0	-1.17871424214262	0	0	0	0.228324475741329
28	Procainamide	1	35058	26	911508	0.202186768057642	0.493749541795982	1	0.299383247451207	1	1	1	-1.59856341441023	-0.705726890775374	0	-1.20603076229886	0	0	0	0.230438259469629
28	Procainamide	1	35058	27	946566	0.196167348581736	0.484319278086432	1	0.291527514359321	1	1	1	-1.6287871647534	-0.725010924281296	0	-1.23262088876319	0	0	0	0.232426060432436
28	Procainamide	1	35058	28	981624	0.190495982266556	0.475242485929829	1	0.284073504657493	1	1	1	-1.65812417510206	-0.743930108512228	0	-1.25852225509232	0	0	0	0.234298394567536
28	Procainamide	1	35058	29	1016682	0.185143329790764	0.466499657340522	1	0.276991171839776	1	1	1	-1.68662499824628	-0.762497993227652	0	-1.2837696439172	0	0	0	0.23606464861869
28	Procainamide	1	35058	30	1051740	0.180083259273118	0.458072693920876	1	0.270253392911659	1	1	1	-1.71433598351858	-0.780727387111438	0	-1.30839526782689	0	0	0	0.237733227356187
28	Procainamide	1	35058	31	1086798	0.175292419627287	0.449944781804618	1	0.263835621263458	1	1	1	-1.74129973027579	-0.798630410847753	0	-1.33242901649012	0	0	0	0.239311678366851
28	Procainamide	1	35058	32	1121856	0.170749880253331	0.442100279681887	1	0.257715587856203	1	1	1	-1.76755548182969	-0.816218545528817	0	-1.35589867477054	0	0	0	0.240806798301757
29	Quinidine	1	2960	1	2960	0.231168831168831	0.821256038647343	0.760846731841319	0.749693459050357	0.951967545638945	0.999925239045626	0.540871723282147	-1.46460696455564	-0.196920356215107	-0.273323345029959	-0.288090877267274	-0.049224335487267	-7.47637491134177e-05	-0.614573138634969	0.685433477316009
29	Quinidine	1	2960	2	5920	0.130690161527166	0.69672131147541	0.614005346547565	0.599607723783437	0.908337849345823	0.999850489268817	0.370681407462528	-2.03492593641737	-0.36136978824294	-0.487751643140717	-0.51147963127656	-0.0961388888083918	-0.000149521909026822	-0.9924123252963	0.871900329731055
29	Quinidine	1	2960	3	8880	0.0910951893551689	0.604982206405694	0.514674536809313	0.499591445718633	0.868532089717966	0.999775750667066	0.281960054985041	-2.39585028231064	-0.502556232283484	-0.664220545454503	-0.693964623137845	-0.140950745546058	-0.00022427448057526	-1.26598986706641	0.962077932873327
29	Quinidine	1	2960	4	11840	0.0699135899450118	0.534591194968553	0.443007009455709	0.428171258844268	0.832068647613644	0.999701023237868	0.227507013766556	-2.66049522882527	-0.626252945729915	-0.814169686363062	-0.848232025947387	-0.183840332413606	-0.000299021464594565	-1.48057421132326	1.01537189583277
29	Quinidine	1	2960	5	14800	0.0567240280433397	0.47887323943662	0.38885906594541	0.374617058587395	0.798543524127135	0.999626306978717	0.190681905178542	-2.86955738300089	-0.736319352425154	-0.944538299350438	-0.981850951868575	-0.224965805452322	-0.000373762861919687	-1.65714865719898	1.05071940066493
29	Quinidine	1	2960	6	17760	0.0477211796246649	0.433673469387755	0.346506236891489	0.332970272858726	0.767615309126595	0.99955160188711	0.164117287146421	-3.04237996234578	-0.835463402740201	-1.05985446082733	-1.09970206368108	-0.264466570901311	-0.000448498673385917	-1.80717394123999	1.07608667784814
29	Quinidine	1	2960	7	20720	0.041184636742249	0.396270396270396	0.312473039784982	0.299656926534958	0.73899351262833	0.999476907960542	0.144049241954806	-3.18968998677475	-0.925658481877755	-1.16323708621544	-1.20511703692725	-0.302466136653888	-0.000523228899828106	-1.93760007984097	1.09539202328485
29	Quinidine	1	2960	8	23680	0.0362230362230362	0.36480686695279	0.284527298546696	0.272403250833449	0.712429412836238	0.999402225196511	0.128354253322045	-3.31806000278904	-1.00838719707538	-1.25692607730645	-1.30047177073449	-0.339074441450585	-0.00059795354208067	-2.05296123374857	1.11077221527734
29	Quinidine	1	2960	9	26640	0.0323283690519433	0.337972166998012	0.261169814460438	0.2496937094253	0.687708809565676	0.999327553592515	0.115743353138381	-3.43181013541047	-1.08479173304948	-1.34258445311084	-1.38752027454358	-0.374389772551285	-0.000672672600978583	-2.15638001195508	1.12348235319637
29	Quinidine	1	2960	10	29600	0.0291898983273204	0.314814814814815	0.241356331855345	0.230479260636154	0.664646235767292	0.999252893146052	0.105388823404963	-3.53393257725611	-1.15577070250806	-1.42148088206193	-1.46759439614161	-0.408500356165659	-0.000747386077355605	-2.25009868829861	1.13430254908833
29	Quinidine	1	2960	11	32560	0.0266068759342302	0.294627383015598	0.224337137003597	0.214010693896272	0.643080295971499	0.999178243854622	0.0967348184314922	-3.62658560283019	-1.22204382945784	-1.49460528270975	-1.54172929373091	-0.441485685446924	-0.000822093972046278	-2.33578187482153	1.14373991555433
29	Quinidine	1	2960	12	35520	0.0244438341115078	0.276872964169381	0.209560050737699	0.199738653389057	0.622869883739449	0.999103605715725	0.0893942112954085	-3.71137727844329	-1.28419649109688	-1.56274494232677	-1.61074550000895	-0.473417636358595	-0.00089679628588415	-2.41469934950972	1.15213640449845
29	Quinidine	1	2960	13	38480	0.0226060452120904	0.261136712749616	0.196609390984822	0.187251164313398	0.603891090637707	0.999028978726862	0.0830890938118045	-3.7895379212116	-1.34271120515831	-1.62653630544741	-1.67530443864207	-0.504361410819489	-0.000971493019703107	-2.48784182746889	1.15972978467939
29	Quinidine	1	2960	14	41440	0.0210252775809119	0.247093023255814	0.185166250466996	0.176233215056008	0.586034663603217	0.998954362885535	0.0776147973379037	-3.86202987078878	-1.39799040088308	-1.68650120627608	-1.73594707554956	-0.534376338248076	-0.00104618417433704	-2.55599718262736	1.16668977742378
29	Quinidine	1	2960	15	44400	0.0196511371163612	0.23448275862069	0.174981883048107	0.166439815640518	0.569203900451172	0.998879758189245	0.0728172572932111	-3.92962007382407	-1.45037321780441	-1.74307283585714	-1.79312150253133	-0.563516560275562	-0.00112086975061884	-2.61980230114066	1.1731403254472
29	Quinidine	1	2960	16	47360	0.0184455958549223	0.223097112860892	0.165859414903922	0.157677566228846	0.553312897901438	0.998805164635497	0.0685782838712215	-3.99292964404095	-1.50014811863638	-1.79661474761559	-1.84720305113219	-0.591831618485067	-0.00119554974938209	-2.67977935601051	1.17917377951237
29	Quinidine	1	2960	17	50320	0.0173794180824058	0.212765957446809	0.157640993019402	0.149791756426828	0.538285085103455	0.998730582221794	0.0648056944263758	-4.05246864173041	-1.54756250871601	-1.84743502738945	-1.89850923994177	-0.619366961204889	-0.00127022417145945	-2.73636180253462	1.18486019833673
29	Quinidine	1	2960	18	53280	0.0164297581687281	0.203349282296651	0.150198574094454	0.142657151362528	0.524051989816428	0.998656010945641	0.0614265330209453	-4.10866106592576	-1.59283017603444	-1.8957970330763	-1.94731107034978	-0.646164382375873	-0.00134489301768372	-2.78991340328038	1.19025359881173
29	Quinidine	1	2960	19	56240	0.0155785051636618	0.194730813287514	0.143427205020028	0.136171291211956	0.510552195291763	0.998581450804542	0.0583823061596933	-4.16186318899232	-1.63613711878934	-1.94192765458395	-1.99384169153799	-0.672262403133282	-0.00141955628888794	-2.84074241177226	1.19539624975216
29	Quinidine	1	2960	20	59200	0.0148111166583458	0.186813186813187	0.137240042555052	0.130249539046947	0.497730454333348	0.998506901796006	0.0556255682996475	-4.21237725460179	-1.67764616246063	-1.98602375091432	-2.03830313734189	-0.697696604848324	-0.00149421398590412	-2.88911232192505	1.20032167964099
29	Quinidine	1	2960	21	62160	0.0141157811260904	0.179514255543823	0.131564608743032	0.124821366973833	0.485536933581626	0.998432363917537	0.0531174311088092	-4.26046187866688	-1.71750065613582	-2.02825722678329	-2.08087162797529	-0.722499920855561	-0.00156886610956486	-2.93525013513378	1.20505682063341
29	Quinidine	1	2960	22	65120	0.0134828056355098	0.172764227642276	0.126339938554007	0.11982753377351	0.473926566223694	0.998357837166644	0.0508257174923842	-4.30634006195663	-1.75582746000199	-2.06877907986593	-2.1217017885434	-0.746702892867662	-0.00164351266070184	-2.97935280264884	1.20962356111987
29	Quinidine	1	2960	23	68080	0.0129041612295201	0.166503428011753	0.121514381201853	0.115217913978075	0.462858495404158	0.998283321540835	0.048723573714142	-4.35020544369915	-1.7927393811144	-2.10772265940472	-2.16093003952782	-0.770333897085868	-0.00171815364014733	-3.02159230617412	1.21403988619563
29	Quinidine	1	2960	24	71040	0.0123731405533157	0.160680529300567	0.117043886796674	0.110949809462427	0.452295593847577	0.998208817037619	0.0467884122532773	-4.39222724013522	-1.82833717536798	-2.14520631369084	-2.19867734693329	-0.793419344204916	-0.00179278904873259	-3.06211970814253	1.21832072643482
29	Quinidine	1	2960	25	74000	0.0118840966751235	0.155251141552511	0.112890657779589	0.106986622900966	0.442204047789545	0.998134323654507	0.0450010969581994	-4.43255418651723	-1.86271120520034	-2.18133555899531	-2.23505147195297	-0.815983856847758	-0.00186741888728932	-3.10106841266005	1.22247859720191
29	Quinidine	1	2960	26	76960	0.011432241490045	0.15017667844523	0.109022077636408	0.103296805727901	0.432552995391705	0.998059841389008	0.0433453080910413	-4.47131771453596	-1.89594282171287	-2.21620487013988	-2.27014882562021	-0.838050427419137	-0.00194204315664913	-3.13855681480719	1.22652408555755
29	Quinidine	1	2960	27	79920	0.0110134884296498	0.145423438836612	0.105409852580678	0.0998530165398629	0.42331421149475	0.997985370238635	0.0418070425743643	-4.50863453650131	-1.92810552442181	-2.24989916924863	-2.30405600886195	-0.859640558915231	-0.00201666185764261	-3.17469047100274	1.23046622492157
29	Quinidine	1	2960	28	82880	0.0106243285185627	0.140961857379768	0.102029318396048	0.0966314424140694	0.414461831926243	0.997910910200898	0.0403742170041798	-4.54460876442167	-1.95926594023687	-2.2824950717441	-2.33685109989544	-0.880774390851095	-0.00209127499110125	-3.20956389071269	1.23431278614144
29	Quinidine	1	2960	29	85840	0.0102617318113686	0.136765888978278	0.0988588765130122	0.0936112474988253	0.405972111691637	0.997836461273312	0.0390363495919487	-4.57933366095232	-1.98948465446045	-2.31406193559221	-2.36860473713216	-0.901470812154386	-0.00216588255785533	-3.24326202611364	1.23807050565226
29	Quinidine	1	2960	30	88800	0.00992306834652693	0.1328125	0.0958795320565686	0.090774121875176	0.397823212287661	0.997762023453389	0.0377843033146597	-4.61289309638586	-2.0188169198634	-2.34466274993925	-2.39938103537021	-0.92174756261141	-0.00224048455873567	-3.27586151882527	1.2417452658352
29	Quinidine	1	2960	31	91760	0.00960604425256341	0.129081245254366	0.0930745129821995	0.088103910042683	0.389995014126641	0.997687596738644	0.0366100769578044	-4.64536276898732	-2.04731326469302	-2.37435489176781	-2.42923836515558	-0.941621324230828	-0.00231508099457287	-3.30743174975429	1.24534223872375
29	Quinidine	1	2960	32	94720	0.00930864972283234	0.125553914327917	0.0904289541661465	0.0855863031022682	0.382468950679662	0.997613181126593	0.0355066339466637	-4.67681123335331	-2.07502001642196	-2.4031907734172	-2.45823001912501	-0.961107803704084	-0.00238967186619666	-3.33803572822211	1.24886600136759
30	Sotalol	1	18358	1	18358	0.945743857098103	0.991333853862284	1	0.913265740014552	0.983584862807795	0.994017502341445	0.999574670766027	-0.0557835107604039	-0.00870391555064354	0	-0.0907283782901423	-0.0165513583398593	-0.00600046449120063	-0.00042541971210808	-0.0152666934171999
30	Sotalol	1	18358	2	36716	0.897072180670337	0.982816621394701	1	0.84037632164719	0.967699935603968	0.9881061595555	0.999149703188145	-0.10861895118606	-0.0173327261921035	0	-0.173905485506754	-0.0328332236406925	-0.0119651380636795	-0.000850658519242642	-0.0277424976716979
30	Sotalol	1	18358	3	55074	0.853164975444846	0.974444497033513	1	0.778261814843744	0.95231993794337	0.982264709689843	0.998725096805279	-0.158802344042311	-0.0258877169838723	0	-0.250692288479485	-0.0488542313811535	-0.0178944451506415	-0.00127571657519348	-0.0379674461754396
30	Sotalol	1	18358	4	73432	0.813355293926269	0.966213803790503	1	0.724697449124964	0.937421171401496	0.976491920458227	0.998300851157135	-0.206587248998493	-0.0343701402835877	0	-0.322001022777934	-0.0646226085112198	-0.0237888026799432	-0.00170059403355533	-0.046352342950096
30	Sotalol	1	18358	5	91790	0.777095121299692	0.958120987868363	1	0.678031498824933	0.922981397729466	0.970786588373832	0.997876965784201	-0.252192514872233	-0.0427812168472909	0	-0.388561533677048	-0.0801461988216393	-0.0296486202500137	-0.0021252910477266	-0.053215467513126
30	Sotalol	1	18358	6	110148	0.743929996187359	0.950162613544432	1	0.63701194273813	0.908979728099373	0.965147537912826	0.997453440227747	-0.295808339721918	-0.0511221368837978	0	-0.450966875174216	-0.0954324863741582	-0.035474300300652	-0.00254980777091034	-0.0588073504676767
30	Sotalol	1	18358	7	128506	0.713479864260456	0.942335358307314	1	0.600672454833036	0.895396522279908	0.959573620706903	0.99703027402982	-0.337601063542016	-0.0593940610654588	0	-0.509705493291373	-0.110488617167729	-0.0412662382788789	-0.00297414435611463	-0.0633279400685878
30	Sotalol	1	18358	8	146864	0.685424449090099	0.934636008231918	1	0.568255312143554	0.882213296718808	0.954063714763644	0.996607466733244	-0.377716998905439	-0.067598121497457	0	-0.565184468042314	-0.125321419197714	-0.0470248228000134	-0.00339830095615285	-0.0669387699861702
30	Sotalol	1	18358	9	165222	0.659491943893723	0.927061453579384	1	0.539157987515411	0.869412640627495	0.948616723713583	0.996185017881618	-0.416285522375158	-0.0757354226476688	0	-0.617746638748661	-0.139937421049022	-0.052750435804135	-0.00382227772364433	-0.0697717575712043
30	Sotalol	1	18358	10	183580	0.63545017673458	0.919608684609254	1	0.512895351305455	0.856978139266738	0.943231576082923	0.995762927019314	-0.453421591529019	-0.0838070422389937	0	-0.6676834481775	-0.154342869149915	-0.058443452708097	-0.00424607481101397	-0.0719356789701563
30	Sotalol	1	18358	11	201938	0.613099640187149	0.91227478759202	1	0.489072407005399	0.844894303722604	0.937907224590877	0.995341193691479	-0.489227811088323	-0.0918140321059603	0	-0.715244728883097	-0.168543743800611	-0.0641042425532325	-0.00466969237049302	-0.0735210101030334
30	Sotalol	1	18358	12	220296	0.592267942016968	0.905056941010974	1	0.467364287855782	0.833146506540957	0.932642645470678	0.994919817444026	-0.523796141734377	-0.09975741901731	0	-0.760646265753284	-0.182545774079623	-0.0697331681489067	-0.00509313055411951	-0.0746035974150141
30	Sotalol	1	18358	13	238654	0.572805350001969	0.897952411942938	1	0.447501354310876	0.821720922658133	0.927436837813333	0.99449879782364	-0.557209323292083	-0.107638205466165	0	-0.804075714878788	-0.196354451720833	-0.0753305862120487	-0.00551638951373814	-0.0752474770269421
30	Sotalol	1	18358	14	257012	0.554581187219677	0.890958552608133	1	0.42925793671943	0.810604475126233	0.922288822933221	0.99407813437777	-0.589542067725104	-0.115457370429306	0	-0.845697289638898	-0.209975044045417	-0.0808968475028026	-0.00593946940100112	-0.0755070650769029
30	Sotalol	1	18358	15	275370	0.537480894233838	0.884072797080034	1	0.41244372372885	0.799784785185077	0.917197643754717	0.993657826654632	-0.620862065223544	-0.123215870096992	0	-0.885655509838456	-0.223412606024836	-0.0864322969564224	-0.00636237036736839	-0.0754288775810973
30	Sotalol	1	18358	16	293728	0.521403618541113	0.877292658146623	1	0.396897098318783	0.78925012628002	0.91216236421901	0.993237874203207	-0.651230837458654	-0.130914638574686	0	-0.924078230082068	-0.236671991544023	-0.0919372738115359	-0.00678509256410747	-0.0750528940020187
30	Sotalol	1	18358	17	312086	0.506260224083432	0.870615724314971	1	0.382479926234601	0.778989381666556	0.907182068710359	0.992818276573235	-0.68070446504496	-0.138554588557978	0	-0.961079107525109	-0.24975786392758	-0.0974121117348996	-0.00720763614229437	-0.0744136479950506
30	Sotalol	1	18358	18	330444	0.491971637835079	0.864039656951569	1	0.369073440459461	0.76899200527948	0.902255861501036	0.99239903331522	-0.709334210828131	-0.146136611981918	0	-0.996759629109188	-0.262674705786088	-0.102857138942756	-0.00763000125281345	-0.0735411071101305
30	Sotalol	1	18358	19	348802	0.478467468697761	0.857562187551301	1	0.356574961907538	0.759247985577049	0.897382866214267	0.991980143980422	-0.73716705640287	-0.153661580645915	0	-1.03121078940141	-0.275426828234577	-0.108272678318903	-0.00805218804635796	-0.072461387693209
30	Sotalol	1	18358	20	367160	0.465684847779265	0.851181115128326	1	0.344895264604075	0.749747812099567	0.892562225304469	0.991561608120861	-0.764246165964473	-0.161130346815303	0	-1.06451448889853	-0.288018379530579	-0.113659047529588	-0.00847419667343095	-0.0711973399720111
30	Sotalol	1	18358	21	385518	0.45356744973197	0.844894303722604	1	0.333956442266827	0.740482444507573	0.887793099554162	0.991143425289309	-0.79061128899361	-0.168543743800611	0	-1.09674470688464	-0.300453353175067	-0.119016559135317	-0.00889602728434436	-0.069769030052023
30	Sotalol	1	18358	22	403876	0.442064663008582	0.838699680016103	1	0.323690168392568	0.731443283887767	0.883074667586916	0.990725595039297	-0.816299111205208	-0.175902586515508	0	-1.12796849110135	-0.312735595515888	-0.124345520699693	-0.00931768002922017	-0.0681941394259867
30	Sotalol	1	18358	23	422234	0.431130883252451	0.832595231053106	1	0.314036267696017	0.72262214613522	0.878406125395753	0.990308116925104	-0.841343561538273	-0.183207672014382	0	-1.15824679752714	-0.32486881288988	-0.129646234895364	-0.00973915505799047	-0.0664882980153462
30	Sotalol	1	18358	24	440592	0.420724909018238	0.826579002059363	1	0.304941535782121	0.714011237238672	0.873786685886425	0.989890990501764	-0.865776081632977	-0.190459780010415	0	-1.18763520670909	-0.336856578336888	-0.134918999607179	-0.010160452520398	-0.0646653632965634
30	Sotalol	1	18358	25	458950	0.410809422941139	0.820649094355107	1	0.296358758144883	0.705603130312069	0.869215578435032	0.989474215325056	-0.889625863164666	-0.197659673375012	0	-1.21618453780255	-0.348702337916078	-0.14016410803264	-0.0105815725659964	-0.0627376554227507
30	Sotalol	1	18358	26	477308	0.40135054458252	0.81480366335727	1	0.288245890296567	0.697390744230043	0.864692048459449	0.989057790951511	-0.912920057528631	-0.204808098619379	0	-1.24394137736196	-0.360409416652514	-0.14538184877973	-0.0110025153441503	-0.0607161562195726
30	Sotalol	1	18358	27	495666	0.392317443659537	0.809040916666474	1	0.280565368973215	0.689367323738176	0.860215357004066	0.988641716938403	-0.935683961653116	-0.211905786359009	0	-1.27094853670224	-0.371981024139647	-0.15057250596221	-0.0114232810040358	-0.0586106783605097
30	Sotalol	1	18358	28	514024	0.383682004354791	0.803359112234624	1	0.273283530602666	0.681526420920631	0.855784780337369	0.988225992843754	-0.957941183129342	-0.218953451761798	0	-1.29724544910551	-0.383420259821352	-0.155736359292441	-0.0118438696946406	-0.0564300097984014
30	Sotalol	1	18358	29	532382	0.375418533005155	0.797756556609185	1	0.266370118040685	0.673861877918281	0.851399609561882	0.987810618226324	-0.979713787361175	-0.225951794980486	0	-1.32286851612432	-0.394730117975254	-0.160873684171838	-0.012264281564765	-0.0541820375651644
30	Sotalol	1	18358	30	550740	0.367503502767761	0.792231603250413	1	0.25979786033009	0.666367810800005	0.847059150236045	0.987395592645621	-1.00102242903382	-0.232901501570065	0	-1.34785141061446	-0.405913492417379	-0.165984751779004	-0.012684516763021	-0.0518738542884325
30	Sotalol	1	18358	31	569098	0.359915329918637	0.786782650918025	1	0.253542113174484	0.659038594498346	0.842762722007605	0.986980915661888	-1.02188646986504	-0.239803242890787	0	-1.37222534282741	-0.416973180946638	-0.171069829155619	-0.013104575437834	-0.0495118501666563
30	Sotalol	1	18358	32	587456	0.352634177304464	0.781408142124001	1	0.24758055013346	0.6518688487285	0.838509658258094	0.986566586836108	-1.04232408432132	-0.246657676497357	0	-1.39601929483772	-0.427911889546214	-0.176129179290167	-0.0135244577374421	-0.0471017926582415
31	Sparfloxacin	1	1766	1	1766	0.938608078982132	0.999435650404919	1	0.980500408541837	1	1	1	-0.0633572681773684	-0.000564508900252208	0	-0.0196922166789827	0	0	0	0.0267122232014883
31	Sparfloxacin	1	1766	2	3532	0.884318092493122	0.998871937431492	1	0.961746740025127	1	1	1	-0.122938447931895	-0.00112869930998827	0	-0.0390041269836274	0	0	0	0.0513362213977899
31	Sparfloxacin	1	1766	3	5298	0.835965075236857	0.998308860003103	1	0.943696996748071	1	1	1	-0.179168442802546	-0.00169257158838404	0	-0.0579501423822183	0	0	0	0.0741247226898294
31	Sparfloxacin	1	1766	4	7064	0.792625645843119	0.99774641704556	1	0.926312275723942	1	1	1	-0.232404242146795	-0.00225612609400833	0	-0.0765438703820911	0	0	0	0.0952891227324924
31	Sparfloxacin	1	1766	5	8830	0.7535584705554	0.997184607487095	1	0.909556488784185	1	1	1	-0.282948665312533	-0.00281936318482397	0	-0.0947981732394558	0	0	0	0.115007914451567
31	Sparfloxacin	1	1766	6	10596	0.718161506543249	0.996623430258348	1	0.893396112519619	1	1	1	-0.331060795753726	-0.00338228321818925	0	-0.112725221406003	0	0	0	0.133433082051613
31	Sparfloxacin	1	1766	7	12362	0.685940755042935	0.996062884292367	1	0.877799964413515	1	1	1	-0.376964017896917	-0.0039448865508594	0	-0.130336542268543	0	0	0	0.150695021257756
31	Sparfloxacin	1	1766	8	14128	0.65648706477339	0.995502968524599	1	0.86273900202083	1	1	1	-0.420852288748874	-0.00450717353898771	0	-0.14764306467052	0	0	0	0.166906374792855
31	Sparfloxacin	1	1766	9	15894	0.629458665547629	0.994943681892884	1	0.848186142472348	1	1	1	-0.462895090008441	-0.00506914453812726	0	-0.164655159646024	0	0	0	0.182165057411599
31	Sparfloxacin	1	1766	10	17660	0.604567845947156	0.994385023337446	1	0.834116099943641	1	1	1	-0.503241380407683	-0.00563079990323155	0	-0.181382677746487	0	0	0	0.196556667205011
31	Sparfloxacin	1	1766	11	19426	0.581570671606428	0.993826991800888	1	0.82050523903683	1	1	1	-0.542022781120926	-0.00619213998865725	0	-0.197834983296471	0	0	0	0.210156426393964
31	Sparfloxacin	1	1766	12	21192	0.560258964143426	0.993269586228186	1	0.807331442286712	1	1	1	-0.579356166173099	-0.00675316514816355	0	-0.214020985876808	0	0	0	0.223030757335244
31	Sparfloxacin	1	1766	13	22958	0.540453981344329	0.992712805566683	1	0.794573990228887	1	1	1	-0.615345786426124	-0.00731387573491536	0	-0.229949169300119	0	0	0	0.235238572779143
31	Sparfloxacin	1	1766	14	24724	0.522001392003712	0.992156648766078	1	0.782213452661992	1	1	1	-0.650085024429276	-0.0078742721014834	0	-0.245627618314634	0	0	0	0.246832340159353
31	Sparfloxacin	1	1766	15	26490	0.504767246214246	0.991601114778424	1	0.770231589903721	1	1	1	-0.68365785453883	-0.00843435459984609	0	-0.261064043246738	0	0	0	0.257858965617354
31	Sparfloxacin	1	1766	16	28256	0.488634718401622	0.991046202558119	1	0.758611262985238	1	1	1	-0.716140065782343	-0.00899412358139098	0	-0.276265802770276	0	0	0	0.268360533048633
31	Sparfloxacin	1	1766	17	30022	0.473501455578549	0.990491911061902	1	0.747336351854034	1	1	1	-0.747600292277205	-0.00955357939691562	0	-0.291239924970946	0	0	0	0.27837492566826
31	Sparfloxacin	1	1766	18	31788	0.459277403551745	0.989938239248843	1	0.736391680764255	1	1	1	-0.778100886440109	-0.0101127223966292	0	-0.305993126856698	0	0	0	0.287936351707286
31	Sparfloxacin	1	1766	19	33554	0.445883013508604	0.989385186080339	1	0.725762950128316	1	1	1	-0.807698662919357	-0.0106715529301538	0	-0.320531832449733	0	0	0	0.297075791361269
31	Sparfloxacin	1	1766	20	35320	0.433247753530167	0.988832750520105	1	0.715436674186271	1	1	1	-0.836445535558164	-0.0112300713465257	0	-0.334862189582055	0	0	0	0.305821378656518
31	Sparfloxacin	1	1766	21	37086	0.421308866211029	0.988280931534172	1	0.705400123921643	1	1	1	-0.864389065331284	-0.0117882779941966	0	-0.348990085504494	0	0	0	0.314198729217832
31	Sparfloxacin	1	1766	22	38852	0.410010326185993	0.987729728090876	1	0.695641274715633	1	1	1	-0.891572933781446	-0.012346173221035	0	-0.362921161408384	0	0	0	0.322231222824022
31	Sparfloxacin	1	1766	23	40618	0.399301961016297	0.987179139160852	1	0.686148758287101	1	1	1	-0.918037353789791	-0.0129037573743279	0	-0.376660825949542	0	0	0	0.329940247985053
31	Sparfloxacin	1	1766	24	42384	0.38913870632999	0.986629163717032	1	0.676911818514453	1	1	1	-0.943819427377826	-0.013461030800781	0	-0.390214267855698	0	0	0	0.337345414463737
31	Sparfloxacin	1	1766	25	44150	0.379479971890372	0.986079800734633	1	0.667920270778488	1	1	1	-0.968953458531532	-0.014017993846521	0	-0.403586467690904	0	0	0	0.344464738618218
31	Sparfloxacin	1	1766	26	45916	0.370289099786055	0.985531049191155	1	0.659164464503103	1	1	1	-0.993471227666346	-0.014574646857097	0	-0.416782208843698	0	0	0	0.351314805600668
31	Sparfloxacin	1	1766	27	47682	0.361532899493854	0.984982908066372	1	0.650635248604212	1	1	1	-1.01740223324257	-0.0151309901774805	0	-0.429806087799655	0	0	0	0.357910911768123
31	Sparfloxacin	1	1766	28	49448	0.353181247383843	0.984435376342326	1	0.642323939586829	1	1	1	-1.04077390513907	-0.0156870241520685	0	-0.442662523753566	0	0	0	0.364267190109417
31	Sparfloxacin	1	1766	29	51214	0.345206740481244	0.983888453003322	1	0.634222292056509	1	1	1	-1.0636117936563	-0.0162427491246834	0	-0.455355767611513	0	0	0	0.370396721041261
31	Sparfloxacin	1	1766	30	52980	0.337584396099025	0.983342137035919	1	0.626322471434617	1	1	1	-1.08593973741434	-0.0167981654385744	0	-0.467889910428747	0	0	0	0.376311630556515
31	Sparfloxacin	1	1766	31	54746	0.330291390404423	0.982796427428929	1	0.618617028687668	1	1	1	-1.10778001291233	-0.0173532734364197	0	-0.480268891325265	0	0	0	0.382023177402498
31	Sparfloxacin	1	1766	32	56512	0.323306830156145	0.982251323173405	1	0.611098876899361	1	1	1	-1.12915346810167	-0.0179080734603265	0	-0.492496504917416	0	0	0	0.387541830714417
32	Tedisamil	1	85	1	85	0.721311475409836	0.995767986059248	1	1	0.986892829606785	1	1	-0.32668423025505	-0.00424099425725462	0	0	-0.013193827402781	0	0	0.206909143211894
32	Tedisamil	1	85	2	170	0.564102564102564	0.991571641051066	1	1	0.974124809741248	1	1	-0.572519192771331	-0.00846407841212936	0	0	-0.026215842130893	0	0	0.363941137735369
32	Tedisamil	1	85	3	255	0.463157894736842	0.987410515921995	1	1	0.96168294515402	1	1	-0.76968725768228	-0.0126694031006629	0	0	-0.0390704614814488	0	0	0.490922282030148
32	Tedisamil	1	85	4	340	0.392857142857143	0.983284169124877	1	1	0.949554896142433	1	1	-0.934309237376833	-0.0168571170664228	0	0	-0.0517619345585896	0	0	0.597784852852549
32	Tedisamil	1	85	5	425	0.341085271317829	0.979192166462668	1	1	0.937728937728938	1	1	-1.07562277044341	-0.0210273671920756	0	0	-0.0642943507053973	0	0	0.690221010440781
32	Tedisamil	1	85	6	510	0.301369863013699	0.975134080936129	1	1	0.926193921852388	1	1	-1.19941698779008	-0.0251802985302983	0	0	-0.0766716474139523	0	0	0.771798562625818
32	Tedisamil	1	85	7	595	0.269938650306748	0.97110949259529	1	1	0.91493924231594	1	1	-1.3095605668885	-0.029316054334053	0	0	-0.0888976177518184	0	0	0.8449022522766
32	Tedisamil	1	85	8	680	0.244444444444444	0.967117988394584	1	1	0.903954802259887	1	1	-1.40876721697195	-0.0334347760862375	0	0	-0.100975917340002	0	0	0.911205300603394
32	Tedisamil	1	85	9	765	0.223350253807107	0.963159162051529	1	1	0.893230983949756	1	1	-1.49901409481973	-0.0375366035287258	0	0	-0.112910070914509	0	0	0.971927154878695
32	Tedisamil	1	85	10	850	0.205607476635514	0.959232613908873	1	1	0.882758620689655	1	1	-1.58178638110359	-0.0416216746908194	0	0	-0.124703478500957	0	0	1.02798415057498
32	Tedisamil	1	85	11	935	0.19047619047619	0.955337950800095	1	1	0.87252897068848	1	1	-1.65822807660353	-0.0456901259171158	0	0	-0.136359421229319	0	0	1.08008240461311
32	Tedisamil	1	85	12	1020	0.17741935483871	0.951474785918173	1	1	0.862533692722372	1	1	-1.72923911224672	-0.049742091894814	0	0	-0.147881066813663	0	0	1.12877763768209
32	Tedisamil	1	85	13	1105	0.166037735849057	0.947642738687515	1	1	0.852764823451033	1	1	-1.79554019206796	-0.0537777056804711	0	0	-0.159271474719799	0	0	1.17451511984431
32	Tedisamil	1	85	14	1190	0.156028368794326	0.943841434638981	1	1	0.843214756258234	1	1	-1.85771743701985	-0.0577970987262166	0	0	-0.170533601041912	0	0	1.21765717330169
32	Tedisamil	1	85	15	1275	0.147157190635451	0.940070505287897	1	1	0.833876221498371	1	1	-1.91625393947243	-0.0618004009054468	0	0	-0.181670303107635	0	0	1.25850261200546
32	Tedisamil	1	85	16	1360	0.139240506329114	0.936329588014981	1	1	0.824742268041237	1	1	-1.97155257966865	-0.0657877405380031	0	0	-0.192684343829501	0	0	1.29730079850549
32	Tedisamil	1	85	17	1445	0.132132132132132	0.932618325950105	1	1	0.815806246016571	1	1	-2.02395285606218	-0.0697592444148527	0	0	-0.20357839581937	0	0	1.33426201323808
32	Tedisamil	1	85	18	1530	0.125714285714286	0.928936367858802	1	1	0.807061790668348	1	1	-2.0737435205652	-0.0737150378222807	0	0	-0.21435504528113	0	0	1.36956523953534
32	Tedisamil	1	85	19	1615	0.119891008174387	0.925283368031459	1	1	0.798502807236432	1	1	-2.12117221413631	-0.0776552445656043	0	0	-0.22501679569589	0	0	1.40336410074919
32	Tedisamil	1	85	20	1700	0.114583333333333	0.921658986175115	1	1	0.790123456790123	1	1	-2.16645291866947	-0.0815799869924229	0	0	-0.235566071312767	0	0	1.4357914521292
32	Tedisamil	1	85	21	1785	0.109725685785536	0.918062887307781	1	1	0.781918142944411	1	1	-2.20977179338831	-0.0854893860154145	0	0	-0.246005220457472	0	0	1.46696297747451
32	Tedisamil	1	85	22	1870	0.105263157894737	0.914494741655236	1	1	0.773881499395405	1	1	-2.2512917986065	-0.0893835611346854	0	0	-0.256336518669974	0	0	1.49698003872738
32	Tedisamil	1	85	23	1955	0.101149425287356	0.910954224550216	1	1	0.766008378216637	1	1	-2.29115639717042	-0.0932626304596898	0	0	-0.266562171681731	0	0	1.52593195734853
32	Tedisamil	1	85	24	2040	0.0973451327433628	0.907441016333938	1	1	0.758293838862559	1	1	-2.32949254591397	-0.0971267107307228	0	0	-0.27668431824224	0	0	1.55389785827368
32	Tedisamil	1	85	25	2125	0.093816631130064	0.903954802259887	1	1	0.750733137829912	1	1	-2.36641313452802	-0.100975917340002	0	0	-0.286705032803954	0	0	1.58094817341581
32	Tedisamil	1	85	26	2210	0.0905349794238683	0.90049527239982	1	1	0.743321718931475	1	1	-2.40201898998223	-0.104810364352345	0	0	-0.296626328074013	0	0	1.60714587748946
32	Tedisamil	1	85	27	2295	0.0874751491053678	0.897062121551918	1	1	0.73605520414031	1	1	-2.43640053618148	-0.108630164525449	0	0	-0.30645015744062	0	0	1.63254751140514
32	Tedisamil	1	85	28	2380	0.0846153846153846	0.893655049151028	1	1	0.728929384965831	1	1	-2.46963917765721	-0.112435429329788	0	0	-0.316178417281399	0	0	1.6572040356179
32	Tedisamil	1	85	29	2465	0.0819366852886406	0.890273759180948	1	1	0.721940214326001	1	1	-2.5018084605906	-0.116226268968132	0	0	-0.325812949160545	0	0	1.68116154626421
32	Tedisamil	1	85	30	2550	0.0794223826714801	0.886917960088692	1	1	0.715083798882682	1	1	-2.53297505282902	-0.120002792394696	0	0	-0.335355541921138	0	0	1.70446187975323
32	Tedisamil	1	85	31	2635	0.0770577933450088	0.883587364700685	1	1	0.708356391809629	1	1	-2.56319957573775	-0.123765107333931	0	0	-0.344807933678566	0	0	1.72714312604584
32	Tedisamil	1	85	32	2720	0.0748299319727891	0.880281690140845	1	1	0.701754385964912	1	1	-2.59253731398037	-0.12751332029896	0	0	-0.354171813720614	0	0	1.74924006669736
33	Terfenadine	1	9	1	9	0.847715736040609	0.994406463642014	0.999551457762272	0.987306064880113	0.995520159283226	1	0.999962495311914	-0.165209916321233	-0.00560923876451059	-0.000448642862887895	-0.0127751914887229	-0.00448990527285197	0	-3.75053914044535e-05	0.0956148039194749
33	Terfenadine	1	9	2	18	0.73568281938326	0.988875154511743	0.99910331772442	0.974930362116992	0.991080277502478	1	0.999924993436926	-0.306956205064647	-0.0111871893905644	-0.000897084535616206	-0.0253892340048196	-0.00895974137147176	0	-7.50093762071644e-05	0.176868172240116
33	Terfenadine	1	9	3	27	0.649805447470817	0.98340503995083	0.998655579345715	0.962861072902338	0.986679822397632	1	0.999887494374719	-0.431082272478465	-0.0167341989911652	-0.00134532519854881	-0.0378461424901146	-0.0134096869099178	0	-0.000112511954513892	0.247357219763265
33	Terfenadine	1	9	4	36	0.581881533101045	0.97799511002445	0.998208242086403	0.951086956521739	0.982318271119843	1	0.999849998124977	-0.541488403342866	-0.0222506089348197	-0.00179336503180599	-0.0501497836854716	-0.017839918128331	0	-0.000150013126429877	0.309482186524047
33	Terfenadine	1	9	5	45	0.526813880126183	0.972644376899696	0.997761305407691	0.939597315436242	0.97799511002445	1	0.999812504687383	-0.640907961460525	-0.0277367549715996	-0.00224120421526683	-0.0623038833361549	-0.0222506089348197	0	-0.000187512892060728	0.364924574247162
33	Terfenadine	1	9	6	54	0.481268011527378	0.967351874244256	0.997314768771755	0.928381962864721	0.973709834469328	1	0.999775014061621	-0.731330967530104	-0.033192967355764	-0.00268884292856836	-0.0743120329645515	-0.0266419309464211	0	-0.000225011251511979	0.414908066885666
33	Terfenadine	1	9	7	63	0.442970822281167	0.962116656644618	0.996868631641732	0.91743119266055	0.969461948618517	1	0.999737526247375	-0.814251375031256	-0.038619570965055	-0.00313628135110694	-0.0861776962410524	-0.0310140535291695	0	-0.000262508204888865	0.460350849058251
33	Terfenadine	1	9	8	72	0.41031941031941	0.956937799043062	0.996422893481717	0.906735751295337	0.965250965250965	1	0.999700041244329	-0.89081937302584	-0.0440168854167742	-0.00358351966203779	-0.0979042149813714	-0.0353671438372914	0	-0.000300003752296991	0.501959421123715
33	Terfenadine	1	9	9	81	0.382151029748284	0.951814396192742	0.995977553756766	0.89628681177977	0.961076405574243	1	0.999662559052166	-0.961939382678835	-0.049385225180743	-0.00403055804027598	-0.109494814796281	-0.0397013668515521	0	-0.000337497893841774	0.540288961702917
33	Terfenadine	1	9	10	90	0.357601713062098	0.946745562130178	0.99553261193289	0.886075949367089	0.956937799043062	1	0.99962507967057	-1.02833544525214	-0.0547248996892465	-0.00447739666449713	-0.120952610417662	-0.0440168854167742	0	-0.00037499062962867	0.575783603489521
33	Terfenadine	1	9	11	99	0.336016096579477	0.941730429664509	0.995088067477053	0.876095118898623	0.952834683182468	1	0.999587603099225	-1.09059621367987	-0.0600362134440594	-0.00492403571313676	-0.13228061072287	-0.0483138602785507	0	-0.000412481959762944	0.608804145017389
33	Terfenadine	1	9	12	108	0.316888045540797	0.936768149882904	0.994643919857171	0.866336633663366	0.94876660341556	1	0.999550129337815	-1.14920673612461	-0.0653194661206425	-0.00537047536439218	-0.143481723477691	-0.0525924501191706	0	-0.000449971884350122	0.639647626439361
33	Terfenadine	1	9	13	117	0.299820466786355	0.93185789167152	0.994200168542111	0.856793145654835	0.944733112895607	1	0.999512658386024	-1.20457142751053	-0.070574952669603	-0.00581671579622143	-0.154558759816598	-0.0568528115927828	0	-0.000487460403495542	0.66856147724741
33	Terfenadine	1	9	14	126	0.284497444633731	0.926998841251448	0.993756813001685	0.847457627118644	0.940733772342427	1	0.999475190243537	-1.25703100741134	-0.0758029634155007	-0.00626275718634471	-0.165514438477573	-0.0610950993598108	0	-0.000524947517304577	0.695753947409294
33	Terfenadine	1	9	15	135	0.270664505672609	0.922190201729107	0.993313852706651	0.838323353293413	0.936768149882904	1	0.999437724910036	-1.30687521148863	-0.081003784153087	-0.00670859971224491	-0.176351389807451	-0.0653194661206425	0	-0.000562433225882527	0.721401935147652
33	Terfenadine	1	9	16	144	0.258114374034003	0.91743119266055	0.992871287128713	0.829383886255924	0.932835820895522	1	0.999400262385207	-1.35435248208415	-0.0861776962410524	-0.0071542435511667	-0.187072159552552	-0.0695260626486103	0	-0.000599917529334613	0.745656954006272
33	Terfenadine	1	9	17	153	0.246676514032496	0.912721049629207	0.992429115740512	0.82063305978898	0.928936367858802	1	0.999362802668732	-1.39967746049552	-0.091324976693362	-0.00759968888011911	-0.197679212448274	-0.0737150378222807	0	-0.000637400427766649	0.768649745874727
33	Terfenadine	1	9	18	162	0.236209335219236	0.908059023836549	0.99198733801563	0.812064965197216	0.925069380203515	1	0.999325345760298	-1.44303685347982	-0.0964458982682522	-0.00804493587587345	-0.208174935620288	-0.0778865386570712	0	-0.000674881921283596	0.790493892651856
33	Terfenadine	1	9	19	171	0.226594301221167	0.903444381705251	0.991545953428586	0.803673938002296	0.921234454168586	1	0.999287891659587	-1.48459407977258	-0.101540729554961	-0.00848998471496626	-0.218561641809098	-0.0820407103362094	0	-0.000712362009990894	0.81128867650672
33	Terfenadine	1	9	20	180	0.217731421121252	0.898876404494382	0.991104961454833	0.795454545454546	0.91743119266055	1	0.999250440366285	-1.5244929889505	-0.106609735058258	-0.00893483557369752	-0.228841572428847	-0.0861776962410524	0	-0.000749840693993797	0.831121368804899
33	Terfenadine	1	9	21	189	0.209535759096612	0.894354387926216	0.990664361570758	0.78740157480315	0.913659205116492	1	0.999212991880075	-1.56286086637346	-0.111653175280847	-0.00937948862813218	-0.2390169004705	-0.0902976379807806	0	-0.000787317973397483	0.850069079355426
33	Terfenadine	1	9	22	198	0.201934703748488	0.889877641824249	0.990224153253678	0.779510022271715	0.909918107370337	1	0.999175546200642	-1.59981088260694	-0.116671306803693	-0.00982394405410098	-0.249089733258795	-0.0944006754214842	0	-0.0008247938483075	0.868200263547766
33	Terfenadine	1	9	23	207	0.194865810968495	0.885445489762037	0.989784335981839	0.771775082690187	0.906207521522429	1	0.999138103327671	-1.63544410618102	-0.121664382364356	-0.0102682020271998	-0.259062115071732	-0.098486946714654	0	-0.000862268318828762	0.885575960589082
33	Terfenadine	1	9	24	216	0.188275084554679	0.881057268722467	0.989344909234412	0.764192139737991	0.902527075812274	1	0.999100663260845	-1.66985116989282	-0.126632650933366	-0.010712262722791	-0.268936029630726	-0.102556588325092	0	-0.000899741385066888	0.902250818404187
33	Terfenadine	1	9	25	225	0.182115594329335	0.876712328767123	0.988905872491494	0.756756756756757	0.898876404494382	1	0.99906322599985	-1.70311365983971	-0.131576357788719	-0.011156126316003	-0.27871340246902	-0.106609735058258	0	-0.000937213047126754	0.918273947813119
33	Terfenadine	1	9	26	234	0.176346356916579	0.872410032715376	0.988467225234105	0.749464668094218	0.895255147717099	1	0.99902579154437	-1.73530528076932	-0.136495744588538	-0.0115997929817311	-0.288396103185438	-0.110646520087064	0	-0.000974683305113937	0.933689638990869
33	Terfenadine	1	9	27	243	0.17093142272262	0.868149755832881	0.988028966944184	0.742311770943796	0.891662951404369	1	0.99898835989409	-1.76649283962603	-0.141391049441951	-0.0120432628946385	-0.297985947590053	-0.114667074978126	0	-0.00101215215913338	0.948537966003152
33	Terfenadine	1	9	28	252	0.16583912611718	0.863930885529158	0.987591097104589	0.735294117647059	0.88809946714032	1	0.998950931048694	-1.79673708030181	-0.146262506978252	-0.0124865362291556	-0.307484699747961	-0.118671529717499	0	-0.00104961960929052	0.962855299747353
33	Terfenadine	1	9	29	261	0.161041465766635	0.859752821063944	0.987153615199094	0.72840790842872	0.884564352056612	1	0.998913505007868	-1.82609339581277	-0.151110348414378	-0.0129296131594813	-0.316894073926888	-0.122660012735888	0	-0.00108708565569037	0.976674745447335
33	Terfenadine	1	9	30	270	0.15651358950328	0.855614973262032	0.986716520712388	0.721649484536082	0.881057268722467	1	0.998876081771295	-1.854612438885	-0.15593480162076	-0.0133724938595824	-0.326215736454024	-0.126632650933366	0	-0.00112455029843809	0.990026517624766
33	Terfenadine	1	9	31	279	0.152233363719234	0.851516764236296	0.986279813130071	0.715015321756895	0.877577885037297	1	0.998838661338661	-1.88234064785848	-0.160736091185593	-0.0138151785031956	-0.335451307487106	-0.130589569703602	0	-0.0011620135376391	1.00293826295966
33	Terfenadine	1	9	32	288	0.148181011535049	0.847457627118644	0.985843491938655	0.708502024291498	0.874125874125874	1	0.998801243709651	-1.90932070162302	-0.165514438477573	-0.0142576672638263	-0.344602362704463	-0.134530892957606	0	-0.00119947537339831	1.01543533948498
34	Terodiline	1	145	1	145	0.820987654320988	0.98078197481776	1	0.970677451971689	0.994762941854208	1	1	-0.19724720701063	-0.0194050920096881	0	-0.0297610471608302	-0.00525081960219579	0	0	0.10514833173655
34	Terodiline	1	145	2	290	0.696335078534031	0.962288686605982	1	0.943025540275049	0.989580451489816	1	1	-0.361924299824876	-0.0384407833074284	0	-0.058661912648586	-0.0104742120502484	0	0	0.190759601399809
34	Terodiline	1	145	3	435	0.604545454545454	0.944479897894065	1	0.916905444126075	0.984451680469523	1	1	-0.503278418130608	-0.05712087559786	0	-0.0867509264086549	-0.0156704623821678	0	0	0.262499960058243
34	Terodiline	1	145	4	580	0.534136546184739	0.927318295739348	1	0.892193308550186	0.979375797854372	1	1	-0.627103768242954	-0.0754584112515934	0	-0.114072456259848	-0.020839851215518	0	0	0.323911021514232
34	Terodiline	1	145	5	725	0.47841726618705	0.910769230769231	1	0.868778280542986	0.974351989754946	1	1	-0.737271985468883	-0.0934657280056771	0	-0.140667329489971	-0.0259826548383509	0	0	0.377352304727137
34	Terodiline	1	145	6	870	0.433224755700326	0.894800483675937	1	0.846560846560847	0.969379458896323	1	1	-0.836498619365443	-0.111154508825476	0	-0.166573199825815	-0.0310991452978141	0	0	0.424473160682841
34	Terodiline	1	145	7	1015	0.395833333333333	0.879382055852644	1	0.825451418744626	0.964457424196265	1	1	-0.92676203174145	-0.128535827432645	0	-0.191824868056782	-0.0361895904865054	0	0	0.466470613852635
34	Terodiline	1	145	8	1160	0.364383561643836	0.864485981308411	1	0.805369127516778	0.959585120356208	1	1	-1.00954822536074	-0.145620189943527	0	-0.216454563163413	-0.0412542542266385	0	0	0.504240001341101
34	Terodiline	1	145	9	1305	0.33756345177665	0.850086157380816	1	0.786240786240786	0.954761797464581	1	1	-1.08600178107618	-0.162417573010028	0	-0.240492189648823	-0.0462933963520883	0	0	0.538467795789493
34	Terodiline	1	145	10	1450	0.314420803782506	0.836158192090395	1	0.768	0.949986720612025	1	1	-1.15702305082452	-0.178937458809714	0	-0.263965545834465	-0.0513072727883799	0	0	0.56969133994824
34	Terodiline	1	145	11	1595	0.294247787610619	0.822679266259033	1	0.750586395621579	0.945259169518109	1	1	-1.22333305161048	-0.195188867192372	0	-0.286900517116961	-0.0562961356306828	0	0	0.598338700657895
34	Terodiline	1	145	12	1740	0.276507276507277	0.809628008752735	1	0.73394495412844	0.940578438169133	1	1	-1.28551814188401	-0.211180385255935	0	-0.309321247555262	-0.0612602332198681	0	0	0.624756082298631
34	Terodiline	1	145	13	1885	0.26078431372549	0.796984383414109	1	0.718025430067315	0.935943834466635	1	1	-1.34406159749662	-0.226920194594545	0	-0.331250292640061	-0.0661998102166867	0	0	0.649227182124297
34	Terodiline	1	145	14	2030	0.246753246753247	0.784729586426299	1	0.702781844802343	0.931354679886245	1	1	-1.39936644268724	-0.242416096435242	0	-0.352708755668853	-0.0711151076741277	0	0	0.671987168931099
34	Terodiline	1	145	15	2175	0.234154929577465	0.772845953002611	1	0.688172043010753	0.926810309146524	1	1	-1.4517722904994	-0.257675534856586	0	-0.373716409793584	-0.076006363108003	0	0	0.693232980484749
34	Terodiline	1	145	16	2320	0.222780569514238	0.761316872427984	1	0.674157303370786	0.92231006988745	1	1	-1.50156798517085	-0.272705618262224	0	-0.394291807510039	-0.080873810565816	0	0	0.713131042808369
34	Terodiline	1	145	17	2465	0.212460063897764	0.750126710593006	1	0.660701995870613	0.917853322358226	1	1	-1.54900124287834	-0.287513139264455	0	-0.414452379108401	-0.0857176806939637	0	0	0.731823147354764
34	Terodiline	1	145	18	2610	0.203053435114504	0.739260739260739	1	0.647773279352227	0.913439439114097	1	1	-1.5942861074135	-0.302104593117005	0	-0.43421452139415	-0.0905382008033168	0	0	0.749430988256684
34	Terodiline	1	145	19	2755	0.194444444444444	0.728705071393402	1	0.635340833884844	0.909067804721873	1	1	-1.6376087894008	-0.316486194822224	0	-0.453593677810858	-0.0953355949332264	0	0	0.766059709212822
34	Terodiline	1	145	20	2900	0.186535764375877	0.718446601941748	1	0.623376623376623	0.904737815473864	1	1	-1.67913229219254	-0.330663895025466	0	-0.472604410945793	-0.100110083914006	0	0	0.781800707727836
34	Terodiline	1	145	21	3045	0.179245283018868	0.7084729535663	1	0.611854684512428	0.900448879109957	1	1	-1.71900011494563	-0.344643394798405	0	-0.491260468271151	-0.104861885427925	0	0	0.796733875124652
34	Terodiline	1	145	22	3190	0.172503242542153	0.698772426817753	1	0.600750938673342	0.896200414547561	1	1	-1.75733924534158	-0.358430159403191	0	-0.509574841864338	-0.109591214068763	0	0	0.810929402740702
34	Terodiline	1	145	23	3335	0.16625	0.689333954354914	1	0.590043023970498	0.891991851619151	1	1	-1.79426259944617	-0.37202943112062	0	-0.527559822757156	-0.114298281399961	0	0	0.82444925091974
34	Terodiline	1	145	24	3480	0.16043425814234	0.680147058823529	1	0.579710144927536	0.887822630817186	1	1	-1.82987102691354	-0.385446241217673	0	-0.545227050483323	-0.118983296011408	0	0	0.837348353257506
34	Terodiline	1	145	25	3625	0.155011655011655	0.671201814058957	1	0.56973293768546	0.883692203046141	1	1	-1.86425497126621	-0.398685421122786	0	-0.56258755832458	-0.12364646357491	0	0	0.84967561106321
34	Terodiline	1	145	26	3770	0.149943630214205	0.662488809310654	1	0.560093348891482	0.879600029381425	1	1	-1.89749585408783	-0.411751612870985	0	-0.579651814695843	-0.128287986898365	0	0	0.861474720164858
34	Terodiline	1	145	27	3915	0.145196506550218	0.65399911621741	1	0.550774526678141	0.875545580834973	1	1	-1.92966723645238	-0.424649278875377	0	-0.596429761058139	-0.132908065978692	0	0	0.87278486266292
34	Terodiline	1	145	28	4060	0.140740740740741	0.645724258289703	1	0.54176072234763	0.871528338127288	1	1	-1.96083579927199	-0.437382711076469	0	-0.612930846703144	-0.137506898053536	0	0	0.883641289093571
34	Terodiline	1	145	29	4205	0.136550308008214	0.637656182679879	1	0.533037201554692	0.867547791465731	1	1	-1.99106217542078	-0.449956039516276	0	-0.629164060714074	-0.142084677651799	0	0	0.894075811051151
34	Terodiline	1	145	30	4350	0.132602193419741	0.629787234042553	1	0.524590163934426	0.863603440328857	1	1	-2.02040165974018	-0.462373240380044	0	-0.645137961373585	-0.146641596643008	0	0	0.904117220181599
34	Terodiline	1	145	31	4495	0.128875968992248	0.622110130306852	1	0.516406670252824	0.85969479325661	1	1	-2.04890481781975	-0.474638143544797	0	-0.660860703259562	-0.151177844285578	0	0	0.913791646266976
34	Terodiline	1	145	32	4640	0.125353440150801	0.614617940199336	1	0.508474576271186	0.855821367646191	1	1	-2.07661801039223	-0.486754439670551	0	-0.676340062243564	-0.15569360727397	0	0	0.92312286463944
35	Thioridazine	1	979	1	979	0.196882690730107	0.781424425094887	1	0.701433363830436	0.884538271022526	1	1	-1.62514720613928	-0.246636838729795	0	-0.354629374927407	-0.122689497779601	0	0	0.832035353968079
35	Thioridazine	1	979	2	1958	0.10919017288444	0.641260534994504	1	0.540159699389385	0.792979488263904	1	1	-2.21466421162158	-0.444319453790779	0	-0.615890443536184	-0.231957923679419	0	0	1.07874657120154
35	Thioridazine	1	979	3	2937	0.0755429650613787	0.543731551965201	1	0.439182738208898	0.718597298074159	1	1	-2.58305371092752	-0.609299624575111	0	-0.822839692362247	-0.33045416429565	0	0	1.21858054728272
35	Thioridazine	1	979	4	3916	0.0577478344562079	0.471952535059331	1	0.37001287001287	0.656972669936931	1	1	-2.85166942887713	-0.750876859768186	0	-0.994217490130242	-0.420112859632271	0	0	1.31540229700007
35	Thioridazine	1	979	5	4895	0.0467380720545278	0.416914830256105	1	0.319666435024322	0.605082694634933	1	1	-3.06319619902067	-0.874873322034136	0	-1.14047721740423	-0.502390144944889	0	0	1.38959385389108
35	Thioridazine	1	979	6	5874	0.0392541707556428	0.373373159803712	1	0.281379985319305	0.560789591745177	1	1	-3.23769757910879	-0.985176931005146	0	-1.26804926220698	-0.578409503089522	0	0	1.44997559430004
35	Thioridazine	1	979	7	6853	0.0338361765120541	0.338066260987153	1	0.251283732109691	0.522538842053926	1	1	-3.3862247378601	-1.08451336428861	0	-1.38117257146754	-0.649055959046979	0	0	1.50108432916538
35	Thioridazine	1	979	8	7832	0.0297324083250743	0.308859865866573	1	0.227003553099092	0.489172971562745	1	1	-3.51551763869145	-1.1748676134729	0	-1.48278960920432	-0.715039126976044	0	0	1.54553661347023
35	Thioridazine	1	979	9	8811	0.0265164070268479	0.28429859475266	1	0.2070020700207	0.459812396542211	1	1	-3.62999160448518	-1.25773020317011	0	-1.57502648566677	-0.776936706289629	0	0	1.58497088560953
35	Thioridazine	1	979	10	9790	0.0239282153539382	0.263355906696765	1	0.190239867659223	0.433776749566223	1	1	-3.73269695761399	-1.33424890422979	0	-1.6594695416916	-0.835225279152934	0	0	1.62047886268592
35	Thioridazine	1	979	11	10769	0.0218003451721319	0.245286985773355	1	0.175988981559415	0.410531501450545	1	1	-3.82582947572841	-1.40532638345307	0	-1.73733389067979	-0.890302613812168	0	0	1.65282415869012
35	Thioridazine	1	979	12	11748	0.02002002002002	0.229538300104932	1	0.16372437357631	0.389650872817955	1	1	-3.91102250509456	-1.47168537841648	0	-1.80957091395766	-0.942504138690058	0	0	1.68256207774824
35	Thioridazine	1	979	13	12727	0.0185085216318347	0.215689899550133	1	0.1530578292407	0.370791516290107	1	1	-3.98952402420689	-1.53391355306203	0	-1.87693946010849	-0.992115325028694	0	0	1.71010947829545
35	Thioridazine	1	979	14	13706	0.0172092356231177	0.203417412530513	1	0.143696113957266	0.353673488635292	1	1	-4.06230908443897	-1.59249519170379	0	-1.94005452900975	-1.03938113996134	0	0	1.73578765176948
35	Thioridazine	1	979	15	14685	0.0160804020100503	0.192466318394281	1	0.135413600235502	0.338066260987153	1	1	-4.13015401491881	-1.64783410994358	0	-1.99942147867744	-1.08451336428861	0	0	1.75984978456392
35	Thioridazine	1	979	16	15664	0.0150905432595573	0.182634105614694	1	0.128033845468715	0.32377827663616	1	1	-4.19368700555436	-1.70027055052551	0	-2.05546063229039	-1.12769632882128	0	0	1.7824991930883
35	Thioridazine	1	979	17	16643	0.0142154830302671	0.173757632924589	1	0.121416882225624	0.310649049413909	1	1	-4.2534235541352	-1.75009386500092	0	-2.10852534721104	-1.16909146246775	0	0	1.80390181334787
35	Thioridazine	1	979	18	17622	0.0134363453140746	0.165704005302528	1	0.115450255998394	0.29854310962503	1	1	-4.30979190690184	-1.79755218282891	0	-2.15891552578787	-1.2088409357228	0	0	1.82419498847682
35	Thioridazine	1	979	19	18601	0.01273817737912	0.158363874937786	1	0.110042581694656	0.287345312440136	1	1	-4.36315170193601	-1.84285988787342	0	-2.20688788178099	-1.24707060722866	0	0	1.84349379874794
35	Thioridazine	1	979	20	19580	0.012108980827447	0.151646447140381	1	0.105118829981718	0.276957163958641	1	1	-4.41380788454199	-1.88620347314453	0	-2.25266385461868	-1.28389242750181	0	0	1.86189571689705
35	Thioridazine	1	979	21	20559	0.0115390162988605	0.145475705557172	1	0.100616824882978	0.267293916390463	1	1	-4.46202126426861	-1.92774617842764	0	-2.29643578994281	-1.31940641557826	0	0	1.87948409542443
35	Thioridazine	1	979	22	21538	0.0110202957112683	0.139787522965093	1	0.0964846044131219	0.258282250843722	1	1	-4.50801664156401	-1.9676317023421	0	-2.33837182312541	-1.35370229651923	0	0	1.89633082220668
35	Thioridazine	1	979	23	22517	0.0105462055631234	0.134527424376369	1	0.092678405931418	0.249858413565646	1	1	-4.55198914601723	-2.00598720201569	0	-2.37861977927004	-1.38686086729163	0	0	1.91249837280443
35	Thioridazine	1	979	24	23496	0.0101112234580384	0.129648836864721	1	0.0891611102496511	0.24196670538134	1	1	-4.59410923862867	-2.04292573838579	0	-2.41731031821303	-1.41895514335944	0	0	1.92804141774795
35	Thioridazine	1	979	25	24475	0.00971070200283229	0.125111706881144	1	0.0859010270774977	0.234558248631744	1	1	-4.63452670239907	-2.07854828570262	0	-2.45455949339871	-1.45005132692264	0	0	1.94300809654136
35	Thioridazine	1	979	26	25454	0.00934070210944189	0.120881398079713	1	0.0828709375225193	0.227589973903016	1	1	-4.67337385724956	-2.11294539523648	0	-2.49047085101371	-1.48020962909297	0	0	1.95744103860438
35	Thioridazine	1	979	27	26433	0.00899786300753571	0.116927805432132	1	0.0800473323356419	0.22102378215896	1	1	-4.71076817344726	-2.14619858222521	0	-2.52513716507107	-1.50948497167509	0	0	1.97137818962904
35	Thioridazine	1	979	28	27412	0.0086792998698105	0.113224637681159	1	0.0774098007539041	0.214825847846013	1	1	-4.74681441372316	-2.17838148953474	0	-2.55864188167525	-1.5379275891084	0	0	1.98485348658157
35	Thioridazine	1	979	29	28391	0.00838252244071112	0.10974883195886	1	0.0749405363135773	0.208966036053607	1	1	-4.78160640253697	-2.20956086982736	0	-2.59106032906925	-1.56558354714355	0	0	1.99789741372172
35	Thioridazine	1	979	30	29370	0.00810536980749747	0.106480073014907	1	0.0726239343227029	0.203417412530513	1	1	-4.81522849775365	-2.23979741918076	0	-2.62246073761544	-1.59249519170379	0	0	2.01053746417081
35	Thioridazine	1	979	31	30349	0.00784595769721142	0.103400395875801	1	0.0704462617538056	0.198155829744511	1	1	-4.84775682284691	-2.26914648832905	0	-2.65290510444693	-1.61870153891292	0	0	2.02279852582235
35	Thioridazine	1	979	32	31328	0.00760263558033452	0.100493855518548	1	0.0683953847983823	0.193159575564026	1	1	-4.8792603049204	-2.297658692471	0	-2.68244993033795	-1.64423861530772	0	0	2.03470320614127
36	Vandetanib	1	110	1	110	0.784313725490196	1	1	1	1	1	1	-0.242946178610389	0	0	0	0	0	0	0.149655297368175
36	Vandetanib	1	110	2	220	0.645161290322581	1	1	1	1	1	1	-0.438254930931155	0	0	0	0	0	0	0.269965851641373
36	Vandetanib	1	110	3	330	0.547945205479452	1	1	1	1	1	1	-0.601579987034455	0	0	0	0	0	0	0.370574389625465
36	Vandetanib	1	110	4	440	0.476190476190476	1	1	1	1	1	1	-0.741937344729377	0	0	0	0	0	0	0.457034782720722
36	Vandetanib	1	110	5	550	0.421052631578947	1	1	1	1	1	1	-0.864997437486605	0	0	0	0	0	0	0.532840028479588
36	Vandetanib	1	110	6	660	0.377358490566038	1	1	1	1	1	1	-0.974559639998131	0	0	0	0	0	0	0.600330548770792
36	Vandetanib	1	110	7	770	0.341880341880342	1	1	1	1	1	1	-1.07329448068382	0	0	0	0	0	0	0.661151394062261
36	Vandetanib	1	110	8	880	0.3125	1	1	1	1	1	1	-1.16315080980568	0	0	0	0	0	0	0.716503059735959
36	Vandetanib	1	110	9	990	0.287769784172662	1	1	1	1	1	1	-1.24559447901676	0	0	0	0	0	0	0.767288513133409
36	Vandetanib	1	110	10	1100	0.266666666666667	1	1	1	1	1	1	-1.32175583998232	0	0	0	0	0	0	0.814204052980386
36	Vandetanib	1	110	11	1210	0.248447204968944	1	1	1	1	1	1	-1.39252491087053	0	0	0	0	0	0	0.857797932121942
36	Vandetanib	1	110	12	1320	0.232558139534884	1	1	1	1	1	1	-1.45861502269952	0	0	0	0	0	0	0.898509563790474
36	Vandetanib	1	110	13	1430	0.218579234972678	1	1	1	1	1	1	-1.52060669872748	0	0	0	0	0	0	0.936696551391522
36	Vandetanib	1	110	14	1540	0.206185567010309	1	1	1	1	1	1	-1.57897870494939	0	0	0	0	0	0	0.972653815667433
36	Vandetanib	1	110	15	1650	0.195121951219512	1	1	1	1	1	1	-1.63413052502447	0	0	0	0	0	0	1.00662743929445
36	Vandetanib	1	110	16	1760	0.185185185185185	1	1	1	1	1	1	-1.68639895357023	0	0	0	0	0	0	1.03882488838266
36	Vandetanib	1	110	17	1870	0.176211453744493	1	1	1	1	1	1	-1.73607056336747	0	0	0	0	0	0	1.06942269229742
36	Vandetanib	1	110	18	1980	0.168067226890756	1	1	1	1	1	1	-1.78339121955754	0	0	0	0	0	0	1.09857230442258
36	Vandetanib	1	110	19	2090	0.160642570281124	1	1	1	1	1	1	-1.82857344235077	0	0	0	0	0	0	1.12640463760252
36	Vandetanib	1	110	20	2200	0.153846153846154	1	1	1	1	1	1	-1.87180217690159	0	0	0	0	0	0	1.15303361839595
36	Vandetanib	1	110	21	2310	0.14760147601476	1	1	1	1	1	1	-1.91323936676576	0	0	0	0	0	0	1.17855900433408
36	Vandetanib	1	110	22	2420	0.141843971631206	1	1	1	1	1	1	-1.95302761682418	0	0	0	0	0	0	1.20306864028847
36	Vandetanib	1	110	23	2530	0.136518771331058	1	1	1	1	1	1	-1.99129315490313	0	0	0	0	0	0	1.22664028283462
36	Vandetanib	1	110	24	2640	0.131578947368421	1	1	1	1	1	1	-2.02814824729229	0	0	0	0	0	0	1.24934308821555
36	Vandetanib	1	110	25	2750	0.126984126984127	1	1	1	1	1	1	-2.0636931847117	0	0	0	0	0	0	1.27123883570111
36	Vandetanib	1	110	26	2860	0.122699386503067	1	1	1	1	1	1	-2.09801792725277	0	0	0	0	0	0	1.29238294087474
36	Vandetanib	1	110	27	2970	0.118694362017804	1	1	1	1	1	1	-2.13120347623843	0	0	0	0	0	0	1.31282530070185
36	Vandetanib	1	110	28	3080	0.114942528735632	1	1	1	1	1	1	-2.16332302566054	0	0	0	0	0	0	1.33261100281741
36	Vandetanib	1	110	29	3190	0.11142061281337	1	1	1	1	1	1	-2.19444293437434	0	0	0	0	0	0	1.35178092439952
36	Vandetanib	1	110	30	3300	0.108108108108108	1	1	1	1	1	1	-2.22462355152433	0	0	0	0	0	0	1.37037224063331
36	Vandetanib	1	110	31	3410	0.10498687664042	1	1	1	1	1	1	-2.25391992101276	0	0	0	0	0	0	1.38841885866483
36	Vandetanib	1	110	32	3520	0.102040816326531	1	1	1	1	1	1	-2.28238238567653	0	0	0	0	0	0	1.40595178977513
37	Pimozide	1	0.64	1	0.64	0.841584158415842	0.999148528550902	1	0.99687255668491	0.999936004095738	1	1	-0.172469260350943	-0.000851834156817137	0	-0.00313234398631622	-6.3997952087454e-05	0	0	0.104309851772539
37	Pimozide	1	0.64	2	1.28	0.726495726495726	0.998298505875472	1	0.993764614185503	0.999872016381903	1	1	-0.31952267830744	-0.00170294330974275	0	-0.00625490702310998	-0.000127991808698839	0	0	0.19296961288634
37	Pimozide	1	0.64	3	1.92	0.639097744360902	0.997449928279233	1	0.990675990675991	0.999808036856924	1	1	-0.447697871731437	-0.0025533286918426	0	-0.00936775000360027	-0.000191981570358884	0	0	0.270006430006102
37	Pimozide	1	0.64	4	2.56	0.570469798657718	0.996602792080259	1	0.987606506584043	0.999744065519227	1	1	-0.561295049455143	-0.00340299153303876	0	-0.0124709332541159	-0.0002559672375914	0	0	0.338069202032103
37	Pimozide	1	0.64	5	3.2	0.515151515151515	0.995757093609122	1	0.984555984555985	0.999680102367242	1	1	-0.663294217410264	-0.0042519330601219	0	-0.0155645165411116	-0.000319948810920166	0	0	0.398993580775403
37	Pimozide	1	0.64	6	3.84	0.469613259668508	0.994912829208839	1	0.981524249422633	0.999616147399399	1	1	-0.755845774775509	-0.0051001544967602	0	-0.018648559078073	-0.000383926290868929	0	0	0.454104179091818
37	Pimozide	1	0.64	7	4.48	0.431472081218274	0.994069995234818	1	0.978511128165771	0.999552200614125	1	1	-0.840552472247672	-0.00594765706351053	0	-0.0217231195323187	-0.000447899677961739	0	0	0.50438825769647
37	Pimozide	1	0.64	8	5.12	0.39906103286385	0.993228588054806	1	0.975516449885233	0.999488262009851	1	1	-0.918640909219109	-0.00679444197782974	0	-0.0247882560316954	-0.000511868972722168	0	0	0.550601367739536
37	Pimozide	1	0.64	9	5.76	0.37117903930131	0.99238860404884	1	0.97254004576659	0.999424331585007	1	1	-0.991070747063923	-0.00764051045408387	0	-0.0278440261711733	-0.000575834175673424	0	0	0.593334626389302
37	Pimozide	1	0.64	10	6.4	0.346938775510204	0.991550039609189	1	0.96958174904943	0.999360409338024	1	1	-1.05860695405441	-0.00848586370355985	0	-0.0308904870193383	-0.000639795287339351	0	0	0.633059219830859
37	Pimozide	1	0.64	11	7.04	0.325670498084291	0.990712891140309	1	0.966641394996209	0.999296495267332	1	1	-1.12186915083238	-0.00933050293447444	0	-0.0339276951247881	-0.000703752308243204	0	0	0.670156800164099
37	Pimozide	1	0.64	12	7.68	0.306859205776173	0.989877155058786	1	0.963718820861678	0.999232589371363	1	1	-1.18136624969702	-0.0101744293519868	0	-0.0369557065224291	-0.000767705238908095	0	0	0.704940823265471
37	Pimozide	1	0.64	13	8.32	0.290102389078498	0.989042827793289	1	0.960813865862849	0.999168691648548	1	1	-1.23752135252675	-0.0110176441582063	0	-0.039974576739681	-0.000831654079856993	0	0	0.737671885950189
37	Pimozide	1	0.64	14	8.96	0.275080906148867	0.988209905784515	1	0.957926371149512	0.999104802097321	1	1	-1.29069002040743	-0.0118601485522045	0	-0.0429843608025851	-0.00089559883161339	0	0	0.768568980093363
37	Pimozide	1	0.64	15	9.6	0.261538461538462	0.987378385485143	1	0.955056179775281	0.999040920716113	1	1	-1.34117392583942	-0.0127019437300246	0	-0.0459851132418234	-0.000959539494699857	0	0	0.797817902411127
37	Pimozide	1	0.64	16	10.24	0.249266862170088	0.986548263359781	1	0.952203136669156	0.998977047503357	1	1	-1.3892312207932	-0.013543030884692	0	-0.0489768880986461	-0.00102347606963915	0	0	0.82557764119845
37	Pimozide	1	0.64	17	10.88	0.238095238095238	0.985719535884916	1	0.949367088607595	0.998913182457486	1	1	-1.43508452528932	-0.0143834112062242	0	-0.051959738930711	-0.00108740855695446	0	0	0.851985297305595
37	Pimozide	1	0.64	18	11.52	0.227882037533512	0.984892199548864	1	0.946547884187082	0.998849325576935	1	1	-1.4789271631535	-0.015223085881641	0	-0.0549337188178374	-0.00115133695716812	0	0	0.877159925371223
37	Pimozide	1	0.64	19	12.16	0.218508997429306	0.984066250851722	1	0.943745373797187	0.998785476860138	1	1	-1.52092808712813	-0.0160620560949752	0	-0.0578988803676723	-0.0012152612708026	0	0	0.901205567696706
37	Pimozide	1	0.64	20	12.8	0.209876543209877	0.983241686305315	1	0.940959409594096	0.998721636305529	1	1	-1.56123581061622	-0.0169003230272811	0	-0.0608552757212747	-0.00127918149838017	0	0	0.924213676204194
37	Pimozide	1	0.64	21	13.44	0.201900237529691	0.982418502433154	1	0.938189845474614	0.998657803911543	1	1	-1.59998157719206	-0.0177378878566458	0	-0.0638029565586172	-0.00134309764042367	0	0	0.946265064857638
37	Pimozide	1	0.64	22	14.08	0.194508009153318	0.981596695770377	1	0.935436537050624	0.998593979676615	1	1	-1.63728193860527	-0.0185747517581986	0	-0.0667419741040061	-0.0014070096974551	0	0	0.967431497714677
37	Pimozide	1	0.64	23	14.72	0.187637969094923	0.98077626286371	1	0.932699341623994	0.998530163599182	1	1	-1.67324086899272	-0.0194109159041212	0	-0.0696723791314232	-0.00147091766999621	0	0	0.987776991281778
37	Pimozide	1	0.64	24	15.36	0.181236673773987	0.979957200271413	1	0.929978118161926	0.998466355677679	1	1	-1.70795151195596	-0.0202463814636568	0	-0.0725942219697878	-0.00153482155856972	0	0	1.00735889071389
37	Pimozide	1	0.64	25	16	0.175257731958763	0.979139504563233	1	0.927272727272727	0.998402555910543	1	1	-1.74149763444717	-0.0210811496031214	0	-0.0755075525081451	-0.0015987213636971	0	0	1.02622876540762
37	Pimozide	1	0.64	26	16.64	0.169660678642715	0.978323172320359	1	0.924583031182016	0.998338764296211	1	1	-1.77395484459455	-0.0219152214859117	0	-0.0784124202007752	-0.00166261708590023	0	0	1.04443315918077
37	Pimozide	1	0.64	27	17.28	0.164410058027079	0.977508200135367	1	0.921908893709327	0.99827498083312	1	1	-1.80539161801811	-0.0227485982725165	0	-0.0813088740722318	-0.00172650872570082	0	0	1.06201422248161
37	Pimozide	1	0.64	28	17.92	0.159474671669794	0.976694584612183	1	0.919250180245133	0.998211205519709	1	1	-1.83587016767553	-0.0235812811205249	0	-0.0841969627223051	-0.00179039628362069	0	0	1.07901024821242
37	Pimozide	1	0.64	29	18.56	0.154826958105647	0.975882322366027	1	0.916606757728253	0.998147438354414	1	1	-1.86544718501921	-0.0244132711846371	0	-0.0870767343309165	-0.00185427976018129	0	0	1.0954561282806
37	Pimozide	1	0.64	30	19.2	0.150442477876106	0.97507141002337	1	0.913978494623656	0.998083679335676	1	1	-1.89417447465612	-0.0252445696166738	0	-0.0899482366629396	-0.00191815915590378	0	0	1.11138374454721
37	Pimozide	1	0.64	31	19.84	0.146299483648881	0.974261844221888	1	0.911365260900643	0.998019928461932	1	1	-1.92209950036159	-0.026075177565585	0	-0.0928115170729546	-0.00198203447130989	0	0	1.12682230516962
37	Pimozide	1	0.64	32	20.48	0.142378559463987	0.973453621610411	1	0.908766928011404	0.997956185731622	1	1	-1.94926585690229	-0.0269050961774608	0	-0.0956666225099344	-0.00204590570692072	0	0	1.14179863524232
38	Clozapine	2	70.8	1	70.8	0.958591648145982	0.995333139979434	1	0.9807126511932	1	1	1	-0.0422901048483038	-0.00467778381157794	0	-0.0194757765006567	0	0	0	0.0138701781890617
38	Clozapine	2	70.8	2	141.6	0.920476243962709	0.99070963678354	1	0.96215522771007	1	1	1	-0.0828640863957411	-0.00933378780352549	0	-0.0385794819674752	0	0	0	0.0269159231409998
38	Clozapine	2	70.8	3	212.4	0.885276007345792	0.986128889004989	1	0.944287063267233	1	1	1	-0.121855809889281	-0.0139682138504978	0	-0.0573250666192693	0	0	0	0.0392109713043579
38	Clozapine	2	70.8	4	283.2	0.852668816980543	0.98159030630818	1	0.927070457354759	1	1	1	-0.159384063645354	-0.0185812610333617	0	-0.0757257105281355	0	0	0	0.0508202533781811
38	Clozapine	2	70.8	5	354	0.822378324134471	0.977093309175618	1	0.910470409711684	1	1	1	-0.195554741468965	-0.0231731256905136	0	-0.0937938792863609	0	0	0	0.0618012038708614
38	Clozapine	2	70.8	6	424.8	0.794166101366412	0.972637328661239	1	0.894454382826476	1	1	1	-0.230462643937784	-0.0277440014680192	0	-0.111541374732907	0	0	0	0.0722048389689587
38	Clozapine	2	70.8	7	495.6	0.767825353696243	0.968221806150453	1	0.878992089071198	1	1	1	-0.264192975736035	-0.0322940793686177	0	-0.12897938125646	0	0	0	0.0820766499386482
38	Clozapine	2	70.8	8	566.4	0.743175841117258	0.963846193126692	1	0.86405529953917	1	1	1	-0.296822598580748	-0.0368235477996108	0	-0.146118508129994	0	0	0	0.0914573484535982
38	Clozapine	2	70.8	9	637.2	0.72005974870398	0.959509950944259	1	0.849617672047579	1	1	1	-0.32842108610396	-0.0413325926196776	0	-0.16296882827814	0	0	0	0.100383492158345
38	Clozapine	2	70.8	10	708	0.698338304218151	0.955212550607287	1	0.835654596100278	1	1	1	-0.359051617107194	-0.0458213971846333	0	-0.179539913832078	0	0	0	0.108888012677859
38	Clozapine	2	70.8	11	778.8	0.677888989990901	0.950953472554601	1	0.822143052891203	1	1	1	-0.388771736024062	-0.0502901423921706	0	-0.195840868786201	0	0	0	0.117000663639673
38	Clozapine	2	70.8	12	849.6	0.658603230732139	0.946732206450319	1	0.809061488673139	1	1	1	-0.417634003597701	-0.0547390067256013	0	-0.211880359035499	0	0	0	0.12474840270632
38	Clozapine	2	70.8	13	920.4	0.64038446510901	0.942548250980001	1	0.796389700026546	1	1	1	-0.445686556259666	-0.0591681662966332	0	-0.227666640041794	0	0	0	0.132155718850651
38	Clozapine	2	70.8	14	991.2	0.623146528781081	0.938401113652182	1	0.784108729743858	1	1	1	-0.472973589164035	-0.0635777948872003	0	-0.243207582349951	0	0	0	0.139244913947321
38	Clozapine	2	70.8	15	1062	0.606812291743799	0.934290310605123	1	0.772200772200772	1	1	1	-0.499535775048786	-0.0679680639903772	0	-0.258510695151501	0	0	0	0.146036346054923
38	Clozapine	2	70.8	16	1132.8	0.591312504509705	0.930215366418609	1	0.760649087221095	1	1	1	-0.525410628890872	-0.0723391428503989	0	-0.273583148072279	0	0	0	0.152548640417701
38	Clozapine	2	70.8	17	1203.6	0.57658481671709	0.926175813930666	1	0.749437921558831	1	1	1	-0.550632826561082	-0.0766911985018081	0	-0.288431791342327	0	0	0	0.158798873142808
38	Clozapine	2	70.8	18	1274.4	0.562572938834352	0.922171194059019	1	0.738552437223043	1	1	1	-0.575234484271018	-0.081024395807757	0	-0.303063174490083	0	0	0	0.164802731648381
38	Clozapine	2	70.8	19	1345.2	0.549225923195496	0.918201055627174	1	0.727978645959718	1	1	1	-0.599245404462491	-0.0853388974974803	0	-0.317483563688571	0	0	0	0.170574655283153
38	Clozapine	2	70.8	20	1416	0.536497545008183	0.914264955194962	1	0.717703349282297	1	1	1	-0.622693292861866	-0.0896348642029652	0	-0.331698957868555	0	0	0	0.176127958954789
38	Clozapine	2	70.8	21	1486.8	0.524345767483524	0.910362456893433	1	0.707714083510262	1	1	1	-0.645603950664263	-0.0939124544948353	0	-0.34571510370239	0	0	0	0.181474942144467
38	Clozapine	2	70.8	22	1557.6	0.512732278045423	0.906493132263952	1	0.697999069334574	1	1	1	-0.668001445190723	-0.0981718249174728	0	-0.359537509552209	0	0	0	0.186626985308479
38	Clozapine	2	70.8	23	1628.4	0.501622084838098	0.902656560101384	1	0.688547165480835	1	1	1	-0.689908261848579	-0.102413130023392	0	-0.373171458467195	0	0	0	0.19159463535731
38	Clozapine	2	70.8	24	1699.2	0.490983164579714	0.898852326301252	1	0.679347826086957	1	1	1	-0.711345439800487	-0.106636522406893	0	-0.386622020306684	0	0	0	0.196387681645944
38	Clozapine	2	70.8	25	1770	0.480786154297448	0.895080023710729	1	0.670391061452514	1	1	1	-0.732332693394073	-0.110842152736998	0	-0.399894063058709	0	0	0	0.201015223695863
38	Clozapine	2	70.8	26	1840.8	0.471004080694293	0.891339251983377	1	0.661667401852669	1	1	1	-0.752888521108786	-0.115030169789712	0	-0.412992263417228	0	0	0	0.205485731691275
38	Clozapine	2	70.8	27	1911.6	0.461612121894891	0.887629617437513	1	0.653167864141084	1	1	1	-0.773030303528867	-0.119200720479594	0	-0.425921116675547	0	0	0	0.209807100643057
38	Clozapine	2	70.8	28	1982.4	0.452587397139228	0.883950732918091	1	0.644883920894239	1	1	1	-0.792774391642713	-0.123353949890688	0	-0.438684945988308	0	0	0	0.213986698988673
38	Clozapine	2	70.8	29	2053.2	0.44390878067277	0.880302217662011	1	0.636807471874337	1	1	1	-0.812136186592639	-0.127490001306805	0	-0.451287911049794	0	0	0	0.218031412290561
38	Clozapine	2	70.8	30	2124	0.435556736646293	0.876683697166744	1	0.628930817610063	1	1	1	-0.831130211849607	-0.131609016241183	0	-0.46373401623214	0	0	0	0.221947682606062
38	Clozapine	2	70.8	31	2194.8	0.427513172309458	0.873094803062192	1	0.621246634914061	1	1	1	-0.84977017866023	-0.135711134465541	0	-0.476027118223295	0	0	0	0.22574154402595
38	Clozapine	2	70.8	32	2265.6	0.419761307176151	0.869535172985673	1	0.613747954173486	1	1	1	-0.868069045504872	-0.139796494038537	0	-0.488170933201184	0	0	0	0.229418654813836
39	Desipramine	2	108	1	108	0.927903871829105	0.933660933660934	1	0.940561364887177	1	1	1	-0.0748271379524274	-0.0686419327221635	0	-0.0612783852805803	0	0	0	0.00776872430591662
39	Desipramine	2	108	2	216	0.865504358655043	0.875576036866359	1	0.887792207792208	1	1	1	-0.14444286838197	-0.132873281379973	0	-0.119017563606294	0	0	0	0.0145407144899131
39	Desipramine	2	108	3	324	0.810968494749125	0.824295010845987	1	0.840629611411707	1	1	1	-0.209526073032988	-0.193226790276217	0	-0.173604130512756	0	0	0	0.0204923771010778
39	Desipramine	2	108	4	432	0.762897914379802	0.778688524590164	1	0.798225128444652	1	1	1	-0.270631051695166	-0.250144153132716	0	-0.225364605474092	0	0	0	0.0257609489433094
39	Desipramine	2	108	5	540	0.72020725388601	0.737864077669903	1	0.759893285904847	1	1	1	-0.328216255774194	-0.303995647943305	0	-0.274577268843725	0	0	0	0.0304547939093318
39	Desipramine	2	108	6	648	0.682041216879293	0.701107011070111	1	0.725074246924056	1	1	1	-0.382665187657933	-0.355094748719215	0	-0.32148121982054	0	0	0	0.0346606119657321
39	Desipramine	2	108	7	756	0.647716682199441	0.667838312829525	1	0.693306288032454	1	1	1	-0.434301897065906	-0.4037091814059	0	-0.3662834033612	0	0	0	0.0384485901381465
39	Desipramine	2	108	8	864	0.616681455190772	0.63758389261745	1	0.664205207928488	1	1	1	-0.483402668474984	-0.450069414344918	0	-0.409164129166153	0	0	0	0.0418761502845934
39	Desipramine	2	108	9	972	0.58848433530906	0.609951845906902	1	0.637448713166729	1	1	1	-0.53020497063257	-0.494375266067022	0	-0.450281455120368	0	0	0	0.0449907205061323
39	Desipramine	2	108	10	1080	0.562753036437247	0.584615384615385	1	0.612764431695948	1	1	1	-0.574914403497286	-0.536801110169251	0	-0.489774704511898	0	0	0	0.0478318147246873
39	Desipramine	2	108	11	1188	0.539177657098526	0.561299852289513	1	0.589920607525026	1	1	1	-0.617710157374395	-0.577500020191844	0	-0.527767314653759	0	0	0	0.0504326139260342
39	Desipramine	2	108	12	1296	0.517498138495905	0.539772727272727	1	0.568718801996672	1	1	1	-0.658749350958446	-0.616607103437611	0	-0.564369163853717	0	0	0	0.0528211830609375
39	Desipramine	2	108	13	1404	0.497494631352899	0.51983584131327	1	0.548988114359139	1	1	1	-0.69817051369217	-0.654242207029347	0	-0.599678487326017	0	0	0	0.055021417928812
39	Desipramine	2	108	14	1512	0.478980013783598	0.50131926121372	1	0.530580565041912	1	1	1	-0.736096407319396	-0.69051213292194	0	-0.633783466215608	0	0	0	0.0570537894467393
39	Desipramine	2	108	15	1620	0.461794019933555	0.484076433121019	1	0.513367377590868	1	1	1	-0.772636331618184	-0.725512465061977	0	-0.666763554459434	0	0	0	0.0589359341353559
39	Desipramine	2	108	16	1728	0.445798588838999	0.467980295566502	1	0.497235961594414	1	1	1	-0.807888023492984	-0.759329087441246	0	-0.698690593734243	0	0	0	0.0606831266487827
39	Desipramine	2	108	17	1836	0.430874147551147	0.452920143027414	1	0.482087447108604	1	1	1	-0.841939232560417	-0.792039453746775	0	-0.729629755850637	0	0	0	0.0623086609431682
39	Desipramine	2	108	18	1944	0.416916616676665	0.438799076212471	1	0.467834656446756	1	1	1	-0.874869037186002	-0.823713655842004	0	-0.759640343679692	0	0	0	0.0638241600395682
39	Desipramine	2	108	19	2052	0.403834979662987	0.425531914893617	1	0.454400425418772	1	1	1	-0.906748950646747	-0.854415328156068	0	-0.788776475354745	0	0	0	0.0652398295063922
39	Desipramine	2	108	20	2160	0.391549295774648	0.41304347826087	1	0.441716205737917	1	1	1	-0.937643856344724	-0.884202417322655	0	-0.817087671584922	0	0	0	0.0665646662331272
39	Desipramine	2	108	21	2268	0.379989065062876	0.401267159450898	1	0.429720895147096	1	1	1	-0.967612802826074	-0.913127840465647	0	-0.8446193620921	0	0	0	0.0678066314260272
39	Desipramine	2	108	22	2376	0.369091874668083	0.390143737166324	1	0.418359853121175	1	1	1	-0.99670968309236	-0.941240050922104	0	-0.871413324178512	0	0	0	0.0689727947747598
39	Desipramine	2	108	23	2484	0.358802271553949	0.37962037962038	1	0.407584068685905	1	1	1	-1.0249838178422	-0.968583526594789	0	-0.897508064055172	0	0	0	0.0700694552386441
39	Desipramine	2	108	24	2592	0.349070818684078	0.369649805447471	1	0.397349453615438	1	1	1	-1.0524804584994	-0.995199193294679	0	-0.922939149668145	0	0	0	0.0711022427555922
39	Desipramine	2	108	25	2700	0.339853300733496	0.360189573459716	1	0.387616239510093	1	1	1	-1.07924122291211	-1.02112479318974	0	-0.947739502242347	0	0	0	0.0720762042953175
39	Desipramine	2	108	26	2808	0.331110052405908	0.351201478743068	1	0.378348461368165	1	1	1	-1.10530447425584	-1.046395206686	0	-0.971939652539013	0	0	0	0.0729958769948974
39	Desipramine	2	108	27	2916	0.322805387830934	0.342651036970243	1	0.369513513513514	1	1	1	-1.13070565179957	-1.07104273462994	0	-0.995567966830935	0	0	0	0.0738653505811134
39	Desipramine	2	108	28	3024	0.314907113729044	0.334507042253521	1	0.361081766321572	1	1	1	-1.15547756069194	-1.09509734656067	0	-1.01865084679066	0	0	0	0.0746883208645546
39	Desipramine	2	108	29	3132	0.307386112339673	0.326741186586414	1	0.353026234249122	1	1	1	-1.17965062671318	-1.11858689979823	0	-1.0412129068241	0	0	0	0.0754681357586784
39	Desipramine	2	108	30	3240	0.300215982721382	0.319327731092437	1	0.345322287330774	1	1	1	-1.20325312095554	-1.14153733338514	0	-1.0632771318363	0	0	0	0.0762078350130419
39	Desipramine	2	108	31	3348	0.293372731110173	0.312243221035333	1	0.337947399644058	1	1	1	-1.22631135859399	-1.1639728402671	0	-1.08486501796439	0	0	0	0.0769101846386542
39	Desipramine	2	108	32	3456	0.286834502682625	0.305466237942122	1	0.330880929332043	1	1	1	-1.24884987525173	-1.18591602057869	0	-1.10599669843815	0	0	0	0.0775777068334243
40	Dolasetron	2	360	1	360	0.942947702060222	0.990615224191867	1	1	1	1	1	-0.0587444569955834	-0.00942909028885169	0	0	0	0	0	0.0361866946444329
40	Dolasetron	2	360	2	720	0.892053973013493	0.981404958677686	1	1	1	1	1	-0.114228640369994	-0.0187701026819905	0	0	0	0	0	0.0703650546813035
40	Dolasetron	2	360	3	1080	0.846372688477952	0.972364380757421	1	1	1	1	1	-0.166795486265035	-0.0280246674481962	0	0	0	0	0	0.102746329411068
40	Dolasetron	2	360	4	1440	0.805142083897158	0.963488843813388	1	1	1	1	1	-0.216736515402572	-0.0371943700080488	0	0	0	0	0	0.13351009613998
40	Dolasetron	2	360	5	1800	0.767741935483871	0.954773869346734	1	1	1	1	1	-0.264301623807717	-0.0462807525640062	0	0	0	0	0	0.162810291283766
40	Dolasetron	2	360	6	2160	0.733662145499383	0.946215139442231	1	1	1	1	1	-0.309706648569783	-0.0552853156570879	0	0	0	0	0	0.190779870890423
40	Dolasetron	2	360	7	2520	0.702479338842975	0.937808489634748	1	1	1	1	1	-0.353139289106425	-0.0642095196540967	0	0	0	0	0	0.217534458149933
40	Dolasetron	2	360	8	2880	0.673839184597961	0.929549902152642	1	1	1	1	1	-0.39476379505833	-0.0730547861690633	0	0	0	0	0	0.243175231146102
40	Dolasetron	2	360	9	3240	0.647442872687704	0.921435499515034	1	1	1	1	1	-0.434724716810057	-0.0818224994223735	0	0	0	0	0	0.267791233184363
40	Dolasetron	2	360	10	3600	0.62303664921466	0.913461538461538	1	1	1	1	1	-0.473149934935101	-0.0905140075408319	0	0	0	0	0	0.291461238935565
40	Dolasetron	2	360	11	3960	0.600403632694248	0.905624404194471	1	1	1	1	1	-0.510153128784358	-0.0991306238017107	0	0	0	0	0	0.314255275091053
40	Dolasetron	2	360	12	4320	0.57935735150925	0.897920604914934	1	1	1	1	1	-0.545835804382929	-0.107673627823658	0	0	0	0	0	0.336235869550865
40	Dolasetron	2	360	13	4680	0.559736594543744	0.890346766635426	1	1	1	1	1	-0.580288972796318	-0.116144266707167	0	0	0	0	0	0.357459085300434
40	Dolasetron	2	360	14	5040	0.54140127388535	0.882899628252788	1	1	1	1	1	-0.613594548857992	-0.124543756127143	0	0	0	0	0	0.377975382029355
40	Dolasetron	2	360	15	5400	0.524229074889868	0.875576036866359	1	1	1	1	1	-0.645826524369873	-0.132873281379973	0	0	0	0	0	0.397830338825074
40	Dolasetron	2	360	16	5760	0.508112724167378	0.868372943327239	1	1	1	1	1	-0.677051958052088	-0.14113399838734	0	0	0	0	0	0.41706526398377
40	Dolasetron	2	360	17	6120	0.492957746478873	0.86128739800544	1	1	1	1	1	-0.707331815551902	-0.149327034658916	0	0	0	0	0	0.435717712457421
40	Dolasetron	2	360	18	6480	0.478680611423974	0.85431654676259	1	1	1	1	1	-0.736721685965081	-0.157453490215941	0	0	0	0	0	0.453821927232291
40	Dolasetron	2	360	19	6840	0.465207193119625	0.847457627118644	1	1	1	1	1	-0.765272396033213	-0.165514438477573	0	0	0	0	0	0.471409217675624
40	Dolasetron	2	360	20	7200	0.452471482889734	0.84070796460177	1	1	1	1	1	-0.793030539066235	-0.1735109271118	0	0	0	0	0	0.488508285352903
40	Dolasetron	2	360	21	7560	0.440414507772021	0.834064969271291	1	1	1	1	1	-0.820038932414569	-0.181443978852595	0	0	0	0	0	0.505145505831533
40	Dolasetron	2	360	22	7920	0.428983417447729	0.827526132404181	1	1	1	1	1	-0.846337014769202	-0.189314592284925	0	0	0	0	0	0.52134517341843
40	Dolasetron	2	360	23	8280	0.418130709768096	0.821089023336214	1	1	1	1	1	-0.871961192544223	-0.19712374259909	0	0	0	0	0	0.53712971453231
40	Dolasetron	2	360	24	8640	0.407813570938999	0.8147512864494	1	1	1	1	1	-0.896945142977156	-0.204872382315851	0	0	0	0	0	0.552519874414053
40	Dolasetron	2	360	25	9000	0.397993311036789	0.808510638297872	1	1	1	1	1	-0.921320080279157	-0.212561441983673	0	0	0	0	0	0.56753488107572
40	Dolasetron	2	360	26	9360	0.388634879163945	0.802364864864865	1	1	1	1	1	-0.945114990112054	-0.220191830849365	0	0	0	0	0	0.582192589738847
40	Dolasetron	2	360	27	9720	0.379706445437141	0.796311818943839	1	1	1	1	1	-0.968356836810391	-0.22776443750333	0	0	0	0	0	0.596509610483608
40	Dolasetron	2	360	28	10080	0.37117903930131	0.790349417637271	1	1	1	1	1	-0.991070747063923	-0.235280130500566	0	0	0	0	0	0.61050142139757
40	Dolasetron	2	360	29	10440	0.363026235509457	0.784475639966969	1	1	1	1	1	-1.0132801731982	-0.242739758958506	0	0	0	0	0	0.624182469156844
40	Dolasetron	2	360	30	10800	0.355223880597015	0.778688524590164	1	1	1	1	1	-1.03500703871354	-0.250144153132716	0	0	0	0	0	0.637566258678351
40	Dolasetron	2	360	31	11160	0.347749853886616	0.772986167615948	1	1	1	1	1	-1.05627186834656	-0.257494124971448	0	0	0	0	0	0.650665433237988
40	Dolasetron	2	360	32	11520	0.340583858042358	0.767366720516963	1	1	1	1	1	-1.07709390458843	-0.264790468649955	0	0	0	0	0	0.663491846246049
41	Lapatinib	2	41.8	1	41.8	0.963708977252995	0.999973589115379	1	0.999979100436801	0.99968301707082	1	1	-0.0369659207661923	-2.64112333940744e-05	0	-2.08997815980866e-05	-0.000317033178887875	0	0	0.0228942737689889
41	Lapatinib	2	41.8	2	83.6	0.929959785522788	0.999947179625792	1	0.999958201747167	0.999366235034315	1	1	-0.0726139351431166	-5.2821769253486e-05	0	-4.17991264043266e-05	-0.000633965879593383	0	0	0.0449766718388304
41	Lapatinib	2	41.8	3	125.4	0.898494414764449	0.999920771531126	1	0.999937303931044	0.999049653699568	1	1	-0.107034788955419	-7.92316076147972e-05	0	-6.26980344371641e-05	-0.000950798165785883	0	0	0.0663030938334488
41	Lapatinib	2	41.8	4	167.2	0.869088631381146	0.999894364831272	1	0.999916406988376	0.998733272875903	1	1	-0.140310166534247	-0.000105640748514912	0	-8.35965057147131e-05	-0.00126753010107438	0	0	0.0869238574799135
41	Lapatinib	2	41.8	5	209	0.841546626231994	0.99986795952612	1	0.999895510919109	0.998417092372885	1	1	-0.172513858410935	-0.000132049191990855	0	-0.000104494540255314	-0.00158416174900744	0	0	0.106884417909917
41	Lapatinib	2	41.8	6	250.8	0.815696649029982	0.999841555615558	1	0.999874615723188	0.998101112000321	1	1	-0.203712746775272	-0.000158456938079214	0	-0.000125392138077197	-0.00190069317307345	0	0	0.126225974703901
41	Lapatinib	2	41.8	7	292.6	0.791387423356623	0.999815153099477	1	0.999853721400559	0.997785331568259	1	1	-0.23396764179643	-0.00018486398681692	0	-0.0001462892991986	-0.00221712443669985	0	0	0.144985987066299
41	Lapatinib	2	41.8	8	334.4	0.768485184159513	0.999788751977766	1	0.999832827951167	0.997469750886987	1	1	-0.263333995096923	-0.000211270338240802	0	-0.000167186023637761	-0.00253345560325472	0	0	0.163198613326823
41	Lapatinib	2	41.8	9	376.2	0.746871215179653	0.999762352250313	1	0.999811935374956	0.997154369767032	1	1	-0.291862511416989	-0.000237675992387917	0	-0.000188082311413034	-0.00284968673604561	0	0	0.180895087726859
41	Lapatinib	2	41.8	10	418	0.726439790575916	0.99973595391701	1	0.999791043671873	0.996839188019161	1	1	-0.319599675420086	-0.000264080949294669	0	-0.000208978162542552	-0.00316581789832009	0	0	0.19810404493263
41	Lapatinib	2	41.8	11	459.8	0.707096445407058	0.999709556977745	1	0.999770152841862	0.996524205454382	1	1	-0.346588207386334	-0.000290485208998132	0	-0.000229873577044567	-0.00348184915326583	0	0	0.214851800743203
41	Lapatinib	2	41.8	12	501.6	0.688756515264334	0.999683161432408	1	0.999749262884868	0.996209421883938	1	1	-0.372867459010812	-0.000316888771535171	0	-0.000250768554937662	-0.00379778056401057	0	0	0.231162595902978
41	Lapatinib	2	41.8	13	543.4	0.671343897423491	0.999656767280889	1	0.999728373800838	0.995894837119315	1	1	-0.398473758512195	-0.000343291636942436	0	-0.00027166309623943	-0.00411361219362208	0	0	0.247058808689245
41	Lapatinib	2	41.8	14	585.2	0.654789995280793	0.999630374523078	1	0.999707485589716	0.995580450972233	1	1	-0.423440712647709	-0.000369693805256695	0	-0.000292557200968572	-0.00442934410510863	0	0	0.262561140953962
41	Lapatinib	2	41.8	15	627	0.639032815198618	0.999603983158863	1	0.999686598251448	0.995266263254652	1	1	-0.447799471934725	-0.000396095276515062	0	-0.00031345086914313	-0.0047449763614188	0	0	0.277688781500744
41	Lapatinib	2	41.8	16	668.8	0.624016190690353	0.999577593188134	1	0.999665711785979	0.994952273778768	1	1	-0.471578964330162	-0.000422496050753988	0	-0.000334344100781482	-0.00506050902544152	0	0	0.292459550031817
41	Lapatinib	2	41.8	17	710.6	0.609689113479073	0.999551204610782	1	0.999644826193253	0.994638482357015	1	1	-0.494806101764809	-0.000448896128010383	0	-0.000355236895901897	-0.00537594216000617	0	0	0.306890024373538
41	Lapatinib	2	41.8	18	752.4	0.596005154639175	0.999524817426696	1	0.999623941473218	0.994324888802064	1	1	-0.517505963230739	-0.00047529550832116	0	-0.000376129254522427	-0.0056912758278827	0	0	0.320995653258584
41	Lapatinib	2	41.8	19	794.2	0.582921961978784	0.999498431635765	1	0.999603057625817	0.994011492926821	1	1	-0.539701957545211	-0.000501694191723245	0	-0.000397021176661459	-0.00600651009178159	0	0	0.334790856588819
41	Lapatinib	2	41.8	20	836	0.570400822199383	0.999472047237879	1	0.999582174650996	0.993698294544427	1	1	-0.561415968439571	-0.000528092178253016	0	-0.000417912662337273	-0.00632164501435436	0	0	0.348289114810324
41	Lapatinib	2	41.8	21	877.8	0.558406278297615	0.999445664232928	1	0.9995612925487	0.99338529346826	1	1	-0.582668484227525	-0.000554489467947526	0	-0.000438803711567932	-0.00663668065819305	0	0	0.3615030487893
41	Lapatinib	2	41.8	22	919.6	0.546905794245171	0.999419282620801	1	0.999540411318876	0.993072489511933	1	1	-0.603478713978692	-0.000580886060843724	0	-0.000459694324371833	-0.00695161708583069	0	0	0.374444491375183
41	Lapatinib	2	41.8	23	961.4	0.535869460268418	0.999392902401389	1	0.999519530961467	0.992759882489293	1	1	-0.623864691848399	-0.000607281956977905	0	-0.000480584500767155	-0.00726645435974115	0	0	0.387124551668
41	Lapatinib	2	41.8	24	1003.2	0.52526973310619	0.99936652357458	1	0.999498651476419	0.992447472214422	1	1	-0.643843370983781	-0.000633677156387258	0	-0.000501474240772081	-0.00758119254233945	0	0	0.3995536728647
41	Lapatinib	2	41.8	25	1045	0.51508120649652	0.999340146140265	1	0.999477772863679	0.992135258501635	1	1	-0.663430708231468	-0.00066007165910865	0	-0.000522363544404909	-0.00789583169598153	0	0	0.411741684439241
41	Lapatinib	2	41.8	26	1086.8	0.505280407865987	0.999313770098334	1	0.99945689512319	0.991823241165482	1	1	-0.682641740707327	-0.000686465465178399	0	-0.000543252411683829	-0.00821037188296459	0	0	0.423697849309698
41	Lapatinib	2	41.8	27	1128.6	0.495845617796837	0.999287395448676	1	0.999436018254899	0.991511420020744	1	1	-0.701490655148787	-0.0007128585746335	0	-0.000564140842627144	-0.00852481316552689	0	0	0.435430906559424
41	Lapatinib	2	41.8	28	1170.4	0.486756709349237	0.99926102219118	1	0.99941514225875	0.991199794882437	1	1	-0.719990850851047	-0.000739250987510845	0	-0.000585028837252939	-0.00883915560584862	0	0	0.446949110205871
41	Lapatinib	2	41.8	29	1212.2	0.477995004736887	0.999234650325738	1	0.99939426713469	0.990888365565809	1	1	-0.738154996886526	-0.000765642703847224	0	-0.000605916395579638	-0.00915339926605033	0	0	0.458260264447873
41	Lapatinib	2	41.8	30	1254	0.469543147208122	0.999208279852237	1	0.999373392882663	0.990577131886339	1	1	-0.755995084219609	-0.000792033723679212	0	-0.000626803517625221	-0.00946754420819468	0	0	0.469371755768435
41	Lapatinib	2	41.8	31	1295.8	0.461384986283149	0.99918191077057	1	0.999352519502614	0.99026609365974	1	1	-0.773522473253593	-0.000818424047043506	0	-0.000647690203408228	-0.0097815904942859	0	0	0.480290582223731
41	Lapatinib	2	41.8	32	1337.6	0.453505474750776	0.999155543080624	1	0.99933164699449	0.989955250701953	1	1	-0.790747937282006	-0.000844813673977366	0	-0.000668576452946537	-0.0100955381862696	0	0	0.491023380209205
42	Lopinavir	2	703.7	1	703.7	0.880194766501524	1	1	0.956840665574957	1	1	1	-0.127612070428862	0	0	-0.0441183950428722	0	0	0	0.0510165989861858
42	Lopinavir	2	703.7	2	1407.4	0.786024873050141	1	1	0.917252651630959	1	1	1	-0.240766841951665	0	0	-0.0863723249022363	0	0	0	0.0942935550084532
42	Lopinavir	2	703.7	3	2111.1	0.71005754624988	1	1	0.880810293528153	1	1	1	-0.342409261175067	0	0	-0.126913007075023	0	0	0	0.131550385697355
42	Lopinavir	2	703.7	4	2814.8	0.647480212403567	1	1	0.84715298819492	1	1	1	-0.434667045869902	0	0	-0.16587397703381	0	0	0	0.16401425295286
42	Lopinavir	2	703.7	5	3518.5	0.595039419922887	1	1	0.815973221057036	1	1	1	-0.519127623659834	0	0	-0.203373741888594	0	0	0	0.192588898029074
42	Lopinavir	2	703.7	6	4222.2	0.550456761993995	1	1	0.787007143145405	1	1	1	-0.597006869057583	0	0	-0.239517954182283	0	0	0	0.217957224319632
42	Lopinavir	2	703.7	7	4925.9	0.512089065858418	1	1	0.760027086408566	1	1	1	-0.669256712316629	0	0	-0.274401206325579	0	0	0	0.240646462328817
42	Lopinavir	2	703.7	8	5629.6	0.47872143412719	1	1	0.734835567529886	1	1	1	-0.736636407886911	0	0	-0.308108522444239	0	0	0	0.2610711381366
42	Lopinavir	2	703.7	9	6333.3	0.449436248728626	1	1	0.711260445968187	1	1	1	-0.799761262206458	0	0	-0.340716606875194	0	0	0	0.279562308970206
42	Lopinavir	2	703.7	10	7037	0.42352748423036	1	1	0.689150985069352	1	1	1	-0.859136869167325	0	0	-0.372294895445116	0	0	0	0.296387994820598
42	Lopinavir	2	703.7	11	7740.7	0.40044304336713	1	1	0.668374625669938	1	1	1	-0.915183736401974	0	0	-0.402906445773337	0	0	0	0.31176779146442
42	Lopinavir	2	703.7	12	8444.4	0.379744975907862	1	1	0.648814326232876	1	1	1	-0.968255367592818	0	0	-0.432608695301296	0	0	0	0.325883535110973
42	Lopinavir	2	703.7	13	9148.1	0.361081428401813	1	1	0.630366356756407	1	1	1	-1.01865178264494	0	0	-0.46145410995205	0	0	0	0.338887225166931
42	Lopinavir	2	703.7	14	9851.8	0.344166478051898	1	1	0.612938458637164	1	1	1	-1.06662979084844	0	0	-0.489490741826067	0	0	0	0.350907003727479
42	Lopinavir	2	703.7	15	10555.5	0.328765381068964	1	1	0.5964483015694	1	1	1	-1.11241091006305	0	0	-0.516762710824001	0	0	0	0.362051732590636
42	Lopinavir	2	703.7	16	11259.2	0.314683612105276	1	1	0.580822183006828	1	1	1	-1.15618755092524	0	0	-0.543310622318639	0	0	0	0.372414541518509
42	Lopinavir	2	703.7	17	11962.9	0.301758604789615	1	1	0.56599392683909	1	1	1	-1.19812790312403	0	0	-0.569171930802792	0	0	0	0.382075610758452
42	Lopinavir	2	703.7	18	12666.6	0.289853447405896	1	1	0.551903946567802	1	1	1	-1.23837983750864	0	0	-0.594381257687449	0	0	0	0.391104375990188
42	Lopinavir	2	703.7	19	13370.3	0.278852014260826	1	1	0.538498445012823	1	1	1	-1.27707405271623	0	0	-0.618970670016933	0	0	0	0.399561292339426
42	Lopinavir	2	703.7	20	14074	0.268655165246311	1	1	0.525728727885425	1	1	1	-1.31432663531687	0	0	-0.642969925730619	0	0	0	0.407499258039506
42	Lopinavir	2	703.7	21	14777.7	0.259177749815768	1	1	0.513550612764865	1	1	1	-1.35024115994879	0	0	-0.666406690176868	0	0	0	0.414964772705739
42	Lopinavir	2	703.7	22	15481.4	0.250346223500586	1	1	0.501923918358943	1	1	1	-1.38491042519879	0	0	-0.689306727830238	0	0	0	0.421998886736564
42	Lopinavir	2	703.7	23	16185.1	0.242096735674382	1	1	0.490812021606929	1	1	1	-1.41841789850622	0	0	-0.711694072543704	0	0	0	0.428637984897357
42	Lopinavir	2	703.7	24	16888.8	0.234373583331822	1	1	0.480181472339011	1	1	1	-1.45083892672662	0	0	-0.733591179156722	0	0	0	0.434914437210683
42	Lopinavir	2	703.7	25	17592.5	0.227127951674904	1	1	0.470001656950909	1	1	1	-1.48224175653339	0	0	-0.755019058856781	0	0	0	0.440857142867321
42	Lopinavir	2	703.7	26	18296.2	0.220316881301617	1	1	0.460244503970829	1	1	1	-1.51268839941418	0	0	-0.775997400339859	0	0	0	0.446491987289102
42	Lopinavir	2	703.7	27	18999.9	0.213902415814712	1	1	0.450884225554827	1	1	1	-1.54223536882613	0	0	-0.796544678520965	0	0	0	0.451842228227778
42	Lopinavir	2	703.7	28	19703.6	0.207850894120674	1	1	0.441897089897634	1	1	1	-1.57093431153343	0	0	-0.816678252299049	0	0	0	0.456928823525671
42	Lopinavir	2	703.7	29	20407.3	0.202132359553198	1	1	0.433261220329757	1	1	1	-1.59883255084755	0	0	-0.836414452672706	0	0	0	0.461770710643077
42	Lopinavir	2	703.7	30	21111	0.196720063924508	1	1	0.424956417520157	1	1	1	-1.6259735561225	0	0	-0.85576866232742	0	0	0	0.466385046092455
42	Lopinavir	2	703.7	31	21814.7	0.191590049176015	1	1	0.416964001742584	1	1	1	-1.65239735020109	0	0	-0.874755387666098	0	0	0	0.470787411376542
42	Lopinavir	2	703.7	32	22518.4	0.186720792822987	1	1	0.409266672612895	1	1	1	-1.67814086440006	0	0	-0.893388324127868	0	0	0	0.474991990807943
43	Nilotinib	2	60	1	60	0.666666666666667	0.999881589074619	0.987410826689047	0.999447386599125	0.999849309460603	1	0.999981026694031	-0.405465108108164	-0.000118417936508544	-0.0126690883713797	-0.000552766147936478	-0.000150701894356939	0	-1.897348596423e-05	0.246809666097647
43	Nilotinib	2	60	2	120	0.5	0.999763206188212	0.975134687111479	0.998895383624062	0.999698664329641	1	0.999962054108021	-0.693147180559945	-0.000236821851869533	-0.0251796768976693	-0.00110522691425522	-0.000301381081074761	0	-3.7946611942269e-05	0.421098431637347
43	Nilotinib	2	60	3	180	0.4	0.999644851330821	0.963160049119935	0.99834399006394	0.999548064586592	1	0.99994308224193	-0.916290731874155	-0.000355211749403252	-0.0375356825303779	-0.00165738263619327	-0.000452037566996033	0	-5.69193779474326e-05	0.555664188719758
43	Nilotinib	2	60	4	240	0.333333333333333	0.999526524492493	0.95147594015366	0.997793204910119	0.999397510210947	1	0.999924111095715	-1.09861228866811	-0.000473587632428308	-0.0497408787940537	-0.00220923365042817	-0.000602671358959269	0	-7.58917839939269e-05	0.665115564344089
43	Nilotinib	2	60	5	300	0.285714285714286	0.99940822566328	0.940071913703556	0.997243027156182	0.999247001182208	1	0.999905140669336	-1.25276296849537	-0.000591949504262288	-0.0617989027044118	-0.00276078029308133	-0.000753282463800815	0	-9.48638300946281e-05	0.757244901810211
43	Nilotinib	2	60	6	360	0.25	0.999289954833238	0.928938018160284	0.996693455797933	0.999096537479892	1	0.999886170962753	-1.38629436111989	-0.000710297368221314	-0.0737132612743128	-0.00331202289971762	-0.000903870888353061	0	-0.000113835516263747	0.836703253292371
43	Nilotinib	2	60	7	420	0.222222222222222	0.999171711992427	0.918064767850176	0.996144489833387	0.998946119083525	1	0.999867201975923	-1.50407739677627	-0.00082863122762104	-0.0854873376367085	-0.00386296180534807	-0.00105443663944632	0	-0.000132806842515052	0.906490405887637
43	Nilotinib	2	60	8	480	0.2	0.999053497130913	0.907443116081759	0.995596128262764	0.998795745972648	1	0.999848233708807	-1.6094379124341	-0.00094695108577532	-0.0971243968113018	-0.00441359734442931	-0.00120497972390662	0	-0.00015177780886176	0.968654391326034
43	Nilotinib	2	60	9	540	0.181818181818182	0.998935310238766	0.897064430041937	0.995048370088487	0.998645418126814	1	0.999829266161363	-1.70474809223843	-0.00106525694599698	-0.108627591139511	-0.00496392985086674	-0.0013555001485582	0	-0.000170748415317867	1.02465581323239
43	Nilotinib	2	60	10	600	0.166666666666667	0.998817151306062	0.886920467395401	0.994501214315172	0.998495135525586	1	0.999810299333551	-1.79175946922805	-0.00118354881159748	-0.119999965410377	-0.00551395965801386	-0.001505997920221	0	-0.000189718661896704	1.07557297572047
43	Nilotinib	2	60	11	660	0.153846153846154	0.998699020322879	0.877003354453969	0.993954659949622	0.998344898148543	1	0.999791333225328	-1.87180217690159	-0.00130182668588781	-0.131244461698262	-0.00606368709867554	-0.00165647304571287	0	-0.000208688548612161	1.12222462170575
43	Nilotinib	2	60	12	720	0.142857142857143	0.998580917279303	0.867305565794324	0.993408706000824	0.998194705975272	1	0.999772367836655	-1.94591014905531	-0.00142009057217703	-0.142363923931569	-0.00661311250510689	-0.00180692553184776	0	-0.000227658075478019	1.16524705527288
43	Nilotinib	2	60	13	780	0.133333333333333	0.998462842165422	0.85781990521327	0.99286335147994	0.998044558985377	1	0.999753403167491	-2.01490302054226	-0.00153834047377328	-0.153361102210241	-0.00716223620901654	-0.00195735538543737	0	-0.000246627242507505	1.20514459178325
43	Nilotinib	2	60	14	840	0.125	0.99834479497133	0.848539487919221	0.992318595400302	0.99789445715847	1	0.999734439217794	-2.07944154167984	-0.00165657639398334	-0.164238656888416	-0.00771105854156648	-0.00210776261328942	0	-0.000265596049714737	1.24232369239049
43	Nilotinib	2	60	15	900	0.117647058823529	0.998226775687124	0.839457723867285	0.991774436777407	0.997744400474177	1	0.999715475987523	-2.14006616349627	-0.00177479833611348	-0.174999162437426	-0.00825957983337416	-0.00225814722220959	0	-0.000284564497112949	1.2771167318078
43	Nilotinib	2	60	16	960	0.111111111111111	0.99810878430291	0.830568302153195	0.991230874628911	0.997594388912138	1	0.999696513476638	-2.19722457733622	-0.00189300630346827	-0.185645111103154	-0.00880780041451287	-0.00240850921899931	0	-0.000303532584716263	1.30979896198346
43	Nilotinib	2	60	17	1020	0.105263157894737	0.997990820808793	0.821865176388404	0.99068790797462	0.997444422452001	1	0.999677551685098	-2.2512917986065	-0.00201120029935069	-0.196178916370753	-0.00935572061451366	-0.00255884861045819	0	-0.000322500312537805	1.34060088299349
43	Nilotinib	2	60	18	1080	0.1	0.997872885194887	0.813342550985137	0.990145535836489	0.997294501073432	1	0.999658590612862	-2.30258509299405	-0.00212938032706356	-0.206602916248773	-0.0099033407623659	-0.00270916540338159	0	-0.00034146768059137	1.36971743692581
43	Nilotinib	2	60	19	1140	0.0952380952380952	0.997754977451309	0.804994868286007	0.989603757238612	0.997144624756103	1	0.999639630259888	-2.35137525716348	-0.00224754638990798	-0.216919376383884	-0.0104506611865192	-0.00285945960456281	0	-0.000360434688891089	1.39731495615282
43	Nilotinib	2	60	20	1200	0.0909090909090909	0.99763709756818	0.796816796478158	0.989062571207219	0.996994793479704	1	0.999620670626136	-2.39789527279837	-0.00236569849118365	-0.22713049301656	-0.0109976822148836	-0.0030097312207913	0	-0.000379401337449872	1.42353649361246
43	Nilotinib	2	60	21	1260	0.0869565217391304	0.997519245535626	0.788803218236675	0.988521976770667	0.996845007223932	1	0.999601711711565	-2.4423470353692	-0.00248383663418936	-0.237238395787386	-0.011544404174832	-0.00315998025885425	0	-0.000398367626282076	1.44850596714885
43	Nilotinib	2	60	22	1320	0.0833333333333333	0.99740142134378	0.780949220046465	0.987981972959439	0.9966952659685	1	0.999582753516135	-2.484906649788	-0.00260196082222292	-0.247245150402939	-0.0120908273931998	-0.00331020672553475	0	-0.000417333555400616	1.47233142108213
43	Nilotinib	2	60	23	1380	0.08	0.997283624982777	0.773250082155767	0.987442558806133	0.996545569693131	1	0.999563796039803	-2.52572864430826	-0.00272007105858078	-0.257152761169609	-0.0126369521962879	-0.00346041062761394	0	-0.000436299124819632	1.49510762144336
43	Nilotinib	2	60	24	1440	0.0769230769230769	0.997165856442756	0.765701269118126	0.98690373334546	0.996395918377563	1	0.999544839282529	-2.56494935746154	-0.00283816734655809	-0.266963173403122	-0.0131827789098619	-0.00361059197186898	0	-0.000455264334552822	1.51691814182466
43	Nilotinib	2	60	25	1500	0.0740740740740741	0.997048115713864	0.758298420883016	0.986365495614234	0.996246312001541	1	0.999525883244273	-2.60268968544438	-0.00295624968944882	-0.276678275721018	-0.0137283078591552	-0.00376075076507469	0	-0.000474229184613442	1.53783705529028
43	Nilotinib	2	60	26	1560	0.0714285714285714	0.99693040278625	0.75103734439834	0.985827844651374	0.996096750544829	1	0.999506927924993	-2.63905732961526	-0.00307431809054634	-0.286299902224829	-0.0142735393688683	-0.00391088701400226	0	-0.000493193675015526	1.55793031837791
43	Nilotinib	2	60	27	1620	0.0689655172413793	0.996812717650068	0.7439140056908	0.985290779497889	0.995947233987196	1	0.999487973324649	-2.67414864942653	-0.00319237255314216	-0.295829834578286	-0.0148184737631717	-0.00406100072542043	0	-0.000512157805772336	1.5772569120691
43	Nilotinib	2	60	28	1680	0.0666666666666667	0.996695060295477	0.736924522392734	0.984754299196878	0.995797762308429	1	0.9994690194432	-2.70805020110221	-0.00331041308052695	-0.30526980398742	-0.0153631113657055	-0.00421109190609415	0	-0.000531121576897799	1.59586978919929
43	Nilotinib	2	60	29	1740	0.0645161290322581	0.996577430712642	0.730065156686317	0.984218402793524	0.995648335488324	1	0.999450066280604	-2.7408400239252	-0.00342843967598998	-0.314621493088075	-0.0159074524995821	-0.00436116056278624	0	-0.000550084988405515	1.61381666641434
43	Nilotinib	2	60	30	1800	0.0625	0.99645982889173	0.72333230863818	0.983683089335086	0.99549895350669	1	0.99943111383682	-2.77258872223978	-0.00354645234281987	-0.323886537745989	-0.0164514974873856	-0.00451120670225541	0	-0.000569048040308973	1.63114069030578
43	Nilotinib	2	60	31	1860	0.0606060606060606	0.996342254822914	0.716722509899482	0.983148357870895	0.995349616343348	1	0.999412162111809	-2.80336038090653	-0.00366445108430363	-0.33306652877423	-0.0169952466511749	-0.00466123033125842	0	-0.000588010732622109	1.64788100096988
43	Nilotinib	2	60	32	1920	0.0588235294117647	0.996224708496372	0.710232417748265	0.982614207452348	0.995200323978132	1	0.999393211105529	-2.83321334405622	-0.00378243590372697	-0.342163013572533	-0.0175387003124828	-0.00481123145654804	0	-0.000606973065358194	1.66407321137514
44	Paliperidone	2	68.9	1	68.9	0.941055693386945	0.999368289219017	1	0.999826960898437	0.999725779766527	1	0.998909199734084	-0.0607529558272626	-0.000631910394308433	0	-0.00017305407455549	-0.000274257838716469	0	-0.00109139562150803	0.0374335847590182
44	Paliperidone	2	68.9	2	137.8	0.888673452900307	0.998737376051194	1	0.999653981671575	0.999451709885297	1	0.99782077656567	-0.118025430518799	-0.00126342173002659	0	-0.000346078206580007	-0.000548440480693386	0	-0.00218160139708812	0.0727231730776502
44	Paliperidone	2	68.9	3	206.7	0.841815259814801	0.998107258986857	1	0.999481062288342	0.999177790232689	1	0.996734722732875	-0.172194695208638	-0.00189453451085603	0	-0.000519072406433001	-0.000822547967155315	0	-0.00327061991826898	0.106101164686591
44	Paliperidone	2	68.9	4	275.6	0.799651061355045	0.997477936520138	1	0.999308202717689	0.998904020685218	1	0.995651030507573	-0.223579819771649	-0.00252524923954624	0	-0.000692036684469284	-0.00109658033929197	0	-0.00435845376812274	0.137764107232753
44	Paliperidone	2	68.9	5	344.5	0.761509172724126	0.996849407148965	1	0.999135402928587	0.998630401119533	1	0.99456969219521	-0.272453061119828	-0.00315556641789498	0	-0.000864971051037343	-0.00137053763825951	0	-0.00544510552129988	0.167879711490943
44	Paliperidone	2	68.9	6	413.4	0.726840227302762	0.996221669375049	1	0.99896266289003	0.998356931412419	1	0.993490700134625	-0.319048595473959	-0.00378548654675246	0	-0.00103787551648111	-0.00164441990518072	0	-0.00653057774406713	0.196592230459422
44	Paliperidone	2	68.9	7	482.3	0.695190545408582	0.995594721703874	1	0.998789982571032	0.998083611440796	1	0.992414046697864	-0.363569304938476	-0.00441501012602251	0	-0.00121075009113915	-0.00191822718114398	0	-0.0076148729943435	0.224026639902627
44	Paliperidone	2	68.9	8	551.2	0.666182170542636	0.994968562644681	1	0.99861736194063	0.997810441081718	1	0.991339724290004	-0.406192116500782	-0.00504413765466605	0	-0.0013835947853439	-0.00219195950720391	0	-0.00869799382173637	0.250291927184678
44	Paliperidone	2	68.9	9	620.1	0.639497703621882	0.994343190710463	1	0.99844480096788	0.997537420212375	1	0.990267725348976	-0.447072248865883	-0.00567286963070215	0	-0.00155640960942341	-0.00246561692438239	0	-0.00977994276757711	0.275483707327398
44	Paliperidone	2	68.9	10	689	0.614868641699273	0.993718604417945	1	0.998272299621862	0.99726454871009	1	0.98919804234538	-0.486346624722257	-0.00630120655121151	0	-0.00172919457369933	-0.00273919947366636	0	-0.0108607223649582	0.299686324972422
44	Paliperidone	2	68.9	11	757.9	0.59206631142688	0.99309480228758	1	0.998099857871675	0.99699182645232	1	0.988130667782318	-0.524136637825663	-0.00692914891233866	0	-0.0019019496884889	-0.00301270719601001	0	-0.0119403351387666	0.322974558909975
44	Paliperidone	2	68.9	12	826.8	0.57089474776832	0.992471782843532	1	0.997927475686442	0.996719253316657	1	0.987065594195214	-0.560550415969604	-0.00755669720929336	0	-0.00207467496410382	-0.00328614013233367	0	-0.0130187836057213	0.345415016072873
44	Paliperidone	2	68.9	13	895.7	0.551185047852884	0.991849544613665	1	0.997755153035305	0.996446829180827	1	0.986002814151639	-0.595684686187478	-0.00818385193635445	0	-0.0022473704108498	-0.00355949832352375	0	-0.0140960702744073	0.367067280504517
44	Paliperidone	2	68.9	14	964.6	0.532790855371501	0.991228086129536	1	0.997582889887429	0.996174553922688	1	0.984942320251141	-0.629626323245028	-0.00881061358687063	0	-0.00242003603902808	-0.00383278181043398	0	-0.0151721976453107	0.387984867233117
44	Paliperidone	2	68.9	15	1033.5	0.515584719943754	0.990607405926377	1	0.997410686211998	0.995902427420234	1	0.983884105125072	-0.662453643841593	-0.00943698265326432	0	-0.00259267185893378	-0.00410599063388375	0	-0.0162471682108539	0.40821601950207
44	Paliperidone	2	68.9	16	1102.4	0.499455139847439	0.989987502543087	1	0.99723854197822	0.99563044955159	1	0.982828161436417	-0.694237495041936	-0.0100629596270322	0	-0.00276527788085731	-0.00437912483465927	0	-0.0173209844554306	0.427804379245982
44	Paliperidone	2	68.9	17	1171.3	0.484304143001805	0.989368374522221	1	0.997066457155322	0.995358620195015	1	0.981774481879624	-0.725042174990909	-0.0106885449987499	0	-0.00293785411508378	-0.00465218445351363	0	-0.018393648855439	0.446789554252621
44	Paliperidone	2	68.9	18	1240.2	0.470045295273908	0.988750020409978	1	0.996894431712555	0.995086939228901	1	0.980723059180438	-0.754926215998396	-0.0113137392580714	0	-0.00311040057189215	-0.00492516953116638	0	-0.0194651638793172	0.46520760054469
44	Paliperidone	2	68.9	19	1309.1	0.4566020505583	0.988132438756186	1	0.996722465619188	0.994815406531772	1	0.979673886095731	-0.783943053967267	-0.011938542893734	0	-0.00328291726155705	-0.00519808010830344	0	-0.0205355319875766	0.48309143474869
44	Paliperidone	2	68.9	20	1378	0.443906376109766	0.987515628114298	1	0.996550558844512	0.994544021982286	1	0.978626955413335	-0.812141603402626	-0.0125629563935593	0	-0.00345540419434714	-0.00547091622557788	0	-0.0216047556328363	0.500471188301692
44	Paliperidone	2	68.9	21	1446.9	0.431897601005143	0.986899587041375	1	0.996378711357842	0.994272785459232	1	0.977582259951881	-0.83956675354551	-0.0131869802444549	0	-0.00362786138052594	-0.00574367792360907	0	-0.0226728372598566	0.517374513070608
44	Paliperidone	2	68.9	22	1515.8	0.420521446593776	0.986284314098075	1	0.99620692312851	0.994001696841532	1	0.97653979256063	-0.86625979826859	-0.0138106149324187	0	-0.0038002888303522	-0.0060163652429837	0	-0.0237397793055726	0.533826846168749
44	Paliperidone	2	68.9	23	1584.7	0.409729206242783	0.985669807848645	1	0.996035194125872	0.99373075600824	1	0.975499546119313	-0.89225881007046	-0.0144338609425386	0	-0.00397268655407829	-0.00628897822425492	0	-0.0248055841991276	0.549851640336999
44	Paliperidone	2	68.9	24	1653.6	0.399477048227775	0.985056066860906	1	0.995863524319305	0.993459962838541	1	0.974461513537968	-0.917598966670813	-0.0150567187589971	0	-0.0041450545619522	-0.00656151690794222	0	-0.0258702543619056	0.565470565127047
44	Paliperidone	2	68.9	25	1722.5	0.389725420726306	0.984443089706248	1	0.995691913678205	0.993189317211752	1	0.973425687756777	-0.942312837237355	-0.0156791888650719	0	-0.0043173928642161	-0.00683398133453318	0	-0.0269337922075655	0.580703683217706
44	Paliperidone	2	68.9	26	1791.4	0.380438541882825	0.983830874959609	1	0.995520362171992	0.992918819007322	1	0.972392061745911	-0.96643063408788	-0.0163012717431393	0	-0.00448970147110706	-0.00710637154448131	0	-0.0279962001420732	0.595569605463849
44	Paliperidone	2	68.9	27	1860.3	0.371583961085025	0.983219421199474	1	0.995348869770104	0.992648468104832	1	0.971360628505363	-0.989980434747294	-0.0169229678746751	0	-0.00466198039285728	-0.00737868757820714	0	-0.029057480563734	0.610085627683956
44	Paliperidone	2	68.9	28	1929.2	0.363132180113561	0.982608727007857	1	0.995177436442002	0.992378264383991	1	0.9703313810648	-1.01298837845321	-0.0175442777402587	0	-0.00483422963969255	-0.00765092947609897	0	-0.0301176358632262	0.624267851707919
44	Paliperidone	2	68.9	29	1998.1	0.355056324844259	0.981998790970296	1	0.995006062157168	0.992108207724643	1	0.969304312483396	-1.03547884055901	-0.0181652018195738	0	-0.00500644922183451	-0.00792309727851126	0	-0.0311766684236322	0.638131292809664
44	Paliperidone	2	68.9	30	2067	0.347331859804231	0.981389611675835	1	0.994834746885105	0.99183829800676	1	0.968279415849682	-1.05747458775218	-0.0187857405914108	0	-0.00517863914949924	-0.00819519102576551	0	-0.0322345806204711	0.651689975321919
44	Paliperidone	2	68.9	31	2135.9	0.33993633919466	0.98078118771702	1	0.994663490595336	0.991568535110445	1	0.967256684281392	-1.07899691656585	-0.0194058945336699	0	-0.00535079943289689	-0.00846721075815135	0	-0.0332913748217308	0.664957017959589
44	Paliperidone	2	68.9	32	2204.8	0.332849189058339	0.980173517689884	1	0.994492293257406	0.991298918915932	1	0.966236110925303	-1.10006577729609	-0.0200256641233622	0	-0.00552293008223344	-0.00873915651592436	0	-0.0343470533878996	0.67794471015303
45	Risperidone	2	6.96	1	6.96	0.974998114081881	0.999884013454439	1	0.999870166112759	0.999901952442427	1	1	-0.0253197422611542	-0.000115993272520203	0	-0.000129842316390154	-9.80523645494612e-05	0	0	0.0155579473167213
45	Risperidone	2	6.96	2	13.92	0.951215922113696	0.999768053811516	1	0.999740365934817	0.999803924109615	1	1	-0.0500141947699489	-0.000231973092161716	0	-0.000259667775942148	-0.000196095115775033	0	0	0.0307307213949319
45	Risperidone	2	6.96	3	20.88	0.92856629683988	0.99965212106187	1	0.999610599453049	0.999705914995913	1	1	-0.0741134986491225	-0.000347939462044465	0	-0.000389476383031831	-0.000294128255562104	0	0	0.0455368892203085
45	Risperidone	2	6.96	4	27.84	0.906970216434593	0.999536215196149	1	0.999480866654335	0.999607925095667	1	1	-0.0976456668542391	-0.000463892385287526	0	-0.00051926814203406	-0.000392151785794728	0	0	0.0599937068235945
45	Risperidone	2	6.96	5	34.8	0.886355843367002	0.999420336205001	1	0.999351167525562	0.999509954403229	1	1	-0.120636779926032	-0.000579831865009118	0	-0.000649043057321911	-0.000490165708356401	0	0	0.0741172398644087
45	Risperidone	2	6.96	6	41.76	0.866657726092746	0.999304484079081	1	0.999221502053624	0.999412002912951	1	1	-0.143111159740716	-0.000695757904325938	0	-0.000778801133266238	-0.000588170025130834	0	0	0.0879224706617597
45	Risperidone	2	6.96	7	48.72	0.847816104879443	0.999188658809047	1	0.999091870225422	0.999314070619189	1	1	-0.165091524160699	-0.000811670506353824	0	-0.000908542374236667	-0.000686164738000182	0	0	0.101423393459173
45	Risperidone	2	6.96	8	55.68	0.829776306255904	0.999072860385562	1	0.998962272027864	0.999216157516301	1	1	-0.18659912505104	-0.000927569674207643	0	-0.00103826678460115	-0.000784149848846811	0	0	0.114633099443083
45	Risperidone	2	6.96	9	62.64	0.812488213159951	0.998957088799293	1	0.998832707447863	0.999118263598644	1	1	-0.207653871763531	-0.00104345541100107	0	-0.00116797436872594	-0.000882125359552305	0	0	0.12756385280926
45	Risperidone	2	6.96	10	69.6	0.79590579997009	0.998841344040913	1	0.998703176472342	0.999020388860583	1	1	-0.228274441886809	-0.00115932771984645	0	-0.00129766513097509	-0.000980091271997131	0	0	0.140227158985082
45	Risperidone	2	6.96	11	76.56	0.779986723336753	0.998725626101095	1	0.998573679088228	0.99892253329648	1	1	-0.248478380806502	-0.00127518660385552	0	-0.00142733907571138	-0.00107804758806241	0	0	0.152633825958771
45	Risperidone	2	6.96	12	83.52	0.764691961153888	0.998609934970521	1	0.998444215282455	0.998824696900701	1	1	-0.268282191405301	-0.00139103206613857	0	-0.00155699620729624	-0.00117599430962759	0	0	0.164794019534805
45	Risperidone	2	6.96	13	90.48	0.749985493190089	0.998494270639875	1	0.998314785041966	0.998726879667616	1	1	-0.287701415052063	-0.0015068641098049	0	-0.00168663653008841	-0.00127393143857177	0	0	0.176717313223352
45	Risperidone	2	6.96	14	97.44	0.73583401787675	0.998378633099846	1	0.998185388353709	0.998629081591593	1	1	-0.306750704875736	-0.00162268273796295	0	-0.00181626004844581	-0.00137185897677439	0	0	0.188412733377151
45	Risperidone	2	6.96	15	104.4	0.722206700565964	0.998263022341126	1	0.998056025204639	0.998531302667008	1	1	-0.325443892189624	-0.00173848795371963	0	-0.00194586676672457	-0.00146977692611318	0	0	0.199888800108975
45	Risperidone	2	6.96	16	111.36	0.709074949252702	0.998147438354414	1	0.997926695581717	0.998433542888234	1	1	-0.34379404682026	-0.00185427976018129	0	-0.00207545668927854	-0.00156768528846566	0	0	0.211153564454333
45	Risperidone	2	6.96	17	118.32	0.69641221432805	0.998031881130411	1	0.997797399471912	0.998335802249649	1	1	-0.361813532000026	-0.00197005816045273	0	-0.00220502982046043	-0.00166558406570943	0	0	0.222214642185426
45	Risperidone	2	6.96	18	125.28	0.684193809412174	0.997916350659822	1	0.9976681368622	0.998238080745631	1	1	-0.379514054400971	-0.00208582315763799	0	-0.00233458616462112	-0.00176347325972088	0	0	0.233079244632069
45	Risperidone	2	6.96	19	132.24	0.672396750722763	0.997800846933359	1	0.997538907739562	0.998140378370564	1	1	-0.396906709816932	-0.00220157475483991	0	-0.00246412572611	-0.00186135287237558	0	0	0.243754206821966
45	Risperidone	2	6.96	20	139.2	0.66099961277973	0.997685369941735	1	0.997409712090988	0.99804269511883	1	1	-0.41400202494041	-0.0023173129551603	0	-0.00259364850927408	-0.00195922290554964	0	0	0.254246013215343
45	Risperidone	2	6.96	21	146.16	0.649982398540156	0.99756991967567	1	0.997280549903472	0.997945030984816	1	1	-0.430809995628092	-0.00243303776169978	0	-0.00272315451845941	-0.00205708336111739	0	0	0.264560821276574
45	Risperidone	2	6.96	22	153.12	0.639326422307491	0.997454496125887	1	0.997151421164018	0.99784738596291	1	1	-0.447340122003311	-0.00254874917755806	0	-0.00285264375801034	-0.00215493424095369	0	0	0.274704483097373
45	Risperidone	2	6.96	23	160.08	0.629014203972663	0.997339099283113	1	0.997022325859634	0.997749760047501	1	1	-0.46360144070413	-0.00266444720583341	0	-0.00298211623226869	-0.00225277554693205	0	0	0.284682565261664
45	Risperidone	2	6.96	24	167.04	0.619029373327951	0.99722372913808	1	0.996893263977336	0.997652153232984	1	1	-0.479602554551098	-0.0027801318496239	0	-0.00311157194557556	-0.00235060728092563	0	0	0.294500367120977
45	Risperidone	2	6.96	25	174	0.609356583351855	0.997108385681524	1	0.996764235504147	0.997554565513752	1	1	-0.495351659878552	-0.00289580311202543	0	-0.0032410109022701	-0.00244842944480745	0	0	0.304162937630583
45	Risperidone	2	6.96	26	180.96	0.59998143149881	0.996993068904185	1	0.996635240427095	0.997456996884203	1	1	-0.510856571746859	-0.00301146099613362	0	-0.00337043310668936	-0.00254624204044961	0	0	0.313675090880277
45	Risperidone	2	6.96	27	187.92	0.590890388144704	0.996877778796809	1	0.996506278733218	0.997359447338735	1	1	-0.526124747229717	-0.00312710550504247	0	-0.00349983856316911	-0.00264404506972333	0	0	0.323041420439406
45	Risperidone	2	6.96	28	194.88	0.582070731440556	0.996762515350143	1	0.996377350409556	0.997261916871751	1	1	-0.541163306950271	-0.00324273664184534	0	-0.0036292272760435	-0.00274183853450011	0	0	0.332266312623148
45	Risperidone	2	6.96	29	201.84	0.573510487914651	0.996647278554941	1	0.99624845544316	0.997164405477654	1	1	-0.555979055021686	-0.00335835440963422	0	-0.00375859924964478	-0.00283962243665034	0	0	0.341353958775948
45	Risperidone	2	6.96	30	208.8	0.565198378239928	0.996532068401961	1	0.996119593821085	0.997066913150849	1	1	-0.570578497531989	-0.00347395881150022	0	-0.00388795448830338	-0.00293739677804369	0	0	0.350308366658213
45	Risperidone	2	6.96	31	215.76	0.557123767650083	0.996416884881965	1	0.995990765530395	0.996969439885744	1	1	-0.584967859698867	-0.00358954985053329	0	-0.00401729299634838	-0.00303516156055006	0	0	0.3591333710137
45	Risperidone	2	6.96	32	222.72	0.549276620546041	0.996301727985717	1	0.995861970558158	0.996871985676751	1	1	-0.599153101807629	-0.00370512752982239	0	-0.00414661477810723	-0.00313291678603784	0	0	0.367832643387328
46	Ritonavir	2	436.9	1	436.9	0.92189706644738	0.974943940723408	0.942603029467019	0.949578183245046	1	1	1	-0.0813217032551317	-0.0253753063312282	-0.0591100505500596	-0.0517374106293643	0	0	0	0.00524808470162565
46	Ritonavir	2	436.9	2	873.8	0.855110433110035	0.951112801978315	0.891437232879436	0.903997011580127	1	1	1	-0.156524656853804	-0.0501226094032105	-0.114920250350019	-0.10092922436962	0	0	0	0.00901625855927502
46	Ritonavir	2	436.9	3	1310.7	0.797346815715015	0.928418902608857	0.845540144006976	0.862591338442345	1	1	1	-0.226465543381112	-0.0742722443745874	-0.167779632164501	-0.147814236040295	0	0	0	0.0116091500298936
46	Ritonavir	2	436.9	4	1747.6	0.746893375430872	0.906782734856728	0.804137807365566	0.824812542603954	1	1	1	-0.291832841077552	-0.0978524001675046	-0.217984622294871	-0.192599139552195	0	0	0	0.013258964448089
46	Ritonavir	2	436.9	5	2184.5	0.702445004426888	0.886132033673017	0.766600779956194	0.790204081632653	1	1	1	-0.353188166352033	-0.120889317275453	-0.265789108613562	-0.23546403570225	0	0	0	0.0141453792676903
46	Ritonavir	2	436.9	6	2621.4	0.662989817957421	0.866400970369087	0.732411906414601	0.758382952052648	1	1	1	-0.410995646444488	-0.143407463294729	-0.311412209603651	-0.276566807127511	0	0	0	0.0144092600774976
46	Ritonavir	2	436.9	7	3058.3	0.627731184497219	0.847529451648445	0.70114234899788	0.72902545564091	1	1	1	-0.465643254317226	-0.165429689123736	-0.355044346945062	-0.316046629008482	0	0	0	0.0141623242750352
46	Ritonavir	2	436.9	8	3495.2	0.596033378793833	0.829462508294625	0.672433506401005	0.701856148491879	1	1	1	-0.517458608797352	-0.186977368330149	-0.396852047634763	-0.354026812632852	0	0	0	0.0134940809865386
46	Ritonavir	2	436.9	9	3932.1	0.567382909198931	0.812149760415821	0.645983199935177	0.676639172375227	1	1	1	-0.566720878317772	-0.208070521816689	-0.436981781830001	-0.390617128397706	0	0	0	0.0124769000949764
46	Ritonavir	2	436.9	10	4369	0.54136048708797	0.795544948289578	0.621534996534997	0.653171390013495	1	1	1	-0.613669887309847	-0.22872792960811	-0.475563059825885	-0.425915718579455	0	0	0	0.0111697711912238
46	Ritonavir	2	436.9	11	4805.9	0.517620371578556	0.779605519607079	0.598869867873031	0.631276901004304	1	1	1	-0.658513178806116	-0.248967231323668	-0.512710953428543	-0.460010683848217	0	0	0	0.00962112920525744
46	Ritonavir	2	436.9	12	5242.8	0.495874920671551	0.764292265362275	0.577799610236918	0.610802624936901	1	1	1	-0.701431560124361	-0.268805016682092	-0.548528165514235	-0.492981408107764	0	0	0	0.00787100472676913
46	Ritonavir	2	436.9	13	5679.7	0.475882879474379	0.74956899782625	0.558161606260745	0.591614717027258	1	1	1	-0.742583506550774	-0.288256907202623	-0.58310674157698	-0.524899671803021	0	0	0	0.00595267878716906
46	Ritonavir	2	436.9	14	6116.6	0.457440391711609	0.735402265038976	0.539814619759848	0.573595638776961	1	1	1	-0.78210869409596	-0.307337630110222	-0.616529495104654	-0.555830592973606	0	0	0	0.00389396934124231
46	Ritonavir	2	436.9	15	6553.5	0.440374023312412	0.721761097076868	0.52263539352442	0.55664174813111	1	1	1	-0.820130860177496	-0.326061085320896	-0.648871202348082	-0.585833427077706	0	0	0	0.00171824080006214
46	Ritonavir	2	436.9	16	6990.4	0.424535291502708	0.708616780045351	0.506515876713683	0.540661304736372	1	1	1	-0.856760140048682	-0.34444040627039	-0.680199609854401	-0.614962250281084	0	0	0	-0.000554796935657798
46	Ritonavir	2	436.9	17	7427.3	0.409796333526696	0.695942654325284	0.491360949987331	0.525572809208383	1	1	1	-0.892094990199558	-0.362488015253024	-0.710576288907965	-0.64326654601069	0	0	0	-0.00290845102292475
46	Ritonavir	2	436.9	18	7864.2	0.396046447332043	0.683713934089977	0.477086547156764	0.511303612930488	1	1	1	-0.926223783363203	-0.380215673854714	-0.74005736397193	-0.670791710755516	0	0	0	-0.00532853339048084
46	Ritonavir	2	436.9	19	8301.1	0.383189306068464	0.671907545521736	0.463618094998094	0.497788748328705	1	1	1	-0.959226140194293	-0.397634528992976	-0.768694136789695	-0.69757949209898	0	0	0	-0.00780294623478867
46	Ritonavir	2	436.9	20	8738	0.371140698092839	0.660501981505945	0.450889210079809	0.48496993987976	1	1	1	-0.991174048125645	-0.414755155015257	-0.796533623582362	-0.723668369594832	0	0	0	-0.0103213445071755
46	Ritonavir	2	436.9	21	9174.9	0.359826680342453	0.649477170877444	0.438840604529691	0.472794764091042	1	1	1	-1.0221328069563	-0.431587592253736	-0.823619019470922	-0.749093887209093	0	0	0	-0.0128748594673706
46	Ritonavir	2	436.9	22	9611.8	0.349182059476735	0.638814360546825	0.427419162675435	0.461215932914046	1	1	1	-1.0521618324054	-0.448141382388601	-0.849990101642563	-0.77388894453598	0	0	0	-0.0154558710048482
46	Ritonavir	2	436.9	23	10048.7	0.3391491348639	0.628496009050343	0.416577158218037	0.45019067993675	1	1	1	-1.08131534248848	-0.464425600931674	-0.875683580707792	-0.798084052774551	0	0	0	-0.018057819156376
46	Ritonavir	2	436.9	24	10485.6	0.329676652218941	0.61850569025235	0.40627158760178	0.43968023255814	1	1	1	-1.10964294664114	-0.480448887107274	-0.900733408037927	-0.821707560462447	0	0	0	-0.0206750473164679
46	Ritonavir	2	436.9	25	10922.5	0.320718927827358	0.60882800608828	0.396463599944744	0.429649356413671	1	1	1	-1.13719015367119	-0.496219471376629	-0.925171045539475	-0.844785853155667	0	0	0	-0.0233026712187986
46	Ritonavir	2	436.9	26	11359.4	0.312235111767698	0.599448507373217	0.387118007596685	0.4200659607707	1	1	1	-1.16399881160096	-0.511745200825374	-0.949025703243412	-0.867343530581651	0	0	0	-0.0259364689847572
46	Ritonavir	2	436.9	27	11796.3	0.30418856505813	0.59035362181947	0.378202864326641	0.410900755581968	1	1	1	-1.19010749007343	-0.527033562610199	-0.972324549209937	-0.889403564248107	0	0	0	-0.028572788480351
46	Ritonavir	2	436.9	28	12233.2	0.296546330691999	0.581530588508956	0.369689100483301	0.402126952475906	1	1	1	-1.2155518140938	-0.542091705639989	-0.995092895531767	-0.910987438039258	0	0	0	-0.0312084689607314
46	Ritonavir	2	436.9	29	12670.1	0.289278682455363	0.572967398155045	0.361550206348167	0.393720003253884	1	1	1	-1.24036475635395	-0.556926460648654	-1.01735436362931	-0.932115273956664	0	0	0	-0.033840774561666
46	Ritonavir	2	436.9	30	13107	0.282358738501971	0.564652738565782	0.353761956414555	0.385657370517928	1	1	1	-1.26457689415867	-0.571544358800697	-1.03913103154412	-0.952805944849253	0	0	0	-0.0364673376559007
46	Ritonavir	2	436.9	31	13543.9	0.275762129095391	0.556575944787666	0.346302168551419	0.377918325915515	1	1	1	-1.28821663597583	-0.585951648956389	-1.06044356553325	-0.973077175715394	0	0	0	-0.0390861104570214
46	Ritonavir	2	436.9	32	13980.8	0.269466709862158	0.548726953467954	0.339150493009009	0.370483772198408	1	1	1	-1.31131042182085	-0.600154313710781	-1.08131133793046	-0.992945634939624	0	0	0	-0.0416953235449276
47	Saquinavir	2	334	1	334	0.91235896090265	0.976425748164879	0.954998652654271	0.891874393007446	0.983574309039048	1	1	-0.0917217688659988	-0.0238565703021394	-0.0460453493356259	-0.114429971331567	-0.0165620882989782	0	0	-0.0176757894081431
47	Saquinavir	2	334	2	668	0.838841978287093	0.95393738794649	0.913873130479629	0.804849547180835	0.967679504548094	1	1	-0.175732935561534	-0.0471572407710079	-0.0900635240776256	-0.217099916943171	-0.0328543368709473	0	0	-0.0324340232957052
47	Saquinavir	2	334	3	1002	0.776289350301406	0.932461579940685	0.876143386897404	0.733297844024488	0.95229025807066	1	1	-0.253229954199439	-0.0699273294489514	-0.13222551776762	-0.310203323986954	-0.0488853977298106	0	0	-0.0449419494726379
47	Saquinavir	2	334	4	1336	0.722418450031166	0.911931443638761	0.841405508072175	0.673429479344903	0.937382827146607	1	1	-0.325150737295248	-0.0921904631820478	-0.172681561528895	-0.395371996342384	-0.0646635133257221	0	0	-0.0556705775008196
47	Saquinavir	2	334	5	1670	0.675539149018846	0.892285861713106	0.809317195706782	0.622598870056497	0.922934933087217	1	1	-0.392244167644893	-0.113968724970017	-0.211564355076427	-0.473852835855015	-0.0801965419942766	0	0	-0.0649630940506328
47	Saquinavir	2	334	6	2004	0.634373289545703	0.873468872332365	0.779586449626045	0.578903130909855	0.90892564988184	1	1	-0.455117713038255	-0.135282785609828	-0.248991692687517	-0.546620119534096	-0.0954919814592207	0	0	-0.0730762976263991
47	Saquinavir	2	334	7	2338	0.597936371453138	0.855429136779619	0.751962656482071	0.54093854309837	0.895335303071	1	1	-0.514270932944904	-0.156152021600131	-0.285068615198759	-0.61444960529759	-0.110556990564644	0	0	-0.0802067511686577
47	Saquinavir	2	334	8	2672	0.565457798015938	0.838119471707258	0.726229508196721	0.50764695043302	0.882145377558222	1	1	-0.570119613945608	-0.176594620992099	-0.319889187122221	-0.67796905247639	-0.125398409394334	0	0	-0.0865078780970945
47	Saquinavir	2	334	9	3006	0.536325775104118	0.821496437054632	0.702199326332475	0.478215587571602	0.869338433452143	1	1	-0.623013513167134	-0.196627678635788	-0.353537974615291	-0.737693628145368	-0.140022777919828	0	0	-0.0921014805092246
47	Saquinavir	2	334	10	3340	0.510048408390788	0.805519972050774	0.679708477176832	0.452009844134536	0.856898029134533	1	1	-0.673249639354924	-0.2162672820719	-0.386091282768475	-0.794051320328357	-0.154436353304419	0	0	-0.0970857059959597
47	Saquinavir	2	334	11	3674	0.486225702698923	0.790153072880969	0.658613640587251	0.42852698708975	0.844808650840585	1	1	-0.721082354040535	-0.235528589150256	-0.417618197764448	-0.847401562554672	-0.168645125977711	0	0	-0.101540686808301
47	Saquinavir	2	334	12	4008	0.464529058116232	0.775361506557561	0.638788752703677	0.407363596037262	0.833055648117294	1	1	-0.766731164845867	-0.254425898313199	-0.448181469709751	-0.898049135987925	-0.182654834584075	0	0	-0.105532613977809
47	Saquinavir	2	334	13	4342	0.444686021230336	0.761113556338028	0.620122484689414	0.38819219388474	0.82162517459535	1	1	-0.810386816116653	-0.272972712360348	-0.477838264503939	-0.946254716937968	-0.196470979898374	0	0	-0.109116735004593
47	Saquinavir	2	334	14	4676	0.426468784496504	0.747379794705565	0.602516150969058	0.370744179787377	0.810504133571081	1	1	-0.852216104655049	-0.291181796407013	-0.506640807388969	-0.992242996570454	-0.210098837793401	0	0	-0.11233959600476
47	Saquinavir	2	334	15	5010	0.409685401201838	0.734132880492465	0.585881963960985	0.354797166773986	0.79968012794882	1	1	-0.892365727961815	-0.309065230659402	-0.534636936381943	-1.03620901399577	-0.223543471335537	0	0	-0.1152407437749
47	Saquinavir	2	334	16	5344	0.394172996258928	0.721347377203045	0.57014157014157	0.340165452525003	0.789141414141414	1	1	-0.930965389250905	-0.326634458553096	-0.561870580322512	-1.07832315466197	-0.236809742078024	0	0	-0.117854035353996
47	Saquinavir	2	334	17	5678	0.379792463134899	0.7089995899959	0.55522481591728	0.326692754654334	0.778876859568502	1	1	-0.96813032510075	-0.343900330735226	-0.588382173531086	-1.11873513798763	-0.249902320614901	0	0	-0.120208658014537
47	Saquinavir	2	334	18	6012	0.366424280746127	0.69706741912728	0.541068702290076	0.314246606592905	0.768875903429187	1	1	-1.0039633799659	-0.360873145313657	-0.614209016904326	-1.15757723000157	-0.262825696452914	0	0	-0.122329932666453
47	Saquinavir	2	334	19	6346	0.353965183752418	0.685530227948464	0.527616495459282	0.302713987473904	0.759128520458514	1	1	-1.03855672166701	-0.37756268474707	-0.639385593541893	-1.19496685499034	-0.275584187253644	0	0	-0.124239953208707
47	Saquinavir	2	334	20	6680	0.342325489809983	0.674368723798382	0.514816966879721	0.291997880233174	0.749625187406297	1	1	-1.07199326993164	-0.393978249706826	-0.663943845606458	-1.23100873621564	-0.288181947493432	0	0	-0.125958100171401
47	Saquinavir	2	334	21	7014	0.331426937374893	0.663564850345357	0.502623741313289	0.282014535776436	0.740356852002665	1	1	-1.10434789372362	-0.410128690204096	-0.687913417994069	-1.26579666406593	-0.300622976584581	0	0	-0.127501456992567
47	Saquinavir	2	334	22	7348	0.321200923787529	0.653101690114248	0.490994735383763	0.272691279817876	0.731314904197748	1	1	-1.13568842086283	-0.426022434243084	-0.711321873477762	-1.29941496684072	-0.312911126497556	0	0	-0.128885150131463
47	Saquinavir	2	334	23	7682	0.311587059772381	0.642963376092211	0.479891672308734	0.263964740825908	0.722491149483419	1	1	-1.16607649417784	-0.441667514232603	-0.734194883240509	-1.33193974223304	-0.325050108920519	0	0	-0.130122629052236
47	Saquinavir	2	334	24	8016	0.302531975985382	0.633135011441648	0.469279661016949	0.25577940766874	0.713877784123358	1	1	-1.1955683013609	-0.457071591363206	-0.756556396100365	-1.36343989476376	-0.337043501989505	0	0	-0.131225898327708
47	Saquinavir	2	334	25	8350	0.293988331783208	0.623602596465921	0.459126829900246	0.24808644754615	0.705467372134039	1	1	-1.22421520024326	-0.472241978135084	-0.778428789224882	-1.39397801474151	-0.34889475661977	0	0	-0.132205711311389
47	Saquinavir	2	334	26	8684	0.285913987336568	0.614352962074785	0.449404007101192	0.240842731007955	0.697252823873937	1	1	-1.25206425697314	-0.487185659202546	-0.799833002712601	-1.42361112693866	-0.360607202466337	0	0	-0.133071732729911
47	Saquinavir	2	334	27	9018	0.278271308523409	0.605373709084544	0.44008444058115	0.234010022933832	0.689227376111379	1	1	-1.27915871126119	-0.501909310683823	-0.820788660070573	-1.45239133149118	-0.372184053539503	0	0	-0.133832675964876
47	Saquinavir	2	334	28	9352	0.271026580403773	0.596653152764599	0.431143552311436	0.227554307425456	0.681384573453257	1	1	-1.30553838024148	-0.516419318069817	-0.841314176325254	-1.48036635512073	-0.38362841349899	0	0	-0.134496419586361
47	Saquinavir	2	334	29	9686	0.264149509990124	0.588180272108844	0.422558721831406	0.221445221445221	0.67371825102742	1	1	-1.33124001041755	-0.530721792852033	-0.86142685525944	-1.50758002732748	-0.394943280648582	0	0	-0.135070106772505
47	Saquinavir	2	334	30	10020	0.257612802845077	0.579944663368827	0.414309095160159	0.215655577299413	0.666222518321119	1	1	-1.35629758550142	-0.544822587978084	-0.881142977061882	-1.53407269348489	-0.406131552651325	0	0	-0.135560230530608
47	Saquinavir	2	334	31	10354	0.251391801026679	0.571936497436746	0.406375415663341	0.210160958120375	0.658891744086447	1	1	-1.38074259661685	-0.558727312232573	-0.900477877502014	-1.55988157461079	-0.417196030983863	0	0	-0.135972707073695
47	Saquinavir	2	334	32	10688	0.24546417225556	0.564146480711198	0.398739873987399	0.204939373651715	0.651720542231491	1	1	-1.40460428025676	-0.572441343631802	-0.919446019594494	-1.58504108186724	-0.428139425147037	0	0	-0.136312939264891
48	Sertindole	2	1.59	1	1.59	0.898011545862732	0.99965446726023	1	0.999790833233573	1	1	1	-0.107572353454427	-0.000345592449962522	0	-0.000209188644845539	0	0	0	0.0661339381167578
48	Sertindole	2	1.59	2	3.18	0.814901047729919	0.999309173223728	1	0.999581753950321	1	1	1	-0.204688586940851	-0.000691065507043447	0	-0.00041833353895391	0	0	0	0.125826914270631
48	Sertindole	2	1.59	3	4.77	0.745871070857752	0.998964117643226	1	0.999372762095369	1	1	1	-0.293202520983159	-0.00103641925370881	0	-0.00062743470062156	0	0	0	0.18022088533691
48	Sertindole	2	1.59	4	6.36	0.68762278978389	0.998619300271798	1	0.999163857613892	1	1	1	-0.374514862067063	-0.00138165377233826	0	-0.000836492148134158	0	0	0	0.230178689101581
48	Sertindole	2	1.59	5	7.95	0.637813211845103	0.998274720862857	1	0.998955040451107	1	1	1	-0.449709809905922	-0.00172676914522722	0	-0.00104550589976522	0	0	0	0.276368194590866
48	Sertindole	2	1.59	6	9.54	0.594732370433305	0.997930379170156	1	0.99874631055228	1	1	1	-0.519643772216872	-0.00207176545458489	0	-0.00125447597377697	0	0	0	0.319316950538129
48	Sertindole	2	1.59	7	11.13	0.557103064066852	0.997586274947789	1	0.998537667862722	1	1	1	-0.585005021940242	-0.00241664278253589	0	-0.00146340238842006	0	0	0	0.359448934341868
48	Sertindole	2	1.59	8	12.72	0.523952095808383	0.99724240795019	1	0.998329112327788	1	1	1	-0.646355019053186	-0.00276140121112033	0	-0.00167228516193411	0	0	0	0.39711000637968
48	Sertindole	2	1.59	9	14.31	0.49452490286118	0.996898777932129	1	0.998120643892881	1	1	1	-0.70415776950855	-0.00310604082229258	0	-0.00188112431254708	0	0	0	0.432585995169146
48	Sertindole	2	1.59	10	15.9	0.468227424749164	0.996555384648714	1	0.997912262503447	1	1	1	-0.758801150781382	-0.00345056169792322	0	-0.00208991985847551	0	0	0	0.4661158339441
48	Sertindole	2	1.59	11	17.49	0.444585582724674	0.996212227855393	1	0.997703968104979	1	1	1	-0.810612705497675	-0.0037949639197974	0	-0.00229867181792431	0	0	0	0.497901289559273
48	Sertindole	2	1.59	12	19.08	0.423216444981862	0.995869307307949	1	0.997495760643017	1	1	1	-0.859871540540232	-0.00413924756961677	0	-0.0025073802090872	0	0	0	0.528114292361618
48	Sertindole	2	1.59	13	20.67	0.403807326218633	0.9955266227625	1	0.997287640063144	1	1	1	-0.906817430081673	-0.00448341272899771	0	-0.00271604505014691	0	0	0	0.556902543675548
48	Sertindole	2	1.59	14	22.26	0.386100386100386	0.995184173975501	1	0.997079606310989	1	1	1	-0.951657875711446	-0.00482745947947254	0	-0.00292466635927408	0	0	0	0.584393864854293
48	Sertindole	2	1.59	15	23.85	0.369881109643329	0.994841960703743	1	0.996871659332227	1	1	1	-0.994573650268199	-0.00517138790249005	0	-0.00313324415462841	0	0	0	0.610699612290942
48	Sertindole	2	1.59	16	25.44	0.354969574036511	0.994499982704348	1	0.996663799072578	1	1	1	-1.03572320011918	-0.00551519807941423	0	-0.0033417784543579	0	0	0	0.635917389230728
48	Sertindole	2	1.59	17	27.03	0.341213746039483	0.994158239734776	1	0.996456025477807	1	1	1	-1.07524617683884	-0.005858890091526	0	-0.00355026927659984	0	0	0	0.660133221291619
48	Sertindole	2	1.59	18	28.62	0.328484279680901	0.993816731552817	1	0.996248338493725	1	1	1	-1.11326629705521	-0.00620246402002188	0	-0.00375871663947942	0	0	0	0.683423318134988
48	Sertindole	2	1.59	19	30.21	0.316670436552816	0.993475457916596	1	0.996040738066187	1	1	1	-1.14989367822289	-0.00654591994601449	0	-0.00396712056111105	0	0	0	0.705855512306106
48	Sertindole	2	1.59	20	31.8	0.305676855895196	0.993134418584568	1	0.995833224141094	1	1	1	-1.18522676150488	-0.00688925795053396	0	-0.00417548105959729	0	0	0	0.727490443732945
48	Sertindole	2	1.59	21	33.39	0.295420974889217	0.992793613315521	1	0.995625796664392	1	1	1	-1.21935390636424	-0.0072324781145259	0	-0.00438379815303018	0	0	0	0.74838254199759
48	Sertindole	2	1.59	22	34.98	0.285830951408738	0.992453041868573	1	0.995418455582071	1	1	1	-1.25235472190876	-0.00757558051885331	0	-0.00459207185948973	0	0	0	0.768580846447035
48	Sertindole	2	1.59	23	36.57	0.276843978643464	0.992112704003175	1	0.995211200840168	1	1	1	-1.28430118547663	-0.00791856524429545	0	-0.00480030219704491	0	0	0	0.788129695244016
48	Sertindole	2	1.59	24	38.16	0.26840490797546	0.991772599479104	1	0.995004032384763	1	1	1	-1.31525858800314	-0.00826143237154915	0	-0.00500848918375346	0	0	0	0.807069307714674
48	Sertindole	2	1.59	25	39.75	0.26046511627907	0.991432728056468	1	0.994796950161982	1	1	1	-1.34528633739251	-0.00860418198122771	0	-0.00521663283766158	0	0	0	0.825436279227099
48	Sertindole	2	1.59	26	41.34	0.252981568485725	0.991093089495706	1	0.994589954117995	1	1	1	-1.37443864474352	-0.00894681415386132	0	-0.00542473317680471	0	0	0	0.843264003907563
48	Sertindole	2	1.59	27	42.93	0.245916037238714	0.990753683557581	1	0.994383044199018	1	1	1	-1.40276511334773	-0.00928932896989852	0	-0.00563279021920655	0	0	0	0.860583037464553
48	Sertindole	2	1.59	28	44.52	0.239234449760766	0.990414510003187	1	0.99417622035131	1	1	1	-1.43031124653666	-0.00963172650970408	0	-0.0058408039828799	0	0	0	0.877421410023555
48	Sertindole	2	1.59	29	46.11	0.232906338379637	0.990075568593942	1	0.993969482521178	1	1	1	-1.45711888743581	-0.00997400685356098	0	-0.00604877448582569	0	0	0	0.89380489701635
48	Sertindole	2	1.59	30	47.7	0.226904376012966	0.989736859091594	1	0.993762830654968	1	1	1	-1.48322660129608	-0.0103161700816693	0	-0.0062567017460348	0	0	0	0.909757254697893
48	Sertindole	2	1.59	31	49.29	0.22120398167167	0.989398381258214	1	0.993556264699077	1	1	1	-1.50867000917196	-0.0106582162741469	0	-0.00646458578148572	0	0	0	0.925300425692673
48	Sertindole	2	1.59	32	50.88	0.215782983970407	0.989060134856199	1	0.993349784599941	1	1	1	-1.5334820801919	-0.0110001455110301	0	-0.00667242661014634	0	0	0	0.940454719033842
49	Sunitinib	2	19	1	19	0.974734042553192	0.998849809310491	1	0.999760861904043	0.999698962211836	1	0.999621043796966	-0.0255906220631883	-0.00115085266646868	0	-0.000239166694031144	-0.000301083109135212	0	-0.000379028025081831	0.0157437036609233
49	Sunitinib	2	19	2	38	0.950713359273671	0.997702261458459	1	0.999521838154799	0.999398105616625	1	0.999242374700738	-0.050542671676678	-0.00230038239344003	0	-0.000478276201031727	-0.00060207559451632	0	-0.000757912442349379	0.0310940423201501
49	Sunitinib	2	19	3	57	0.927848101265823	0.996557347345534	1	0.999282928670273	0.999097430050829	1	0.998863992385162	-0.0748872435744157	-0.00344859221893891	0	-0.00071732854834302	-0.000902977510681248	0	-0.00113665336058332	0.0460701703979011
49	Sunitinib	2	19	4	76	0.906056860321385	0.995415057915058	1	0.999044133368549	0.998796935351105	1	0.998485896524575	-0.0986532151718401	-0.00459548517053752	0	-0.000956323763287019	-0.0012037889121185	0	-0.00151525088844011	0.0606898764420677
49	Sunitinib	2	19	5	95	0.885265700483092	0.994275384151853	1	0.99880545216779	0.998496621354307	1	0.998108086793809	-0.121867452498608	-0.00574106426540307	0	-0.00119526187316581	-0.00150450985326702	0	-0.00189370513445315	0.0749697099831538
49	Sunitinib	2	19	6	114	0.865407319952775	0.993138317081979	1	0.998566884986234	0.998196487897485	1	0.997730562868186	-0.144554992765403	-0.00688533251034495	0	-0.00143414290526207	-0.00180514038851755	0	-0.0022720162070329	0.0889250939957698
49	Sunitinib	2	19	7	133	0.846420323325635	0.9920038477725	1	0.998328431742202	0.997896534817884	1	0.997353324423522	-0.166739206675784	-0.00802829290186301	0	-0.00167296688683861	-0.00210568057221122	0	-0.00265018421446636	0.102570424883032
49	Sunitinib	2	19	8	152	0.828248587570621	0.990871967331251	1	0.998090092354087	0.997596761952947	1	0.996976371136121	-0.188441943121278	-0.00916994842619409	0	-0.00191173384513948	-0.00240613045863983	0	-0.00302820926491791	0.115919161609011
49	Sunitinib	2	19	9	171	0.810840707964602	0.989742666906604	1	0.997851866740365	0.99729716914031	1	0.996599702682775	-0.209683658505525	-0.010310302059359	0	-0.00215044380738838	-0.00270649010204721	0	-0.00340609146642966	0.128983905362639
49	Sunitinib	2	19	10	190	0.794149512459372	0.988615937687238	1	0.997613754819587	0.996997756217805	1	0.996223318740767	-0.230483532616201	-0.0114493567672088	0	-0.0023890968007901	-0.00300675955662772	0	-0.00378383092692081	0.141776470935037
49	Sunitinib	2	19	11	209	0.778131634819533	0.987491770901909	1	0.997375756510384	0.996698523023458	1	0.995847218987866	-0.250859572689711	-0.0125871155054714	0	-0.00262769285252949	-0.00330693887652663	0	-0.00416142775418827	0.154307950823556
49	Sunitinib	2	19	12	228	0.762747138397503	0.986370157819225	1	0.997137871731462	0.99639946939549	1	0.995471403102327	-0.270828707083641	-0.0137235812197975	0	-0.00286623198977209	-0.00360702811584136	0	-0.00453888205590746	0.166588772934181
49	Sunitinib	2	19	13	247	0.747959183673469	0.985251089747417	1	0.996900100401606	0.996100595172316	1	0.995095870762892	-0.290406869777966	-0.0148587568458063	0	-0.00310471423966451	-0.00390702732861977	0	-0.00491619393963127	0.17862875263443
49	Sunitinib	2	19	14	266	0.733733733733734	0.984134558034117	1	0.996662442439679	0.995801900192544	1	0.994720621648786	-0.309609076761902	-0.0159926453091308	0	-0.00334313962933333	-0.00420693656886154	0	-0.00529336351279106	0.190437139807804
49	Sunitinib	2	19	15	285	0.720039292730845	0.98302055406613	1	0.99642489776462	0.995503384294978	1	0.994345655439718	-0.328449495223817	-0.0171252495254634	0	-0.00358150818588592	-0.00450675589051742	0	-0.00567039088269732	0.202022661474891
49	Sunitinib	2	19	16	304	0.706846673095468	0.981909069269222	1	0.996187466295446	0.995205047318612	1	0.99397097181588	-0.346941506342876	-0.0182565724006007	0	-0.00381981993641014	-0.00480648534749053	0	-0.00604727615653823	0.213393560473145
49	Sunitinib	2	19	17	323	0.694128787878788	0.980800095107888	1	0.995950147951251	0.994906889102635	1	0.993596570457946	-0.365097762379555	-0.0193866168304884	0	-0.00405807490797463	-0.00510612499363435	0	-0.00642401944138128	0.224557630624743
49	Sunitinib	2	19	18	342	0.681860465116279	0.979693623085144	1	0.995712942651207	0.994608909486428	1	0.993222451047072	-0.382930238675112	-0.0205153857012655	0	-0.00429627312762892	-0.00540567488275461	0	-0.00680062084417322	0.235522248768357
49	Sunitinib	2	19	19	361	0.670018281535649	0.978589644742305	1	0.99547585031456	0.994311108309564	1	0.992848613264891	-0.400450281095275	-0.0216428818893086	0	-0.00453441462240295	-0.00570513506860897	0	-0.00717708047173964	0.246294403984555
49	Sunitinib	2	19	20	380	0.658580413297394	0.977488151658768	1	0.995238870860637	0.994013485411809	1	0.992475056793519	-0.417668649388893	-0.0227691082612761	0	-0.00477249941930729	-0.00600450560490616	0	-0.00755339843078553	0.256880724304809
49	Sunitinib	2	19	21	399	0.647526501766785	0.976389135451802	1	0.995002004208839	0.993716040633121	1	0.992101781315546	-0.434595556876477	-0.0238940676741516	0	-0.00501052754533308	-0.00630378654530685	0	-0.00792957482789593	0.267287501159713
49	Sunitinib	2	19	22	418	0.636837532580365	0.975292587776333	1	0.994765250278644	0.993418773813647	1	0.991728786514044	-0.451240706835231	-0.025017762975288	0	-0.00524849902745287	-0.0066029779434241	0	-0.00830560976953505	0.277520711792226
49	Sunitinib	2	19	23	437	0.626495726495726	0.974198500324733	1	0.994528608989608	0.993121684793729	1	0.991356072072557	-0.46761332590515	-0.0261401970024494	0	-0.00548641389261931	-0.00690207985282223	0	-0.00868150336204729	0.287586039835893
49	Sunitinib	2	19	24	456	0.616484440706476	0.97310686482661	1	0.994292080261363	0.992824773413897	1	0.990983637675107	-0.48372219480413	-0.0272613725838558	0	-0.00572427216776606	-0.00720109232701749	0	-0.00905725571165745	0.297488894235407
49	Sunitinib	2	19	25	475	0.606788079470199	0.972017673048601	1	0.994055664013616	0.992528039514873	1	0.990611483006191	-0.499575676608109	-0.0283812925382249	0	-0.0059620738798075	-0.00750001541947893	0	-0.00943286692447008	0.307234426667234
49	Sunitinib	2	19	26	494	0.597392013039935	0.970930916794163	1	0.993819360166152	0.992231482937569	1	0.990239607750779	-0.51518174282426	-0.0294999596748147	0	-0.00619981905563858	-0.00779884918362675	0	-0.00980833710647061	0.316827547600742
49	Sunitinib	2	19	27	513	0.588282504012841	0.969846587903368	1	0.993583168638831	0.991935103523086	1	0.989868011594313	-0.530547997460747	-0.0306173767934656	0	-0.00643750772213582	-0.00809759367283337	0	-0.0101836663635251	0.326272941125218
49	Sunitinib	2	19	28	532	0.579446640316206	0.968764678252701	1	0.993347089351591	0.991638901112718	1	0.989496694222708	-0.545681699274969	-0.0317335466846434	0	-0.00667513990615581	-0.00839624894042425	0	-0.0105588548013804	0.335575078654829
49	Sunitinib	2	19	29	551	0.570872274143302	0.967685179754853	1	0.993111122224445	0.991342875547944	1	0.98912565532235	-0.560589782363255	-0.0328484721294796	0	-0.00691271563453635	-0.00869481503967618	0	-0.0109339025256639	0.344738231611911
49	Sunitinib	2	19	30	570	0.562547966231773	0.966608084358524	1	0.992875267177481	0.991047026670436	1	0.988754894580096	-0.575278875238194	-0.0339621558998144	0	-0.00715023493409583	-0.00899329202381839	0	-0.0113088096418854	0.35376648317864
49	Sunitinib	2	19	31	589	0.55446293494705	0.965533384048218	1	0.992639524130864	0.990751354322054	1	0.98838441168327	-0.58975531852498	-0.0350746007582369	0	-0.00738769783163417	-0.00929167994603303	0	-0.0116835762554347	0.362663739198012
49	Sunitinib	2	19	32	608	0.546607009694258	0.96446107084405	1	0.992403893004835	0.990455858344845	1	0.988014206319668	-0.604025181395027	-0.0361858094581273	0	-0.00762510435393161	-0.00958997885945401	0	-0.0120582024715839	0.371433738296984
50	Tolterodine	2	0.993	1	0.993	0.944811871283277	0.999936622386798	1	0.999084786722126	0.999987499054718	1	0.999921129427237	-0.0567694493141656	-6.33796216474201e-05	0	-0.000915632341253449	-1.25010234191803e-05	0	-7.88736832097418e-05	0.0344028016822628
50	Tolterodine	2	0.993	2	1.986	0.895396608026967	0.999873252806531	1	0.998171247143149	0.99997499842198	1	0.999842271294628	-0.110488521403391	-0.000126755226572928	0	-0.00183042706681194	-2.50018905646509e-05	0	-0.00015774114585242	0.0669270891242124
50	Tolterodine	2	0.993	3	2.979	0.850893438110015	0.999809891257672	1	0.99725937667609	0.999962498101773	1	0.999763425599229	-0.161468377861596	-0.000190126815285708	0	-0.00274438570776835	-3.75026014404772e-05	0	-0.000236602388908672	0.0977645374881987
50	Tolterodine	2	0.993	4	3.972	0.810604615678047	0.999746537738693	1	0.996349170750718	0.999949998094087	1	0.999684592338098	-0.20997487065407	-0.000253494388294901	0	-0.00365750979102043	-5.00031560503921e-05	0	-0.00031545741335983	0.127078911123783
50	Tolterodine	2	0.993	5	4.965	0.773958570452993	0.999683192248068	1	0.99544062481347	0.999937498398908	1	0.999605771508295	-0.256236933371527	-0.00031685794610905	0	-0.00456980083928759	-6.2503554398684e-05	0	-0.000394306220186479	0.155011232595813
50	Tolterodine	2	0.993	6	5.958	0.74048262043732	0.999619854784272	1	0.994533734327378	0.999924999016226	1	0.999526963106878	-0.300453115587089	-0.000380217489237098	0	-0.00548126037112526	-7.50037964887535e-05	0	-0.000473148810368791	0.181683807860458
50	Tolterodine	2	0.993	7	6.951	0.709782472548119	0.999556525345779	1	0.993628494771992	0.999912499946028	1	0.999448167130908	-0.342796732582493	-0.000443573018187726	0	-0.00639188990094079	-8.7503882324668e-05	0	-0.000551985184887075	0.20720339850611
50	Tolterodine	2	0.993	8	7.944	0.681526619627967	0.999493203931064	1	0.992724901643308	0.999900001188304	1	0.999369383577448	-0.383419968259205	-0.000506924533469569	0	-0.00730169093900753	-0.000100003811910384	0	-0.000630815344721672	0.231663749154237
50	Tolterodine	2	0.993	9	8.937	0.655434321625477	0.999429890538601	1	0.991822950453686	0.999887502743041	1	0.999290612443559	-0.422457176640461	-0.000570272035591219	0	-0.00821066499148059	-0.000112503585249859	0	-0.000709639290851729	0.255147621190776
50	Tolterodine	2	0.993	10	9.93	0.631266245822503	0.999366585166866	1	0.990922636731784	0.999875004610228	1	0.999211853726306	-0.460027562767291	-0.000633615525061115	0	-0.00911881356041207	-0.000125003202346938	0	-0.000788457024256975	0.277728444203039
50	Tolterodine	2	0.993	11	10.923	0.60881710417935	0.999303287814336	1	0.990023956022478	0.999862506789852	1	0.999133107422752	-0.496237377922367	-0.000696955002387652	0	-0.0100261381437651	-0.000137502663205581	0	-0.000867268545916949	0.299471668241688
50	Tolterodine	2	0.993	12	11.916	0.58790980771891	0.999239998479487	1	0.989126903886794	0.999850009281903	1	0.999054373529963	-0.531181731081835	-0.000760290468078625	0	-0.0109326402354289	-0.000150001967829635	0	-0.000946073856810324	0.32043587967841
50	Tolterodine	2	0.993	13	12.909	0.568390785382326	0.999176717160795	1	0.98823147590183	0.999837512086368	1	0.998975652045005	-0.564946094392488	-0.000823621922642453	0	-0.0118383213252344	-0.00016250111622328	0	-0.00102487295791592	0.340673728582645
50	Tolterodine	2	0.993	14	13.902	0.550126205423597	0.999113443856737	1	0.987337667660684	0.999825015203236	1	0.998896942964945	-0.59760756267201	-0.000886949366587177	0	-0.0127431828989678	-0.000175000108389809	0	-0.00110366585021268	0.360232704576071
50	Tolterodine	2	0.993	15	14.895	0.532998902649318	0.999050178565792	1	0.986445474772385	0.999812518632495	1	0.998818246286852	-0.629235913637702	-0.000950272800420575	0	-0.0136472264383857	-0.000187498944333627	0	-0.00118245253467847	0.379155789935453
50	Tolterodine	2	0.993	16	15.888	0.516905862320603	0.998986921286437	1	0.985554892861819	0.999800022374133	1	0.998739562007794	-0.659894505539361	-0.00101359222465071	0	-0.0145504534212292	-0.000199997624058472	0	-0.00126123301229165	0.39748201253616
50	Tolterodine	2	0.993	17	16.881	0.501756146512795	0.998923672017149	1	0.984665917569656	0.999787526428139	1	0.998660890124841	-0.689641041230658	-0.00107690763978527	0	-0.0154528653212399	-0.000212496147568192	0	-0.00134000728403023	0.415246916521544
50	Tolterodine	2	0.993	18	17.874	0.487469174743362	0.998860430756409	1	0.983778544552281	0.999775030794501	1	0.998582230635064	-0.718528221839086	-0.0011402190463319	0	-0.0163544636081722	-0.000224994514866861	0	-0.00141877535087151	0.432482964964831
50	Tolterodine	2	0.993	19	18.867	0.473973290211058	0.998797197502695	1	0.982892769481724	0.999762535473207	1	0.998503583535536	-0.74660430864047	-0.00120352644479798	0	-0.017255249747809	-0.000237492725958328	0	-0.00149753721379323	0.449219885984856
50	Tolterodine	2	0.993	20	19.86	0.461204557786218	0.998733972254486	1	0.982008588045586	0.999750040464245	1	0.998424948823328	-0.773913608185461	-0.00126682983569105	0	-0.0181552252019761	-0.000249990780846334	0	-0.0015762928737725	0.465484971584874
50	Tolterodine	2	0.993	21	20.853	0.449105751195414	0.998670755010262	1	0.981125995946972	0.999737545767604	1	0.998346326495514	-0.800496892924096	-0.00133012921951853	0	-0.0190543914285555	-0.000262488679535285	0	-0.00165504233178613	0.481303336758064
50	Tolterodine	2	0.993	22	21.846	0.437625495546517	0.998607545768503	1	0.980244988904422	0.999725051383272	1	0.998267716549169	-0.826391767353725	-0.00139342459678755	0	-0.0199527498815004	-0.000274986422028366	0	-0.00173378558881083	0.496698145035318
50	Tolterodine	2	0.993	23	22.839	0.426717538090816	0.998544344527691	1	0.97936556265184	0.999712557311238	1	0.998189118981369	-0.851632987943555	-0.00145671596800529	0	-0.0208503020108483	-0.000287484008329875	0	-0.00181252264582356	0.511690805559354
50	Tolterodine	2	0.993	24	23.832	0.41634012539185	0.998481151286305	1	0.978487712938424	0.999700063551489	1	0.998110533789189	-0.876252743666109	-0.00152000333367904	0	-0.0217470492627372	-0.000299981438443663	0	-0.00189125350379987	0.5263011458926
50	Tolterodine	2	0.993	25	24.825	0.406455469216976	0.998417966042828	1	0.9776114355286	0.999687570104014	1	0.998031960969707	-0.900280902816671	-0.00158328669431567	0	-0.0226429930794167	-0.000312478712373694	0	-0.00196997816371621	0.540547564058425
50	Tolterodine	2	0.993	26	25.818	0.397029286748564	0.998354788795741	1	0.976736726201954	0.999675076968802	1	0.997953400520002	-0.923745230868315	-0.00164656605042181	0	-0.023538134899264	-0.000324975830123823	0	-0.00204869662654863	0.554447162740231
50	Tolterodine	2	0.993	27	26.811	0.388030403323366	0.998291619543526	1	0.975863580753161	0.99966258414584	1	0.997874852437152	-0.946671583347935	-0.00170984140250448	0	-0.0244324761567972	-0.000337472791697904	0	-0.00212740889327217	0.568015868093441
50	Tolterodine	2	0.993	28	27.804	0.379430407999286	0.998228458284665	1	0.974991994991923	0.999650091635116	1	0.997796316718237	-0.969084077093277	-0.00177311275107021	0	-0.0253260182826886	-0.000349969597099901	0	-0.00220611496486236	0.581268535240136
50	Tolterodine	2	0.993	29	28.797	0.37120335393148	0.998165305017643	1	0.974121964742895	0.99963759943662	1	0.997717793360339	-0.991005242735155	-0.00183638009662571	0	-0.0262187627037792	-0.00036246624633378	0	-0.00228481484229454	0.594219042198378
50	Tolterodine	2	0.993	30	29.79	0.363325496901047	0.998102159740941	1	0.973253485845626	0.999625107550339	1	0.997639282360539	-1.01245616082191	-0.00189964343967741	0	-0.0271107108430914	-0.000374962739403508	0	-0.00236350852654327	0.606880373735115
50	Tolterodine	2	0.993	31	30.783	0.355775066446226	0.998039022453043	1	0.972386554154486	0.999612615976262	1	0.997560783715921	-1.03345658364769	-0.00196290278073171	0	-0.0280018641198442	-0.000387459076312608	0	-0.00244219601858326	0.619264696412632
50	Tolterodine	2	0.993	32	31.776	0.348532064949975	0.997975893152434	1	0.971521165538603	0.999600124714377	1	0.997482297423568	-1.0540250445493	-0.00202615812029519	0	-0.0288922239494647	-0.000399955257065269	0	-0.00252087731938935	0.631383425915588
51	Tamoxifen	2	19.5	1	19.5	0.985221674876847	1	1	1	1	1	1	-0.0148886124937505	0	0	0	0	0	0	0.0091714129561389
51	Tamoxifen	2	19.5	2	39	0.970873786407767	1	1	1	1	1	1	-0.0295588022415444	0	0	0	0	0	0	0.0182082770949838
51	Tamoxifen	2	19.5	3	58.5	0.956937799043062	1	1	1	1	1	1	-0.0440168854167742	0	0	0	0	0	0	0.0271144831910788
51	Tamoxifen	2	19.5	4	78	0.943396226415094	1	1	1	1	1	1	-0.0582689081239759	0	0	0	0	0	0	0.0358937556560503
51	Tamoxifen	2	19.5	5	97.5	0.930232558139535	1	1	1	1	1	1	-0.0723206615796261	0	0	0	0	0	0	0.044549661890007
51	Tamoxifen	2	19.5	6	117	0.91743119266055	1	1	1	1	1	1	-0.0861776962410524	0	0	0	0	0	0	0.0530856209849739
51	Tamoxifen	2	19.5	7	136.5	0.904977375565611	1	1	1	1	1	1	-0.0998453349697161	0	0	0	0	0	0	0.0615049118335007
51	Tamoxifen	2	19.5	8	156	0.892857142857143	1	1	1	1	1	1	-0.113328685307003	0	0	0	0	0	0	0.0698106806905691
51	Tamoxifen	2	19.5	9	175.5	0.881057268722467	1	1	1	1	1	1	-0.126632650933366	0	0	0	0	0	0	0.0780059482324484
51	Tamoxifen	2	19.5	10	195	0.869565217391304	1	1	1	1	1	1	-0.139761942375159	0	0	0	0	0	0	0.0860936161521235
51	Tamoxifen	2	19.5	11	214.5	0.858369098712446	1	1	1	1	1	1	-0.152721087017664	0	0	0	0	0	0	0.0940764733273397
51	Tamoxifen	2	19.5	12	234	0.847457627118644	1	1	1	1	1	1	-0.165514438477573	0	0	0	0	0	0	0.101957201594067
51	Tamoxifen	2	19.5	13	253.5	0.836820083682008	1	1	1	1	1	1	-0.178146185383474	0	0	0	0	0	0	0.109738381155297
51	Tamoxifen	2	19.5	14	273	0.826446280991736	1	1	1	1	1	1	-0.19062035960865	0	0	0	0	0	0	0.117422495652463
51	Tamoxifen	2	19.5	15	292.5	0.816326530612245	1	1	1	1	1	1	-0.20294084399669	0	0	0	0	0	0	0.125011936924429
51	Tamoxifen	2	19.5	16	312	0.806451612903226	1	1	1	1	1	1	-0.215111379616945	0	0	0	0	0	0	0.132509009476865
51	Tamoxifen	2	19.5	17	331.5	0.796812749003984	1	1	1	1	1	1	-0.227135572583747	0	0	0	0	0	0	0.1399159346829
51	Tamoxifen	2	19.5	18	351	0.78740157480315	1	1	1	1	1	1	-0.2390169004705	0	0	0	0	0	0	0.14723485473421
51	Tamoxifen	2	19.5	19	370.5	0.778210116731518	1	1	1	1	1	1	-0.250758718347183	0	0	0	0	0	0	0.154467836360137
51	Tamoxifen	2	19.5	20	390	0.769230769230769	1	1	1	1	1	1	-0.262364264467491	0	0	0	0	0	0	0.161616874330971
51	Tamoxifen	2	19.5	21	409.5	0.760456273764259	1	1	1	1	1	1	-0.273836665629728	0	0	0	0	0	0	0.168683894760277
51	Tamoxifen	2	19.5	22	429	0.75187969924812	1	1	1	1	1	1	-0.285178942233662	0	0	0	0	0	0	0.175670758219924
51	Tamoxifen	2	19.5	23	448.5	0.743494423791822	1	1	1	1	1	1	-0.296394013053802	0	0	0	0	0	0	0.182579262680432
51	Tamoxifen	2	19.5	24	468	0.735294117647059	1	1	1	1	1	1	-0.307484699747961	0	0	0	0	0	0	0.189411146288255
51	Tamoxifen	2	19.5	25	487.5	0.727272727272727	1	1	1	1	1	1	-0.318453731118535	0	0	0	0	0	0	0.196168089990739
51	Tamoxifen	2	19.5	26	507	0.719424460431655	1	1	1	1	1	1	-0.3293037471426	0	0	0	0	0	0	0.202851720018668
51	Tamoxifen	2	19.5	27	526.5	0.711743772241993	1	1	1	1	1	1	-0.340037302785709	0	0	0	0	0	0	0.209463610235568
51	Tamoxifen	2	19.5	28	546	0.704225352112676	1	1	1	1	1	1	-0.350656871613169	0	0	0	0	0	0	0.216005284362265
51	Tamoxifen	2	19.5	29	565.5	0.696864111498258	1	1	1	1	1	1	-0.361164849211585	0	0	0	0	0	0	0.222478218084556
51	Tamoxifen	2	19.5	30	585	0.689655172413793	1	1	1	1	1	1	-0.371563556432483	0	0	0	0	0	0	0.228883841051295
51	Tamoxifen	2	19.5	31	604.5	0.68259385665529	1	1	1	1	1	1	-0.381855242469031	0	0	0	0	0	0	0.23522353876965
51	Tamoxifen	2	19.5	32	624	0.675675675675676	1	1	1	1	1	1	-0.392042087776024	0	0	0	0	0	0	0.241498654403827
52	Amitriptyline	3	36.4	1	36.4	0.990152580889514	0.993720240149058	0.991855730075625	0.99687188477536	0.986875315497224	1	0.985888191052183	-0.00989622561847336	-0.00629956048183229	-0.00817761566523212	-0.00313301800404489	-0.0132115742790848	0	-0.0142123273081712	0.00808758690794386
52	Amitriptyline	3	36.4	2	72.8	0.980497213887698	0.987518858867096	0.983843046739758	0.993763278733466	0.974090682610862	1	0.972169126079975	-0.0196954748717535	-0.0125596848022836	-0.0162888999979888	-0.00625625085535666	-0.0262508763768719	0	-0.0282254916329325	0.0160615231151059
52	Amitriptyline	3	36.4	3	109.2	0.971028334925183	0.981394397873645	0.975958786491128	0.990673999931678	0.961633054599115	1	0.95882663449212	-0.0293996299371892	-0.018780863643375	-0.0243349204164394	-0.0093697594863493	-0.0391223412088806	0	-0.042044997821379	0.0239246106614691
52	Amitriptyline	3	36.4	4	145.6	0.961740592810595	0.975345434841506	0.968199886428166	0.987603868682741	0.949490043710539	1	0.945845421408912	-0.0390105187226598	-0.0249635785857972	-0.0323167187785891	-0.0124736042620608	-0.0518302346083234	0	-0.0556761255980327	0.0316795512360083
52	Amitriptyline	3	36.4	5	182	0.952628839146278	0.969370582295523	0.96056338028169	0.984552707519946	0.937649880095923	1	0.933211009174312	-0.04852991693309	-0.0311083023326161	-0.040235312191899	-0.0155678449871766	-0.0643786618134357	0	-0.0691239416752247	0.0393289509222999
52	Amitriptyline	3	36.4	6	218.4	0.943688118811881	0.963468486551586	0.953046394633874	0.981520341162932	0.926101373756513	1	0.92090968349388	-0.0579595500395287	-0.0372154989261433	-0.048091693791102	-0.0186525409129423	-0.0767715754288545	0	-0.0823933110599323	0.0468753246648268
52	Amitriptyline	3	36.4	7	254.8	0.93491366097885	0.957637826694154	0.945646145313367	0.978506596484125	0.914833879270005	1	0.908928443777254	-0.0673010951562525	-0.0432856239582281	-0.0558868334857001	-0.0217277507439725	-0.0890127828996815	0	-0.0954889076202105	0.0543211004756415
52	Amitriptyline	3	36.4	8	291.2	0.926300870621583	0.951877313590693	0.938359933957072	0.97551130247578	0.903837263060564	1	0.897254957307177	-0.0765561828310032	-0.0493191247742014	-0.063621678678554	-0.024793532644954	-0.101105953533593	0	-0.10841522396865	0.0616686233994277
52	Amitriptyline	3	36.4	9	327.6	0.91784532049353	0.946185688941455	0.931185144729656	0.972534290217646	0.893101873001371	1	0.885877516895422	-0.0857263987531368	-0.0553164406707077	-0.0712971549568936	-0.0278499442472462	-0.113054625103397	0	-0.12117658071516	0.0689201592535543
52	Amitriptyline	3	36.4	10	364	0.909542743538767	0.940561724363161	0.924119241192412	0.969575392845202	0.882618510158014	1	0.874785001719986	-0.0948132853841632	-0.0612780030876376	-0.0789141667570104	-0.0308970426553827	-0.12486221005977	0	-0.133777135136756	0.0760778981583871
52	Amitriptyline	3	36.4	11	400.4	0.901389025711753	0.935004220505162	0.917159763313609	0.966634445518483	0.872378402498884	1	0.863966841068152	-0.103818343514864	-0.0672042357943736	-0.0864735980038268	-0.0339348844534715	-0.136532001381461	0	-0.146220889307893	0.0831439578719188
52	Amitriptyline	3	36.4	12	436.8	0.893380199179848	0.929512006196747	0.91030432461292	0.963711285391466	0.862373180414645	1	0.853412980736962	-0.112743033752929	-0.0730955550705508	-0.0939763127264715	-0.036963525711501	-0.148067178088063	0	-0.158511697731119	0.0901203869416898
52	Amitriptyline	3	36.4	13	473.2	0.885512435885029	0.924083937624334	0.903550609432962	0.960805751582016	0.852594853903184	1	0.843113851866587	-0.121588777944788	-0.0789523698815224	-0.101423155650933	-0.0399830219915493	-0.159470810438438	0	-0.170653274504465	0.0970091676859614
52	Amitriptyline	3	36.4	14	509.6	0.877782041442824	0.918718897537323	0.896896370331404	0.957917685142366	0.843035791289349	1	0.833060342003538	-0.130356960535114	-0.0847750820487179	-0.108814952770812	-0.0429934283538994	-0.170745864836065	0	-0.182649200058902	0.103812219015207
52	Amitriptyline	3	36.4	15	546	0.87018544935806	0.913415794481446	0.890339425587467	0.955046929030133	0.833688699360341	1	0.823243768209777	-0.139048929867233	-0.0905640864150692	-0.116152511897129	-0.0459947993630647	-0.181895208460914	0	-0.194502927496462	0.11053139910414
52	Amitriptyline	3	36.4	16	582.4	0.862719215538374	0.908173562058527	0.883877656817004	0.952193328079853	0.824546604808098	1	0.813655852050938	-0.147665999427508	-0.0963197710056772	-0.123436623188112	-0.0489871890937222	-0.192921613645939	0	-0.206217788557081	0.117168507923746
52	Amitriptyline	3	36.4	17	618.8	0.855380013087782	0.902991158211576	0.877509006690684	0.949356728975022	0.815602836879433	1	0.804288696312227	-0.156209449036564	-0.10204251718388	-0.130668059659823	-0.0519706511365591	-0.203827762014918	0	-0.217796999239968	0.123725289642089
52	Amitriptyline	3	36.4	18	655.2	0.848164627363737	0.897867564534231	0.871231476750128	0.946536980220641	0.806851011143211	1	0.795134763304359	-0.164680525990054	-0.107732699802882	-0.137847577678459	-0.0549452386040305	-0.21461624839706	0	-0.229243665103222	0.130203434902017
52	Amitriptyline	3	36.4	19	691.6	0.841069951282287	0.892801785603571	0.865043125317098	0.943733932116242	0.798285014291548	1	0.786186854634267	-0.173080446151516	-0.11339068735309	-0.144975917435103	-0.0579110041360331	-0.225289584532702	0	-0.240560786263558	0.136604582983318
52	Amitriptyline	3	36.4	20	728	0.834092980856882	0.887792848335388	0.858942065491184	0.940947436729397	0.78989898989899	1	0.777438092326506	-0.181410394999709	-0.119016842105312	-0.152053803403674	-0.0608679999054956	-0.235850202583325	0	-0.251751262116264	0.142930323856324
52	Amitriptyline	3	36.4	21	764.4	0.827230810957418	0.882839801361045	0.852926463231616	0.93817734786969	0.781687325069972	1	0.768881901191268	-0.189671528632687	-0.124611520249938	-0.159081944782783	-0.0638162776238839	-0.246300458458153	0	-0.262817895793976	0.149182200133488
52	Amitriptyline	3	36.4	22	800.8	0.820480631276901	0.87794171442507	0.846994535519126	0.935423521063157	0.773644637910566	1	0.76051199234404	-0.197864974730738	-0.130175072032264	-0.166061035922174	-0.0667558885466286	-0.256642634968728	0	-0.273763398381426	0.155361708924981
52	Amitriptyline	3	36.4	23	837.2	0.813839722493996	0.873097677802704	0.841144548593981	0.93268581352716	0.765765765765766	1	0.752322347790072	-0.205991833480193	-0.13570784188406	-0.172991756734383	-0.0696868834784708	-0.266878944822018	0	-0.284590392902008	0.161470303603965
52	Amitriptyline	3	36.4	24	873.6	0.807305452620434	0.868306801736614	0.835374816266536	0.929964084145716	0.758045754168282	1	0.744307205994263	-0.214053178459998	-0.141210168551523	-0.179874773092228	-0.072609312778731	-0.277011533461879	0	-0.295301418090838	0.167509395486778
52	Amitriptyline	3	36.4	25	910	0.800875273522976	0.863568215892054	0.829683698296837	0.927258193445244	0.750479846449136	1	0.736461048363742	-0.222050057492838	-0.146682385219733	-0.186710737212718	-0.0755232263665009	-0.287042481768001	0	-0.305898931967873	0.17348035543295
52	Amitriptyline	3	36.4	26	946.4	0.794546717610281	0.858881068829775	0.824069598840019	0.924568003570746	0.743063473964272	1	0.728778586576489	-0.2299834934625	-0.152124819633711	-0.193500288027926	-0.0784286737257587	-0.296973808620827	0	-0.316385315223682	0.179384515369609
52	Amitriptyline	3	36.4	27	982.8	0.788317394675627	0.854244527495996	0.818530964954393	0.92189337826239	0.735792246894994	1	0.721254750694878	-0.237854485099056	-0.157537794216216	-0.200244051543355	-0.0813257039104131	-0.306807473340347	0	-0.326762874429523	0.185223169744553
52	Amitriptyline	3	36.4	28	1019.2	0.782184988886989	0.849657776728818	0.813066285169289	0.919234182832509	0.728661945583302	1	0.713884678007973	-0.245664007733404	-0.162921626182358	-0.206942641184303	-0.0842143655492704	-0.316545378006158	0	-0.337033845082565	0.190997576911979
52	Amitriptyline	3	36.4	29	1055.6	0.776147255916532	0.845120018780445	0.807674088109901	0.916590284142988	0.721668512366187	1	0.706663702550992	-0.25341301402256	-0.168276627651147	-0.213596658130703	-0.0870947068509337	-0.326189369665629	0	-0.347200394496299	0.196708960454584
52	Amitriptyline	3	36.4	30	1092	0.77020202020202	0.840630472854641	0.802352941176471	0.913961550583044	0.714808043875686	1	0.699587345254471	-0.261102434647069	-0.173603105754073	-0.2202066916409	-0.0899667756086302	-0.335741242436615	0	-0.3572646245455	0.202358510445552
52	Amitriptyline	3	36.4	31	1128.4	0.764347172333138	0.836188374658847	0.797101449275362	0.91134785204739	0.708076783773995	1	0.692651304679414	-0.268733178981803	-0.178901362740807	-0.226773319364788	-0.0928306192049688	-0.345202739510688	0	-0.36722857427443	0.207947384653671
52	Amitriptyline	3	36.4	32	1164.8	0.758580666556127	0.831792975970425	0.791918253599628	0.908749059914766	0.701471115895228	1	0.685851448298182	-0.276306135741365	-0.184171696082116	-0.233297107646746	-0.0956862846166316	-0.354575555062482	0	-0.377094222376372	0.213476709694654
53	Diphenhydramine	3	34	1	34	0.985525755640698	0.999171418823415	1	0.999850899427278	1	1	1	-0.0145800181385784	-0.000828924639706161	0	-0.000149111689317062	0	0	0	0.00888806033099942
53	Diphenhydramine	3	34	2	68	0.971464540495174	0.998344209603584	1	0.99970184330989	1	1	1	-0.0289505105784077	-0.00165716273241054	0	-0.000298201147652932	0	0	0	0.0176470663460878
53	Diphenhydramine	3	34	3	102	0.957798924286305	0.997518368935818	1	0.999552831627956	1	1	1	-0.0431174141831486	-0.0024847154144207	0	-0.000447268381635734	0	0	0	0.0262806751601644
53	Diphenhydramine	3	34	4	136	0.944512443900449	0.996693893426682	1	0.999403864361609	1	1	1	-0.0570864170077781	-0.00331158381922584	0	-0.000596313397890265	0	0	0	0.0347923906215188
53	Diphenhydramine	3	34	5	170	0.93158953722334	0.995870779693952	1	0.999254941490994	1	1	1	-0.0708629720103947	-0.00413776907750554	0	-0.000745336203038103	0	0	0	0.043185571758329
53	Diphenhydramine	3	34	6	204	0.91901548233426	0.995049024366566	1	0.999106062996266	1	1	1	-0.0844523098322758	-0.00496327231713912	0	-0.000894336803698593	0	0	0	0.0514634406511994
53	Diphenhydramine	3	34	7	238	0.90677634155895	0.994228624084582	1	0.998957228857596	1	1	1	-0.0978594507211494	-0.00578809466321542	0	-0.00104331520648751	0	0	0	0.0596290897779194
53	Diphenhydramine	3	34	8	272	0.894858909934287	0.993409575499128	1	0.998808439055162	1	1	1	-0.111089215665695	-0.00661223723804094	0	-0.00119227141801774	0	0	0	0.0676854888723358
53	Diphenhydramine	3	34	9	306	0.88325066768409	0.992591875272357	1	0.998659693569157	1	1	1	-0.124146236803072	-0.0074357011611504	0	-0.00134120544489977	0	0	0	0.0756354913354107
53	Diphenhydramine	3	34	10	340	0.871939736346516	0.991775520077407	1	0.998510992379784	1	1	1	-0.137034967155705	-0.00825848754931439	0	-0.00149011729374041	0	0	0	0.0834818402330977
53	Diphenhydramine	3	34	11	374	0.860914838229825	0.990960506598347	1	0.99836233546726	1	1	1	-0.14975968974853	-0.00908059751654971	0	-0.00163900697114377	0	0	0	0.0912271739125848
53	Diphenhydramine	3	34	12	408	0.850165258905619	0.990146831530139	1	0.99821372281181	1	1	1	-0.162324526153425	-0.00990203217412762	0	-0.00178787448371122	0	0	0	0.0988740312656762
53	Diphenhydramine	3	34	13	442	0.83968081247733	0.989334491578592	1	0.998065154393675	1	1	1	-0.174733444503462	-0.0107227926305831	0	-0.00193671983804087	0	0	0	0.10642485666559
53	Diphenhydramine	3	34	14	476	0.829451809387316	0.988523483460314	1	0.997916630193106	1	1	1	-0.186990267015988	-0.0115428799917239	0	-0.00208554304072832	0	0	0	0.113882004601188
53	Diphenhydramine	3	34	15	510	0.819469026548673	0.987713803902674	1	0.997768150190364	1	1	1	-0.199098677060207	-0.0123622953606396	0	-0.00223434409836576	0	0	0	0.12124774403062
53	Diphenhydramine	3	34	16	544	0.809723679608255	0.986905449643751	1	0.997619714365724	1	1	1	-0.211062225801977	-0.0131810398377101	0	-0.00238312301754242	0	0	0	0.128524262474531
53	Diphenhydramine	3	34	17	578	0.800207397165572	0.986098417432296	1	0.997471322699472	1	1	1	-0.222884338455801	-0.0139991145206147	0	-0.00253187980484523	0	0	0	0.135713669867298
53	Diphenhydramine	3	34	18	612	0.790912196788521	0.985292704027684	1	0.997322975171907	1	1	1	-0.234568320171551	-0.014816520504341	0	-0.00268061446685746	0	0	0	0.142818002183266
53	Diphenhydramine	3	34	19	646	0.781830462681526	0.984488306199875	1	0.997174671763337	1	1	1	-0.246117361581257	-0.0156332588811938	0	-0.00282932701015961	0	0	0	0.149839224853576
53	Diphenhydramine	3	34	20	680	0.772954924874791	0.983685220729367	1	0.997026412454084	1	1	1	-0.257534544029215	-0.0164493307408037	0	-0.00297801744132978	0	0	0	0.156779235987925
53	Diphenhydramine	3	34	21	714	0.76427863981512	0.982883444407153	1	0.996878197224481	1	1	1	-0.268822844506903	-0.0172647371701355	0	-0.00312668576694247	0	0	0	0.163639869414483
53	Diphenhydramine	3	34	22	748	0.755794972249429	0.982082974034684	1	0.996730026054873	1	1	1	-0.279985140312441	-0.0180794792534975	0	-0.00327533199356919	0	0	0	0.170422897550128
53	Diphenhydramine	3	34	23	782	0.747497578301582	0.981283806423819	1	0.996581898925615	1	1	1	-0.291024213452868	-0.0188935580725498	0	-0.00342395612777945	0	0	0	0.177130034112254
53	Diphenhydramine	3	34	24	816	0.739380389651868	0.980485938396786	1	0.996433815817076	1	1	1	-0.301942754806071	-0.019706974706313	0	-0.00357255817613882	0	0	0	0.183762936682534
53	Diphenhydramine	3	34	25	850	0.731437598736177	0.979689366786141	1	0.996285776709635	1	1	1	-0.312743368057942	-0.0205197302311766	0	-0.0037211381452102	0	0	0	0.190323209132208
53	Diphenhydramine	3	34	26	884	0.723663644889028	0.978894088434724	1	0.996137781583684	1	1	1	-0.323428573429184	-0.0213318257209078	0	-0.00386969604155423	0	0	0	0.196812403917809
53	Diphenhydramine	3	34	27	918	0.716053201360965	0.97810010019562	1	0.995989830419626	1	1	1	-0.334000811205099	-0.0221432622466602	0	-0.00401823187172759	0	0	0	0.203232024255516
53	Diphenhydramine	3	34	28	952	0.708601163146618	0.977307398932113	1	0.995841923197876	1	1	1	-0.344462445080736	-0.0229540408769816	0	-0.00416674564228462	0	0	0	0.209583526181771
53	Diphenhydramine	3	34	29	986	0.70130263556498	0.976515981517649	1	0.995694059898858	1	1	1	-0.354815765332859	-0.0237641626778229	0	-0.00431523735977691	0	0	0	0.215868320507218
53	Diphenhydramine	3	34	30	1020	0.694152923538231	0.975725844835792	1	0.995546240503013	1	1	1	-0.36506299182939	-0.0245736287125465	0	-0.00446370703075267	0	0	0	0.222087774670527
53	Diphenhydramine	3	34	31	1054	0.687147521519739	0.974936985780187	1	0.995398464990788	1	1	1	-0.375206276886218	-0.0253824400419349	0	-0.00461215466175735	0	0	0	0.228243214498188
53	Diphenhydramine	3	34	32	1088	0.68028210402586	0.974149401254514	1	0.995250733342646	1	1	1	-0.385247707980571	-0.0261905977241983	0	-0.00476058025933378	0	0	0	0.234335925875961
54	Famotidine	3	330	1	330	0.999858103514776	1	1	1	1	1	1	-0.000141906553482707	0	0	0	0	0	0	8.74147005786207e-05
54	Famotidine	3	330	2	660	0.999716247293064	1	1	1	1	1	1	-0.000283792972352843	0	0	0	0	0	0	0.000174816998198492
54	Famotidine	3	330	3	990	0.999574431317728	1	1	1	1	1	1	-0.000425659262322881	0	0	0	0	0	0	0.000262206896378507
54	Famotidine	3	330	4	1320	0.999432655571645	1	1	1	1	1	1	-0.000567505429103701	0	0	0	0	0	0	0.00034958439863658
54	Famotidine	3	330	5	1650	0.999290920037697	1	1	1	1	1	1	-0.00070933147840281	0	0	0	0	0	0	0.000436949508488544
54	Famotidine	3	330	6	1980	0.99914922469878	1	1	1	1	1	1	-0.000851137415926336	0	0	0	0	0	0	0.000524302229449386
54	Famotidine	3	330	7	2310	0.999007569537798	1	1	1	1	1	1	-0.000992923247376687	0	0	0	0	0	0	0.000611642565031799
54	Famotidine	3	330	8	2640	0.998865954537664	1	1	1	1	1	1	-0.00113468897845522	0	0	0	0	0	0	0.000698970518747826
54	Famotidine	3	330	9	2970	0.998724379681301	1	1	1	1	1	1	-0.00127643461485977	0	0	0	0	0	0	0.000786286094107351
54	Famotidine	3	330	10	3300	0.998582844951643	1	1	1	1	1	1	-0.00141816016228656	0	0	0	0	0	0	0.000873589294619119
54	Famotidine	3	330	11	3630	0.998441350331632	1	1	1	1	1	1	-0.00155986562642863	0	0	0	0	0	0	0.000960880123790462
54	Famotidine	3	330	12	3960	0.99829989580422	1	1	1	1	1	1	-0.00170155101297726	0	0	0	0	0	0	0.00104815858512681
54	Famotidine	3	330	13	4290	0.99815848135237	1	1	1	1	1	1	-0.00184321632762112	0	0	0	0	0	0	0.00113542468213253
54	Famotidine	3	330	14	4620	0.998017106959053	1	1	1	1	1	1	-0.00198486157604608	0	0	0	0	0	0	0.00122267841831013
54	Famotidine	3	330	15	4950	0.997875772607251	1	1	1	1	1	1	-0.00212648676393629	0	0	0	0	0	0	0.00130991979716105
54	Famotidine	3	330	16	5280	0.997734478279954	1	1	1	1	1	1	-0.00226809189697265	0	0	0	0	0	0	0.00139714882218474
54	Famotidine	3	330	17	5610	0.997593223960163	1	1	1	1	1	1	-0.00240967698083465	0	0	0	0	0	0	0.00148436549687979
54	Famotidine	3	330	18	5940	0.997452009630889	1	1	1	1	1	1	-0.00255124202119821	0	0	0	0	0	0	0.00157156982474255
54	Famotidine	3	330	19	6270	0.99731083527515	1	1	1	1	1	1	-0.00269278702373802	0	0	0	0	0	0	0.00165876180926866
54	Famotidine	3	330	20	6600	0.997169700875978	1	1	1	1	1	1	-0.00283431199412521	0	0	0	0	0	0	0.00174594145395154
54	Famotidine	3	330	21	6930	0.997028606416409	1	1	1	1	1	1	-0.00297581693802933	0	0	0	0	0	0	0.00183310876228364
54	Famotidine	3	330	22	7260	0.996887551879494	1	1	1	1	1	1	-0.00311730186111769	0	0	0	0	0	0	0.00192026373775604
54	Famotidine	3	330	23	7590	0.996746537248291	1	1	1	1	1	1	-0.00325876676905401	0	0	0	0	0	0	0.0020074063838576
54	Famotidine	3	330	24	7920	0.996605562505866	1	1	1	1	1	1	-0.0034002116675011	0	0	0	0	0	0	0.00209453670407662
54	Famotidine	3	330	25	8250	0.996464627635299	1	1	1	1	1	1	-0.00354163656211805	0	0	0	0	0	0	0.00218165470189911
54	Famotidine	3	330	26	8580	0.996323732619675	1	1	1	1	1	1	-0.00368304145856257	0	0	0	0	0	0	0.00226876038081024
54	Famotidine	3	330	27	8910	0.996182877442091	1	1	1	1	1	1	-0.00382442636248913	0	0	0	0	0	0	0.00235585374429315
54	Famotidine	3	330	28	9240	0.996042062085653	1	1	1	1	1	1	-0.00396579127955077	0	0	0	0	0	0	0.00244293479583014
54	Famotidine	3	330	29	9570	0.995901286533478	1	1	1	1	1	1	-0.00410713621539693	0	0	0	0	0	0	0.00253000353890128
54	Famotidine	3	330	30	9900	0.995760550768689	1	1	1	1	1	1	-0.00424846117567589	0	0	0	0	0	0	0.00261705997698577
54	Famotidine	3	330	31	10230	0.995619854774422	1	1	1	1	1	1	-0.00438976616603238	0	0	0	0	0	0	0.0027041041135612
54	Famotidine	3	330	32	10560	0.995479198533822	1	1	1	1	1	1	-0.00453105119210964	0	0	0	0	0	0	0.0027911359521034
55	Fluvoxamine	3	377	1	377	0.89157319528329	0.990522161047842	1	0.928557892742088	1	1	1	-0.114767741534624	-0.00952303949680336	0	-0.0741225493069499	0	0	0	0.0243391704970438
55	Fluvoxamine	3	377	2	754	0.804359107420861	0.981222294167455	1	0.866643084541917	1	1	1	-0.217709458501074	-0.0189562455274985	0	-0.143128054154818	0	0	0	0.04459380686736
55	Fluvoxamine	3	377	3	1131	0.73268730796502	0.972095433125262	1	0.81246891062842	1	1	1	-0.31103626024683	-0.0283012971136216	0	-0.207677629352269	0	0	0	0.0617124799526383
55	Fluvoxamine	3	377	4	1508	0.672743055555556	0.963136794758971	1	0.764669163545568	1	1	1	-0.39639181190249	-0.0375598266398782	0	-0.268312004649477	0	0	0	0.0763695055267563
55	Fluvoxamine	3	377	5	1885	0.621865596790371	0.954341770618869	1	0.722181282240236	1	1	1	-0.475031291922701	-0.0467334215655038	0	-0.325479088170252	0	0	0	0.0890579436599942
55	Fluvoxamine	3	377	6	2262	0.578142484147706	0.945705919062935	1	0.684166433956995	1	1	1	-0.547934928322667	-0.0558236260578349	0	-0.37955406645966	0	0	0	0.100146966212961
55	Fluvoxamine	3	377	7	2639	0.540163791601324	0.937224957777302	1	0.649953574744661	1	1	1	-0.615882867635125	-0.0648319425523023	0	-0.430854342112984	0	0	0	0.109918633911565
55	Fluvoxamine	3	377	8	3016	0.506867233485939	0.928894756695587	1	0.61899949469429	1	1	1	-0.679506176575715	-0.0737598332427817	0	-0.479650822623738	0	0	0	0.118592253158728
55	Fluvoxamine	3	377	9	3393	0.477437240104728	0.920711331292501	1	0.590859761244423	1	1	1	-0.739322562035249	-0.0826087215060048	0	-0.526176580352486	0	0	0	0.126340963469462
55	Fluvoxamine	3	377	10	3770	0.451237263464338	0.912670836228863	1	0.565167243367935	1	1	1	-0.795761994743157	-0.0913799932634981	0	-0.57063358567587	0	0	0	0.133303310626679
55	Fluvoxamine	3	377	11	4147	0.427763212363737	0.904769559326705	1	0.541616005305626	1	1	1	-0.849185478636044	-0.100074998284308	0	-0.613198005927024	0	0	0	0.139591494566141
55	Fluvoxamine	3	377	12	4524	0.406610703043022	0.897003915854658	1	0.519949066213922	1	1	1	-0.899899054860801	-0.108695051431579	0	-0.65402442179265	0	0	0	0.145297358835297
55	Fluvoxamine	3	377	13	4901	0.387451568553931	0.889370443105122	1	0.49994898479747	1	1	1	-0.948164422376886	-0.117241433855858	0	-0.693249216170462	0	0	0	0.15049681343352
55	Fluvoxamine	3	377	14	5278	0.370016710432084	0.881865795245982	1	0.481430536451169	1	1	1	-0.994207111033743	-0.125715394137844	0	-0.73099332305006	0	0	0	0.155253150228754
55	Fluvoxamine	3	377	15	5655	0.354083380925186	0.874486738430807	1	0.464234959734723	1	1	1	-1.03822285424671	-0.134118149383113	0	-0.767364476183703	0	0	0	0.159619562166554
55	Fluvoxamine	3	377	16	6032	0.339465615418309	0.867230146152492	1	0.448225393340651	1	1	1	-1.08038261717645	-0.142450886271243	0	-0.802459062949241	0	0	0	0.163641081188819
55	Fluvoxamine	3	377	17	6409	0.326006940792933	0.860092994826344	1	0.433283225749403	1	1	1	-1.12083660706621	-0.150714762061586	0	-0.836363663772609	0	0	0	0.167356085818282
55	Fluvoxamine	3	377	18	6786	0.313574752174793	0.853072359589486	1	0.419305151463289	1	1	1	-1.15971750339367	-0.158910905557815	0	-0.869156339015664	0	0	0	0.17079748608835
55	Fluvoxamine	3	377	19	7163	0.302055929065575	0.846165410304319	1	0.406200779242311	1	1	1	-1.19714308317248	-0.167040418033269	0	-0.900907711466666	0	0	0	0.173993663718934
55	Fluvoxamine	3	377	20	7540	0.291353383458647	0.83936940775458	1	0.393890675241158	1	1	1	-1.2332183724224	-0.175104374118989	0	-0.931681882194453	0	0	0	0.176969224629492
55	Fluvoxamine	3	377	21	7917	0.281383316692385	0.832681700023247	1	0.382304751501912	1	1	1	-1.26803742286683	-0.18310382265623	0	-0.961537209631106	0	0	0	0.179745606131529
55	Fluvoxamine	3	377	22	8294	0.272073020888187	0.826099719042228	1	0.371380930726088	1	1	1	-1.3016847895671	-0.191039787515142	0	-0.990526975684098	0	0	0	0.182341570551995
55	Fluvoxamine	3	377	23	8671	0.263359102879959	0.819620977304404	1	0.361064033601061	1	1	1	-1.33423676793924	-0.198913268381233	0	-1.01869995798265	0	0	0	0.184773609341673
55	Fluvoxamine	3	377	24	9048	0.255186038854132	0.813243064729194	1	0.351304846572985	1	1	1	-1.3657624356924	-0.206725241511095	0	-1.04610092369682	0	0	0	0.187056276065234
55	Fluvoxamine	3	377	25	9425	0.24750499001996	0.806963645673323	1	0.342059336823735	1	1	1	-1.39632453547983	-0.214476660458854	0	-1.07277105748422	0	0	0	0.189202462467995
55	Fluvoxamine	3	377	26	9802	0.240272825918462	0.800780456079021	1	0.33328798802884	1	1	1	-1.42598022661895	-0.222168456774673	0	-1.09874833383532	0	0	0	0.191223628663459
55	Fluvoxamine	3	377	27	10179	0.233451314104978	0.794691300752335	1	0.324955235758339	1	1	1	-1.45478172851709	-0.229801540676596	0	-1.12406784226708	0	0	0	0.193129996101046
55	Fluvoxamine	3	377	28	10556	0.227006444053896	0.788694050764673	1	0.317028985507246	1	1	1	-1.48277687400104	-0.237376801696951	0	-1.14876207235358	0	0	0	0.194930710153367
55	Fluvoxamine	3	377	29	10933	0.220907860044182	0.782786640971132	1	0.309480199583149	1	1	1	-1.5100095872779	-0.244895109304441	0	-1.17286116440272	0	0	0	0.196633977761916
55	Fluvoxamine	3	377	30	11310	0.215128383067314	0.776967067639519	1	0.302282541640962	1	1	1	-1.53652029852033	-0.25235731350304	0	-1.196393130631	0	0	0	0.198247184494469
55	Fluvoxamine	3	377	31	11687	0.209643605870021	0.771233386184352	1	0.295412069693133	1	1	1	-1.56234630490025	-0.259764245408689	0	-1.21938405090732	0	0	0	0.199776994519815
55	Fluvoxamine	3	377	32	12064	0.204431548404115	0.765583709000466	1	0.288846970054232	1	1	1	-1.58752208616299	-0.267116717804811	0	-1.24185824649576	0	0	0	0.201229436339197
56	Metronidazole	3	187000	1	187000	0.877553693033002	0.991060758162436	1	0.487530830364483	1	1	1	-0.130617136872468	-0.00897943657952321	0	-0.718401748770612	0	0	0	-0.368844813930959
56	Metronidazole	3	187000	2	374000	0.781822424454556	0.982279920401782	1	0.322341003805037	1	1	1	-0.246127642925712	-0.0178789599214382	0	-1.13214527577367	0	0	0	-0.556454981403948
56	Metronidazole	3	187000	3	561000	0.70492320639596	0.973653313295449	1	0.240763296792529	1	1	1	-0.349666409200784	-0.0266999798768015	0	-1.42394099912281	0	0	0	-0.67517076155889
56	Metronidazole	3	187000	4	748000	0.641796762762187	0.965176908752328	1	0.192137379846636	1	1	1	-0.44348359431694	-0.0354438693132038	0	-1.64954464278221	0	0	0	-0.758476982969643
56	Metronidazole	3	187000	5	935000	0.58904711673699	0.956846817741266	1	0.159852637254021	1	1	1	-0.529249104069851	-0.0441119653971099	0	-1.83350290530759	0	0	0	-0.820697058477726
56	Metronidazole	3	187000	6	1122000	0.54430996669645	0.948659284341539	1	0.136856681283176	1	1	1	-0.608236402674444	-0.0527055708210935	0	-1.98882102274218	0	0	0	-0.869180309774779
56	Metronidazole	3	187000	7	1309000	0.50588857013438	0.940610680096184	1	0.119644898782702	1	1	1	-0.681438851071754	-0.06122595497879	0	-2.12322710003139	0	0	0	-0.908148161793481
56	Metronidazole	3	187000	8	1496000	0.472533671814399	0.932697498650351	1	0.106278750224028	1	1	1	-0.749646271488176	-0.0696743550902147	0	-2.24168991743678	0	0	0	-0.940221673664745
56	Metronidazole	3	187000	9	1683000	0.443305107171209	0.924916350658042	1	0.095598903756247	1	1	1	-0.813497016496209	-0.0780519772799426	0	-2.34759392597539	0	0	0	-0.967124333638134
56	Metronidazole	3	187000	10	1870000	0.417481776836334	0.917263958941687	1	0.0868694760486352	1	1	1	-0.873514383940047	-0.0863599976104988	0	-2.44334856217048	0	0	0	-0.990040707079595
56	Metronidazole	3	187000	11	2057000	0.394501354056282	0.909737153890035	1	0.0796008769967336	1	1	1	-0.930132706366784	-0.0945995630731741	0	-2.53073016864559	0	0	0	-1.00981421044936
56	Metronidazole	3	187000	12	2244000	0.373918866134702	0.90233286908078	1	0.0734547256286387	1	1	1	-0.983716440570218	-0.102771792538354	0	-2.61108604039729	0	0	0	-1.02706296740658
56	Metronidazole	3	187000	13	2431000	0.355377598642342	0.895048137115227	1	0.0681896584767527	1	1	1	-1.0345743966428	-0.110877777667328	0	-2.68546236086874	0	0	0	-1.0422510578918
56	Metronidazole	3	187000	14	2618000	0.338588247183063	0.887880085653105	1	0.0636288851532601	1	1	1	-1.08297051991781	-0.118918583787446	0	-2.7546877426632	0	0	0	-1.05573412474173
56	Metronidazole	3	187000	15	2805000	0.323313712245489	0.880825933636402	1	0.0596399477019008	1	1	1	-1.12913218177099	-0.126895250732359	0	-2.81942966598235	0	0	0	-1.06778956445594
56	Metronidazole	3	187000	16	2992000	0.309357832048382	0.873882987691789	1	0.0561216442159059	1	1	1	-1.17325663956781	-0.13480879364902	0	-2.88023372596063	0	0	0	-1.07863709405581
56	Metronidazole	3	187000	17	3179000	0.296556912727916	0.867048638701853	1	0.0529953230659239	1	1	1	-1.21551613047198	-0.142660203773005	0	-2.93755161336292	0	0	0	-1.08845311307014
56	Metronidazole	3	187000	18	3366000	0.284773277803748	0.860320358535978	1	0.0501989333784813	1	1	1	-1.25606193178271	-0.150450449173625	0	-2.99176149995079	0	0	0	-1.09738095184343
56	Metronidazole	3	187000	19	3553000	0.273890296738331	0.853695696932263	1	0.0476828647243293	1	1	1	-1.29502762963369	-0.158180475470248	0	-3.04318317572435	0	0	0	-1.10553832519543
56	Metronidazole	3	187000	20	3740000	0.263808511475926	0.847172278522393	1	0.0454069782281324	1	1	1	-1.33253177433722	-0.165851206521142	0	-3.09208948028084	0	0	0	-1.11302284616258
56	Metronidazole	3	187000	21	3927000	0.254442588092345	0.840747799991889	1	0.0433384491705035	1	1	1	-1.36868005550363	-0.173463545086098	0	-3.13871506638208	0	0	0	-1.1199161670599
56	Metronidazole	3	187000	22	4114000	0.24571889553005	0.834420027368591	1	0.0414501735827955	1	1	1	-1.40356709752782	-0.181018373464025	0	-3.18326320964614	0	0	0	-1.12628713239797
56	Metronidazole	3	187000	23	4301000	0.237573565907963	0.828186793432669	1	0.0397195740025453	1	1	1	-1.43727795227901	-0.188516554106638	0	-3.22591116487413	0	0	0	-1.13219420935508
56	Metronidazole	3	187000	24	4488000	0.229950928245427	0.822045995241871	1	0.0381276924066097	1	1	1	-1.46988934827712	-0.195958930209313	0	-3.26681442604683	0	0	0	-1.13768738258341
56	Metronidazole	3	187000	25	4675000	0.222802234339673	0.815995591766049	1	0.0366584928599394	1	1	1	-1.50147074252475	-0.203346326280112	0	-3.30611014871029	0	0	0	-1.14280964671844
56	Metronidazole	3	187000	26	4862000	0.216084615136564	0.810033601625381	1	0.0352983194110994	1	1	1	-1.53208521126342	-0.210679548687944	0	-3.34391992492694	0	0	0	-1.14759819319064
56	Metronidazole	3	187000	27	5049000	0.209760220371878	0.804158100927039	1	0.0340354703552775	1	1	1	-1.56179020837673	-0.217959386190782	0	-3.38035205242518	0	0	0	-1.15208536222672
56	Metronidazole	3	187000	28	5236000	0.203795505002889	0.798367221195317	1	0.0328598607288646	1	1	1	-1.59063821435976	-0.225186610444775	0	-3.41550340470018	0	0	0	-1.15629941268801
56	Metronidazole	3	187000	29	5423000	0.198160634019399	0.792659147390556	1	0.0317627524147905	1	1	1	-1.61867729427346	-0.232361976495114	0	-3.44946098342401	0	0	0	-1.160265149283
56	Metronidazole	3	187000	30	5610000	0.192828983338609	0.787032116012452	1	0.030736536567667	1	1	1	-1.64595157958414	-0.239486223249395	0	-3.48230321580525	0	0	0	-1.16400443715229
56	Metronidazole	3	187000	31	5797000	0.187776719161576	0.781484413283577	1	0.0297745568963497	1	1	1	-1.6725016860182	-0.246560073934248	0	-3.51410104558619	0	0	0	-1.16753662680439
56	Metronidazole	3	187000	32	5984000	0.182982441768384	0.776014373409193	1	0.0288709651243934	1	1	1	-1.69836507736474	-0.253584236535929	0	-3.5449188558559	0	0	0	-1.17087890716149
57	Nelfinavir	3	60.25	1	60.25	0.999879799839301	0.999792506291536	1	1	0.999242074012573	1	0.999987978688259	-0.000120207385317391	-0.0002075152382614	0	0	-0.000758213358540929	0	-1.20213839971536e-05	0.000399947811013244
57	Nelfinavir	3	60.25	2	120.5	0.999759628571286	0.999585098672488	1	1	0.998485296058627	1	0.999975957665539	-0.000240400322555937	-0.000414987422882872	0	0	-0.00151585226511459	0	-2.40426234822945e-05	0.000799639807574149
57	Nelfinavir	3	60.25	3	180.75	0.999639486185539	0.999377777089288	1	1	0.997729663531739	1	0.999963936931829	-0.000360578815188791	-0.000622416571725254	0	0	-0.00227291758951608	0	-3.60637184592433e-05	0.00119907636568276
57	Nelfinavir	3	60.25	4	241	0.99951937267165	0.999170541488413	1	1	0.996975173833371	1	0.999951916487118	-0.000480742866686752	-0.000829802702639071	0	0	-0.00302941019956725	0	-4.80846689309328e-05	0.00159825786048952
57	Nelfinavir	3	60.25	5	301.25	0.999399288019211	0.998963391816387	1	1	0.996221824372839	1	0.999939896331397	-0.000600892480520267	-0.00103714583346317	0	0	-0.00378533096112095	0	-6.01054749010733e-05	0.00199718466629832
57	Nelfinavir	3	60.25	6	361.5	0.999279232217821	0.998756328019775	1	1	0.995469612567282	1	0.999927876464654	-0.000721027660158422	-0.00124444598202522	0	0	-0.00454068073806923	0	-7.21261363732645e-05	0.00239585715656941
57	Nelfinavir	3	60.25	7	421.75	0.999159205257085	0.998549350045188	1	1	0.994718535841638	1	0.999915856886879	-0.000841148409068723	-0.00145170316614183	0	0	-0.00529546039234655	0	-8.41466533508843e-05	0.00279427570392065
57	Nelfinavir	3	60.25	8	482	0.999039207126611	0.99834245783928	1	1	0.993968591628605	1	0.999903837598063	-0.000961254730717979	-0.00165891740361911	0	0	-0.00604967078393854	0	-9.61670258374223e-05	0.00319244068013182
57	Nelfinavir	3	60.25	9	542.25	0.998919237816013	0.998135651348752	1	1	0.993219777368624	1	0.999891818598193	-0.00108134662857086	-0.00186608871225148	0	0	-0.00680331277088527	0	-0.000108187253836479	0.00359035245614511
57	Nelfinavir	3	60.25	10	602.5	0.99879929731491	0.997928930520345	1	1	0.992472090509836	1	0.999879799887261	-0.00120142410609155	-0.00207321710982261	0	0	-0.00755638720928938	0	-0.000120207337351212	0.00398801140206968
57	Nelfinavir	3	60.25	11	662.75	0.998679385612925	0.997722295300849	1	1	0.991725528508067	1	0.999867781465256	-0.00132148716674287	-0.00228030261410468	0	0	-0.00830889495331961	0	-0.000132227276385333	0.00438541788718257
57	Nelfinavir	3	60.25	12	723	0.998559502699687	0.997515745637093	1	1	0.990980088826788	1	0.999855763332166	-0.00144153581398627	-0.00248734524285953	0	0	-0.00906083685521925	0	-0.000144247070942223	0.0047825722799324
57	Nelfinavir	3	60.25	13	783.25	0.99843964856483	0.997309281475953	1	1	0.990235768937092	1	0.999843745487983	-0.0015615700512816	-0.00269434501383764	0	0	-0.00981221376530931	0	-0.000156266721025372	0.00517947494794056
57	Nelfinavir	3	60.25	14	843.5	0.998319823197993	0.997102902764349	1	1	0.989492566317665	1	0.999831727932694	-0.00168158988208812	-0.00290130194477819	0	0	-0.0105630265319962	0	-0.000168286226638495	0.00557612625800511
57	Nelfinavir	3	60.25	15	903.75	0.998200026588819	0.996896609449245	1	1	0.988750478454755	1	0.999819710666291	-0.00180159530986346	-0.0031082160534095	0	0	-0.0113132760017765	0	-0.000180305587784639	0.0059725265761022
57	Nelfinavir	3	60.25	16	964	0.998080258726957	0.996690401477647	1	1	0.988009502842146	1	0.999807693688762	-0.00192158633806413	-0.00331508735744939	0	0	-0.0120629630192432	0	-0.000192324804467408	0.00636867626738914
57	Nelfinavir	3	60.25	17	1024.25	0.99796051960206	0.996484278796606	1	1	0.98726963698113	1	0.999795677000098	-0.00204156297014557	-0.0035219158746041	0	0	-0.0128120884270907	0	-0.000204343876690405	0.00676457569620647
57	Nelfinavir	3	60.25	18	1084.5	0.997840809203787	0.996278241353217	1	1	0.986530878380476	1	0.999783660600287	-0.00216152520956128	-0.00372870162256904	0	0	-0.0135606530661217	0	-0.000216362804457013	0.0071602252260804
57	Nelfinavir	3	60.25	19	1144.75	0.997721127521802	0.996072289094619	1	1	0.985793224556407	1	0.999771644489319	-0.00228147305976425	-0.00393544461902865	0	0	-0.0143086577752512	0	-0.000228381587770725	0.00755562521972552
57	Nelfinavir	3	60.25	20	1205	0.997601474545773	0.995866421967995	1	1	0.985056673032565	1	0.999759628667184	-0.00240140652420598	-0.00414214488165626	0	0	-0.0150561033915142	0	-0.000240400226635368	0.00795077603904738
57	Nelfinavir	3	60.25	21	1265.25	0.997481850265374	0.995660639920569	1	1	0.984321221339992	1	0.999747613133871	-0.0025213256063367	-0.00434880242811472	0	0	-0.015802990750069	0	-0.00025241872105366	0.00834567804514408
57	Nelfinavir	3	60.25	22	1325.5	0.997362254670282	0.995454942899613	1	1	0.983586867017094	1	0.999735597889371	-0.00264123030960576	-0.00455541727605555	0	0	-0.016549320684205	0	-0.000264437071029538	0.00874033159830995
57	Nelfinavir	3	60.25	23	1385.75	0.997242687750181	0.995249330852438	1	1	0.98285360760962	1	0.999723582933672	-0.00276112063746027	-0.00476198944311939	0	0	-0.0172950940253464	0	-0.000276455276566499	0.00913473705803617
57	Nelfinavir	3	60.25	24	1446	0.997123149494761	0.995043803726402	1	1	0.982121440670631	1	0.999711568266765	-0.00288099659334713	-0.00496851894693563	0	0	-0.0180403116030594	0	-0.000288473337667815	0.00952889478301516
57	Nelfinavir	3	60.25	25	1506.25	0.997003639893713	0.994838361468904	1	1	0.981390363760475	1	0.999699553888638	-0.00300085818071175	-0.00517500580512357	0	0	-0.0187849742450563	0	-0.000300491254337426	0.00992280513114163
57	Nelfinavir	3	60.25	26	1566.5	0.996884158936735	0.994633004027388	1	1	0.980660374446756	1	0.999687539799281	-0.0031207054029981	-0.00538145003529084	0	0	-0.0195290827772024	0	-0.000312509026578163	0.0103164684595154
57	Nelfinavir	3	60.25	27	1626.75	0.996764706613532	0.994427731349342	1	1	0.979931470304313	1	0.999675525998685	-0.00324053826364877	-0.0055878516550346	0	0	-0.0202726380235198	0	-0.000324526654393743	0.0107098851244433
57	Nelfinavir	3	60.25	28	1687	0.996645282913811	0.994222543382295	1	1	0.979203648915187	1	0.999663512486838	-0.0033603567661056	-0.00579421068194047	0	0	-0.0210156408061949	0	-0.000336544137787776	0.0111030554814427
57	Nelfinavir	3	60.25	29	1747.25	0.996525887827286	0.994017440073821	1	1	0.978476907868601	1	0.999651499263731	-0.00348016091380881	-0.00600052713358422	0	0	-0.0217580919455818	0	-0.000348561476763535	0.0114959798852422
57	Nelfinavir	3	60.25	30	1807.5	0.996406521343673	0.993812421371537	1	1	0.977751244760926	1	0.999639486329352	-0.0035999507101975	-0.00620680102752999	0	0	-0.0224999922602097	0	-0.00036057867132463	0.0118886586897856
57	Nelfinavir	3	60.25	31	1867.75	0.996287183452696	0.993607487223103	1	1	0.977026657195659	1	0.999627473683691	-0.00371972615870984	-0.00641303238133121	0	0	-0.0232413425667866	0	-0.000372595721474781	0.012281092248233
57	Nelfinavir	3	60.25	32	1928	0.996167874144082	0.993402637576222	1	1	0.976303142783397	1	0.999615461326738	-0.00383948726278188	-0.0066192212125302	0	0	-0.023982143680206	0	-0.00038461262721682	0.0126732809129636
58	Paroxetine	3	12.7	1	12.7	0.989307064073419	0.998705758863514	1	0.996754159531781	1	1	1	-0.0107505162019352	-0.00129507938989213	0	-0.00325111963504235	0	0	0	0.00458901188920122
58	Paroxetine	3	12.7	2	25.4	0.978840386537821	0.997414863517007	1	0.99352932185255	1	1	1	-0.0213866869879528	-0.00258848371826217	0	-0.00649170373424073	0	0	0	0.00911417595966171
58	Paroxetine	3	12.7	3	38.1	0.968592861264529	0.996127301003242	1	0.990325283766283	1	1	1	-0.0319109191986143	-0.00388021731257739	0	-0.0097218203597336	0	0	0	0.0135769322619897
58	Paroxetine	3	12.7	4	50.8	0.958557676619351	0.994843058431803	1	0.987141844689683	1	1	1	-0.042325544473372	-0.00517028448355745	0	-0.0129415369162345	0	0	0	0.0179786749339391
58	Paroxetine	3	12.7	5	63.5	0.948728300363343	0.993562122978659	1	0.983978806610319	1	1	1	-0.052632822351155	-0.00645868952526017	0	-0.0161509201594727	0	0	0	0.0223207541050977
58	Paroxetine	3	12.7	6	76.2	0.939098465473146	0.992284481885745	1	0.980835974045571	1	1	1	-0.0628349432127873	-0.00774543671516711	0	-0.0193500362044983	0	0	0	0.0266044777042276
58	Paroxetine	3	12.7	7	88.9	0.929662156816204	0.991010122460537	1	0.977713154002356	1	1	1	-0.0729340310748211	-0.00903053031426862	0	-0.0225389505338539	0	0	0	0.0308311131751612
58	Paroxetine	3	12.7	8	101.6	0.920413598621338	0.989739032075624	1	0.974610155937625	1	1	1	-0.0829321462436977	-0.0103139745671492	0	-0.0257177280056169	0	0	0	0.0350018891067394
58	Paroxetine	3	12.7	9	114.3	0.911347242689832	0.988471198168302	1	0.971526791719602	1	1	1	-0.0928312878385326	-0.0115957737020713	0	-0.028886432861315	0	0	0	0.039117996781901
58	Paroxetine	3	12.7	10	127	0.902457757296467	0.987206608240153	1	0.968462875589769	1	1	1	-0.102633396190255	-0.0128759319310586	0	-0.0320451287337164	0	0	0	0.0431805916506859
58	Paroxetine	3	12.7	11	139.7	0.893740016733856	0.985945249856635	1	0.965418224125554	1	1	1	-0.112340355124299	-0.0141544534499792	0	-0.0351938786544964	0	0	0	0.0471907947315806
58	Paroxetine	3	12.7	12	152.4	0.885189091456984	0.984687110646678	1	0.962392656203731	1	1	1	-0.121953994133565	-0.0154313424386283	0	-0.0383327450617845	0	0	0	0.051149693945348
58	Paroxetine	3	12.7	13	165.1	0.87680023878815	0.983432178302275	1	0.959385992964503	1	1	1	-0.131476090447923	-0.0167066030608105	0	-0.0414617898075946	0	0	0	0.0550583453851974
58	Paroxetine	3	12.7	14	177.8	0.868568894145476	0.982180440578083	1	0.956398057776252	1	1	1	-0.140908371006111	-0.0179802394644204	0	-0.0445810741651362	0	0	0	0.0589177745269047
58	Paroxetine	3	12.7	15	190.5	0.860490662760893	0.980931885291026	1	0.953428676200954	1	1	1	-0.1502525143355	-0.019252255781524	0	-0.047690658836015	0	0	0	0.0627289773822491
58	Paroxetine	3	12.7	16	203.2	0.852561311856044	0.979686500319898	1	0.950477675960226	1	1	1	-0.159510152344848	-0.0205226561284394	0	-0.0507906039573209	0	0	0	0.0664929215989178
58	Paroxetine	3	12.7	17	215.9	0.844776763246819	0.978444273604968	1	0.947544886902014	1	1	1	-0.168682872034825	-0.0217914446058165	0	-0.053880969108605	0	0	0	0.0702105475098311
58	Paroxetine	3	12.7	18	228.6	0.837133086349387	0.977205193147598	1	0.944630140967883	1	1	1	-0.177772217130801	-0.0230586252987166	0	-0.0569618133187513	0	0	0	0.0738827691346433
58	Paroxetine	3	12.7	19	241.3	0.829626491562522	0.975969247009849	1	0.941733272160916	1	1	1	-0.186779689642091	-0.0243242022766901	0	-0.0600331950727423	0	0	0	0.0775104751360115
58	Paroxetine	3	12.7	20	254	0.822253324002799	0.974736423314104	1	0.938854116514203	1	1	1	-0.195706751351608	-0.0255881795938573	0	-0.0630951723183199	0	0	0	0.0810945297330547
58	Paroxetine	3	12.7	21	266.7	0.815010057570923	0.973506710242681	1	0.935992512059904	1	1	1	-0.204554825239599	-0.0268505612889839	0	-0.0661478024725451	0	0	0	0.08463577357428
58	Paroxetine	3	12.7	22	279.4	0.807893289328933	0.972280096037462	1	0.933148298798871	1	1	1	-0.213325296844955	-0.0281113513855604	0	-0.0691911424282598	0	0	0	0.088135024572108
58	Paroxetine	3	12.7	23	292.1	0.80089973416945	0.971056568999514	1	0.930321318670833	1	1	1	-0.222019515567339	-0.029370553891877	0	-0.0722252485604473	0	0	0	0.091593078701008
58	Paroxetine	3	12.7	24	304.8	0.794026219759427	0.969836117488718	1	0.927511415525114	1	1	1	-0.230638795913191	-0.0306281728011022	0	-0.075250176732499	0	0	0	0.095010710761121
58	Paroxetine	3	12.7	25	317.5	0.787269681742044	0.9686187299234	1	0.924718435091879	1	1	1	-0.239184418688498	-0.0318842120913573	0	-0.0782659823023855	0	0	0	0.0983886751091479
58	Paroxetine	3	12.7	26	330.2	0.780627159181504	0.967404394779965	1	0.921942224953903	1	1	1	-0.247657632141023	-0.0331386757257927	0	-0.0812727201287364	0	0	0	0.101727706358164
58	Paroxetine	3	12.7	27	342.9	0.774095790236511	0.966193100592533	1	0.919182634518843	1	1	1	-0.256059653054554	-0.0343915676526618	0	-0.0842704445768261	0	0	0	0.105028520047931
58	Paroxetine	3	12.7	28	355.6	0.767672808049131	0.964984835952578	1	0.916439514992011	1	1	1	-0.264391667797562	-0.0356428918053973	0	-0.0872592095244731	0	0	0	0.108291813287187
58	Paroxetine	3	12.7	29	368.3	0.761355536836649	0.963779589508571	1	0.913712719349624	1	1	1	-0.272654833328527	-0.0368926521026839	0	-0.0902390683678504	0	0	0	0.111518265369293
58	Paroxetine	3	12.7	30	381	0.755141388174807	0.962577349965622	1	0.911002102312544	1	1	1	-0.280850278160078	-0.0381408524485325	0	-0.0932100740272084	0	0	0	0.114708538362566
58	Paroxetine	3	12.7	31	393.7	0.749027857461593	0.961378106085131	1	0.90830752032047	1	1	1	-0.288979103283935	-0.039387496732353	0	-0.0961722789525145	0	0	0	0.117863277676518
58	Paroxetine	3	12.7	32	406.4	0.74301252055141	0.960181846684433	1	0.905628831506595	1	1	1	-0.297042383058567	-0.0406325888290276	0	-0.0991257351290097	0	0	0	0.120983112605179
59	Propafenone	3	241	1	241	0.701917130488559	0.913278157610651	0.943652092588263	0.874217118997912	1	1	1	-0.353939929661604	-0.0907147814681708	-0.0579977267534091	-0.134426514271639	0	0	0	0.121700729967722
59	Propafenone	3	241	2	482	0.54073368270605	0.840397350993378	0.893315626383355	0.776541492814094	1	1	1	-0.61482838990513	-0.173880462094582	-0.112815315554449	-0.25290520212999	0	0	0	0.196727606940338
59	Propafenone	3	241	3	723	0.439752034095312	0.778288868445262	0.848077327169573	0.698498748957465	1	1	1	-0.821544269803111	-0.250657527514986	-0.164783459647611	-0.358821891328293	0	0	0	0.246842656070965
59	Propafenone	3	241	4	964	0.370551746653608	0.724728726442033	0.8072	0.634710117468738	1	1	1	-0.992762176917272	-0.321957864571464	-0.214183809942738	-0.454586892244157	0	0	0	0.281982500290127
59	Propafenone	3	241	5	1205	0.320169252468265	0.67806572268234	0.770082045411181	0.581597222222222	1	1	1	-1.13890550905072	-0.388511059630096	-0.261258217328667	-0.541977128870825	0	0	0	0.307405545342052
59	Propafenone	3	241	6	1446	0.281847529178048	0.637048192771084	0.736227654140824	0.536686959307914	1	1	1	-1.26638903093595	-0.450909970430156	-0.306215895389232	-0.622340298011613	0	0	0	0.326176215683454
59	Propafenone	3	241	7	1687	0.251718784652916	0.600710059171598	0.705224532587804	0.498215348007139	1	1	1	-1.37944274850558	-0.509642891516941	-0.349239040935603	-0.696722869709394	0	0	0	0.340207222492362
59	Propafenone	3	241	8	1928	0.227409336806251	0.568293775190327	0.676727028839705	0.46489036913683	1	1	1	-1.48100363955411	-0.56511678412577	-0.390487294411129	-0.765953666488926	0	0	0	0.350755656634237
59	Propafenone	3	241	9	2169	0.207381691942262	0.539196940726578	0.65044319097502	0.435744016649324	1	1	1	-1.57319426122842	-0.617674393126809	-0.430101316165208	-0.830700325831016	0	0	0	0.358681743240953
59	Propafenone	3	241	10	2410	0.190596137699412	0.512934518997575	0.626124728513807	0.410036719706242	1	1	1	-1.6575985518739	-0.667607085238045	-0.468205680901884	-0.891508563034936	0	0	0	0.364593568726819
59	Propafenone	3	241	11	2651	0.176324374708715	0.489111582193101	0.603559144608943	0.387193712436431	1	1	1	-1.73542994213711	-0.715164631093407	-0.504911240580479	-0.948830162253837	0	0	0	0.368932632072737
59	Propafenone	3	241	12	2892	0.164041046393988	0.467403314917127	0.58256351039261	0.366761550251806	1	1	1	-1.80763859958331	-0.760562764653648	-0.540317068768772	-1.00304336892583	0	0	0	0.37202674301527
59	Propafenone	3	241	13	3133	0.153357654371031	0.447540116381591	0.562979495048124	0.348377703826955	1	1	1	-1.87498247528196	-0.803989099739695	-0.574512072379373	-1.05446803195588	0	0	0	0.374123976082589
59	Propafenone	3	241	14	3374	0.143980718000761	0.429296346414073	0.544669365721997	0.331748861160626	1	1	1	-1.93807589114441	-0.845607814353705	-0.607576336816633	-1.10337703859975	0	0	0	0.375415164646136
59	Propafenone	3	241	15	3615	0.135684399282726	0.412481716235982	0.527512743432231	0.316635160680529	1	1	1	-1.99742368350542	-0.885563398466157	-0.639582255758352	-1.15000508059318	0	0	0	0.376049212194501
59	Propafenone	3	241	16	3856	0.128292076410083	0.396934626212074	0.511403953370502	0.302838546374977	1	1	1	-2.05344576756788	-0.923983681345454	-0.670595485669007	-1.19455546573551	0	0	0	0.376143762289222
59	Propafenone	3	241	17	4097	0.121663629542288	0.382516955538809	0.496249846305176	0.29019404019404	1	1	1	-2.10649517704546	-0.960982298491975	-0.700675756693276	-1.23720547563459	0	0	0	0.375792788838368
59	Propafenone	3	241	18	4338	0.115686474365508	0.369109947643979	0.481967996178648	0.278563113254615	1	1	1	-2.15687155424789	-0.996660718228407	-0.729877565105589	-1.2781106267804	0	0	0	0.375072094742284
59	Propafenone	3	241	19	4579	0.110269114932478	0.356610931572292	0.468485200232153	0.26782858970259	1	1	1	-2.20483140161106	-1.03110991902494	-0.75825076748853	-1.31740809375862	0	0	0	0.374043360362723
59	Propafenone	3	241	20	4820	0.105336426914153	0.344930687686871	0.455736224028907	0.257890685142417	1	1	1	-2.25059598505645	-1.06441178739039	-0.785841092914973	-1.35521948484553	0	0	0	0.372757167874084
59	Propafenone	3	241	21	5061	0.10082615261615	0.333991314646664	0.443662745960207	0.248663895486936	1	1	1	-2.2943575064393	-1.09664029039545	-0.812690586348562	-1.391653111663	0	0	0	0.371255290328531
59	Propafenone	3	241	22	5302	0.0966862594769572	0.323724489795918	0.432212465195973	0.240074530600545	1	1	1	-2.33628398096302	-1.12786246507012	-0.838837994057383	-1.42680585968007	0	0	0	0.369572444868835
59	Propafenone	3	241	23	5543	0.092872923656002	0.31407004083653	0.421338344294812	0.232058742033804	1	1	1	-2.3765231325225	-1.15813925795911	-0.864319099909392	-1.46076474094357	0	0	0	0.367737650102529
59	Propafenone	3	241	24	5784	0.089348972683618	0.304974765681327	0.410997963340122	0.224560933100952	1	1	1	-2.41520553510796	-1.18752624126855	-0.889167019875012	-1.493608191696	0	0	0	0.365775287431053
59	Propafenone	3	241	25	6025	0.0860826697004171	0.296391451594067	0.401152966901898	0.217532467532468	1	1	1	-2.45244716887188	-1.21607422675186	-0.913412460818551	-1.52540716358261	0	0	0	0.363705938449332
59	Propafenone	3	241	26	6266	0.0830467549571962	0.28827805542935	0.391768588623568	0.210930613272888	1	1	1	-2.4883515170493	-1.24382979437202	-0.937083948652031	-1.55622604663604	0	0	0	0.361547051193333
59	Propafenone	3	241	27	6507	0.0802176832284967	0.280597014925373	0.382813241012994	0.204717672940601	1	1	1	-2.52301129928045	-1.27083574955506	-0.96020803010345	-1.58612345423018	0	0	0	0.359313474313102
59	Propafenone	3	241	28	6748	0.0775750119609049	0.273314667241008	0.374258160237389	0.198860263564051	1	1	1	-2.55650991446266	-1.29713152030553	-0.982809451678589	-1.6151528940562	0	0	0	0.357017888418005
59	Propafenone	3	241	29	6989	0.075100906504334	0.266400755746825	0.366077097505669	0.193328716528163	1	1	1	-2.58892264965462	-1.32275350343245	-1.00491131884155	-1.64336334442166	0	0	0	0.354671156702347
59	Propafenone	3	241	30	7230	0.0727797370952228	0.25982800982801	0.358246050062134	0.188096574957889	1	1	1	-2.6203176991264	-1.34773536751621	-1.02653523798116	-1.6707997514646	0	0	0	0.352282611718874
59	Propafenone	3	241	31	7471	0.0705977483361324	0.253571785393146	0.350743025984184	0.183140170566368	1	1	1	-2.65075702824746	-1.37210831894469	-1.04770144334996	-1.69750345995883	0	0	0	0.349860291280703
59	Propafenone	3	241	32	7712	0.0685427864001449	0.247609756097561	0.34354783792986	0.178438265686588	1	1	1	-2.68029710972698	-1.39590133629222	-1.06842891084501	-1.72351258807783	0	0	0	0.347411133561721
60	Quetiapine	3	33	1	33	0.992088228242628	0.99805114273903	1	0.996836959647273	1	1	1	-0.00794323589145692	-0.00195075875417573	0	-0.00316805333850526	0	0	0	0.0029116736022605
60	Quetiapine	3	33	2	66	0.98430066603235	0.996109866792408	1	0.993693865851328	1	1	1	-0.0158238736913535	-0.00389771945651536	0	-0.00632610180268907	0	0	0	0.00579104394562463
60	Quetiapine	3	33	3	99	0.976634411139958	0.99417612800753	1	0.990570530526717	1	1	1	-0.0236428923210708	-0.00584089686760476	0	-0.00947420838547713	0	0	0	0.00863867465023637
60	Quetiapine	3	33	4	132	0.969086651053864	0.992249882573978	1	0.987466767945309	1	1	1	-0.0314012479171819	-0.00778030566215056	0	-0.0126124354867361	0	0	0	0.0114551156716689
60	Quetiapine	3	33	5	165	0.961654659539856	0.990331087020217	1	0.984382394699479	1	1	1	-0.0390998745331112	-0.00971596042964262	0	-0.015740844920693	0	0	0	0.0142409037285072
60	Quetiapine	3	33	6	198	0.954335793357934	0.988419698210317	1	0.981317229665975	1	1	1	-0.0467396848139939	-0.0116478756750142	0	-0.0188594979232434	0	0	0	0.0169965627134925
60	Quetiapine	3	33	7	231	0.947127489127947	0.986515673340727	1	0.978271093970464	1	1	1	-0.0543215706459477	-0.0135760658192936	0	-0.0219684551591412	0	0	0	0.0197226040889778
60	Quetiapine	3	33	8	264	0.940027260336211	0.984618969937078	1	0.975243810952738	1	1	1	-0.0618464037809186	-0.0155005452002504	0	-0.0250677767290805	0	0	0	0.0224195272674056
60	Quetiapine	3	33	9	297	0.933032694475761	0.982729545851021	1	0.972235206132561	1	1	1	-0.0693150364381915	-0.0174213280730346	0	-0.0281575221766667	0	0	0	0.0250878199774784
60	Quetiapine	3	33	10	330	0.926141450313339	0.98084735925711	1	0.969245107176142	1	1	1	-0.076728301883603	-0.0193384286108105	0	-0.0312377504952802	0	0	0	0.0277279586166634
60	Quetiapine	3	33	11	363	0.919351255276605	0.978972368649713	1	0.966273343863235	1	1	1	-0.0840870149874444	-0.0212518609053841	0	-0.0343085201348343	0	0	0	0.0303404085906344
60	Quetiapine	3	33	12	396	0.912659902955448	0.977104532839963	1	0.963319748054835	1	1	1	-0.0913919727619861	-0.0231616389678245	0	-0.0373698890084313	0	0	0	0.0329256246402255
60	Quetiapine	3	33	13	429	0.906065250711627	0.975243810952738	1	0.960384153661465	1	1	1	-0.0986439548795106	-0.0250677767290805	0	-0.0404219144989154	0	0	0	0.0354840511564422
60	Quetiapine	3	33	14	462	0.899565217391304	0.973390162423684	1	0.957466396612042	1	1	1	-0.105843724171698	-0.0269702880405884	0	-0.0434646534653265	0	0	0	0.0380161224840461
60	Quetiapine	3	33	15	495	0.893157781135334	0.971543546996263	1	0.954566314823313	1	1	1	-0.11299202711116	-0.0288691866748776	0	-0.0464981622492562	0	0	0	0.0405222632142073
60	Quetiapine	3	33	16	528	0.886840977282469	0.969703924718843	1	0.951683748169839	1	1	1	-0.120089594275887	-0.030764486326168	0	-0.0495224966811072	0	0	0	0.0430028884666887
60	Quetiapine	3	33	17	561	0.880612896360928	0.967871255941813	1	0.94881853845452	1	1	1	-0.127137140797327	-0.0326562006109626	0	-0.0525377120862595	0	0	0	0.0454584041620081
60	Quetiapine	3	33	18	594	0.87447168216399	0.966045501314737	1	0.945970529379662	1	1	1	-0.134135366792789	-0.0345443430686353	0	-0.0555438632911417	0	0	0	0.0478892072840001
60	Quetiapine	3	33	19	627	0.868415529905561	0.964226621783534	1	0.943139566518545	1	1	1	-0.141084957782814	-0.0364289271620112	0	-0.0585410046292145	0	0	0	0.0502956861331782
60	Quetiapine	3	33	20	660	0.862442684451855	0.962414578587699	1	0.940325497287523	1	1	1	-0.147986585094152	-0.0383099662779428	0	-0.0615291899468618	0	0	0	0.0526782205712826
60	Quetiapine	3	33	21	693	0.856551438625543	0.960609333257545	1	0.937528170918597	1	1	1	-0.154840906248918	-0.0401874737278814	0	-0.0645084726091956	0	0	0	0.0550371822573728
60	Quetiapine	3	33	22	726	0.850740131578947	0.958810847611483	1	0.934747438432501	1	1	1	-0.161648565340514	-0.0420614627484409	0	-0.0674789055057744	0	0	0	0.0573729348758163
60	Quetiapine	3	33	23	759	0.845007147233	0.957019083753327	1	0.931983152612241	1	1	1	-0.168410193396829	-0.0439319465019595	0	-0.0704405410562371	0	0	0	0.0596858343564997
60	Quetiapine	3	33	24	792	0.839350912778905	0.955234004069636	1	0.929235167977126	1	1	1	-0.175126408731248	-0.0457989380770525	0	-0.0733934312158531	0	0	0	0.06197622908758
60	Quetiapine	3	33	25	825	0.833769897239573	0.95345557122708	1	0.926503340757238	1	1	1	-0.181797817281952	-0.0476624504891634	0	-0.076337627480991	0	0	0	0.0642444601210729
60	Quetiapine	3	33	26	858	0.82826261008807	0.951683748169839	1	0.92378752886836	1	1	1	-0.18842501293998	-0.0495224966811072	0	-0.0792731808945079	0	0	0	0.0664908613715662
60	Quetiapine	3	33	27	891	0.822827599920461	0.949918498117026	1	0.921087591887344	1	1	1	-0.195008577866476	-0.0513790895236105	0	-0.0822001420510581	0	0	0	0.0687157598083309
60	Quetiapine	3	33	28	924	0.817463453180561	0.948159784560144	1	0.918403391027905	1	1	1	-0.201549082799581	-0.0532322418158458	0	-0.0851185611023262	0	0	0	0.0709194756410873
60	Quetiapine	3	33	29	957	0.812168792934249	0.94640757126057	1	0.915734789116844	1	1	1	-0.208047087351337	-0.0550819662859599	0	-0.0880284877621821	0	0	0	0.0731023224996798
60	Quetiapine	3	33	30	990	0.806942277691108	0.944661822247065	1	0.913081650570676	1	1	1	-0.214503140295018	-0.0569282755916001	0	-0.0909299713117637	0	0	0	0.075264607607891
60	Quetiapine	3	33	31	1023	0.801782600271265	0.942922501813313	1	0.910443841372669	1	1	1	-0.220917779843239	-0.0587711823204324	0	-0.0938230606044832	0	0	0	0.0774066319516284
60	Quetiapine	3	33	32	1056	0.796688486715441	0.941189574515482	1	0.907821229050279	1	1	1	-0.227291533917205	-0.0606106989906578	0	-0.0967078040709629	0	0	0	0.0795286904416938
61	Quinine	3	3956.7	1	3956.7	0.856857573882938	0.841301609966228	0.736390467497685	0.83880272308388	0.904449923568633	1	0.952449624867956	-0.154483565697518	-0.172805050762362	-0.305994774441266	-0.175779733555397	-0.100428339340404	0	-0.0487180606575992	-0.0362567902953426
61	Quinine	3	3956.7	2	7913.4	0.74956326902628	0.726074720740492	0.582767420280074	0.72236022229707	0.825566939408902	1	0.909216060132573	-0.28826455002387	-0.320102348323203	-0.539967108282564	-0.325231341660806	-0.191684929377247	0	-0.0951725231336094	-0.0575259299183506
61	Quinine	3	3956.7	3	11870.1	0.666149160036113	0.638609128772195	0.482177366935537	0.634305941939241	0.759339944164093	1	0.869736985056643	-0.406241669499757	-0.448462703826812	-0.729443251425952	-0.455223882674921	-0.275305717582562	0	-0.139564429067057	-0.0702412768419679
61	Quinine	3	3956.7	4	15826.8	0.599441179596981	0.569950791119033	0.41120097619774	0.565386453132981	0.702949335395403	1	0.833543680743115	-0.511757425096407	-0.562205253250425	-0.88867319082226	-0.570245793802788	-0.352470458907406	0	-0.182069171754	-0.0776545884357232
61	Quinine	3	3956.7	5	19783.5	0.544877324959453	0.514622537353713	0.358438863035688	0.509975849897827	0.654355175456221	1	0.80024233244983	-0.607194601473375	-0.664321584225426	-1.02599716895059	-0.673391907526478	-0.424104993203114	0	-0.222840681621579	-0.0815977766423662
61	Quinine	3	3956.7	6	23740.2	0.49941803092027	0.469085802078465	0.317677017348217	0.464456836577245	0.612045129197362	1	0.769499641727398	-0.694311796621499	-0.756969580406196	-1.14672008105924	-0.766886649529856	-0.490949258669944	0	-0.262014791294737	-0.083181494445729
61	Quinine	3	3956.7	7	27696.9	0.460959987855646	0.430952654892711	0.285239445779215	0.426397768292607	0.574874251533771	1	0.741031632272379	-0.774444033991707	-0.841757044349145	-1.25442629082205	-0.852382639979548	-0.553603955086331	0	-0.299711965970491	-0.0831160407090514
61	Quinine	3	3956.7	8	31653.6	0.42800143118908	0.398553271859105	0.258812455217695	0.394103662528282	0.541959812810933	1	0.714594851930796	-0.848628739506212	-0.919914108735041	-1.35165159070628	-0.931141301426033	-0.61256342639674	0	-0.336039537545847	-0.0818745488593957
61	Quinine	3	3956.7	9	35610.3	0.399441439709387	0.370684871469521	0.236867088268511	0.3663568763312	0.512610298193484	1	0.689979393075133	-0.917688108476765	-0.992402980368992	-1.44025610415281	-1.00414734871145	-0.668239375137926	0	-0.371093546945306	-0.079782445051763
61	Quinine	3	3956.7	10	39567	0.374454562701575	0.346459098980055	0.218352429869617	0.342260123678436	0.486276291872241	1	0.66700330749615	-0.982284811285355	-1.0599905077811	-1.52164487078816	-1.07218423547476	-0.720978314822835	0	-0.404960274313966	-0.0770694219332161
61	Quinine	3	3956.7	11	43523.7	0.352409732668538	0.325205583945227	0.202522321796664	0.321137621719254	0.462515760706475	1	0.645508101226851	-1.04296076705933	-1.12329773065262	-1.59690516741591	-1.13588551963239	-0.771074645407083	0	-0.437717518461489	-0.0739010714179257
61	Quinine	3	3956.7	12	47480.4	0.332816228110852	0.306408943568049	0.188832358960867	0.30247071371277	0.440969041625556	1	0.625355073287126	-1.10016480887161	-1.18283465235094	-1.6668956471556	-1.1957708203707	-0.818780606395019	0	-0.469435673303848	-0.0703988859457597
61	Quinine	3	3956.7	13	51437.1	0.31528671323086	0.289666439266095	0.176876017161118	0.285854711000596	0.421340509235562	1	0.606422319499951	-1.15427285340512	-1.23902522742741	-1.73230625986693	-1.2522716007342	-0.86431396167496	0	-0.500178638768077	-0.0666533154848521
61	Quinine	3	3956.7	14	55393.8	0.299511373465455	0.274658796139286	0.166343601196747	0.270969219349642	0.403384930875378	1	0.58860226457469	-1.20560288730474	-1.29222569298403	-1.79369974316222	-1.30575004628897	-0.90786400945133	0	-0.530004595798575	-0.0627325258390485
61	Quinine	3	3956.7	15	59350.5	0.285239445779215	0.261129646689739	0.156995035758165	0.257557277691254	0.386897167974298	1	0.571799616895555	-1.25442629082205	-1.34273826437723	-1.85154109350847	-1.35651314597799	-0.949596337089747	0	-0.55896666909143	-0.0586884124961126
61	Quinine	3	3956.7	16	63307.2	0.272265789346631	0.248870764700229	0.148641343084069	0.245410399994279	0.37170430388189	1	0.555929663891718	-1.30097652308719	-1.39082153452167	-1.90621896813888	-1.40482336783854	-0.98965662283316	0	-0.587113496525708	-0.0545608149304419
61	Quinine	3	3956.7	17	67263.9	0.260420961660889	0.237711271835484	0.141131735295958	0.234357659223543	0.357659556384882	1	0.540916843607505	-1.34545587395783	-1.43669848531336	-1.95806153190477	-1.45090687230754	-1.02817370484936	0	-0.614489720623788	-0.0503805231251012
61	Quinine	3	3956.7	18	71220.6	0.249563777058467	0.22750962350902	0.134344431263492	0.2242575939771	0.34463752006007	1	0.526693541634269	-1.38804077698284	-1.48056274034725	-2.00734839425128	-1.49495991472763	-1.06526208078028	0	-0.641136414511641	-0.0461714566612757
61	Quinine	3	3956.7	19	75177.3	0.239575652195023	0.218147573445599	0.12818000169314	0.214992121445644	0.332530411443457	1	0.513199072985852	-1.42888603645602	-1.52258350280421	-2.05431973969697	-1.53715389596476	-1.10102396008087	0	-0.667091452583184	-0.0419522665091738
61	Quinine	3	3956.7	20	79134	0.230356257112012	0.209525569501396	0.122556466009514	0.206461899461508	0.321245078782369	1	0.500378816577013	-1.46812822447006	-1.56290949694146	-2.09918340818436	-1.57763938984409	-1.13555096185543	0	-0.692389834265036	-0.03773752741272
61	Quinine	3	3956.7	21	83090.7	0.221820133232561	0.20155919981704	0.117405625655248	0.198582750528792	0.310700600695018	1	0.488183476269937	-1.50588843617205	-1.60167214512682	-2.14212045403733	-1.61654938648665	-1.16892552922479	0	-0.717063967827256	-0.0335386356401522
61	Quinine	3	3956.7	22	87047.4	0.213894036433781	0.194176419999833	0.112670284728707	0.191282874566596	0.30082634272661	1	0.476568447409342	-1.54227454344241	-1.63898815171317	-2.18328955970615	-1.65400192788875	-1.20122211518708	0	-0.741143920014411	-0.0293644918647907
61	Quinine	3	3956.7	23	91004.1	0.206514830092834	0.187315368156343	0.108302117148146	0.184500654610366	0.291560373073968	1	0.465493271685752	-1.57738305272954	-1.67496162187651	-2.22283057624526	-1.69010226748419	-1.23250818289024	0	-0.764657636320597	-0.0252220254458858
61	Quinine	3	3956.7	24	94960.8	0.199627799719838	0.180922627339323	0.104260011432474	0.178182913341261	0.282848162351658	1	0.45492116628438	-1.61130064764944	-1.70968581237246	-2.26086738998868	-1.72494465327184	-1.2628450541147	0	-0.787631135956043	-0.0211166003497327
61	Quinine	3	3956.7	25	98917.5	0.193185293937726	0.174951832050245	0.100508772807253	0.172283515959383	0.274641509710678	1	0.444818615771883	-1.64410547843562	-1.74324458837277	-2.29751026367824	-1.75861381060314	-1.29228863279466	0	-0.810088684916403	-0.017052331848639
61	Quinine	3	3956.7	26	102874.2	0.187145620389509	0.169362541855168	0.0970180957664193	0.166762241704411	0.266897650633662	1	0.435155017180206	-1.67586824651113	-1.775713643676	-2.33285776358486	-1.79118618336134	-1.32089002503205	0	-0.832052950041265	-0.0130323353386483
61	Quinine	3	3956.7	27	106830.9	0.181472142474595	0.164119324227895	0.0937617435459804	0.161583865628524	0.259578511531779	1	0.425902370369654	-1.70665312204571	-1.80716152896541	-2.3669983574861	-1.82273097928727	-1.34869607287958	0	-0.853545136513975	-0.00905892307194434
61	Quinine	3	3956.7	28	110787.6	0.176132535549993	0.159191002640345	0.0907168874742902	0.156717406296098	0.252650083715257	1	0.417035007072136	-1.73651852444084	-1.83765052324718	-2.4000117487371	-1.85331105540561	-1.37574981589554	0	-0.874585110893649	-0.00513376060988591
61	Quinine	3	3956.7	29	114744.3	0.171098170690743	0.154550036177477	0.0878635709987416	0.152135505452095	0.246081895013906	1	0.408529353092269	-1.76551778960378	-1.86723737632136	-2.43196999706809	-1.88298367203357	-1.40209089189027	0	-0.895191511468554	-0.00125799190036435
61	Quinine	3	3956.7	30	118701	0.166343601196747	0.150172004596335	0.0851842717758219	0.147813913418049	0.239846561727525	1	0.400363719027052	-1.79369974316222	-1.89597394453217	-2.46293846575837	-1.91180113810533	-1.42775588623156	0	-0.915381847467121	0.00256766024927235
61	Quinine	3	3956.7	31	122657.7	0.161846132400181	0.146035178496337	0.0826635415116367	0.143731059773105	0.233919407010275	1	0.392518115592113	-1.82110919509447	-1.92390773769221	-2.49297662649458	-1.93981136608568	-1.45277863743473	0	-0.935172588449945	0.00634281311391272
61	Quinine	3	3956.7	32	126614.4	0.157585459422992	0.142120158628741	0.0802877079105148	0.139867693273389	0.228278134474003	1	0.384974090244059	-1.84778736835928	-1.95108239166936	-2.52213874682643	-1.9670583512595	-1.47719050544268	0	-0.954579245026349	0.0100673584003766
62	Ranolazine	3	2311	1	2311	0.838515826986234	0.98536471065064	0.773320255026974	0.98083986237201	0.993346021289277	1	0.999936084848788	-0.176121822540738	-0.0147434417211375	-0.257062014735945	-0.0193460719140006	-0.00667621512236206	0	-6.39171938727171e-05	0.0449508230595228
62	Ranolazine	3	2311	2	4622	0.721934785224401	0.97115162560777	0.630417399648169	0.962400143175569	0.986780008123059	1	0.999872177867346	-0.325820469342834	-0.029272668805618	-0.461373139854632	-0.0383249655523845	-0.0133081538318551	0	-0.000127830302598837	0.084980454345583
62	Ranolazine	3	2311	3	6933	0.633813975598162	0.957342734790313	0.532091516501316	0.94464096073844	0.98030022760014	1	0.999808279054109	-0.455999781482212	-0.0435938170669334	-0.630939780936124	-0.0569503594087777	-0.0198963995405166	0	-0.000191739326700614	0.120529072648289
62	Ranolazine	3	2311	4	9244	0.564865373752589	0.943921038103847	0.460298925735638	0.927525323799668	0.973904992039385	1	0.999744388407511	-0.571167852772152	-0.057712762411598	-0.775879161996908	-0.0752351815852235	-0.026441524204745	0	-0.000255644266700044	0.152228320025256
62	Ranolazine	3	2311	5	11555	0.509445977499469	0.9308704756207	0.405576418540048	0.911018874317529	0.967592657514268	1	0.999680505925986	-0.674431462364004	-0.0716351353142065	-0.902445968089502	-0.0931916636958228	-0.0329440886232702	0	-0.000319545123119205	0.18066311326014
62	Ranolazine	3	2311	6	13866	0.463929482718627	0.918175863473011	0.36248275862069	0.89508965725959	0.961361622444032	1	0.999616631607969	-0.768022715205052	-0.0853663342986097	-1.01477836824422	-0.110831390015494	-0.0394046427254948	0	-0.000383441896479695	0.206327134457488
62	Ranolazine	3	2311	7	16177	0.425879263228875	0.905822834920709	0.327667179252733	0.879707914129133	0.955210326238936	1	0.999552765451896	-0.853599392534235	-0.0989115385059904	-1.11575688315212	-0.128165342368462	-0.0458237258505836	0	-0.000447334587303414	0.229626362629436
[truncated: 1,529 more rows]
